# Supplementary material for: Global burden of Klebsiella pneumoniae infections and antimicrobial resistance in 2019
Source: Research Square preprint supplement (doi:10.21203/rs.3.rs-4057357/v1), 2024-03-21
Supplement: Supplementary file 1 [file c87af4ae853fb12600f3c9a5.pdf]

# Global and regional burden associated with *Klebsiella pneumoniae* infection and antimicrobial resistance in 2019

## Contents of appendix 2

|                                                                                                                                                                                                        |    |
|--------------------------------------------------------------------------------------------------------------------------------------------------------------------------------------------------------|----|
| Section 1: List of abbreviations.....                                                                                                                                                                  | 3  |
| Section 2: List of International Classification of Diseases (ICD) codes mapped to the Global Burden of Disease cause list for causes of death.....                                                     | 4  |
| Section 3: supplementary data.....                                                                                                                                                                     | 11 |
| Section 3.1: Figure 1 Global number of deaths and age-standardised mortality rates associated with <i>Klebsiella pneumoniae</i> infection in 204 countries and territories.....                        | 11 |
| Section 3.1.1: Figure 1A Global number of deaths associated with <i>Klebsiella pneumoniae</i> infection in 204 countries and territories.....                                                          | 11 |
| Section 3.1.2: Figure 1B Global age-standardised mortality rates associated with <i>Klebsiella pneumoniae</i> infection in 204 countries and territories.....                                          | 14 |
| Section 3.2: Figure 2 Global and regional deaths associated with and attributable to antimicrobial resistance in <i>Klebsiella pneumoniae</i> , by infectious syndrome, 2019.....                      | 17 |
| Section 3.3: Figure 3 Global and regional mortality rates in all ages associated with and attributable to antimicrobial resistance in <i>Klebsiella pneumoniae</i> , by infectious syndrome, 2019..... | 20 |
| Section 3.4: Figure 4 Deaths (number and all-age rate) associated with and attributable to antimicrobial resistance in <i>Klebsiella pneumoniae</i> , by GBD region, 2019.....                         | 23 |
| Section 3.4.1: Figure 4A Deaths associated with and attributable to antimicrobial resistance in KP, by GBD region, 2019.....                                                                           | 23 |
| Section 3.4.2: Figure 4B All-age mortality rates associated with and attributable to antimicrobial resistance in KP, by GBD region, 2019.....                                                          | 24 |

|                                                                                                                                                                                           |    |
|-------------------------------------------------------------------------------------------------------------------------------------------------------------------------------------------|----|
| Section 3.5: S.Figure 1 Regional deaths associated with and attributable to KP antimicrobial resistance by infectious syndrome, 2019 .....                                                | 25 |
| Section 3.6: S.Figure 2 Regional mortality rates in all ages associated with and attributable to <i>Klebsiella pneumoniae</i> antimicrobial resistance by infectious syndrome, 2019 ..... | 34 |

## List of abbreviations

| Abbreviation | Full phrase                                                                                                                                  |
|--------------|----------------------------------------------------------------------------------------------------------------------------------------------|
| ASMR         | age-standardised mortality rates                                                                                                             |
| AMR          | antimicrobial resistance                                                                                                                     |
| ATR          | attributable to resistance                                                                                                                   |
| AWR          | associated with resistance                                                                                                                   |
| BSI          | bloodstream infections                                                                                                                       |
| CNS          | central nervous system                                                                                                                       |
| DALYs        | disability-adjusted life-years                                                                                                               |
| ESKAPE       | Enterococcus faecium, Staphylococcus aureus, Klebsiella pneumoniae, Acinetobacter baumannii, Pseudomonas aeruginosa, and Enterobacter specie |
| GBD          | Global Burden of Diseases, Injuries, and Risk Factors Study                                                                                  |
| IAI          | intra-abdominal infection                                                                                                                    |
| ICD          | International Classification of Diseases                                                                                                     |
| KP           | Klebsiella pneumoniae                                                                                                                        |
| LMICs        | Low- and middle-income countries                                                                                                             |
| LRI          | lower respiratory infection                                                                                                                  |
| YLDs         | years lived with disability                                                                                                                  |
| YLLs         | years of life lost                                                                                                                           |
| UI           | uncertainty interval                                                                                                                         |
| UTI          | urinary tract infection                                                                                                                      |
| WHO          | World Health Organization                                                                                                                    |
| 3GCs         | third-generation cephalosporins                                                                                                              |

| List of International Classification of Diseases (ICD) codes mapped to the Global Burden of Disease cause list for causes of death |                                                                                                                                                                                                                                                                                                                                                                                                                                                                                                                                                                                                                                                                                                                                                                                                                                                                                                                                                                                                                                                                                                                                                                                                                                                       |                                                                                                                                                                                                                                                                                                                                                                                                                                                                                                                                                                                                                                                                                     |
|------------------------------------------------------------------------------------------------------------------------------------|-------------------------------------------------------------------------------------------------------------------------------------------------------------------------------------------------------------------------------------------------------------------------------------------------------------------------------------------------------------------------------------------------------------------------------------------------------------------------------------------------------------------------------------------------------------------------------------------------------------------------------------------------------------------------------------------------------------------------------------------------------------------------------------------------------------------------------------------------------------------------------------------------------------------------------------------------------------------------------------------------------------------------------------------------------------------------------------------------------------------------------------------------------------------------------------------------------------------------------------------------------|-------------------------------------------------------------------------------------------------------------------------------------------------------------------------------------------------------------------------------------------------------------------------------------------------------------------------------------------------------------------------------------------------------------------------------------------------------------------------------------------------------------------------------------------------------------------------------------------------------------------------------------------------------------------------------------|
| Cause                                                                                                                              | ICD10                                                                                                                                                                                                                                                                                                                                                                                                                                                                                                                                                                                                                                                                                                                                                                                                                                                                                                                                                                                                                                                                                                                                                                                                                                                 | ICD9                                                                                                                                                                                                                                                                                                                                                                                                                                                                                                                                                                                                                                                                                |
| Communicable, maternal, neonatal, and nutritional diseases                                                                         | A00-A00.9, A01.0-A14, A15-A28.9, A32-A39.9, A48.1-A48.2, A48.4-A48.5, A50-A58, A60-A60.9, A63-A63.8, A65-A65.0, A68-A70, A74, A74.8-A75.9, A77-A96.9, A98-A98.8, B00-B06.9, B10-B10.8, B15-B16.2, B17.0, B17.2, B19.1, B20-B27.9, B29.4, B33-B33.1, B33.3-B33.8, B47-B48.8, B50-B54.0, B55.0, B56-B57.5, B60-B60.8, B63, B65-B67.9, B69-B72.0, B74.3-B75, B77-B77.9, B83-B83.8, B90-B91, B94.1, B95-B95.5, B97.4-B97.6, C58-C58.0, D50.1-D50.8, D51-D52.0, D52.8-D53.9, D70.3, D89.3, E00-E02, E40-E46.9, E51-E61.9, E63-E64.0, E64.2-E64.9, F02.1, F02.4, F07.1, G00.0-G00.8, G03-G03.8, G04-G05.8, G14-G14.6, G21.3, H70-H70.9, I00, I02, I02.9, I98.0-I98.1, J00-J02.8, J03-J03.8, J04-J04.2, J05-J05.1, J06.0-J06.8, J09-J15.8, J16-J16.9, J20-J21.9, J36-J36.0, J91.0, K52.1, K67.0-K67.8, K75.3, K76.3, K77.0, K93.0-K93.1, M03.1, M12.1, M49.0-M49.1, M73.0-M73.1, M89.6, N74.1, N96, N98-N98.9, O00-O07.9, O09-O16.9, O20-O26.9, O28-O36.9, O40-O48.1, O60-O77.9, O80-O92.7, O96-O98.6, O98.8-P04.2, P04.5-P05.9, P07-P15.9, P19-P22.9, P23.0-P23.4, P24-P29.9, P35-P37.2, P37.5-P39.9, P50-P61.9, P70-P70.1, P70.3-P72.9, P74-P78.9, P80-P81.9, P83-P84, P90-P94.9, P96, P96.3-P96.4, P96.8, R19.7, U04-U04.9, U06-U06.9, U82-U89, Z16-Z16.3 | 001-001.9, 002.0-029, 032-034.9, 036-036.3, 036.5-037.9, 040, 040.1-041.0, 042-066.9, 070.0-070.2, 071-075.9, 078.3-078.7, 079-079.7, 080-083.9, 084.0-084.5, 084.7-084.9, 085.0, 086-088, 088.8-088.9, 090-101.6, 104-104.9, 120-124.9, 125.4-125.9, 127-127.1, 128-129.0, 136-136.2, 137-139.0, 181-181.9, 244.2, 260-263.9, 265-269.9, 281.0-281.9, 320.0-320.8, 321-323.9, 381-383.9, 390-390.9, 392, 392.9, 425.6, 460-464.4, 464.8-464.9, 465.0-465.8, 466-469, 470.0, 475-475.9, 476.9, 480-482.8, 483.0-483.9, 484.0-484.7, 487-489, 630-636.9, 638-638.9, 640-679.1, 716.0, 730.4-730.6, 760-760.6, 760.8-768, 768.2-770, 770.1-775.0, 775.4-779.3, 779.6-779.8, V09-V09.9 |
| HIV/AIDS and sexually transmitted infections                                                                                       | A50-A58, A60-A60.9, A63-A63.8, B20-B24.9, B63, F02.4, I98.0, K67.0-K67.2, M03.1, M73.0-M73.1                                                                                                                                                                                                                                                                                                                                                                                                                                                                                                                                                                                                                                                                                                                                                                                                                                                                                                                                                                                                                                                                                                                                                          | 042-044.9, 054.1, 090-099.9                                                                                                                                                                                                                                                                                                                                                                                                                                                                                                                                                                                                                                                         |
| HIV/AIDS                                                                                                                           | B20-B24.9, F02.4                                                                                                                                                                                                                                                                                                                                                                                                                                                                                                                                                                                                                                                                                                                                                                                                                                                                                                                                                                                                                                                                                                                                                                                                                                      | 042-044.9                                                                                                                                                                                                                                                                                                                                                                                                                                                                                                                                                                                                                                                                           |
| HIV/AIDS-drug-susceptible tuberculosis                                                                                             | B20.0                                                                                                                                                                                                                                                                                                                                                                                                                                                                                                                                                                                                                                                                                                                                                                                                                                                                                                                                                                                                                                                                                                                                                                                                                                                 |                                                                                                                                                                                                                                                                                                                                                                                                                                                                                                                                                                                                                                                                                     |
| HIV/AIDS-multidrug-resistant tuberculosis without extensive drug resistance                                                        |                                                                                                                                                                                                                                                                                                                                                                                                                                                                                                                                                                                                                                                                                                                                                                                                                                                                                                                                                                                                                                                                                                                                                                                                                                                       |                                                                                                                                                                                                                                                                                                                                                                                                                                                                                                                                                                                                                                                                                     |
| HIV/AIDS-extensively drug-resistant tuberculosis                                                                                   |                                                                                                                                                                                                                                                                                                                                                                                                                                                                                                                                                                                                                                                                                                                                                                                                                                                                                                                                                                                                                                                                                                                                                                                                                                                       |                                                                                                                                                                                                                                                                                                                                                                                                                                                                                                                                                                                                                                                                                     |
| HIV/AIDS resulting in other diseases                                                                                               | B20, B20.1-B24.9, F02.4                                                                                                                                                                                                                                                                                                                                                                                                                                                                                                                                                                                                                                                                                                                                                                                                                                                                                                                                                                                                                                                                                                                                                                                                                               | 042-044.9                                                                                                                                                                                                                                                                                                                                                                                                                                                                                                                                                                                                                                                                           |
| Sexually transmitted infections excluding HIV                                                                                      | A50-A58, A60-A60.9, A63-A63.8, B63, I98.0, K67.0-K67.2, M03.1, M73.0-M73.1                                                                                                                                                                                                                                                                                                                                                                                                                                                                                                                                                                                                                                                                                                                                                                                                                                                                                                                                                                                                                                                                                                                                                                            | 054.1, 090-099.9                                                                                                                                                                                                                                                                                                                                                                                                                                                                                                                                                                                                                                                                    |
| Syphilis                                                                                                                           | A50-A53.9, I98.0, K67.2, M03.1, M73.1                                                                                                                                                                                                                                                                                                                                                                                                                                                                                                                                                                                                                                                                                                                                                                                                                                                                                                                                                                                                                                                                                                                                                                                                                 | 090-097.9                                                                                                                                                                                                                                                                                                                                                                                                                                                                                                                                                                                                                                                                           |
| Chlamydial infection                                                                                                               | A55-A56.8, K67.0                                                                                                                                                                                                                                                                                                                                                                                                                                                                                                                                                                                                                                                                                                                                                                                                                                                                                                                                                                                                                                                                                                                                                                                                                                      |                                                                                                                                                                                                                                                                                                                                                                                                                                                                                                                                                                                                                                                                                     |
| Gonococcal infection                                                                                                               | A54-A54.9, K67.1, M73.0                                                                                                                                                                                                                                                                                                                                                                                                                                                                                                                                                                                                                                                                                                                                                                                                                                                                                                                                                                                                                                                                                                                                                                                                                               | 098-098.9                                                                                                                                                                                                                                                                                                                                                                                                                                                                                                                                                                                                                                                                           |
| Other sexually transmitted infections                                                                                              | A57-A58, A63-A63.8, B63                                                                                                                                                                                                                                                                                                                                                                                                                                                                                                                                                                                                                                                                                                                                                                                                                                                                                                                                                                                                                                                                                                                                                                                                                               | 099-099.9                                                                                                                                                                                                                                                                                                                                                                                                                                                                                                                                                                                                                                                                           |
| Respiratory infections and tuberculosis                                                                                            | A10-A14, A15-A19.9, A48.1, A70, B90-B90.9, B97.4-B97.6, H70-H70.9, J00-J02.8, J03-J03.8, J04-J04.2, J05-J05.1, J06.0-J06.8, J09-J15.8, J16-J16.9, J20-J21.9, J36-J36.0, J91.0, K67.3, K93.0, M49.0, N74.1, P23.0-P23.4, P37.0, U04-U04.9, U84.3                                                                                                                                                                                                                                                                                                                                                                                                                                                                                                                                                                                                                                                                                                                                                                                                                                                                                                                                                                                                       | 010-019.9, 034.0, 079.6, 137-137.9, 138.0-138.9, 381-383.9, 460-464.4, 464.8-464.9, 465.0-465.8, 466-469, 470.0, 475-475.9, 476.9, 480-482.8, 483.0-483.9, 484.1-484.2, 484.6-484.7, 487-489, 730.4-730.6                                                                                                                                                                                                                                                                                                                                                                                                                                                                           |
| Tuberculosis                                                                                                                       | A10-A14, A15-A19.9, B90-B90.9, K67.3, K93.0, M49.0, N74.1, P37.0, U84.3                                                                                                                                                                                                                                                                                                                                                                                                                                                                                                                                                                                                                                                                                                                                                                                                                                                                                                                                                                                                                                                                                                                                                                               | 010-019.9, 137-137.9, 138.0-138.9, 730.4-730.6                                                                                                                                                                                                                                                                                                                                                                                                                                                                                                                                                                                                                                      |
| Drug-susceptible tuberculosis                                                                                                      | A10-A14, A15-A19.9, B90-B90.9, K67.3, K93.0, M49.0, N74.1, P37.0                                                                                                                                                                                                                                                                                                                                                                                                                                                                                                                                                                                                                                                                                                                                                                                                                                                                                                                                                                                                                                                                                                                                                                                      | 010-019.9, 137-137.9, 138.0-138.9, 730.4-730.6                                                                                                                                                                                                                                                                                                                                                                                                                                                                                                                                                                                                                                      |
| Multidrug-resistant tuberculosis without extensive drug resistance                                                                 | U84.3                                                                                                                                                                                                                                                                                                                                                                                                                                                                                                                                                                                                                                                                                                                                                                                                                                                                                                                                                                                                                                                                                                                                                                                                                                                 |                                                                                                                                                                                                                                                                                                                                                                                                                                                                                                                                                                                                                                                                                     |
| Extensively drug-resistant tuberculosis                                                                                            |                                                                                                                                                                                                                                                                                                                                                                                                                                                                                                                                                                                                                                                                                                                                                                                                                                                                                                                                                                                                                                                                                                                                                                                                                                                       |                                                                                                                                                                                                                                                                                                                                                                                                                                                                                                                                                                                                                                                                                     |
| Lower respiratory infections                                                                                                       | A48.1, A70, B97.4-B97.6, J09-J15.8, J16-J16.9, J20-J21.9, J91.0, P23.0-P23.4, U04-U04.9                                                                                                                                                                                                                                                                                                                                                                                                                                                                                                                                                                                                                                                                                                                                                                                                                                                                                                                                                                                                                                                                                                                                                               | 079.6, 466-469, 470.0, 480-482.8, 483.0-483.9, 484.1-484.2, 484.6-484.7, 487-489                                                                                                                                                                                                                                                                                                                                                                                                                                                                                                                                                                                                    |
| Upper respiratory infections                                                                                                       | J00-J02.8, J03-J03.8, J04-J04.2, J05-J05.1, J06.0-J06.8, J36-J36.0                                                                                                                                                                                                                                                                                                                                                                                                                                                                                                                                                                                                                                                                                                                                                                                                                                                                                                                                                                                                                                                                                                                                                                                    | 034.0, 460-464.4, 464.8-464.9, 465.0-465.8, 475-475.9, 476.9                                                                                                                                                                                                                                                                                                                                                                                                                                                                                                                                                                                                                        |
| Otitis media                                                                                                                       | H70-H70.9                                                                                                                                                                                                                                                                                                                                                                                                                                                                                                                                                                                                                                                                                                                                                                                                                                                                                                                                                                                                                                                                                                                                                                                                                                             | 381-383.9                                                                                                                                                                                                                                                                                                                                                                                                                                                                                                                                                                                                                                                                           |
| Enteric infections                                                                                                                 | A00-A00.9, A01.0-A09.9, A80-A80.9, K52.1, R19.7                                                                                                                                                                                                                                                                                                                                                                                                                                                                                                                                                                                                                                                                                                                                                                                                                                                                                                                                                                                                                                                                                                                                                                                                       | 001-001.9, 002.0-009.9, 045-045.9, 138                                                                                                                                                                                                                                                                                                                                                                                                                                                                                                                                                                                                                                              |
| Diarrheal diseases                                                                                                                 | A00-A00.9, A02-A02.0, A02.8-A07, A07.2-A07.4, A08-A09.9, K52.1, R19.7                                                                                                                                                                                                                                                                                                                                                                                                                                                                                                                                                                                                                                                                                                                                                                                                                                                                                                                                                                                                                                                                                                                                                                                 | 001-001.9, 003.8-006.9, 007.4-007.8, 008.2-009.9                                                                                                                                                                                                                                                                                                                                                                                                                                                                                                                                                                                                                                    |
| Typhoid and paratyphoid                                                                                                            | A01.0-A01.4                                                                                                                                                                                                                                                                                                                                                                                                                                                                                                                                                                                                                                                                                                                                                                                                                                                                                                                                                                                                                                                                                                                                                                                                                                           | 002.0-002.9                                                                                                                                                                                                                                                                                                                                                                                                                                                                                                                                                                                                                                                                         |
| Typhoid fever                                                                                                                      | A01.0                                                                                                                                                                                                                                                                                                                                                                                                                                                                                                                                                                                                                                                                                                                                                                                                                                                                                                                                                                                                                                                                                                                                                                                                                                                 | 002.0                                                                                                                                                                                                                                                                                                                                                                                                                                                                                                                                                                                                                                                                               |
| Paratyphoid fever                                                                                                                  | A01.1-A01.4                                                                                                                                                                                                                                                                                                                                                                                                                                                                                                                                                                                                                                                                                                                                                                                                                                                                                                                                                                                                                                                                                                                                                                                                                                           | 002.1-002.9                                                                                                                                                                                                                                                                                                                                                                                                                                                                                                                                                                                                                                                                         |
| Invasive non-typhoidal Salmonella (iNTS)                                                                                           | A02.1-A02.2                                                                                                                                                                                                                                                                                                                                                                                                                                                                                                                                                                                                                                                                                                                                                                                                                                                                                                                                                                                                                                                                                                                                                                                                                                           | 003-003.7                                                                                                                                                                                                                                                                                                                                                                                                                                                                                                                                                                                                                                                                           |
| Other intestinal infectious diseases                                                                                               | A07.0-A07.1, A07.8-A07.9, A80-A80.9                                                                                                                                                                                                                                                                                                                                                                                                                                                                                                                                                                                                                                                                                                                                                                                                                                                                                                                                                                                                                                                                                                                                                                                                                   | 007-007.3, 007.9-008.1, 045-045.9, 138                                                                                                                                                                                                                                                                                                                                                                                                                                                                                                                                                                                                                                              |
| Neglected tropical diseases and malaria                                                                                            | A68-A68.9, A69.2-A69.9, A75-A75.9, A77-A79.9, A82-A82.9, A90-A96.9, A98-A98.8, B33.0-B33.1, B50-B54.0, B55.0, B56-B57.5, B60-B60.8, B65-B67.9, B69-B72.0, B74.3-B75, B77-B77.9, B83-B83.8, K93.1, P37.1, U06-U06.9                                                                                                                                                                                                                                                                                                                                                                                                                                                                                                                                                                                                                                                                                                                                                                                                                                                                                                                                                                                                                                    | 060-061.8, 065-066.9, 071-071.9, 080-083.9, 084.0-084.5, 084.7-084.9, 085.0, 086-088, 088.8-088.9, 120-124.9, 125.4-125.9, 127-127.1, 128-129.0, 425.6                                                                                                                                                                                                                                                                                                                                                                                                                                                                                                                              |
| Malaria                                                                                                                            | B50-B54.0                                                                                                                                                                                                                                                                                                                                                                                                                                                                                                                                                                                                                                                                                                                                                                                                                                                                                                                                                                                                                                                                                                                                                                                                                                             | 084.0-084.5, 084.7-084.9                                                                                                                                                                                                                                                                                                                                                                                                                                                                                                                                                                                                                                                            |
| Leprosy                                                                                                                            | A30-A30.9                                                                                                                                                                                                                                                                                                                                                                                                                                                                                                                                                                                                                                                                                                                                                                                                                                                                                                                                                                                                                                                                                                                                                                                                                                             | 030-030.9                                                                                                                                                                                                                                                                                                                                                                                                                                                                                                                                                                                                                                                                           |
| Chagas disease                                                                                                                     | B57-B57.5, K93.1                                                                                                                                                                                                                                                                                                                                                                                                                                                                                                                                                                                                                                                                                                                                                                                                                                                                                                                                                                                                                                                                                                                                                                                                                                      | 086-086.2, 086.9, 425.6                                                                                                                                                                                                                                                                                                                                                                                                                                                                                                                                                                                                                                                             |
| Leishmaniasis                                                                                                                      | B55.0                                                                                                                                                                                                                                                                                                                                                                                                                                                                                                                                                                                                                                                                                                                                                                                                                                                                                                                                                                                                                                                                                                                                                                                                                                                 | 085.0                                                                                                                                                                                                                                                                                                                                                                                                                                                                                                                                                                                                                                                                               |
| Visceral leishmaniasis                                                                                                             | B55.0                                                                                                                                                                                                                                                                                                                                                                                                                                                                                                                                                                                                                                                                                                                                                                                                                                                                                                                                                                                                                                                                                                                                                                                                                                                 | 085.0                                                                                                                                                                                                                                                                                                                                                                                                                                                                                                                                                                                                                                                                               |
| African trypanosomiasis                                                                                                            | B56-B56.9                                                                                                                                                                                                                                                                                                                                                                                                                                                                                                                                                                                                                                                                                                                                                                                                                                                                                                                                                                                                                                                                                                                                                                                                                                             | 086.3-086.5                                                                                                                                                                                                                                                                                                                                                                                                                                                                                                                                                                                                                                                                         |
| Schistosomiasis                                                                                                                    | B65-B65.9                                                                                                                                                                                                                                                                                                                                                                                                                                                                                                                                                                                                                                                                                                                                                                                                                                                                                                                                                                                                                                                                                                                                                                                                                                             | 120-120.9                                                                                                                                                                                                                                                                                                                                                                                                                                                                                                                                                                                                                                                                           |
| Cysticercosis                                                                                                                      | B69-B69.9                                                                                                                                                                                                                                                                                                                                                                                                                                                                                                                                                                                                                                                                                                                                                                                                                                                                                                                                                                                                                                                                                                                                                                                                                                             | 123.1                                                                                                                                                                                                                                                                                                                                                                                                                                                                                                                                                                                                                                                                               |
| Cystic echinococcosis                                                                                                              | B67-B67.4, B67.8-B67.9                                                                                                                                                                                                                                                                                                                                                                                                                                                                                                                                                                                                                                                                                                                                                                                                                                                                                                                                                                                                                                                                                                                                                                                                                                | 122-122.4, 122.8-122.9                                                                                                                                                                                                                                                                                                                                                                                                                                                                                                                                                                                                                                                              |
| Dengue                                                                                                                             | A90-A91.9                                                                                                                                                                                                                                                                                                                                                                                                                                                                                                                                                                                                                                                                                                                                                                                                                                                                                                                                                                                                                                                                                                                                                                                                                                             | 061-061.8                                                                                                                                                                                                                                                                                                                                                                                                                                                                                                                                                                                                                                                                           |
| Yellow fever                                                                                                                       | A95-A95.9                                                                                                                                                                                                                                                                                                                                                                                                                                                                                                                                                                                                                                                                                                                                                                                                                                                                                                                                                                                                                                                                                                                                                                                                                                             | 060-060.9                                                                                                                                                                                                                                                                                                                                                                                                                                                                                                                                                                                                                                                                           |
| Rabies                                                                                                                             | A82-A82.9                                                                                                                                                                                                                                                                                                                                                                                                                                                                                                                                                                                                                                                                                                                                                                                                                                                                                                                                                                                                                                                                                                                                                                                                                                             | 071-071.9                                                                                                                                                                                                                                                                                                                                                                                                                                                                                                                                                                                                                                                                           |
| Intestinal nematode infections                                                                                                     | B77-B77.9                                                                                                                                                                                                                                                                                                                                                                                                                                                                                                                                                                                                                                                                                                                                                                                                                                                                                                                                                                                                                                                                                                                                                                                                                                             | 127.0                                                                                                                                                                                                                                                                                                                                                                                                                                                                                                                                                                                                                                                                               |
| Ascariasis                                                                                                                         | B77-B77.9                                                                                                                                                                                                                                                                                                                                                                                                                                                                                                                                                                                                                                                                                                                                                                                                                                                                                                                                                                                                                                                                                                                                                                                                                                             | 127.0                                                                                                                                                                                                                                                                                                                                                                                                                                                                                                                                                                                                                                                                               |
| Ebola virus disease                                                                                                                | A98.4                                                                                                                                                                                                                                                                                                                                                                                                                                                                                                                                                                                                                                                                                                                                                                                                                                                                                                                                                                                                                                                                                                                                                                                                                                                 |                                                                                                                                                                                                                                                                                                                                                                                                                                                                                                                                                                                                                                                                                     |
| Zika virus disease                                                                                                                 | U06-U06.9                                                                                                                                                                                                                                                                                                                                                                                                                                                                                                                                                                                                                                                                                                                                                                                                                                                                                                                                                                                                                                                                                                                                                                                                                                             |                                                                                                                                                                                                                                                                                                                                                                                                                                                                                                                                                                                                                                                                                     |
| Other neglected tropical diseases                                                                                                  | A68-A68.9, A69.2-A69.9, A75-A75.9, A77-A79.9, A92-A94.0, A96-A96.9, A98-A98.3, A98.5-A98.8, B33.0-B33.1, B60-B60.8, B67.5-B67.7, B70-B71.9, B74.3-B75, B83-B83.8, P37.1                                                                                                                                                                                                                                                                                                                                                                                                                                                                                                                                                                                                                                                                                                                                                                                                                                                                                                                                                                                                                                                                               | 065-066.9, 080-083.9, 087-088, 088.8-088.9, 122.5-122.7, 123-123.0, 123.2-124.9, 125.4-125.6, 125.9, 127, 127.1, 128-129.0                                                                                                                                                                                                                                                                                                                                                                                                                                                                                                                                                          |
| Other infectious diseases                                                                                                          | A20-A28.9, A32-A39.9, A48.2, A48.4-A48.5, A65-A65.0, A69-A69.1, A74, A74.8-A74.9, A81-A81.9, A83-A89.9, B00-B06.9, B10-B10.8, B15-B16.2, B17.0, B17.2, B19.1, B25-B27.9, B29.4, B33, B33.3-B33.8, B47-B48.8, B91, B94.1, B95-B95.5, D70.3, D89.3, F02.1, F07.1, G00.0-G00.8, G03-G03.8, G04-G05.8, G14-G14.6, G21.3, I00, I02, I02.9, I98.1, K67.8, K75.3, K76.3, K77.0, M49.1, M89.6, P35-P35.9, P37, P37.2, P37.5-P37.9, U82-U84, U85-U89, Z16-Z16.3                                                                                                                                                                                                                                                                                                                                                                                                                                                                                                                                                                                                                                                                                                                                                                                                | 020-029, 032-034, 034.1-034.9, 036-036.3, 036.5-037.9, 040, 040.1-041.0, 046-054.0, 054.2-059.9, 062-064.9, 070.0-070.2, 072-075.9, 078.3-078.7, 079-079.5, 079.7, 100-101.6, 104-104.9, 136-136.2, 139-139.0, 320.0-320.8, 321-323.9, 390-390.9, 392, 392.9, 484.0, 484.3-484.5, 771.0-771.3, V09-V09.9                                                                                                                                                                                                                                                                                                                                                                            |
| Meningitis                                                                                                                         | A39-A39.9, A87-A87.9, G00.0-G00.8, G03-G03.8                                                                                                                                                                                                                                                                                                                                                                                                                                                                                                                                                                                                                                                                                                                                                                                                                                                                                                                                                                                                                                                                                                                                                                                                          | 036-036.3, 036.5-036.9, 047-049.9, 320.0-320.8, 321-322.9                                                                                                                                                                                                                                                                                                                                                                                                                                                                                                                                                                                                                           |
| Encephalitis                                                                                                                       | A83-A86.4, B94.1, F07.1, G04-G05.8, G21.3                                                                                                                                                                                                                                                                                                                                                                                                                                                                                                                                                                                                                                                                                                                                                                                                                                                                                                                                                                                                                                                                                                                                                                                                             | 062-064.9, 139.0, 323, 323.4-323.9                                                                                                                                                                                                                                                                                                                                                                                                                                                                                                                                                                                                                                                  |
| Diphtheria                                                                                                                         | A36-A36.9                                                                                                                                                                                                                                                                                                                                                                                                                                                                                                                                                                                                                                                                                                                                                                                                                                                                                                                                                                                                                                                                                                                                                                                                                                             | 032-032.9                                                                                                                                                                                                                                                                                                                                                                                                                                                                                                                                                                                                                                                                           |
| Whooping cough                                                                                                                     | A37-A37.9                                                                                                                                                                                                                                                                                                                                                                                                                                                                                                                                                                                                                                                                                                                                                                                                                                                                                                                                                                                                                                                                                                                                                                                                                                             | 033-033.9, 484.3                                                                                                                                                                                                                                                                                                                                                                                                                                                                                                                                                                                                                                                                    |
| Tetanus                                                                                                                            | A33-A35.0                                                                                                                                                                                                                                                                                                                                                                                                                                                                                                                                                                                                                                                                                                                                                                                                                                                                                                                                                                                                                                                                                                                                                                                                                                             | 037-037.9, 771.3                                                                                                                                                                                                                                                                                                                                                                                                                                                                                                                                                                                                                                                                    |
| Measles                                                                                                                            | B05-B05.9                                                                                                                                                                                                                                                                                                                                                                                                                                                                                                                                                                                                                                                                                                                                                                                                                                                                                                                                                                                                                                                                                                                                                                                                                                             | 055-055.9, 484.0                                                                                                                                                                                                                                                                                                                                                                                                                                                                                                                                                                                                                                                                    |

| List of International Classification of Diseases (ICD) codes mapped to the Global Burden of Disease cause list for causes of death |                                                                                                                                                                                                                                                                                                                                                                                                                                                                                                                                                                                                                                                                                                                                                                                                                                                                                                                                                                                                                                                                                                                                                                                                                                                                                                                                                                                                                                                                                                                                                                                                                                                                                                                                                                                                                                                                                                                                                                                                                                                                                                                                                                                                                                                                                                                                                                                                                                                                                                                                                                                                                                                                                                  |                                                                                                                                                                                                                                                                                                                                                                                                                                                                                                                                                                                                                                                                                                                                                                                                                                                                                                                                                                                                                                                                                                                                                                                                                                                                                                                                                                                                                                                                                                                                                                                                                                                                                                                                                                                                                                                                                                                                                                                                                                                                                                             |
|------------------------------------------------------------------------------------------------------------------------------------|--------------------------------------------------------------------------------------------------------------------------------------------------------------------------------------------------------------------------------------------------------------------------------------------------------------------------------------------------------------------------------------------------------------------------------------------------------------------------------------------------------------------------------------------------------------------------------------------------------------------------------------------------------------------------------------------------------------------------------------------------------------------------------------------------------------------------------------------------------------------------------------------------------------------------------------------------------------------------------------------------------------------------------------------------------------------------------------------------------------------------------------------------------------------------------------------------------------------------------------------------------------------------------------------------------------------------------------------------------------------------------------------------------------------------------------------------------------------------------------------------------------------------------------------------------------------------------------------------------------------------------------------------------------------------------------------------------------------------------------------------------------------------------------------------------------------------------------------------------------------------------------------------------------------------------------------------------------------------------------------------------------------------------------------------------------------------------------------------------------------------------------------------------------------------------------------------------------------------------------------------------------------------------------------------------------------------------------------------------------------------------------------------------------------------------------------------------------------------------------------------------------------------------------------------------------------------------------------------------------------------------------------------------------------------------------------------|-------------------------------------------------------------------------------------------------------------------------------------------------------------------------------------------------------------------------------------------------------------------------------------------------------------------------------------------------------------------------------------------------------------------------------------------------------------------------------------------------------------------------------------------------------------------------------------------------------------------------------------------------------------------------------------------------------------------------------------------------------------------------------------------------------------------------------------------------------------------------------------------------------------------------------------------------------------------------------------------------------------------------------------------------------------------------------------------------------------------------------------------------------------------------------------------------------------------------------------------------------------------------------------------------------------------------------------------------------------------------------------------------------------------------------------------------------------------------------------------------------------------------------------------------------------------------------------------------------------------------------------------------------------------------------------------------------------------------------------------------------------------------------------------------------------------------------------------------------------------------------------------------------------------------------------------------------------------------------------------------------------------------------------------------------------------------------------------------------------|
| Cause                                                                                                                              | ICD10                                                                                                                                                                                                                                                                                                                                                                                                                                                                                                                                                                                                                                                                                                                                                                                                                                                                                                                                                                                                                                                                                                                                                                                                                                                                                                                                                                                                                                                                                                                                                                                                                                                                                                                                                                                                                                                                                                                                                                                                                                                                                                                                                                                                                                                                                                                                                                                                                                                                                                                                                                                                                                                                                            | ICD9                                                                                                                                                                                                                                                                                                                                                                                                                                                                                                                                                                                                                                                                                                                                                                                                                                                                                                                                                                                                                                                                                                                                                                                                                                                                                                                                                                                                                                                                                                                                                                                                                                                                                                                                                                                                                                                                                                                                                                                                                                                                                                        |
| Varicella and herpes zoster                                                                                                        | B01-B02.9, P35.8                                                                                                                                                                                                                                                                                                                                                                                                                                                                                                                                                                                                                                                                                                                                                                                                                                                                                                                                                                                                                                                                                                                                                                                                                                                                                                                                                                                                                                                                                                                                                                                                                                                                                                                                                                                                                                                                                                                                                                                                                                                                                                                                                                                                                                                                                                                                                                                                                                                                                                                                                                                                                                                                                 | 052-053.9                                                                                                                                                                                                                                                                                                                                                                                                                                                                                                                                                                                                                                                                                                                                                                                                                                                                                                                                                                                                                                                                                                                                                                                                                                                                                                                                                                                                                                                                                                                                                                                                                                                                                                                                                                                                                                                                                                                                                                                                                                                                                                   |
| Acute hepatitis                                                                                                                    | B15-B16.2, B17.0, B17.2, B19.1, P35.3                                                                                                                                                                                                                                                                                                                                                                                                                                                                                                                                                                                                                                                                                                                                                                                                                                                                                                                                                                                                                                                                                                                                                                                                                                                                                                                                                                                                                                                                                                                                                                                                                                                                                                                                                                                                                                                                                                                                                                                                                                                                                                                                                                                                                                                                                                                                                                                                                                                                                                                                                                                                                                                            | 070.0-070.2                                                                                                                                                                                                                                                                                                                                                                                                                                                                                                                                                                                                                                                                                                                                                                                                                                                                                                                                                                                                                                                                                                                                                                                                                                                                                                                                                                                                                                                                                                                                                                                                                                                                                                                                                                                                                                                                                                                                                                                                                                                                                                 |
| Acute hepatitis A                                                                                                                  | B15-B15.9                                                                                                                                                                                                                                                                                                                                                                                                                                                                                                                                                                                                                                                                                                                                                                                                                                                                                                                                                                                                                                                                                                                                                                                                                                                                                                                                                                                                                                                                                                                                                                                                                                                                                                                                                                                                                                                                                                                                                                                                                                                                                                                                                                                                                                                                                                                                                                                                                                                                                                                                                                                                                                                                                        | 070.0-070.1                                                                                                                                                                                                                                                                                                                                                                                                                                                                                                                                                                                                                                                                                                                                                                                                                                                                                                                                                                                                                                                                                                                                                                                                                                                                                                                                                                                                                                                                                                                                                                                                                                                                                                                                                                                                                                                                                                                                                                                                                                                                                                 |
| Acute hepatitis B                                                                                                                  | B16-B16.2, B17.0, B19.1, P35.3                                                                                                                                                                                                                                                                                                                                                                                                                                                                                                                                                                                                                                                                                                                                                                                                                                                                                                                                                                                                                                                                                                                                                                                                                                                                                                                                                                                                                                                                                                                                                                                                                                                                                                                                                                                                                                                                                                                                                                                                                                                                                                                                                                                                                                                                                                                                                                                                                                                                                                                                                                                                                                                                   | 070.2                                                                                                                                                                                                                                                                                                                                                                                                                                                                                                                                                                                                                                                                                                                                                                                                                                                                                                                                                                                                                                                                                                                                                                                                                                                                                                                                                                                                                                                                                                                                                                                                                                                                                                                                                                                                                                                                                                                                                                                                                                                                                                       |
| Acute hepatitis C                                                                                                                  |                                                                                                                                                                                                                                                                                                                                                                                                                                                                                                                                                                                                                                                                                                                                                                                                                                                                                                                                                                                                                                                                                                                                                                                                                                                                                                                                                                                                                                                                                                                                                                                                                                                                                                                                                                                                                                                                                                                                                                                                                                                                                                                                                                                                                                                                                                                                                                                                                                                                                                                                                                                                                                                                                                  |                                                                                                                                                                                                                                                                                                                                                                                                                                                                                                                                                                                                                                                                                                                                                                                                                                                                                                                                                                                                                                                                                                                                                                                                                                                                                                                                                                                                                                                                                                                                                                                                                                                                                                                                                                                                                                                                                                                                                                                                                                                                                                             |
| Acute hepatitis E                                                                                                                  | B17.2                                                                                                                                                                                                                                                                                                                                                                                                                                                                                                                                                                                                                                                                                                                                                                                                                                                                                                                                                                                                                                                                                                                                                                                                                                                                                                                                                                                                                                                                                                                                                                                                                                                                                                                                                                                                                                                                                                                                                                                                                                                                                                                                                                                                                                                                                                                                                                                                                                                                                                                                                                                                                                                                                            |                                                                                                                                                                                                                                                                                                                                                                                                                                                                                                                                                                                                                                                                                                                                                                                                                                                                                                                                                                                                                                                                                                                                                                                                                                                                                                                                                                                                                                                                                                                                                                                                                                                                                                                                                                                                                                                                                                                                                                                                                                                                                                             |
| Other unspecified infectious diseases                                                                                              | A20-A28.9, A32-A32.9, A38-A38.9, A48.2, A48.4-A48.5, A65-A65.0, A69-A69.1, A74, A74.8-A74.9, A81-A81.9, A88-A89.9, B00-B00.9, B03-B04, B06-B06.9, B10-B10.8, B25-B27.9, B29.4, B33, B33.3-B33.8, B47-B48.8, B91, B95-B95.5, D70.3, D89.3, F02.1, G14-G14.6, I00, I02, I02.9, I98.1, K67.8, K75.3, K76.3, K77.0, M49.1, M89.6, P35-P35.2, P35.9, P37, P37.2, P37.5-P37.9, U82-U84, U85-U89, Z16-Z16.3, C58-C58.0, N96, N98-N98.9, O00-O07.9, O09-O16.9, O20-O26.9, O28-O36.9, O40-O48.1, O60-O77.9, O80-O92.7, O96-O98.6, O98.8-P04.2, P04.5-P05.9, P07-P15.9, P19-P22.9, P24-P29.9, P36-P36.9, P38-P39.9, P50-P61.9, P70-P70.1, P70.3-P72.9, P74-P78.9, P80-P81.9, P83-P84, P90-P94.9, P96, P96.3-P96.4, P96.8                                                                                                                                                                                                                                                                                                                                                                                                                                                                                                                                                                                                                                                                                                                                                                                                                                                                                                                                                                                                                                                                                                                                                                                                                                                                                                                                                                                                                                                                                                                                                                                                                                                                                                                                                                                                                                                                                                                                                                                   | 020-029, 034, 034.1-034.9, 040, 040.1-041.0, 046-046.9, 050-051.9, 054-054.0, 054.2-054.9, 056-059.9, 072-075.9, 078.3-078.7, 079-079.5, 079.7, 100-101.6, 104-104.9, 136-136.2, 139, 323.0-323.3, 390-390.9, 392, 392.9, 484.4-484.5, 771.0-771.2, V09-V09.9                                                                                                                                                                                                                                                                                                                                                                                                                                                                                                                                                                                                                                                                                                                                                                                                                                                                                                                                                                                                                                                                                                                                                                                                                                                                                                                                                                                                                                                                                                                                                                                                                                                                                                                                                                                                                                               |
| Maternal and neonatal disorders                                                                                                    | C58-C58.0, N96, N98-N98.9, O00-O07.9, O09-O16.9, O20-O26.9, O28-O36.9, O40-O48.1, O60-O77.9, O80-O92.7, O96-O98.6, O98.8-O99.9                                                                                                                                                                                                                                                                                                                                                                                                                                                                                                                                                                                                                                                                                                                                                                                                                                                                                                                                                                                                                                                                                                                                                                                                                                                                                                                                                                                                                                                                                                                                                                                                                                                                                                                                                                                                                                                                                                                                                                                                                                                                                                                                                                                                                                                                                                                                                                                                                                                                                                                                                                   | 181-181.9, 630-636.9, 638-638.9, 640-679.1, 760-760.6, 760.8-768, 768.2-770, 770.1-771, 771.4-775.0, 775.4-779.3, 779.6-779.8                                                                                                                                                                                                                                                                                                                                                                                                                                                                                                                                                                                                                                                                                                                                                                                                                                                                                                                                                                                                                                                                                                                                                                                                                                                                                                                                                                                                                                                                                                                                                                                                                                                                                                                                                                                                                                                                                                                                                                               |
| Maternal disorders                                                                                                                 | C58-C58.0, N96, N98-N98.9, O00-O07.9, O09-O16.9, O20-O26.9, O28-O36.9, O40-O48.1, O60-O77.9, O80-O92.7, O96-O98.6, O98.8-O99.9                                                                                                                                                                                                                                                                                                                                                                                                                                                                                                                                                                                                                                                                                                                                                                                                                                                                                                                                                                                                                                                                                                                                                                                                                                                                                                                                                                                                                                                                                                                                                                                                                                                                                                                                                                                                                                                                                                                                                                                                                                                                                                                                                                                                                                                                                                                                                                                                                                                                                                                                                                   | 181-181.9, 630-636.9, 638-638.9, 640-679.1                                                                                                                                                                                                                                                                                                                                                                                                                                                                                                                                                                                                                                                                                                                                                                                                                                                                                                                                                                                                                                                                                                                                                                                                                                                                                                                                                                                                                                                                                                                                                                                                                                                                                                                                                                                                                                                                                                                                                                                                                                                                  |
| Maternal haemorrhage                                                                                                               | O20-O20.9, O43.2, O44-O46.9, O62-O62.9, O67-O67.9, O70, O72-O72.3                                                                                                                                                                                                                                                                                                                                                                                                                                                                                                                                                                                                                                                                                                                                                                                                                                                                                                                                                                                                                                                                                                                                                                                                                                                                                                                                                                                                                                                                                                                                                                                                                                                                                                                                                                                                                                                                                                                                                                                                                                                                                                                                                                                                                                                                                                                                                                                                                                                                                                                                                                                                                                | 640-641.9, 661-661.9, 665, 666-666.9                                                                                                                                                                                                                                                                                                                                                                                                                                                                                                                                                                                                                                                                                                                                                                                                                                                                                                                                                                                                                                                                                                                                                                                                                                                                                                                                                                                                                                                                                                                                                                                                                                                                                                                                                                                                                                                                                                                                                                                                                                                                        |
| Maternal sepsis and other maternal infections                                                                                      | O23-O23.9, O85-O86.8, O91-O91.2                                                                                                                                                                                                                                                                                                                                                                                                                                                                                                                                                                                                                                                                                                                                                                                                                                                                                                                                                                                                                                                                                                                                                                                                                                                                                                                                                                                                                                                                                                                                                                                                                                                                                                                                                                                                                                                                                                                                                                                                                                                                                                                                                                                                                                                                                                                                                                                                                                                                                                                                                                                                                                                                  | 659.3, 670-670.9                                                                                                                                                                                                                                                                                                                                                                                                                                                                                                                                                                                                                                                                                                                                                                                                                                                                                                                                                                                                                                                                                                                                                                                                                                                                                                                                                                                                                                                                                                                                                                                                                                                                                                                                                                                                                                                                                                                                                                                                                                                                                            |
| Maternal hypertensive disorders                                                                                                    | O10-O16.9                                                                                                                                                                                                                                                                                                                                                                                                                                                                                                                                                                                                                                                                                                                                                                                                                                                                                                                                                                                                                                                                                                                                                                                                                                                                                                                                                                                                                                                                                                                                                                                                                                                                                                                                                                                                                                                                                                                                                                                                                                                                                                                                                                                                                                                                                                                                                                                                                                                                                                                                                                                                                                                                                        | 642-642.9                                                                                                                                                                                                                                                                                                                                                                                                                                                                                                                                                                                                                                                                                                                                                                                                                                                                                                                                                                                                                                                                                                                                                                                                                                                                                                                                                                                                                                                                                                                                                                                                                                                                                                                                                                                                                                                                                                                                                                                                                                                                                                   |
| Maternal obstructed labor and uterine rupture                                                                                      | O32-O33.9, O64-O66.9, O71-O71.9                                                                                                                                                                                                                                                                                                                                                                                                                                                                                                                                                                                                                                                                                                                                                                                                                                                                                                                                                                                                                                                                                                                                                                                                                                                                                                                                                                                                                                                                                                                                                                                                                                                                                                                                                                                                                                                                                                                                                                                                                                                                                                                                                                                                                                                                                                                                                                                                                                                                                                                                                                                                                                                                  | 652-653.9, 660-660.9, 665.0-665.3                                                                                                                                                                                                                                                                                                                                                                                                                                                                                                                                                                                                                                                                                                                                                                                                                                                                                                                                                                                                                                                                                                                                                                                                                                                                                                                                                                                                                                                                                                                                                                                                                                                                                                                                                                                                                                                                                                                                                                                                                                                                           |
| Maternal abortion and miscarriage                                                                                                  | N96, O01-O07.9                                                                                                                                                                                                                                                                                                                                                                                                                                                                                                                                                                                                                                                                                                                                                                                                                                                                                                                                                                                                                                                                                                                                                                                                                                                                                                                                                                                                                                                                                                                                                                                                                                                                                                                                                                                                                                                                                                                                                                                                                                                                                                                                                                                                                                                                                                                                                                                                                                                                                                                                                                                                                                                                                   | 630-632.9, 634-636.9, 638-638.9, 646.3                                                                                                                                                                                                                                                                                                                                                                                                                                                                                                                                                                                                                                                                                                                                                                                                                                                                                                                                                                                                                                                                                                                                                                                                                                                                                                                                                                                                                                                                                                                                                                                                                                                                                                                                                                                                                                                                                                                                                                                                                                                                      |
| Ectopic pregnancy                                                                                                                  | O00-O00.9                                                                                                                                                                                                                                                                                                                                                                                                                                                                                                                                                                                                                                                                                                                                                                                                                                                                                                                                                                                                                                                                                                                                                                                                                                                                                                                                                                                                                                                                                                                                                                                                                                                                                                                                                                                                                                                                                                                                                                                                                                                                                                                                                                                                                                                                                                                                                                                                                                                                                                                                                                                                                                                                                        | 633-633.9                                                                                                                                                                                                                                                                                                                                                                                                                                                                                                                                                                                                                                                                                                                                                                                                                                                                                                                                                                                                                                                                                                                                                                                                                                                                                                                                                                                                                                                                                                                                                                                                                                                                                                                                                                                                                                                                                                                                                                                                                                                                                                   |
| Indirect maternal deaths                                                                                                           | O24-O25.3, O98-O98.6, O98.8-O99.9                                                                                                                                                                                                                                                                                                                                                                                                                                                                                                                                                                                                                                                                                                                                                                                                                                                                                                                                                                                                                                                                                                                                                                                                                                                                                                                                                                                                                                                                                                                                                                                                                                                                                                                                                                                                                                                                                                                                                                                                                                                                                                                                                                                                                                                                                                                                                                                                                                                                                                                                                                                                                                                                | 646-646.2, 646.4-649.9                                                                                                                                                                                                                                                                                                                                                                                                                                                                                                                                                                                                                                                                                                                                                                                                                                                                                                                                                                                                                                                                                                                                                                                                                                                                                                                                                                                                                                                                                                                                                                                                                                                                                                                                                                                                                                                                                                                                                                                                                                                                                      |
| Late maternal deaths                                                                                                               | O96-O97.9                                                                                                                                                                                                                                                                                                                                                                                                                                                                                                                                                                                                                                                                                                                                                                                                                                                                                                                                                                                                                                                                                                                                                                                                                                                                                                                                                                                                                                                                                                                                                                                                                                                                                                                                                                                                                                                                                                                                                                                                                                                                                                                                                                                                                                                                                                                                                                                                                                                                                                                                                                                                                                                                                        |                                                                                                                                                                                                                                                                                                                                                                                                                                                                                                                                                                                                                                                                                                                                                                                                                                                                                                                                                                                                                                                                                                                                                                                                                                                                                                                                                                                                                                                                                                                                                                                                                                                                                                                                                                                                                                                                                                                                                                                                                                                                                                             |
| Maternal deaths aggravated by HIV/AIDS                                                                                             |                                                                                                                                                                                                                                                                                                                                                                                                                                                                                                                                                                                                                                                                                                                                                                                                                                                                                                                                                                                                                                                                                                                                                                                                                                                                                                                                                                                                                                                                                                                                                                                                                                                                                                                                                                                                                                                                                                                                                                                                                                                                                                                                                                                                                                                                                                                                                                                                                                                                                                                                                                                                                                                                                                  |                                                                                                                                                                                                                                                                                                                                                                                                                                                                                                                                                                                                                                                                                                                                                                                                                                                                                                                                                                                                                                                                                                                                                                                                                                                                                                                                                                                                                                                                                                                                                                                                                                                                                                                                                                                                                                                                                                                                                                                                                                                                                                             |
| Other maternal disorders                                                                                                           | C58-C58.0, N98-N98.9, O09-O09.9, O21-O22.9, O26-O26.9, O28-O31.8, O34-O36.9, O40-O43.1, O43.8-O43.9, O47-O48.1, O60-O61.9, O63-O63.9, O68-O69.9, O70.0-O70.9, O73-O77.9, O80-O84.9, O87-O90.9, O92-O92.7                                                                                                                                                                                                                                                                                                                                                                                                                                                                                                                                                                                                                                                                                                                                                                                                                                                                                                                                                                                                                                                                                                                                                                                                                                                                                                                                                                                                                                                                                                                                                                                                                                                                                                                                                                                                                                                                                                                                                                                                                                                                                                                                                                                                                                                                                                                                                                                                                                                                                         | 181-181.9, 643-645.2, 650-651.9, 654-659.2, 659.4-659.9, 662-664.9, 665.4-665.9, 667-669.9, 671-679.1                                                                                                                                                                                                                                                                                                                                                                                                                                                                                                                                                                                                                                                                                                                                                                                                                                                                                                                                                                                                                                                                                                                                                                                                                                                                                                                                                                                                                                                                                                                                                                                                                                                                                                                                                                                                                                                                                                                                                                                                       |
| Neonatal disorders                                                                                                                 | P00-P04.2, P04.5-P05.9, P07-P15.9, P19-P22.9, P24-P29.9, P36-P36.9, P38-P39.9, P50-P61.9, P70-P70.1, P70.3-P72.9, P74-P78.9, P80-P81.9, P83-P84, P90-P94.9, P96, P96.3-P96.4, P96.8                                                                                                                                                                                                                                                                                                                                                                                                                                                                                                                                                                                                                                                                                                                                                                                                                                                                                                                                                                                                                                                                                                                                                                                                                                                                                                                                                                                                                                                                                                                                                                                                                                                                                                                                                                                                                                                                                                                                                                                                                                                                                                                                                                                                                                                                                                                                                                                                                                                                                                              | 760-760.6, 760.8-768, 768.2-770, 770.1-771, 771.4-775.0, 775.4-779.3, 779.6-779.8                                                                                                                                                                                                                                                                                                                                                                                                                                                                                                                                                                                                                                                                                                                                                                                                                                                                                                                                                                                                                                                                                                                                                                                                                                                                                                                                                                                                                                                                                                                                                                                                                                                                                                                                                                                                                                                                                                                                                                                                                           |
| Neonatal preterm birth                                                                                                             | P01.0-P01.1, P07-P07.3, P22-P22.9, P25-P28.9, P61.2, P77-P77.9                                                                                                                                                                                                                                                                                                                                                                                                                                                                                                                                                                                                                                                                                                                                                                                                                                                                                                                                                                                                                                                                                                                                                                                                                                                                                                                                                                                                                                                                                                                                                                                                                                                                                                                                                                                                                                                                                                                                                                                                                                                                                                                                                                                                                                                                                                                                                                                                                                                                                                                                                                                                                                   | 761.0-761.1, 765-765.9, 769-769.9, 770.2-770.9, 776.6, 777.5-777.6                                                                                                                                                                                                                                                                                                                                                                                                                                                                                                                                                                                                                                                                                                                                                                                                                                                                                                                                                                                                                                                                                                                                                                                                                                                                                                                                                                                                                                                                                                                                                                                                                                                                                                                                                                                                                                                                                                                                                                                                                                          |
| Neonatal encephalopathy due to birth asphyxia and trauma                                                                           | P01.7, P02-P03.9, P10-P15.9, P20-P21.9, P24-P24.9, P90-P91.9                                                                                                                                                                                                                                                                                                                                                                                                                                                                                                                                                                                                                                                                                                                                                                                                                                                                                                                                                                                                                                                                                                                                                                                                                                                                                                                                                                                                                                                                                                                                                                                                                                                                                                                                                                                                                                                                                                                                                                                                                                                                                                                                                                                                                                                                                                                                                                                                                                                                                                                                                                                                                                     | 761.7-763.9, 767-768, 768.2-768.9, 770.1, 772.1-772.9, 779.0-779.2                                                                                                                                                                                                                                                                                                                                                                                                                                                                                                                                                                                                                                                                                                                                                                                                                                                                                                                                                                                                                                                                                                                                                                                                                                                                                                                                                                                                                                                                                                                                                                                                                                                                                                                                                                                                                                                                                                                                                                                                                                          |
| Neonatal sepsis and other neonatal infections                                                                                      | P36-P36.9, P38-P39.9                                                                                                                                                                                                                                                                                                                                                                                                                                                                                                                                                                                                                                                                                                                                                                                                                                                                                                                                                                                                                                                                                                                                                                                                                                                                                                                                                                                                                                                                                                                                                                                                                                                                                                                                                                                                                                                                                                                                                                                                                                                                                                                                                                                                                                                                                                                                                                                                                                                                                                                                                                                                                                                                             | 771.4-771.9                                                                                                                                                                                                                                                                                                                                                                                                                                                                                                                                                                                                                                                                                                                                                                                                                                                                                                                                                                                                                                                                                                                                                                                                                                                                                                                                                                                                                                                                                                                                                                                                                                                                                                                                                                                                                                                                                                                                                                                                                                                                                                 |
| Hemolytic disease and other neonatal jaundice                                                                                      | P55-P59.9                                                                                                                                                                                                                                                                                                                                                                                                                                                                                                                                                                                                                                                                                                                                                                                                                                                                                                                                                                                                                                                                                                                                                                                                                                                                                                                                                                                                                                                                                                                                                                                                                                                                                                                                                                                                                                                                                                                                                                                                                                                                                                                                                                                                                                                                                                                                                                                                                                                                                                                                                                                                                                                                                        | 773-774.9                                                                                                                                                                                                                                                                                                                                                                                                                                                                                                                                                                                                                                                                                                                                                                                                                                                                                                                                                                                                                                                                                                                                                                                                                                                                                                                                                                                                                                                                                                                                                                                                                                                                                                                                                                                                                                                                                                                                                                                                                                                                                                   |
| Other neonatal disorders                                                                                                           | P00-P01, P01.2-P01.6, P01.8-P01.9, P04-P04.2, P04.5-P05.9, P08-P09, P19-P19.9, P29-P29.9, P50-P54.9, P60-P61.1, P61.3-P61.9, P70-P70.1, P70.3-P72.9, P74-P76.9, P78-P78.9, P80-P81.9, P83-P84, P92-P94.9, P96, P96.3-P96.4, P96.8                                                                                                                                                                                                                                                                                                                                                                                                                                                                                                                                                                                                                                                                                                                                                                                                                                                                                                                                                                                                                                                                                                                                                                                                                                                                                                                                                                                                                                                                                                                                                                                                                                                                                                                                                                                                                                                                                                                                                                                                                                                                                                                                                                                                                                                                                                                                                                                                                                                                | 760-760.6, 760.8-761, 761.2-761.6, 764-764.9, 766-766.9, 770, 771, 772-772.0, 775-775.0, 775.4-776.5, 776.7-777.4, 777.7-779, 779.3, 779.6-779.8                                                                                                                                                                                                                                                                                                                                                                                                                                                                                                                                                                                                                                                                                                                                                                                                                                                                                                                                                                                                                                                                                                                                                                                                                                                                                                                                                                                                                                                                                                                                                                                                                                                                                                                                                                                                                                                                                                                                                            |
| Nutritional deficiencies                                                                                                           | D50.1-D50.8, D51-D52.0, D52.8-D53.9, E00-E02, E40-E46.9, E51-E61.9, E63-E64.0, E64.2-E64.9, M12.1                                                                                                                                                                                                                                                                                                                                                                                                                                                                                                                                                                                                                                                                                                                                                                                                                                                                                                                                                                                                                                                                                                                                                                                                                                                                                                                                                                                                                                                                                                                                                                                                                                                                                                                                                                                                                                                                                                                                                                                                                                                                                                                                                                                                                                                                                                                                                                                                                                                                                                                                                                                                | 244.2, 260-263.9, 265-269.9, 281.0-281.9, 716.0                                                                                                                                                                                                                                                                                                                                                                                                                                                                                                                                                                                                                                                                                                                                                                                                                                                                                                                                                                                                                                                                                                                                                                                                                                                                                                                                                                                                                                                                                                                                                                                                                                                                                                                                                                                                                                                                                                                                                                                                                                                             |
| Protein-energy malnutrition                                                                                                        | E40-E46.9, E64.0                                                                                                                                                                                                                                                                                                                                                                                                                                                                                                                                                                                                                                                                                                                                                                                                                                                                                                                                                                                                                                                                                                                                                                                                                                                                                                                                                                                                                                                                                                                                                                                                                                                                                                                                                                                                                                                                                                                                                                                                                                                                                                                                                                                                                                                                                                                                                                                                                                                                                                                                                                                                                                                                                 | 260-263.9                                                                                                                                                                                                                                                                                                                                                                                                                                                                                                                                                                                                                                                                                                                                                                                                                                                                                                                                                                                                                                                                                                                                                                                                                                                                                                                                                                                                                                                                                                                                                                                                                                                                                                                                                                                                                                                                                                                                                                                                                                                                                                   |
| Other nutritional deficiencies                                                                                                     | D51-D52.0, D52.8-D53.9, E00-E02, E51-E61.9, E63-E64, E64.2-E64.9, M12.1                                                                                                                                                                                                                                                                                                                                                                                                                                                                                                                                                                                                                                                                                                                                                                                                                                                                                                                                                                                                                                                                                                                                                                                                                                                                                                                                                                                                                                                                                                                                                                                                                                                                                                                                                                                                                                                                                                                                                                                                                                                                                                                                                                                                                                                                                                                                                                                                                                                                                                                                                                                                                          | 244.2, 265-269.9, 281.0-281.9, 716.0                                                                                                                                                                                                                                                                                                                                                                                                                                                                                                                                                                                                                                                                                                                                                                                                                                                                                                                                                                                                                                                                                                                                                                                                                                                                                                                                                                                                                                                                                                                                                                                                                                                                                                                                                                                                                                                                                                                                                                                                                                                                        |
| Non-communicable diseases                                                                                                          | A46-A46.0, A66-A67.9, B18-B18.9, B33.2, B86, C00-C13.9, C15-C22.8, C23-C25.9, C30-C34.9, C37-C38.8, C40-C41.9, C43-C45.9, C47-C54.9, C56-C57.8, C60-C63.8, C64-C67.9, C68.0-C68.8, C69.0-C69.8, C70-C73.9, C75-C75.8, C81-C86.6, C88-C91.0, C91.2-C91.3, C91.6, C92-C92.6, C93-C93.1, C93.3, C93.8, C94-C96.9, D00.1-D00.2, D01.0-D01.3, D02.0-D02.3, D03-D06.9, D07.0-D07.2, D07.4-D07.5, D09.0, D09.2-D09.3, D09.8, D10.0-D10.7, D11-D12.9, D13.0-D13.7, D14.0-D14.3, D15-D16.9, D22-D27.9, D28.0-D28.7, D29.0-D29.8, D30.0-D30.8, D31-D36, D36.1-D36.7, D37.1-D37.5, D38.0-D38.5, D39.1-D39.2, D39.8, D40.0-D40.8, D41.0-D41.8, D42-D43.9, D44.0-D44.8, D45-D47.9, D48.0-D48.6, D49.2-D49.4, D49.6, D52.1, D55-D58.9, D59.0-D59.3, D59.5-D59.6, D60-D61.9, D63.1, D64.0, D66-D67, D68.0-D69.8, D70-D70.2, D70.4-D75.8, D76-D78.8, D86-D86.9, D89-D89.2, E03-E07.1, E09-E11.9, E15.0, E16.0-E16.9, E20-E34, E34.1-E34.8, E36-E36.8, E65-E68, E70-E85.2, E88-E89.9, F00-F02.0, F02.2-F02.3, F02.8-F03.9, F10-F16.9, F18-F18.9, F24, F50.0-F50.5, G10-G13.8, G20-G20.9, G21.0-G21.1, G23-G26.0, G30-G31.9, G35-G37.9, G40-G41.9, G45-G46.8, G47.3, G61-G61.9, G62.1, G70-G73.7, G90-G90.9, G93.7, G95-G95.9, G97-G97.9, H05.0-H05.1, I01-I01.9, I02.0, I05-I09.9, I11-I13.9, I20-I25.9, I27.0-I27.2, I28-I28.9, I30-I31.1, I31.8-I37.8, I38-I41.9, I42.1-I42.8, I43-I43.9, I47-I48.9, I51.0-I51.4, I60-I63.9, I65-I66.9, I67.0-I67.3, I67.5-I67.7, I68.0-I68.2, I69.0-I69.3, I70.2-I70.8, I71-I73.9, I77-I79.9, I95.2-I95.3, I97-I98, I98.2, I98.9, I30-I35.9, I37-I39.9, I41-I46.9, I60-I63.8, I65-I68.9, I70-I70.9, I82, I84-I84.9, J91, J91.8, J92.9, J95-J95.9, K20-K20.9, K22-K22.6, K22.8-K29.9, K31-K31.8, K35-K38.9, K40-K46.9, K50-K52.0, K52.2-K52.9, K55-K62.9, K63.5, K64-K64.9, K66.8, K67, K68, K70-K70.3, K71.7, K73-K75, K75.1-K75.2, K75.4-K76.2, K76.4-K77, K77.8, K80-K83.9, K85-K86.9, K90-K91.9, K92.8, K93.8-K95.8, L00-L05.9, L08-L08.9, L10-L14.0, L51-L51.9, L88-L89.9, L93-L93.2, L97-L98.4, M00-M03.0, M03.2-M03.6, M05-M09.8, M30-M36.8, M40-M43.1, M65-M65.0, M71.0-M71.1, M72.5-M72.6, M80-M82.8, M86.3-M86.4, M87-M87.1, M88-M89.0, M89.5, M89.7-M89.9, N00-N08.8, N10-N12.9, N13.6, N14-N16.8, N18-N18.9, N20-N23.0, N25-N28.1, N29-N30.3, N30.8-N32.0, N32.3-N32.4, N34-N34.3, N36-N36.9, N39-N39.2, N41-N41.9, N44-N44.0, N45-N45.9, N49-N49.9, N60-N60.9, N65-N65.1, N72-N72.0, N75-N77.8, N80-N81.9, N83-N83.9, N84.0-N84.1, N87-N87.9, N99-N99.9, P04.3-P04.4, P70.2, P96.0-P96.2, P96.5, Q00-Q07.9, Q10.4-Q18.9, Q20-Q28.9, Q30-Q36, Q37-Q45.9, Q50-Q87.8, Q89-Q89.8, Q90-Q93.9, Q95-Q99.8, R50.2, R78.0-R78.5, R95-R95.9, X45-X45.9, X65-X65.9, Y15-Y15.9 | 035-035.9, 036.4, 102-103.9, 133-133.6, 135-135.9, 140-148.9, 150-155.1, 155.3-158.9, 160-164.9, 170-175.9, 180-180.9, 182-183.8, 184.0-184.4, 184.8, 185-186.9, 187.1-187.8, 188-188.9, 189.0-189.8, 190-190.8, 191-193.9, 194.1-194.8, 200-204.0, 204.2, 205-205.3, 206-206.1, 207-208.9, 209.0-209.1, 209.4-209.5, 210.0-210.9, 211.0-211.8, 212.0-212.8, 213-213.9, 217-220.9, 221.0-221.8, 222.0-222.8, 223.0-223.8, 224-228.9, 229.0, 229.8, 230.1-230.8, 231.0-231.2, 232-232.9, 233.0-233.2, 233.4-233.5, 233.7, 234.0-234.8, 235.0, 235.4, 235.6-235.8, 236.0-236.2, 236.4-236.5, 236.7, 237-237.3, 237.5-237.9, 238.0-238.9, 239.2-239.4, 239.6, 240-243.9, 244.0-244.1, 244.3-244.8, 245-246.9, 251-251.9, 259.3-259.9, 270-273.9, 275-276, 277-277.2, 277.4-277.9, 278.0-278.8, 282-284.9, 286-286.5, 286.7-289.0, 289.4-289.7, 290-292.9, 294.1-294.9, 303-303.9, 304.0-304.8, 305.0, 305.2-305.8, 307.1, 327.2, 327.8, 330-331.2, 331.5-332.0, 333-337.9, 340-341.9, 345-345.9, 349, 349.2-349.8, 353.8-353.9, 356-356.9, 357.0-357.1, 357.3-357.7, 358-359.9, 376.0-376.1, 391-391.9, 392.0, 393-398.9, 402-404.9, 410-414.9, 416.0-416.1, 417-417.9, 420-423, 423.1-423.9, 424.0-424.3, 424.8, 425.0-425.3, 425.5, 425.7-425.8, 427.0-427.3, 427.6-427.8, 429.0, 430-435.9, 437.0-437.2, 437.4-437.8, 440.2, 440.4, 441-443.9, 446-457, 457.1-457.9, 459, 459.1-459.3, 470, 470.9-474.9, 476-476.1, 477-479, 491-493.9, 495-504.9, 506-506.9, 508-509, 515, 516-517.8, 518.6-518.7, 518.9, 519.0-519.4, 530-530.0, 530.2-530.6, 531-536.1, 536.4, 537-537.6, 537.8, 538-543.9, 550-553.6, 555-558.9, 560-560.3, 560.8-560.9, 562-562.1, 564-564.7, 565-566.9, 569.0-569.7, 571-571.9, 572.2-573.0, 573.4-577.9, 579-583.9, 585-585.9, 588-590.9, 592-593.8, 594-599.6, 599.8, 601-602.9, 604-604.9, 608.2, 610-610.9, 617-618.9, 620-620.9, 621.4-621.9, 622.1-622.7, 629-629.8, 680-689, 694-695.5, 707-707.9, 710-711.9, 714-714.3, 714.8-714.9, 730.1, 732-732.9, 733.0-733.1, 740-749.0, 749.2-758.9, 759.0-759.8, 760.7, 775.1-775.3, 779.4-779.5, 788.0, 790.3, 798-798.0, E850, E860 |
| Neoplasms                                                                                                                          | C00-C13.9, C15-C22.8, C23-C25.9, C30-C34.9, C37-C38.8, C40-C41.9, C43-C45.9, C47-C54.9, C56-C57.8, C60-C63.8, C64-C67.9, C68.0-C68.8, C69.0-C69.8, C70-C73.9, C75-C75.8, C81-C86.6, C88-C91.0, C91.2-C91.3, C91.6, C92-C92.6, C93-C93.1, C93.3, C93.8, C94-C96.9, D00.1-D00.2, D01.0-D01.3, D02.0-D02.3, D03-D06.9, D07.0-D07.2, D07.4-D07.5, D09.0, D09.2-D09.3, D09.8, D10.0-D10.7, D11-D12.9, D13.0-D13.7, D14.0-D14.3, D15-D16.9, D22-D24.9, D26.0-D27.9, D28.0-D28.1, D28.7, D29.0-D29.8, D30.0-D30.8, D31-D36, D36.1-D36.7, D37.1-D37.5, D38.0-D38.5, D39.1-D39.2, D39.8, D40.0-D40.8, D41.0-D41.8, D42-D43.9, D44.0-D44.8, D45-D47.9, D48.0-D48.6, D49.2-D49.4, D49.6, K62.0-K62.1, K63.5, N60-N60.9, N84.0-N84.1, N87-N87.9                                                                                                                                                                                                                                                                                                                                                                                                                                                                                                                                                                                                                                                                                                                                                                                                                                                                                                                                                                                                                                                                                                                                                                                                                                                                                                                                                                                                                                                                                                                                                                                                                                                                                                                                                                                                                                                                                                                                                              | 140-148.9, 150-155.1, 155.3-158.9, 160-164.9, 170-175.9, 180-180.9, 182-183.8, 184.0-184.4, 184.8, 185-186.9, 187.1-187.8, 188-188.9, 189.0-189.8, 190-190.8, 191-193.9, 194.1-194.8, 200-204.0, 204.2, 205-205.3, 206-206.1, 207-208.9, 209.0-209.1, 209.4-209.5, 210.0-210.9, 211.0-211.8, 212.0-212.8, 213-213.9, 217-220.9, 221.0-221.8, 222.0-222.8, 223.0-223.8, 224-228.9, 229.0, 229.8, 230.1-230.8, 231.0-231.2, 232-232.9, 233.0-233.2, 233.4-233.5, 233.7, 234.0-234.8, 235.0, 235.4, 235.6-235.8, 236.1-236.2, 236.4-236.5, 236.7, 237-237.3, 237.5-237.9, 238.0-238.9, 239.2-239.4, 239.6, 569.0, 610-610.9, 622.1-622.2, 622.7                                                                                                                                                                                                                                                                                                                                                                                                                                                                                                                                                                                                                                                                                                                                                                                                                                                                                                                                                                                                                                                                                                                                                                                                                                                                                                                                                                                                                                                                |
| Lip and oral cavity cancer                                                                                                         | C00-C08.9, D10.0-D10.5, D11-D11.9                                                                                                                                                                                                                                                                                                                                                                                                                                                                                                                                                                                                                                                                                                                                                                                                                                                                                                                                                                                                                                                                                                                                                                                                                                                                                                                                                                                                                                                                                                                                                                                                                                                                                                                                                                                                                                                                                                                                                                                                                                                                                                                                                                                                                                                                                                                                                                                                                                                                                                                                                                                                                                                                | 140-145.9, 210.0-210.6, 235.0                                                                                                                                                                                                                                                                                                                                                                                                                                                                                                                                                                                                                                                                                                                                                                                                                                                                                                                                                                                                                                                                                                                                                                                                                                                                                                                                                                                                                                                                                                                                                                                                                                                                                                                                                                                                                                                                                                                                                                                                                                                                               |
| Nasopharynx cancer                                                                                                                 | C11-C11.9, D10.6                                                                                                                                                                                                                                                                                                                                                                                                                                                                                                                                                                                                                                                                                                                                                                                                                                                                                                                                                                                                                                                                                                                                                                                                                                                                                                                                                                                                                                                                                                                                                                                                                                                                                                                                                                                                                                                                                                                                                                                                                                                                                                                                                                                                                                                                                                                                                                                                                                                                                                                                                                                                                                                                                 | 147-147.9, 210.7-210.9                                                                                                                                                                                                                                                                                                                                                                                                                                                                                                                                                                                                                                                                                                                                                                                                                                                                                                                                                                                                                                                                                                                                                                                                                                                                                                                                                                                                                                                                                                                                                                                                                                                                                                                                                                                                                                                                                                                                                                                                                                                                                      |

List of International Classification of Diseases (ICD) codes mapped to the Global Burden of Disease cause list for causes of death

| Cause                                                                   | ICD10                                                                                                                                                                                                                                                                                                                                             | ICD9                                                                                                                                                                                                                                                                                                                                              |
|-------------------------------------------------------------------------|---------------------------------------------------------------------------------------------------------------------------------------------------------------------------------------------------------------------------------------------------------------------------------------------------------------------------------------------------|---------------------------------------------------------------------------------------------------------------------------------------------------------------------------------------------------------------------------------------------------------------------------------------------------------------------------------------------------|
| Other pharynx cancer                                                    | C09-C10.9, C12-C13.9, D10.7                                                                                                                                                                                                                                                                                                                       | 146-146.9, 148-148.9                                                                                                                                                                                                                                                                                                                              |
| Oesophageal cancer                                                      | C15-C15.9, D00.1, D13.0                                                                                                                                                                                                                                                                                                                           | 150-150.9, 211.0, 230.1                                                                                                                                                                                                                                                                                                                           |
| Stomach cancer                                                          | C16-C16.9, D00.2, D13.1, D37.1                                                                                                                                                                                                                                                                                                                    | 151-151.9, 211.1, 230.2                                                                                                                                                                                                                                                                                                                           |
| Colon and rectum cancer                                                 | C18-C21.9, D01.0-D01.3, D12-D12.9, D37.3-D37.5                                                                                                                                                                                                                                                                                                    | 153-154.9, 209.1, 209.5, 211.3-211.4, 230.3-230.6, 569.0                                                                                                                                                                                                                                                                                          |
| Liver cancer                                                            | C22-C22.8, D13.4                                                                                                                                                                                                                                                                                                                                  | 155-155.1, 155.3-155.9, 211.5                                                                                                                                                                                                                                                                                                                     |
| Liver cancer due to hepatitis B                                         |                                                                                                                                                                                                                                                                                                                                                   |                                                                                                                                                                                                                                                                                                                                                   |
| Liver cancer due to hepatitis C                                         |                                                                                                                                                                                                                                                                                                                                                   |                                                                                                                                                                                                                                                                                                                                                   |
| Liver cancer due to alcohol use                                         |                                                                                                                                                                                                                                                                                                                                                   |                                                                                                                                                                                                                                                                                                                                                   |
| Liver cancer due to NASH                                                |                                                                                                                                                                                                                                                                                                                                                   |                                                                                                                                                                                                                                                                                                                                                   |
| Hepatoblastoma                                                          | C22.2                                                                                                                                                                                                                                                                                                                                             |                                                                                                                                                                                                                                                                                                                                                   |
| Liver cancer due to other causes (internal)                             |                                                                                                                                                                                                                                                                                                                                                   |                                                                                                                                                                                                                                                                                                                                                   |
| Gallbladder and biliary tract cancer                                    | C23-C24.9, D13.5                                                                                                                                                                                                                                                                                                                                  | 156-156.9                                                                                                                                                                                                                                                                                                                                         |
| Pancreatic cancer                                                       | C25-C25.9, D13.6-D13.7                                                                                                                                                                                                                                                                                                                            | 157-157.9, 211.6-211.7                                                                                                                                                                                                                                                                                                                            |
| Larynx cancer                                                           | C32-C32.9, D02.0, D14.1, D38.0                                                                                                                                                                                                                                                                                                                    | 161-161.9, 212.1, 231.0, 235.6                                                                                                                                                                                                                                                                                                                    |
| Tracheal, bronchus, and lung cancer                                     | C33-C34.9, D02.1-D02.3, D14.2-D14.3, D38.1                                                                                                                                                                                                                                                                                                        | 162-162.9, 212.2-212.3, 231.1-231.2, 235.7                                                                                                                                                                                                                                                                                                        |
| Malignant skin melanoma                                                 | C43-C43.9, D03-D03.9, D22-D23.9, D48.5                                                                                                                                                                                                                                                                                                            | 172-172.9                                                                                                                                                                                                                                                                                                                                         |
| Non-melanoma skin cancer                                                | C44-C44.9, D04-D04.9, D49.2                                                                                                                                                                                                                                                                                                                       | 173-173.9, 222.4, 232-232.9, 238.2                                                                                                                                                                                                                                                                                                                |
| Non-melanoma skin cancer (squamous-cell carcinoma)                      | C44-C44.9, D04-D04.9, D49.2                                                                                                                                                                                                                                                                                                                       | 173-173.9, 222.4, 232-232.9, 238.2                                                                                                                                                                                                                                                                                                                |
| Soft tissue and other extrasosseous sarcomas                            | C49-C49.9                                                                                                                                                                                                                                                                                                                                         | 171-171.9                                                                                                                                                                                                                                                                                                                                         |
| Malignant neoplasm of bone and articular cartilage                      | C40-C41.9                                                                                                                                                                                                                                                                                                                                         | 170-170.9                                                                                                                                                                                                                                                                                                                                         |
| Breast cancer                                                           | C50-C50.9, D05-D05.9, D24-D24.9, D48.6, D49.3                                                                                                                                                                                                                                                                                                     | 174-175.9, 217-217.8, 233.0, 238.3, 239.3, 610-610.9                                                                                                                                                                                                                                                                                              |
| Cervical cancer                                                         | C53-C53.9, D06-D06.9, D26.0                                                                                                                                                                                                                                                                                                                       | 180-180.9, 219.0, 233.1, 622.1-622.2, 622.7                                                                                                                                                                                                                                                                                                       |
| Uterine cancer                                                          | C54-C54.9, D07.0-D07.2, D26.1-D26.9                                                                                                                                                                                                                                                                                                               | 182-182.9, 233.2                                                                                                                                                                                                                                                                                                                                  |
| Ovarian cancer                                                          | C56-C56.9, D27-D27.9, D39.1                                                                                                                                                                                                                                                                                                                       | 183-183.0, 220-220.9, 236.2                                                                                                                                                                                                                                                                                                                       |
| Prostate cancer                                                         | C61-C61.9, D07.5, D29.1, D40.0                                                                                                                                                                                                                                                                                                                    | 185-185.9, 222.2, 236.5                                                                                                                                                                                                                                                                                                                           |
| Testicular cancer                                                       | C62-C62.9, D29.2-D29.8, D40.1-D40.8                                                                                                                                                                                                                                                                                                               | 186-186.9, 222.0, 222.3, 236.4                                                                                                                                                                                                                                                                                                                    |
| Kidney cancer                                                           | C64-C65.9, D30.0-D30.1, D41.0-D41.1                                                                                                                                                                                                                                                                                                               | 189.0-189.1, 189.5-189.6, 223.0-223.1                                                                                                                                                                                                                                                                                                             |
| Bladder cancer                                                          | C67-C67.9, D09.0, D30.3, D41.4-D41.8, D49.4                                                                                                                                                                                                                                                                                                       | 188-188.9, 223.3, 233.7, 236.7, 239.4                                                                                                                                                                                                                                                                                                             |
| Brain and central nervous system cancer                                 | C70-C72.9                                                                                                                                                                                                                                                                                                                                         | 191-192.9                                                                                                                                                                                                                                                                                                                                         |
| Eye cancer                                                              | C69.0-C69.8                                                                                                                                                                                                                                                                                                                                       | 190-190.8                                                                                                                                                                                                                                                                                                                                         |
| Retinoblastoma                                                          | C69.2                                                                                                                                                                                                                                                                                                                                             | 190.5                                                                                                                                                                                                                                                                                                                                             |
| Other eye cancers                                                       | C69.0-C69.1, C69.3-C69.8                                                                                                                                                                                                                                                                                                                          | 190-190.4, 190.6-190.8                                                                                                                                                                                                                                                                                                                            |
| Neuroblastoma and other peripheral nervous cell tumors                  | C47-C47.9                                                                                                                                                                                                                                                                                                                                         |                                                                                                                                                                                                                                                                                                                                                   |
| Thyroid cancer                                                          | C73-C73.9, D09.3, D09.8, D34-D34.9, D44.0                                                                                                                                                                                                                                                                                                         | 193-193.9, 226-226.9                                                                                                                                                                                                                                                                                                                              |
| Mesothelioma                                                            | C45-C45.9                                                                                                                                                                                                                                                                                                                                         |                                                                                                                                                                                                                                                                                                                                                   |
| Hodgkin lymphoma                                                        | C81-C81.9                                                                                                                                                                                                                                                                                                                                         | 201-201.9                                                                                                                                                                                                                                                                                                                                         |
| Non-Hodgkin lymphoma                                                    | C82-C86.6, C96-C96.9                                                                                                                                                                                                                                                                                                                              | 200-200.9, 202-202.9                                                                                                                                                                                                                                                                                                                              |
| Burkitt lymphoma                                                        | C83.7-C83.8                                                                                                                                                                                                                                                                                                                                       | 200.2                                                                                                                                                                                                                                                                                                                                             |
| Other non-Hodgkin lymphoma                                              | C82-C83.6, C83.9-C86.6, C96-C96.9                                                                                                                                                                                                                                                                                                                 | 200-200.1, 200.3-200.9, 202-202.9                                                                                                                                                                                                                                                                                                                 |
| Multiple myeloma                                                        | C88-C90.9                                                                                                                                                                                                                                                                                                                                         | 203-203.9                                                                                                                                                                                                                                                                                                                                         |
| Leukaemia                                                               | C91-C91.0, C91.2-C91.3, C91.6, C92-C92.6, C93-C93.1, C93.3, C93.8, C94-C95.9                                                                                                                                                                                                                                                                      | 204-204.0, 204.2, 205-205.3, 206-206.1, 207-208.9                                                                                                                                                                                                                                                                                                 |
| Acute lymphoid leukaemia                                                | C91.0, C91.2-C91.3, C91.6                                                                                                                                                                                                                                                                                                                         | 204.0, 204.2                                                                                                                                                                                                                                                                                                                                      |
| Chronic lymphoid leukaemia                                              |                                                                                                                                                                                                                                                                                                                                                   |                                                                                                                                                                                                                                                                                                                                                   |
| Acute myeloid leukaemia                                                 | C92.0, C92.3-C92.6, C93.0, C94.0, C94.2, C94.4-C94.5                                                                                                                                                                                                                                                                                              | 205.0, 205.2-205.3, 206.0, 207.0, 207.2-207.8                                                                                                                                                                                                                                                                                                     |
| Chronic myeloid leukaemia                                               | C92.1-C92.2                                                                                                                                                                                                                                                                                                                                       | 205.1                                                                                                                                                                                                                                                                                                                                             |
| Other leukaemia                                                         | C93.1, C93.3, C93.8, C94.1, C94.3, C94.6-C95.9                                                                                                                                                                                                                                                                                                    | 206.1, 207.1, 207.9-208.9                                                                                                                                                                                                                                                                                                                         |
| Other malignant neoplasms (internal)                                    | C17-C17.9, C30-C31.9, C37-C38.8, C48-C48.9, C4A, C51-C52.9, C57-C57.8, C60-C60.9, C63-C63.8, C66-C66.9, C68.0-C68.8, C75-C75.8, D07.4, D09.2, D13.2-D13.3, D14.0, D15-D16.9, D28.0-D28.1, D28.7, D29.0, D30.2, D30.4-D30.8, D31-D31.9, D35-D35.2, D35.5-D36, D36.1-D36.7, D37.2, D38.2-D38.5, D39.2, D39.8, D41.2-D41.3, D44.1-D44.8, D48.0-D48.4 | 152-152.9, 158-158.9, 160-160.9, 163-164.9, 183.2-183.8, 184.0-184.4, 184.8, 187.1-187.8, 189.2-189.4, 189.8, 194.1-194.8, 209.0, 209.4, 211.2, 211.8, 212.0, 212.4-212.8, 213-213.9, 221.0-221.8, 222.1, 222.8, 223.2, 223.8, 224-224.9, 227-228.9, 229.0, 229.8, 230.7-230.8, 233.4-233.5, 234.0-234.8, 235.4, 235.8, 236.1, 238.0-238.1, 239.2 |
| Other neoplasms                                                         | D32-D33.9, D35.3-D35.4, D42-D43.9, D45-D47.9, D49.6, K62.0-K62.1, K63.5, N60-N60.9, N84.0-N84.1, N87-N87.9                                                                                                                                                                                                                                        | 225-225.9, 237-237.3, 237.5-237.9, 238.4-238.9, 239.6                                                                                                                                                                                                                                                                                             |
| Myelodysplastic, myeloproliferative, and other haematopoietic neoplasms | D45-D47.9                                                                                                                                                                                                                                                                                                                                         | 238.4-238.9                                                                                                                                                                                                                                                                                                                                       |
| Cardiovascular diseases                                                 | B33.2, G45-G46.8, I01-I01.9, I02.0, I05-I09.9, I11-I11.9, I20-I25.9, I27.0, I27.2, I28-I28.9, I30-I31.1, I31.8-I37.8, I38-I41.9, I42.1-I42.8, I43-I43.9, I47-I48.9, I51.0-I51.4, I60-I63.9, I65-I66.9, I67.0-I67.3, I67.5-I67.6, I68.0-I68.2, I69.0-I69.3, I70.2-I70.8, I71-I73.9, I77-I83.9, I86-I89.0, I89.9, I98, K75.1                        | 036.4, 391-391.9, 392.0, 393-398.9, 402-402.9, 410-414.9, 416.0, 417-417.9, 420-423.9, 423.1-423.9, 424.0-424.3, 424.8, 425.0-425.3, 425.5, 425.7-425.8, 427.0-427.3, 427.6-427.8, 429.0, 430-435.9, 437.0-437.2, 437.5-437.8, 440.2, 440.4, 441-443.9, 447-454.9, 456, 456.3-457, 457.1, 457.8-457.9, 459, 459.1-459.3                           |
| Rheumatic heart disease                                                 | I01-I01.9, I02.0, I05-I09.9                                                                                                                                                                                                                                                                                                                       | 391-391.9, 392.0, 393-398.9                                                                                                                                                                                                                                                                                                                       |
| Ischaemic heart disease                                                 | I20-I25.9                                                                                                                                                                                                                                                                                                                                         | 410-414.9                                                                                                                                                                                                                                                                                                                                         |
| Stroke                                                                  | G45-G46.8, I60-I63.9, I65-I66.9, I67.0-I67.3, I67.5-I67.6, I68.1-I68.2, I69.0-I69.3                                                                                                                                                                                                                                                               | 430-435.9, 437.0-437.2, 437.5-437.8                                                                                                                                                                                                                                                                                                               |
| Ischaemic stroke                                                        | G45-G46.8, I63-I63.9, I65-I66.9, I67.2-I67.3, I67.5-I67.6, I69.3                                                                                                                                                                                                                                                                                  | 433-435.9, 437.0-437.1, 437.5-437.8                                                                                                                                                                                                                                                                                                               |
| Intracerebral haemorrhage                                               | I61-I62, I62.1-I62.9, I68.1-I68.2, I69.1-I69.2                                                                                                                                                                                                                                                                                                    | 431-432.9, 437.2                                                                                                                                                                                                                                                                                                                                  |
| Subarachnoid hemorrhage                                                 | I60-I60.9, I62.0, I67.0-I67.1, I69.0                                                                                                                                                                                                                                                                                                              | 430-430.9                                                                                                                                                                                                                                                                                                                                         |
| Hypertensive heart disease                                              | I11-I11.9                                                                                                                                                                                                                                                                                                                                         | 402-402.9                                                                                                                                                                                                                                                                                                                                         |
| Non-rheumatic valvular heart disease                                    | I34-I37.8                                                                                                                                                                                                                                                                                                                                         | 424.0-424.3, 424.8                                                                                                                                                                                                                                                                                                                                |
| Non-rheumatic calcific aortic valvular heart disease                    | I35-I35.9                                                                                                                                                                                                                                                                                                                                         | 424.1                                                                                                                                                                                                                                                                                                                                             |
| Non-rheumatic degenerative mitral valvular heart disease                | I34-I34.9                                                                                                                                                                                                                                                                                                                                         | 424.0                                                                                                                                                                                                                                                                                                                                             |
| Other non-rheumatic valvular heart diseases                             | I36-I37.8                                                                                                                                                                                                                                                                                                                                         | 424.2-424.3, 424.8                                                                                                                                                                                                                                                                                                                                |
| Cardiomyopathy and myocarditis                                          | B33.2, I40-I41.9, I42.1-I42.8, I43-I43.9, I51.4                                                                                                                                                                                                                                                                                                   | 422-422.9, 425.0-425.3, 425.5, 425.7-425.8, 429.0                                                                                                                                                                                                                                                                                                 |
| Myocarditis                                                             | B33.2, I40-I41.9, I51.4                                                                                                                                                                                                                                                                                                                           | 422-422.9                                                                                                                                                                                                                                                                                                                                         |
| Alcoholic cardiomyopathy                                                | I42.6                                                                                                                                                                                                                                                                                                                                             | 425.5                                                                                                                                                                                                                                                                                                                                             |
| Other cardiomyopathy                                                    | I42.1-I42.5, I42.7-I42.8, I43-I43.9                                                                                                                                                                                                                                                                                                               | 425.0-425.3, 425.7-425.8, 429.0                                                                                                                                                                                                                                                                                                                   |
| Pulmonary arterial hypertension                                         | I27.0, I27.2                                                                                                                                                                                                                                                                                                                                      | 416.0                                                                                                                                                                                                                                                                                                                                             |

| List of International Classification of Diseases (ICD) codes mapped to the Global Burden of Disease cause list for causes of death |                                                                                                                                                                                                                                                                                                                        |                                                                                                                                                                                                                                                                                                    |
|------------------------------------------------------------------------------------------------------------------------------------|------------------------------------------------------------------------------------------------------------------------------------------------------------------------------------------------------------------------------------------------------------------------------------------------------------------------|----------------------------------------------------------------------------------------------------------------------------------------------------------------------------------------------------------------------------------------------------------------------------------------------------|
| Cause                                                                                                                              | ICD10                                                                                                                                                                                                                                                                                                                  | ICD9                                                                                                                                                                                                                                                                                               |
| Atrial fibrillation and flutter                                                                                                    | I48-I48.9                                                                                                                                                                                                                                                                                                              | 427.3                                                                                                                                                                                                                                                                                              |
| Aortic aneurysm                                                                                                                    | I71-I71.9                                                                                                                                                                                                                                                                                                              | 441-441.9                                                                                                                                                                                                                                                                                          |
| Peripheral artery disease                                                                                                          | I70.2-I70.8, I73-I73.9                                                                                                                                                                                                                                                                                                 | 440.2, 440.4, 443.0-443.9                                                                                                                                                                                                                                                                          |
| Endocarditis                                                                                                                       | I33-I33.9, I38-I39.9                                                                                                                                                                                                                                                                                                   | 421-421.9                                                                                                                                                                                                                                                                                          |
| Other cardiovascular and circulatory diseases (internal)                                                                           | I28-I28.9, I30-I31.1, I31.8-I32.8, I47-I47.9, I51.0-I51.3, I68.0, I72-I72.9, I77-I83.9, I86-I89.0, I89.9, I98, K75.1                                                                                                                                                                                                   | 036.4, 417-417.9, 420-420.9, 423, 423.1-423.9, 427.0-427.2, 427.6-427.8, 442-443, 447-454.9, 456, 456.3-457, 457.1, 457.8-457.9, 459, 459.1-459.3                                                                                                                                                  |
| Chronic respiratory diseases                                                                                                       | D86-D86.2, D86.9, G47.3, J30-J35.9, J37-J39.9, J41-J46.9, J60-J63.8, J65-J68.9, J70, J70.8-J70.9, J82, J84-J84.9, J91, J91.8-J92.9                                                                                                                                                                                     | 135-135.9, 327.2-327.8, 470, 470.9-474.9, 476-476.1, 477-479, 491-493.9, 495-504.9, 506-506.9, 508-509, 515, 516-517.8, 518.6, 518.9, 519.1-519.4                                                                                                                                                  |
| Chronic obstructive pulmonary disease                                                                                              | J41-J44.9                                                                                                                                                                                                                                                                                                              | 491-492.9, 496-499                                                                                                                                                                                                                                                                                 |
| Pneumoconiosis                                                                                                                     | J60-J63.8, J65-J65.0, J92.0                                                                                                                                                                                                                                                                                            | 500-504.9                                                                                                                                                                                                                                                                                          |
| Silicosis                                                                                                                          | J62-J62.9                                                                                                                                                                                                                                                                                                              | 502-502.9, 503.0, 503.9                                                                                                                                                                                                                                                                            |
| Asbestosis                                                                                                                         | J61-J61.0, J92.0                                                                                                                                                                                                                                                                                                       | 501                                                                                                                                                                                                                                                                                                |
| Coal workers pneumoconiosis                                                                                                        | J60-J60.0                                                                                                                                                                                                                                                                                                              | 500-500.9, 501.0-501.9                                                                                                                                                                                                                                                                             |
| Other pneumoconiosis                                                                                                               | J63-J63.8, J65-J65.0                                                                                                                                                                                                                                                                                                   | 503, 503.1, 504-504.9                                                                                                                                                                                                                                                                              |
| Asthma                                                                                                                             | J45-J46.9                                                                                                                                                                                                                                                                                                              | 493-493.9                                                                                                                                                                                                                                                                                          |
| Interstitial lung disease and pulmonary sarcoidosis                                                                                | D86-D86.2, D86.9, J84-J84.9                                                                                                                                                                                                                                                                                            | 135-135.9, 515, 516-516.9                                                                                                                                                                                                                                                                          |
| Other chronic respiratory diseases                                                                                                 | G47.3, J30-J35.9, J37-J39.9, J66-J68.9, J70, J70.8-J70.9, J82, J91, J91.8-J92, J92.9                                                                                                                                                                                                                                   | 327.2-327.8, 470, 470.9-474.9, 476-476.1, 477-479, 495-495.9, 506-506.9, 508-509, 517-517.8, 518.6, 518.9, 519.1-519.4                                                                                                                                                                             |
| Digestive diseases                                                                                                                 | B18-B18.9, I84-I85.9, I98.2, K20-K20.9, K22-K22.6, K22.8-K29.9, K31-K31.8, K35-K38.9, K40-K42.9, K44-K46.9, K50-K52, K52.2-K52.9, K55-K62, K62.2-K62.6, K62.8-K62.9, K64-K64.9, K66.8, K67, K68, K70-K70.3, K71.7, K73-K75, K75.2, K75.4-K76.2, K76.4-K77, K77.8, K80-K83.9, K85-K86.9, K90-K90.9, K92.8, K93.8, M09.1 | 455-455.9, 456.0-456.2, 530-530.0, 530.2-530.6, 531-536.1, 537-537.6, 537.8, 538, 540-543.9, 550-551.1, 551.3-552.1, 552.3-553.6, 555-558.9, 560-560.3, 560.8-560.9, 562-562.1, 564-564.1, 564.5-564.7, 565-566.9, 569.1-569.5, 569.7, 571-571.9, 572.2-573.0, 573.4-577.9, 579-579.2, 579.4-579.9 |
| Cirrhosis and other chronic liver diseases                                                                                         | B18-B18.9, I85-I85.9, I98.2, K70-K70.3, K71.7, K73-K75, K75.2, K75.4-K76.2, K76.4-K76.9, K77.8                                                                                                                                                                                                                         | 456.0-456.2, 571-571.9, 572.2-573.0, 573.4-573.9                                                                                                                                                                                                                                                   |
| Cirrhosis and other chronic liver diseases due to hepatitis B                                                                      |                                                                                                                                                                                                                                                                                                                        |                                                                                                                                                                                                                                                                                                    |
| Cirrhosis and other chronic liver diseases due to hepatitis C                                                                      |                                                                                                                                                                                                                                                                                                                        |                                                                                                                                                                                                                                                                                                    |
| Cirrhosis and other chronic liver diseases due to alcohol use                                                                      |                                                                                                                                                                                                                                                                                                                        |                                                                                                                                                                                                                                                                                                    |
| Cirrhosis and other chronic liver diseases due to NAFLD                                                                            |                                                                                                                                                                                                                                                                                                                        |                                                                                                                                                                                                                                                                                                    |
| Cirrhosis and other chronic liver diseases due to other causes                                                                     |                                                                                                                                                                                                                                                                                                                        |                                                                                                                                                                                                                                                                                                    |
| Upper digestive system diseases                                                                                                    | K25-K29.9                                                                                                                                                                                                                                                                                                              | 531-535.9                                                                                                                                                                                                                                                                                          |
| Peptic ulcer disease                                                                                                               | K25-K28.9                                                                                                                                                                                                                                                                                                              | 531-534.9                                                                                                                                                                                                                                                                                          |
| Gastritis and duodenitis                                                                                                           | K29-K29.9                                                                                                                                                                                                                                                                                                              | 535-535.9                                                                                                                                                                                                                                                                                          |
| Appendicitis                                                                                                                       | K35-K37.9, K38.3-K38.9                                                                                                                                                                                                                                                                                                 | 540-542.9                                                                                                                                                                                                                                                                                          |
| Paralytic ileus and intestinal obstruction                                                                                         | K56-K56.9                                                                                                                                                                                                                                                                                                              | 560-560.3, 560.8-560.9                                                                                                                                                                                                                                                                             |
| Inguinal, femoral, and abdominal hernia                                                                                            | K40-K42.9, K44-K46.9                                                                                                                                                                                                                                                                                                   | 550-551.1, 551.3-552.1, 552.3-553.0, 553.6                                                                                                                                                                                                                                                         |
| Inflammatory bowel disease                                                                                                         | K50-K52, K52.8-K52.9, M09.1                                                                                                                                                                                                                                                                                            | 555-556.9, 558-558.9, 569.5                                                                                                                                                                                                                                                                        |
| Vascular intestinal disorders                                                                                                      | K55-K55.9                                                                                                                                                                                                                                                                                                              | 557-557.9                                                                                                                                                                                                                                                                                          |
| Gallbladder and biliary diseases                                                                                                   | K80-K83.9                                                                                                                                                                                                                                                                                                              | 574-576.9                                                                                                                                                                                                                                                                                          |
| Pancreatitis                                                                                                                       | K85-K86.9                                                                                                                                                                                                                                                                                                              | 577-577.9, 579.4                                                                                                                                                                                                                                                                                   |
| Other digestive diseases                                                                                                           | I84-I84.9, K20-K20.9, K22-K22.6, K22.8-K24, K31-K31.8, K38-K38.2, K52.2-K52.3, K57-K62, K62.2-K62.6, K62.8-K62.9, K64-K64.9, K66.8, K67, K68, K77, K90-K90.9, K92.8, K93.8                                                                                                                                             | 455-455.9, 530-530.0, 530.2-530.6, 536-536.1, 537-537.6, 537.8, 538, 543-543.9, 553.1-553.3, 562-562.1, 564-564.1, 564.5-564.7, 565-566.9, 569.1-569.4, 569.7, 579-579.2, 579.8-579.9                                                                                                              |
| Neurological disorders                                                                                                             | F00-F02.0, F02.2-F02.3, F02.8-F03.9, G10-G13.8, G20-G20.9, G23-G24, G24.1-G25.0, G25.2-G25.3, G25.5, G25.8-G26.0, G30-G31.1, G31.8-G31.9, G35-G37.9, G40-G41.9, G61-G61.9, G70-G71.1, G71.3-G72, G72.2-G73.7, G90-G90.9, G95-G95.9, M33-M33.9                                                                          | 290-290.9, 294.1-294.9, 330-331.2, 331.5-332.0, 333-337.9, 340-341.9, 345-345.9, 349, 349.2-349.8, 353.8-353.9, 356-356.9, 357.0-357.1, 357.3-357.4, 357.7, 358-359.9, 775.2                                                                                                                       |
| Alzheimer's disease and other dementias                                                                                            | F00-F02.0, F02.8-F03.9, G30-G31.1, G31.8-G31.9                                                                                                                                                                                                                                                                         | 290-290.9, 294.1-294.9, 331-331.2                                                                                                                                                                                                                                                                  |
| Parkinson's disease                                                                                                                | F02.3, G20-G20.9                                                                                                                                                                                                                                                                                                       | 332-332.0                                                                                                                                                                                                                                                                                          |
| Idiopathic epilepsy                                                                                                                | G40-G41.9                                                                                                                                                                                                                                                                                                              | 345-345.9                                                                                                                                                                                                                                                                                          |
| Multiple sclerosis                                                                                                                 | G35-G35.9                                                                                                                                                                                                                                                                                                              | 340-340.9                                                                                                                                                                                                                                                                                          |
| Motor neuron disease                                                                                                               | G12.2-G12.9                                                                                                                                                                                                                                                                                                            | 335-335.2, 335.8-335.9                                                                                                                                                                                                                                                                             |
| Other neurological disorders                                                                                                       | F02.2, G10-G12.1, G13-G13.8, G23-G24, G24.1-G25.0, G25.2-G25.3, G25.5, G25.8-G26.0, G36-G37.9, G61-G61.9, G70-G71.1, G71.3-G72, G72.2-G73.7, G90-G90.9, G95-G95.9, M33-M33.9                                                                                                                                           | 330-330.9, 331.5-331.9, 333-334.9, 335.3, 336-337.9, 341-341.9, 349, 349.2-349.8, 353.8-353.9, 356-356.9, 357.0-357.1, 357.3-357.4, 357.7, 358-359.9, 775.2                                                                                                                                        |
| Mental disorders                                                                                                                   | F24, F50.0-F50.5                                                                                                                                                                                                                                                                                                       | 307.1                                                                                                                                                                                                                                                                                              |
| Eating disorders                                                                                                                   | F50.0-F50.5                                                                                                                                                                                                                                                                                                            | 307.1                                                                                                                                                                                                                                                                                              |
| Anorexia nervosa                                                                                                                   | F50.0-F50.1                                                                                                                                                                                                                                                                                                            | 307.1                                                                                                                                                                                                                                                                                              |
| Bulimia nervosa                                                                                                                    | F50.2-F50.5                                                                                                                                                                                                                                                                                                            |                                                                                                                                                                                                                                                                                                    |
| Substance use disorders                                                                                                            | E24.4, F10-F16.9, F18-F18.9, G31.2, G62.1, G72.1, P04.3-P04.4, P96.1, Q86.0, R78.0-R78.5, X45-X45.9, X65-X65.9, Y15-Y15.9                                                                                                                                                                                              | 291-292.9, 303-303.9, 304.0-304.8, 305.0, 305.2-305.8, 357.5, 760.7, 790.3, E850, E860                                                                                                                                                                                                             |
| Alcohol use disorders                                                                                                              | E24.4, F10-F10.9, G31.2, G62.1, G72.1, P04.3, Q86.0, R78.0, X45-X45.9, X65-X65.9, Y15-Y15.9                                                                                                                                                                                                                            | 291-291.9, 303-303.9, 305.0, 357.5, 790.3, E860                                                                                                                                                                                                                                                    |
| Drug use disorders                                                                                                                 | F11-F16.9, F18-F18.9, P04.4, P96.1, R78.1-R78.5                                                                                                                                                                                                                                                                        | 292-292.9, 304.0-304.8, 305.2-305.8, 760.7, E850                                                                                                                                                                                                                                                   |
| Opioid use disorders                                                                                                               | F11-F11.9, P96.1, R78.1                                                                                                                                                                                                                                                                                                | 304.0, 305.5                                                                                                                                                                                                                                                                                       |
| Cocaine use disorders                                                                                                              | F14-F14.9, R78.2                                                                                                                                                                                                                                                                                                       | 304.2, 305.6                                                                                                                                                                                                                                                                                       |
| Amphetamine use disorders                                                                                                          | F15-F15.9                                                                                                                                                                                                                                                                                                              | 304.4, 305.7                                                                                                                                                                                                                                                                                       |
| Other drug use disorders                                                                                                           | F13-F13.9, F16-F16.9, F18-F18.9, P04.4, R78.3-R78.5                                                                                                                                                                                                                                                                    | 292-292.9, 304.1, 304.5-304.8, 305.3-305.4, 305.8, 760.7                                                                                                                                                                                                                                           |
| Diabetes and kidney diseases                                                                                                       | D63.1, E10-E11.9, I12-I13.9, N00-N08.8, N15.0, N18-N18.9, P70.2, Q61-Q62.8                                                                                                                                                                                                                                             | 403-404.9, 580-583.9, 585-585.9, 589-589.9, 753-753.3, 775.1                                                                                                                                                                                                                                       |
| Diabetes mellitus                                                                                                                  | E10-E10.1, E10.3-E11.1, E11.3-E11.9, P70.2                                                                                                                                                                                                                                                                             | 775.1                                                                                                                                                                                                                                                                                              |
| Diabetes mellitus type 1                                                                                                           | E10-E10.1, E10.3-E10.9, P70.2                                                                                                                                                                                                                                                                                          | 775.1                                                                                                                                                                                                                                                                                              |
| Diabetes mellitus type 2                                                                                                           | E11-E11.1, E11.3-E11.9                                                                                                                                                                                                                                                                                                 |                                                                                                                                                                                                                                                                                                    |
| Chronic kidney disease                                                                                                             | D63.1, E10.2, E11.2, I12-I13.9, N02-N08.8, N15.0, N18-N18.9, Q61-Q62.8                                                                                                                                                                                                                                                 | 403-404.9, 581-583.9, 585-585.9, 589-589.9, 753-753.3                                                                                                                                                                                                                                              |
| Chronic kidney disease due to diabetes mellitus type 1                                                                             | E10.2                                                                                                                                                                                                                                                                                                                  |                                                                                                                                                                                                                                                                                                    |
| Chronic kidney disease due to diabetes mellitus type 2                                                                             | E11.2                                                                                                                                                                                                                                                                                                                  |                                                                                                                                                                                                                                                                                                    |
| Chronic kidney disease due to hypertension                                                                                         | I12-I13.9                                                                                                                                                                                                                                                                                                              | 403-404.9                                                                                                                                                                                                                                                                                          |
| Chronic kidney disease due to glomerulonephritis                                                                                   | N03-N06.9                                                                                                                                                                                                                                                                                                              | 581-583.9                                                                                                                                                                                                                                                                                          |
| Chronic kidney disease due to other and unspecified causes                                                                         | N02-N02.9, N07-N08.8, N15.0, Q61-Q62.8                                                                                                                                                                                                                                                                                 | 589-589.9, 753-753.3                                                                                                                                                                                                                                                                               |

| List of International Classification of Diseases (ICD) codes mapped to the Global Burden of Disease cause list for causes of death |                                                                                                                                                                                                                                                                                                                                                                                                                                                                                                                                                                                                                                                                                                                                                                                                                                                                                              |                                                                                                                                                                                                                                                                                                                                                                                                                                                                                                                                 |
|------------------------------------------------------------------------------------------------------------------------------------|----------------------------------------------------------------------------------------------------------------------------------------------------------------------------------------------------------------------------------------------------------------------------------------------------------------------------------------------------------------------------------------------------------------------------------------------------------------------------------------------------------------------------------------------------------------------------------------------------------------------------------------------------------------------------------------------------------------------------------------------------------------------------------------------------------------------------------------------------------------------------------------------|---------------------------------------------------------------------------------------------------------------------------------------------------------------------------------------------------------------------------------------------------------------------------------------------------------------------------------------------------------------------------------------------------------------------------------------------------------------------------------------------------------------------------------|
| Cause                                                                                                                              | ICD10                                                                                                                                                                                                                                                                                                                                                                                                                                                                                                                                                                                                                                                                                                                                                                                                                                                                                        | ICD9                                                                                                                                                                                                                                                                                                                                                                                                                                                                                                                            |
| Acute glomerulonephritis                                                                                                           | N00-N01.9                                                                                                                                                                                                                                                                                                                                                                                                                                                                                                                                                                                                                                                                                                                                                                                                                                                                                    | 580-580.9                                                                                                                                                                                                                                                                                                                                                                                                                                                                                                                       |
| Skin and subcutaneous diseases                                                                                                     | A46-A46.0, A66-A67.9, B86, D86.3, I89.1-I89.8, L00-L05.9, L08-L08.9, L10-L14.0, L51-L51.9, L88-L89.9, L97-L98.4, M72.5-M72.6                                                                                                                                                                                                                                                                                                                                                                                                                                                                                                                                                                                                                                                                                                                                                                 | 035-035.9, 102-103.9, 133-133.6, 457.2-457.3, 680-689, 694-695.3, 707-707.9                                                                                                                                                                                                                                                                                                                                                                                                                                                     |
| Bacterial skin diseases                                                                                                            | A46-A46.0, A66-A67.9, I89.1-I89.8, L00-L05.9, L08-L08.9, L88, L97-L98.4, M72.5-M72.6                                                                                                                                                                                                                                                                                                                                                                                                                                                                                                                                                                                                                                                                                                                                                                                                         | 035-035.9, 102-103.9, 457.2-457.3, 680-689                                                                                                                                                                                                                                                                                                                                                                                                                                                                                      |
| Cellulitis                                                                                                                         | L03-L03.9, M72.5-M72.6                                                                                                                                                                                                                                                                                                                                                                                                                                                                                                                                                                                                                                                                                                                                                                                                                                                                       | 681-682.9                                                                                                                                                                                                                                                                                                                                                                                                                                                                                                                       |
| Pyoderma                                                                                                                           | A46-A46.0, A66-A67.9, I89.1-I89.8, L00-L02.9, L04-L05.9, L08-L08.9, L88, L97-L98.4                                                                                                                                                                                                                                                                                                                                                                                                                                                                                                                                                                                                                                                                                                                                                                                                           | 035-035.9, 102-103.9, 457.2-457.3, 680-680.9, 683-689                                                                                                                                                                                                                                                                                                                                                                                                                                                                           |
| Decubitus ulcer                                                                                                                    | L89-L89.9                                                                                                                                                                                                                                                                                                                                                                                                                                                                                                                                                                                                                                                                                                                                                                                                                                                                                    | 707-707.9                                                                                                                                                                                                                                                                                                                                                                                                                                                                                                                       |
| Other skin and subcutaneous diseases                                                                                               | D86.3, L10-L14.0, L51-L51.9                                                                                                                                                                                                                                                                                                                                                                                                                                                                                                                                                                                                                                                                                                                                                                                                                                                                  | 694-695.3                                                                                                                                                                                                                                                                                                                                                                                                                                                                                                                       |
| Musculoskeletal disorders                                                                                                          | I27.1, I67.7, L93-L93.2, M00-M03.0, M03.2-M03.6, M05-M09.0, M09.2-M09.8, M30-M32.9, M34-M36.8, M40-M43.1, M65-M65.0, M71.0-M71.1, M80-M82.8, M86.3-M86.4, M87-M87.0, M88-M89.0, M89.5, M89.7-M89.9                                                                                                                                                                                                                                                                                                                                                                                                                                                                                                                                                                                                                                                                                           | 416.1, 437.4, 446-446.9, 695.4-695.5, 710-711.9, 714-714.3, 714.8-714.9, 730.1, 732-732.9, 733.0-733.1                                                                                                                                                                                                                                                                                                                                                                                                                          |
| Rheumatoid arthritis                                                                                                               | M05-M06.9, M08.0-M08.8                                                                                                                                                                                                                                                                                                                                                                                                                                                                                                                                                                                                                                                                                                                                                                                                                                                                       | 714-714.3, 714.8-714.9                                                                                                                                                                                                                                                                                                                                                                                                                                                                                                          |
| Other musculoskeletal disorders                                                                                                    | I27.1, I67.7, L93-L93.2, M00-M03.0, M03.2-M03.6, M07-M08, M08.9-M09.0, M09.2-M09.8, M30-M32.9, M34-M36.8, M40-M43.1, M65-M65.0, M71.0-M71.1, M80-M82.8, M86.3-M86.4, M87-M87.0, M88-M89.0, M89.5, M89.7-M89.9                                                                                                                                                                                                                                                                                                                                                                                                                                                                                                                                                                                                                                                                                | 416.1, 437.4, 446-446.9, 695.4-695.5, 710-711.9, 730.1, 732-732.9, 733.0-733.1                                                                                                                                                                                                                                                                                                                                                                                                                                                  |
| Other non-communicable diseases                                                                                                    | D25-D26, D28.2, D52.1, D55-D58.9, D59.0-D59.3, D59.5-D59.6, D60-D61.9, D64.0, D66-D67, D68.0-D69.8, D70-D70.2, D70.4-D75.8, D76-D78.8, D86.8, D89-D89.2, E03-E07.1, E09-E09.9, E15.0, E16.0-E16.9, E20-E24.3, E24.8-E34, E34.1-E34.8, E36-E36.8, E65-E68, E70-E85.2, E88-E89.9, G21.0-G21.1, G24.0, G25.1, G25.4, G25.6-G25.7, G71.2, G72.0, G93.7, G97-G97.9, I95.2-I95.3, I97-I97.9, I98.9, J70.0-J70.5, J95-J95.9, K43-K43.9, K52.0, K62.7, K91-K91.9, K94-K95.8, M87.1, N10-N12.9, N13.6, N14-N15, N15.1-N16.8, N20-N23.0, N25-N28.1, N29-N30.3, N30.8-N32.0, N32.3-N32.4, N34-N34.3, N36-N36.9, N39-N39.2, N41-N41.9, N44-N44.0, N45-N45.9, N49-N49.9, N65-N65.1, N72-N72.0, N75-N77.8, N80-N81.9, N83-N83.9, N99-N99.9, P96.0, P96.2, P96.5, Q00-Q07.9, Q10.4-Q18.9, Q20-Q28.9, Q30-Q36, Q37-Q45.9, Q50-Q60.6, Q63-Q86, Q86.1-Q87.8, Q89-Q89.8, Q90-Q93.9, Q95-Q99.8, R50.2, R95-R95.9 | 218-219, 219.1-219.9, 236.0, 240-243.9, 244.0-244.1, 244.3-244.8, 245-246.9, 251-259.1, 259.3-259.9, 270-273.9, 275-276, 277-277.2, 277.4-277.9, 278.0-278.8, 282-284.9, 286-286.5, 286.7-289.0, 289.4-289.7, 357.6, 518.7, 519.0, 536.4, 539-539.9, 551.2, 552.2, 564.2-564.4, 569.6, 579.3, 588-588.9, 590-590.9, 592-593.8, 594-599.6, 599.8, 601-602.9, 604-604.9, 608.2, 617-618.9, 620-620.9, 621.4-621.9, 622.3-622.6, 629-629.8, 740-749.0, 749.2-752.9, 753.4-758.9, 759.0-759.8, 775.3, 779.4-779.5, 788.0, 798-798.0 |
| Congenital birth defects                                                                                                           | G71.2, P96.0, Q00-Q07.9, Q10.4-Q18.9, Q20-Q28.9, Q30-Q36, Q37-Q45.9, Q50-Q60.6, Q63-Q86, Q86.1-Q87.8, Q89-Q89.8, Q90-Q93.9, Q95-Q99.8                                                                                                                                                                                                                                                                                                                                                                                                                                                                                                                                                                                                                                                                                                                                                        | 740-749.0, 749.2-752.9, 753.4-758.9, 759.0-759.8                                                                                                                                                                                                                                                                                                                                                                                                                                                                                |
| Neural tube defects                                                                                                                | Q00-Q01.9, Q05-Q05.9                                                                                                                                                                                                                                                                                                                                                                                                                                                                                                                                                                                                                                                                                                                                                                                                                                                                         | 740-741.9, 742.0                                                                                                                                                                                                                                                                                                                                                                                                                                                                                                                |
| Congenital heart anomalies                                                                                                         | Q20-Q28.9                                                                                                                                                                                                                                                                                                                                                                                                                                                                                                                                                                                                                                                                                                                                                                                                                                                                                    | 745-747.9                                                                                                                                                                                                                                                                                                                                                                                                                                                                                                                       |
| Orofacial clefts                                                                                                                   | Q35-Q36, Q37-Q37.9                                                                                                                                                                                                                                                                                                                                                                                                                                                                                                                                                                                                                                                                                                                                                                                                                                                                           | 749-749.0, 749.2-749.9                                                                                                                                                                                                                                                                                                                                                                                                                                                                                                          |
| Down syndrome                                                                                                                      | Q90-Q90.9                                                                                                                                                                                                                                                                                                                                                                                                                                                                                                                                                                                                                                                                                                                                                                                                                                                                                    | 758.0                                                                                                                                                                                                                                                                                                                                                                                                                                                                                                                           |
| Other chromosomal abnormalities                                                                                                    | Q87-Q87.8, Q91-Q93.9, Q95-Q95.9, Q97-Q97.9, Q99-Q99.8                                                                                                                                                                                                                                                                                                                                                                                                                                                                                                                                                                                                                                                                                                                                                                                                                                        | 758, 758.1-758.6, 758.8-758.9                                                                                                                                                                                                                                                                                                                                                                                                                                                                                                   |
| Congenital musculoskeletal and limb anomalies                                                                                      | Q65-Q79, Q79.6-Q79.9                                                                                                                                                                                                                                                                                                                                                                                                                                                                                                                                                                                                                                                                                                                                                                                                                                                                         | 742.5, 754-756.5, 756.8-756.9                                                                                                                                                                                                                                                                                                                                                                                                                                                                                                   |
| Urogenital congenital anomalies                                                                                                    | P96.0, Q50-Q60.6, Q63-Q64.9                                                                                                                                                                                                                                                                                                                                                                                                                                                                                                                                                                                                                                                                                                                                                                                                                                                                  | 752-752.9, 753.4-753.9                                                                                                                                                                                                                                                                                                                                                                                                                                                                                                          |
| Digestive congenital anomalies                                                                                                     | Q38-Q45.9, Q79.0-Q79.5                                                                                                                                                                                                                                                                                                                                                                                                                                                                                                                                                                                                                                                                                                                                                                                                                                                                       | 750-751.9, 756.6-756.7                                                                                                                                                                                                                                                                                                                                                                                                                                                                                                          |
| Other congenital birth defects                                                                                                     | G71.2, Q02-Q04.9, Q06-Q07.9, Q10.4-Q18.9, Q30-Q34.9, Q80-Q86, Q86.1-Q86.8, Q89-Q89.8                                                                                                                                                                                                                                                                                                                                                                                                                                                                                                                                                                                                                                                                                                                                                                                                         | 742, 742.1-742.4, 742.8-744.9, 748-748.9, 757-757.9, 759.0-759.8                                                                                                                                                                                                                                                                                                                                                                                                                                                                |
| Urinary diseases and male infertility                                                                                              | N10-N12.9, N13.6, N15, N15.1-N16.8, N20-N23.0, N25-N28.1, N29-N30.3, N30.8-N32.0, N32.3-N32.4, N34-N34.3, N36-N36.9, N39-N39.2, N41-N41.9, N44-N44.0, N45-N45.9, N49-N49.9                                                                                                                                                                                                                                                                                                                                                                                                                                                                                                                                                                                                                                                                                                                   | 588-588.9, 590-590.9, 592-593.8, 594-598.1, 598.8-599.6, 599.8, 601-602.9, 604-604.9, 608.2, 788.0                                                                                                                                                                                                                                                                                                                                                                                                                              |
| Urinary tract infection and interstitial nephritis                                                                                 | N10-N12.9, N13.6, N15, N15.1-N16.8, N30-N30.3, N30.8-N30.9, N34-N34.3, N39.0-N39.2                                                                                                                                                                                                                                                                                                                                                                                                                                                                                                                                                                                                                                                                                                                                                                                                           | 590-590.9, 595-595.9, 597-597.9, 599.0                                                                                                                                                                                                                                                                                                                                                                                                                                                                                          |
| Urolithiasis                                                                                                                       | N20-N23.0                                                                                                                                                                                                                                                                                                                                                                                                                                                                                                                                                                                                                                                                                                                                                                                                                                                                                    | 592-592.9, 594-594.9, 788.0                                                                                                                                                                                                                                                                                                                                                                                                                                                                                                     |
| Other urinary diseases                                                                                                             | N25-N28.1, N29-N29.8, N31-N32.0, N32.3-N32.4, N36-N36.9, N39, N41-N41.9, N44-N44.0, N45-N45.9, N49-N49.9                                                                                                                                                                                                                                                                                                                                                                                                                                                                                                                                                                                                                                                                                                                                                                                     | 588-588.9, 593-593.8, 596-596.9, 598-598.1, 598.8-599, 599.1-599.6, 599.8, 601-602.9, 604-604.9, 608.2                                                                                                                                                                                                                                                                                                                                                                                                                          |
| Gynaecological diseases                                                                                                            | D25-D26, D28.2, E28.2, N72-N72.0, N75-N77.8, N80-N81.9, N83-N83.9                                                                                                                                                                                                                                                                                                                                                                                                                                                                                                                                                                                                                                                                                                                                                                                                                            | 218-219, 219.1-219.9, 236.0, 256.4, 617-618.9, 620-620.9, 621.4-621.9, 622.3-622.6, 629-629.8                                                                                                                                                                                                                                                                                                                                                                                                                                   |
| Uterine fibroids                                                                                                                   | D25-D26, D28.2                                                                                                                                                                                                                                                                                                                                                                                                                                                                                                                                                                                                                                                                                                                                                                                                                                                                               | 218-219, 219.1-219.9, 236.0                                                                                                                                                                                                                                                                                                                                                                                                                                                                                                     |
| Endometriosis                                                                                                                      | N80-N80.9                                                                                                                                                                                                                                                                                                                                                                                                                                                                                                                                                                                                                                                                                                                                                                                                                                                                                    | 617-617.9                                                                                                                                                                                                                                                                                                                                                                                                                                                                                                                       |
| Genital prolapse                                                                                                                   | N81-N81.9                                                                                                                                                                                                                                                                                                                                                                                                                                                                                                                                                                                                                                                                                                                                                                                                                                                                                    | 618-618.9                                                                                                                                                                                                                                                                                                                                                                                                                                                                                                                       |
| Other gynaecological diseases                                                                                                      | N72-N72.0, N75-N77.8, N83-N83.9                                                                                                                                                                                                                                                                                                                                                                                                                                                                                                                                                                                                                                                                                                                                                                                                                                                              | 620-620.9, 621.4-621.9, 622.3-622.6, 629-629.8                                                                                                                                                                                                                                                                                                                                                                                                                                                                                  |
| Haemoglobinopathies and haemolytic anaemias                                                                                        | D55-D58.9, D59.1, D59.3, D59.5, D60-D61.9, D64.0                                                                                                                                                                                                                                                                                                                                                                                                                                                                                                                                                                                                                                                                                                                                                                                                                                             | 282-284.9                                                                                                                                                                                                                                                                                                                                                                                                                                                                                                                       |
| Thalassaemias                                                                                                                      | D56-D56.9                                                                                                                                                                                                                                                                                                                                                                                                                                                                                                                                                                                                                                                                                                                                                                                                                                                                                    | 282.4-282.5                                                                                                                                                                                                                                                                                                                                                                                                                                                                                                                     |
| Sickle cell disorders                                                                                                              | D57-D57.8                                                                                                                                                                                                                                                                                                                                                                                                                                                                                                                                                                                                                                                                                                                                                                                                                                                                                    | 282.6                                                                                                                                                                                                                                                                                                                                                                                                                                                                                                                           |
| G6PD deficiency                                                                                                                    | D55-D55.2                                                                                                                                                                                                                                                                                                                                                                                                                                                                                                                                                                                                                                                                                                                                                                                                                                                                                    | 282.2-282.3                                                                                                                                                                                                                                                                                                                                                                                                                                                                                                                     |
| Other haemoglobinopathies and haemolytic anaemias                                                                                  | D55.3-D55.9, D58-D58.9, D59.1, D59.3, D59.5, D60-D61.9, D64.0                                                                                                                                                                                                                                                                                                                                                                                                                                                                                                                                                                                                                                                                                                                                                                                                                                | 282-282.1, 282.7-284.9                                                                                                                                                                                                                                                                                                                                                                                                                                                                                                          |
| Endocrine, metabolic, blood, and immune disorders                                                                                  | D52.1, D59.0, D59.2, D59.6, D66-D67, D68.0-D69.8, D70-D70.2, D70.4-D75.8, D76-D78.8, D86.8, D89-D89.2, E03-E07.1, E09-E09.9, E15.0, E16.0-E16.9, E20-E24.3, E24.8-E28.1, E28.3-E34, E34.1-E34.8, E36-E36.8, E65-E68, E70-E85.2, E88-E89.9, G21.0-G21.1, G24.0, G25.1, G25.4, G25.6-G25.7, G72.0, G93.7, G97-G97.9, I95.2-I95.3, I97-I97.9, I98.9, J70.0-J70.5, J95-J95.9, K43-K43.9, K52.0, K62.7, K91-K91.9, K94-K95.8, M87.1, N14-N14.4, N65-N65.1, N99-N99.9, P96.2, P96.5, R50.2                                                                                                                                                                                                                                                                                                                                                                                                         | 240-243.9, 244.0-244.1, 244.3-244.8, 245-246.9, 251-256.3, 256.8-259.1, 259.3-259.9, 270-273.9, 275-276, 277-277.2, 277.4-277.9, 278.0-278.8, 286-286.5, 286.7-289.0, 289.4-289.7, 357.6, 518.7, 519.0, 536.4, 539-539.9, 551.2, 552.2, 564.2-564.4, 569.6, 579.3, 598.2, 775.3, 779.4-779.5                                                                                                                                                                                                                                    |
| Sudden infant death syndrome                                                                                                       | R95-R95.9                                                                                                                                                                                                                                                                                                                                                                                                                                                                                                                                                                                                                                                                                                                                                                                                                                                                                    | 798-798.0                                                                                                                                                                                                                                                                                                                                                                                                                                                                                                                       |
| Injuries                                                                                                                           | L55-L55.9, L56.3, L56.8-L56.9, L58-L58.9, N30.4, U00-U03, V00-V06.9, V87.2-V87.3, V88.2-V88.3, V90-V98.8, W00-W46.2, W49-W62.9, W64-W70.9, W73-W75.9, W77-W81.9, W83-W94.9, W97.9, W99-X06.9, X08-X39.9, X47-X48.9, X50-X54.9, X57-X58.9, X60-X64.9, X66-X83.9, X85-Y08.9, Y35-Y84.9, Y87.0-Y87.1, Y88-Y88.3, Y89.0-Y89.1                                                                                                                                                                                                                                                                                                                                                                                                                                                                                                                                                                    | 349.0-349.1, 457.0, E800-E807, E830-E838, E840-E849, E856-E857, E861-E865, E867-E869, E870-E876, E878-E879, E880-E886, E888-E928, E930-E979, E990-E999                                                                                                                                                                                                                                                                                                                                                                          |
| Transport injuries                                                                                                                 | V00-V06.9, V87.2-V87.3, V88.2-V88.3, V90-V98.8                                                                                                                                                                                                                                                                                                                                                                                                                                                                                                                                                                                                                                                                                                                                                                                                                                               | E800-E807, E830-E838, E840-E849                                                                                                                                                                                                                                                                                                                                                                                                                                                                                                 |
| Road injuries                                                                                                                      | V01-V04.9, V06-V08.9, V82-V82.9, V87.2-V87.3                                                                                                                                                                                                                                                                                                                                                                                                                                                                                                                                                                                                                                                                                                                                                                                                                                                 |                                                                                                                                                                                                                                                                                                                                                                                                                                                                                                                                 |
| Pedestrian road injuries                                                                                                           | V01-V04.9, V06-V09.9                                                                                                                                                                                                                                                                                                                                                                                                                                                                                                                                                                                                                                                                                                                                                                                                                                                                         |                                                                                                                                                                                                                                                                                                                                                                                                                                                                                                                                 |
| Cyclist road injuries                                                                                                              | V10-V19.9                                                                                                                                                                                                                                                                                                                                                                                                                                                                                                                                                                                                                                                                                                                                                                                                                                                                                    |                                                                                                                                                                                                                                                                                                                                                                                                                                                                                                                                 |
| Motorcyclist road injuries                                                                                                         | V20-V29.9                                                                                                                                                                                                                                                                                                                                                                                                                                                                                                                                                                                                                                                                                                                                                                                                                                                                                    |                                                                                                                                                                                                                                                                                                                                                                                                                                                                                                                                 |
| Motor vehicle road injuries                                                                                                        | V30-V79.9, V87.2-V87.3                                                                                                                                                                                                                                                                                                                                                                                                                                                                                                                                                                                                                                                                                                                                                                                                                                                                       |                                                                                                                                                                                                                                                                                                                                                                                                                                                                                                                                 |
| Other road injuries                                                                                                                | V80-V80.9, V82-V82.9                                                                                                                                                                                                                                                                                                                                                                                                                                                                                                                                                                                                                                                                                                                                                                                                                                                                         |                                                                                                                                                                                                                                                                                                                                                                                                                                                                                                                                 |
| Other transport injuries                                                                                                           | V00-V00.8, V05-V05.9, V81-V81.9, V83-V86.9, V88.2-V88.3, V90-V98.8                                                                                                                                                                                                                                                                                                                                                                                                                                                                                                                                                                                                                                                                                                                                                                                                                           | E800-E807, E830-E838, E840-E849                                                                                                                                                                                                                                                                                                                                                                                                                                                                                                 |
| Unintentional injuries                                                                                                             | L55-L55.9, L56.3, L56.8-L56.9, L58-L58.9, N30.4, W00-W46.2, W49-W62.9, W64-W70.9, W73-W75.9, W77-W81.9, W83-W94.9, W97.9, W99-X06.9, X08-X39.9, X47-X48.9, X50-X54.9, X57-X58.9, Y40-Y84.9, Y88-Y88.3                                                                                                                                                                                                                                                                                                                                                                                                                                                                                                                                                                                                                                                                                        | 349.0-349.1, 457.0, E856-E857, E861-E865, E867-E869, E870-E876, E878-E879, E880-E886, E888-E928, E930-E949                                                                                                                                                                                                                                                                                                                                                                                                                      |
| Falls                                                                                                                              | W00-W19.9                                                                                                                                                                                                                                                                                                                                                                                                                                                                                                                                                                                                                                                                                                                                                                                                                                                                                    | E880-E886, E888                                                                                                                                                                                                                                                                                                                                                                                                                                                                                                                 |
| Drowning                                                                                                                           | W65-W70.9, W73-W74.9                                                                                                                                                                                                                                                                                                                                                                                                                                                                                                                                                                                                                                                                                                                                                                                                                                                                         | E910                                                                                                                                                                                                                                                                                                                                                                                                                                                                                                                            |



| List of International Classification of Diseases (ICD) codes mapped to the Global Burden of Disease cause list for causes of death |                                                                                                                                                                                                                                                                                                                                                                                                                                                                                                                                                                                                                                                                                                                                                                                                                                                                                                                                                                                                                                                                                                                                                                                                                                                                                                                                                                                                                                                                                                                                                                                                                                                                                                                                                                                                                             |                                                                                                                                                                                                                                                                                                                                                                                                                                                                                                                                                                                                                                                                                                                                                                                                                                                                                                                                                                                                                                                                                                                                                                                                                                                    |
|------------------------------------------------------------------------------------------------------------------------------------|-----------------------------------------------------------------------------------------------------------------------------------------------------------------------------------------------------------------------------------------------------------------------------------------------------------------------------------------------------------------------------------------------------------------------------------------------------------------------------------------------------------------------------------------------------------------------------------------------------------------------------------------------------------------------------------------------------------------------------------------------------------------------------------------------------------------------------------------------------------------------------------------------------------------------------------------------------------------------------------------------------------------------------------------------------------------------------------------------------------------------------------------------------------------------------------------------------------------------------------------------------------------------------------------------------------------------------------------------------------------------------------------------------------------------------------------------------------------------------------------------------------------------------------------------------------------------------------------------------------------------------------------------------------------------------------------------------------------------------------------------------------------------------------------------------------------------------|----------------------------------------------------------------------------------------------------------------------------------------------------------------------------------------------------------------------------------------------------------------------------------------------------------------------------------------------------------------------------------------------------------------------------------------------------------------------------------------------------------------------------------------------------------------------------------------------------------------------------------------------------------------------------------------------------------------------------------------------------------------------------------------------------------------------------------------------------------------------------------------------------------------------------------------------------------------------------------------------------------------------------------------------------------------------------------------------------------------------------------------------------------------------------------------------------------------------------------------------------|
| Cause                                                                                                                              | ICD10                                                                                                                                                                                                                                                                                                                                                                                                                                                                                                                                                                                                                                                                                                                                                                                                                                                                                                                                                                                                                                                                                                                                                                                                                                                                                                                                                                                                                                                                                                                                                                                                                                                                                                                                                                                                                       | ICD9                                                                                                                                                                                                                                                                                                                                                                                                                                                                                                                                                                                                                                                                                                                                                                                                                                                                                                                                                                                                                                                                                                                                                                                                                                               |
| Fire, heat, and hot substances                                                                                                     | X00-X06.9, X08-X19.9                                                                                                                                                                                                                                                                                                                                                                                                                                                                                                                                                                                                                                                                                                                                                                                                                                                                                                                                                                                                                                                                                                                                                                                                                                                                                                                                                                                                                                                                                                                                                                                                                                                                                                                                                                                                        | E890-E899, E924                                                                                                                                                                                                                                                                                                                                                                                                                                                                                                                                                                                                                                                                                                                                                                                                                                                                                                                                                                                                                                                                                                                                                                                                                                    |
| Poisonings                                                                                                                         | X47-X48.9                                                                                                                                                                                                                                                                                                                                                                                                                                                                                                                                                                                                                                                                                                                                                                                                                                                                                                                                                                                                                                                                                                                                                                                                                                                                                                                                                                                                                                                                                                                                                                                                                                                                                                                                                                                                                   | E856-E857, E861-E865, E867-E869                                                                                                                                                                                                                                                                                                                                                                                                                                                                                                                                                                                                                                                                                                                                                                                                                                                                                                                                                                                                                                                                                                                                                                                                                    |
| Poisoning by carbon monoxide                                                                                                       | X47-X47.9                                                                                                                                                                                                                                                                                                                                                                                                                                                                                                                                                                                                                                                                                                                                                                                                                                                                                                                                                                                                                                                                                                                                                                                                                                                                                                                                                                                                                                                                                                                                                                                                                                                                                                                                                                                                                   | E862, E868-E869                                                                                                                                                                                                                                                                                                                                                                                                                                                                                                                                                                                                                                                                                                                                                                                                                                                                                                                                                                                                                                                                                                                                                                                                                                    |
| Poisoning by other means                                                                                                           | X48-X48.9                                                                                                                                                                                                                                                                                                                                                                                                                                                                                                                                                                                                                                                                                                                                                                                                                                                                                                                                                                                                                                                                                                                                                                                                                                                                                                                                                                                                                                                                                                                                                                                                                                                                                                                                                                                                                   | E856-E857, E861, E863-E865, E867                                                                                                                                                                                                                                                                                                                                                                                                                                                                                                                                                                                                                                                                                                                                                                                                                                                                                                                                                                                                                                                                                                                                                                                                                   |
| Exposure to mechanical forces                                                                                                      | W20-W38.9, W40-W43.9, W45.0-W45.2, W46-W46.2, W49-W52                                                                                                                                                                                                                                                                                                                                                                                                                                                                                                                                                                                                                                                                                                                                                                                                                                                                                                                                                                                                                                                                                                                                                                                                                                                                                                                                                                                                                                                                                                                                                                                                                                                                                                                                                                       | E916-E922                                                                                                                                                                                                                                                                                                                                                                                                                                                                                                                                                                                                                                                                                                                                                                                                                                                                                                                                                                                                                                                                                                                                                                                                                                          |
| Unintentional firearm injuries                                                                                                     | W32-W34.9                                                                                                                                                                                                                                                                                                                                                                                                                                                                                                                                                                                                                                                                                                                                                                                                                                                                                                                                                                                                                                                                                                                                                                                                                                                                                                                                                                                                                                                                                                                                                                                                                                                                                                                                                                                                                   | E922                                                                                                                                                                                                                                                                                                                                                                                                                                                                                                                                                                                                                                                                                                                                                                                                                                                                                                                                                                                                                                                                                                                                                                                                                                               |
| Other exposure to mechanical forces                                                                                                | W20-W31.9, W35-W38.9, W40-W43.9, W45.0-W45.2, W46-W46.2, W49-W52                                                                                                                                                                                                                                                                                                                                                                                                                                                                                                                                                                                                                                                                                                                                                                                                                                                                                                                                                                                                                                                                                                                                                                                                                                                                                                                                                                                                                                                                                                                                                                                                                                                                                                                                                            | E916-E921                                                                                                                                                                                                                                                                                                                                                                                                                                                                                                                                                                                                                                                                                                                                                                                                                                                                                                                                                                                                                                                                                                                                                                                                                                          |
| Adverse effects of medical treatment                                                                                               | N30.4, Y40-Y84.9, Y88-Y88.3                                                                                                                                                                                                                                                                                                                                                                                                                                                                                                                                                                                                                                                                                                                                                                                                                                                                                                                                                                                                                                                                                                                                                                                                                                                                                                                                                                                                                                                                                                                                                                                                                                                                                                                                                                                                 | 349.0-349.1, 457.0, E870-E876, E878-E879, E930-E949                                                                                                                                                                                                                                                                                                                                                                                                                                                                                                                                                                                                                                                                                                                                                                                                                                                                                                                                                                                                                                                                                                                                                                                                |
| Animal contact                                                                                                                     | W52.0-W62.9, W64-W64.9, X20-X29.9                                                                                                                                                                                                                                                                                                                                                                                                                                                                                                                                                                                                                                                                                                                                                                                                                                                                                                                                                                                                                                                                                                                                                                                                                                                                                                                                                                                                                                                                                                                                                                                                                                                                                                                                                                                           | E905-E906                                                                                                                                                                                                                                                                                                                                                                                                                                                                                                                                                                                                                                                                                                                                                                                                                                                                                                                                                                                                                                                                                                                                                                                                                                          |
| Venomous animal contact                                                                                                            | X20-X29.9                                                                                                                                                                                                                                                                                                                                                                                                                                                                                                                                                                                                                                                                                                                                                                                                                                                                                                                                                                                                                                                                                                                                                                                                                                                                                                                                                                                                                                                                                                                                                                                                                                                                                                                                                                                                                   | E905                                                                                                                                                                                                                                                                                                                                                                                                                                                                                                                                                                                                                                                                                                                                                                                                                                                                                                                                                                                                                                                                                                                                                                                                                                               |
| Non-venomous animal contact                                                                                                        | W52.0-W62.9, W64-W64.9                                                                                                                                                                                                                                                                                                                                                                                                                                                                                                                                                                                                                                                                                                                                                                                                                                                                                                                                                                                                                                                                                                                                                                                                                                                                                                                                                                                                                                                                                                                                                                                                                                                                                                                                                                                                      | E906                                                                                                                                                                                                                                                                                                                                                                                                                                                                                                                                                                                                                                                                                                                                                                                                                                                                                                                                                                                                                                                                                                                                                                                                                                               |
| Foreign body                                                                                                                       | W44-W45, W45.3-W45.9, W75-W75.9, W78-W80.9, W83-W84.9                                                                                                                                                                                                                                                                                                                                                                                                                                                                                                                                                                                                                                                                                                                                                                                                                                                                                                                                                                                                                                                                                                                                                                                                                                                                                                                                                                                                                                                                                                                                                                                                                                                                                                                                                                       | E911-E915                                                                                                                                                                                                                                                                                                                                                                                                                                                                                                                                                                                                                                                                                                                                                                                                                                                                                                                                                                                                                                                                                                                                                                                                                                          |
| Pulmonary aspiration and foreign body in airway                                                                                    | W75-W75.9, W78-W80.9, W83-W84.9                                                                                                                                                                                                                                                                                                                                                                                                                                                                                                                                                                                                                                                                                                                                                                                                                                                                                                                                                                                                                                                                                                                                                                                                                                                                                                                                                                                                                                                                                                                                                                                                                                                                                                                                                                                             | E911-E913                                                                                                                                                                                                                                                                                                                                                                                                                                                                                                                                                                                                                                                                                                                                                                                                                                                                                                                                                                                                                                                                                                                                                                                                                                          |
| Foreign body in other body part                                                                                                    | W44-W45, W45.3-W45.9                                                                                                                                                                                                                                                                                                                                                                                                                                                                                                                                                                                                                                                                                                                                                                                                                                                                                                                                                                                                                                                                                                                                                                                                                                                                                                                                                                                                                                                                                                                                                                                                                                                                                                                                                                                                        | E914-E915                                                                                                                                                                                                                                                                                                                                                                                                                                                                                                                                                                                                                                                                                                                                                                                                                                                                                                                                                                                                                                                                                                                                                                                                                                          |
| Environmental heat and cold exposure                                                                                               | L55-L55.9, L56.3, L56.8-L56.9, L58-L58.9, W88-W94.9, W97.9, W99-W99.9, X30-X32.9, X39-X39.9                                                                                                                                                                                                                                                                                                                                                                                                                                                                                                                                                                                                                                                                                                                                                                                                                                                                                                                                                                                                                                                                                                                                                                                                                                                                                                                                                                                                                                                                                                                                                                                                                                                                                                                                 | E900-E902, E926                                                                                                                                                                                                                                                                                                                                                                                                                                                                                                                                                                                                                                                                                                                                                                                                                                                                                                                                                                                                                                                                                                                                                                                                                                    |
| Exposure to forces of nature                                                                                                       | X33-X38.9                                                                                                                                                                                                                                                                                                                                                                                                                                                                                                                                                                                                                                                                                                                                                                                                                                                                                                                                                                                                                                                                                                                                                                                                                                                                                                                                                                                                                                                                                                                                                                                                                                                                                                                                                                                                                   | E907-E909                                                                                                                                                                                                                                                                                                                                                                                                                                                                                                                                                                                                                                                                                                                                                                                                                                                                                                                                                                                                                                                                                                                                                                                                                                          |
| Still Born                                                                                                                         | P95-P95.9                                                                                                                                                                                                                                                                                                                                                                                                                                                                                                                                                                                                                                                                                                                                                                                                                                                                                                                                                                                                                                                                                                                                                                                                                                                                                                                                                                                                                                                                                                                                                                                                                                                                                                                                                                                                                   | 768.0-768.1                                                                                                                                                                                                                                                                                                                                                                                                                                                                                                                                                                                                                                                                                                                                                                                                                                                                                                                                                                                                                                                                                                                                                                                                                                        |
| Other unintentional injuries                                                                                                       | W39-W39.9, W77-W77.9, W81-W81.9, W85-W87.9, X50-X54.9, X57-X58.9                                                                                                                                                                                                                                                                                                                                                                                                                                                                                                                                                                                                                                                                                                                                                                                                                                                                                                                                                                                                                                                                                                                                                                                                                                                                                                                                                                                                                                                                                                                                                                                                                                                                                                                                                            | E903-E904, E923, E925, E927-E928                                                                                                                                                                                                                                                                                                                                                                                                                                                                                                                                                                                                                                                                                                                                                                                                                                                                                                                                                                                                                                                                                                                                                                                                                   |
| Self-harm and interpersonal violence                                                                                               | U00-U03, X60-X64.9, X66-X83.9, X85-Y08.9, Y35-Y38.9, Y87.0-Y87.1, Y89.0-Y89.1                                                                                                                                                                                                                                                                                                                                                                                                                                                                                                                                                                                                                                                                                                                                                                                                                                                                                                                                                                                                                                                                                                                                                                                                                                                                                                                                                                                                                                                                                                                                                                                                                                                                                                                                               | E950-E979, E990-E999                                                                                                                                                                                                                                                                                                                                                                                                                                                                                                                                                                                                                                                                                                                                                                                                                                                                                                                                                                                                                                                                                                                                                                                                                               |
| Self-harm                                                                                                                          | X60-X64.9, X66-X83.9, Y87.0                                                                                                                                                                                                                                                                                                                                                                                                                                                                                                                                                                                                                                                                                                                                                                                                                                                                                                                                                                                                                                                                                                                                                                                                                                                                                                                                                                                                                                                                                                                                                                                                                                                                                                                                                                                                 | E950-E959                                                                                                                                                                                                                                                                                                                                                                                                                                                                                                                                                                                                                                                                                                                                                                                                                                                                                                                                                                                                                                                                                                                                                                                                                                          |
| Self-harm by firearm                                                                                                               | X72-X74.9                                                                                                                                                                                                                                                                                                                                                                                                                                                                                                                                                                                                                                                                                                                                                                                                                                                                                                                                                                                                                                                                                                                                                                                                                                                                                                                                                                                                                                                                                                                                                                                                                                                                                                                                                                                                                   | E955                                                                                                                                                                                                                                                                                                                                                                                                                                                                                                                                                                                                                                                                                                                                                                                                                                                                                                                                                                                                                                                                                                                                                                                                                                               |
| Self-harm by other specified means                                                                                                 | X60-X64.9, X66-X71.9, X75-X83.9, Y87.0                                                                                                                                                                                                                                                                                                                                                                                                                                                                                                                                                                                                                                                                                                                                                                                                                                                                                                                                                                                                                                                                                                                                                                                                                                                                                                                                                                                                                                                                                                                                                                                                                                                                                                                                                                                      | E950-E954, E956-E959                                                                                                                                                                                                                                                                                                                                                                                                                                                                                                                                                                                                                                                                                                                                                                                                                                                                                                                                                                                                                                                                                                                                                                                                                               |
| Interpersonal violence                                                                                                             | X85-Y08.9, Y87.1                                                                                                                                                                                                                                                                                                                                                                                                                                                                                                                                                                                                                                                                                                                                                                                                                                                                                                                                                                                                                                                                                                                                                                                                                                                                                                                                                                                                                                                                                                                                                                                                                                                                                                                                                                                                            | E960-E969                                                                                                                                                                                                                                                                                                                                                                                                                                                                                                                                                                                                                                                                                                                                                                                                                                                                                                                                                                                                                                                                                                                                                                                                                                          |
| Physical violence by firearm                                                                                                       | X93-X95.9                                                                                                                                                                                                                                                                                                                                                                                                                                                                                                                                                                                                                                                                                                                                                                                                                                                                                                                                                                                                                                                                                                                                                                                                                                                                                                                                                                                                                                                                                                                                                                                                                                                                                                                                                                                                                   | E965                                                                                                                                                                                                                                                                                                                                                                                                                                                                                                                                                                                                                                                                                                                                                                                                                                                                                                                                                                                                                                                                                                                                                                                                                                               |
| Physical violence by sharp object                                                                                                  | X99-X99.9                                                                                                                                                                                                                                                                                                                                                                                                                                                                                                                                                                                                                                                                                                                                                                                                                                                                                                                                                                                                                                                                                                                                                                                                                                                                                                                                                                                                                                                                                                                                                                                                                                                                                                                                                                                                                   | E966                                                                                                                                                                                                                                                                                                                                                                                                                                                                                                                                                                                                                                                                                                                                                                                                                                                                                                                                                                                                                                                                                                                                                                                                                                               |
| Physical violence by other means                                                                                                   | X85-X92.9, X96-X98.9, Y00-Y04.9, Y06-Y08.9, Y87.1                                                                                                                                                                                                                                                                                                                                                                                                                                                                                                                                                                                                                                                                                                                                                                                                                                                                                                                                                                                                                                                                                                                                                                                                                                                                                                                                                                                                                                                                                                                                                                                                                                                                                                                                                                           | E961-E964, E967-E969                                                                                                                                                                                                                                                                                                                                                                                                                                                                                                                                                                                                                                                                                                                                                                                                                                                                                                                                                                                                                                                                                                                                                                                                                               |
| Conflict and terrorism                                                                                                             | U00-U03, Y36-Y38.9, Y89.1                                                                                                                                                                                                                                                                                                                                                                                                                                                                                                                                                                                                                                                                                                                                                                                                                                                                                                                                                                                                                                                                                                                                                                                                                                                                                                                                                                                                                                                                                                                                                                                                                                                                                                                                                                                                   | E979, E990-E999                                                                                                                                                                                                                                                                                                                                                                                                                                                                                                                                                                                                                                                                                                                                                                                                                                                                                                                                                                                                                                                                                                                                                                                                                                    |
| Police conflict and executions                                                                                                     | Y35-Y35.9, Y89.0                                                                                                                                                                                                                                                                                                                                                                                                                                                                                                                                                                                                                                                                                                                                                                                                                                                                                                                                                                                                                                                                                                                                                                                                                                                                                                                                                                                                                                                                                                                                                                                                                                                                                                                                                                                                            | E970-E978                                                                                                                                                                                                                                                                                                                                                                                                                                                                                                                                                                                                                                                                                                                                                                                                                                                                                                                                                                                                                                                                                                                                                                                                                                          |
| Garbage Code (GBD Level 1)                                                                                                         | A40-A41.9, A48.0, A48.3, A49.0-A49.1, A59-A59.9, A71-A71.9, A74.0, B07-B07.9, B30-B30.9, B35-B36.9, B85-B85.4, B87-B88.9, B94.0, D50-D50.0, D50.9, D62-D63.0, D63.8-D64, D64.1-D65.9, D68, D69.9, E15, E16, E50-E50.9, E64.1, E85.3-E87.6, E87.8-E87.9, F06.2-F06.4, F07.2, F09-F09.9, F19-F23.9, F25-F49, F51-F99.0, G06-G08.0, G32-G32.8, G43-G44.2, G44.4-G44.8, G47-G47.2, G47.4-G47.9, G50-G60.9, G62-G62.0, G62.2-G65.2, G80-G83.9, G89-G89.4, G91-G91.2, G91.4-G93, G93.1-G93.2, G93.4-G93.6, G94.0-G94.8, G99-H05, H05.2-H69.9, H71-H99, I26-I26.9, I31.2-I31.4, I46-I46.9, I50.0-I50.4, I76, I95-I95.1, I95.8-I95.9, J69-J69.9, J80-J80.9, J81.0, J85-J85.3, J86-J86.9, J93-J93.1, J93.8-J93.9, J94.2, J96-J96.9, J98.1-J98.3, K00-K19, K30, K65-K66.1, K66.9, K68.1-K68.9, K71-K71.6, K71.8-K72.9, K75.0, L20-L30.9, L40-L50.9, L52-L54.8, L56-L56.2, L56.4-L56.5, L57-L57.9, L59-L68.9, L70-L76.8, L80-L87.9, L90-L92.9, L94-L96, L98.5-L99.8, M04, M10-M12.0, M12.2-M29, M37-M39, M43.2-M49, M49.2-M64, M65.1-M71, M71.2-M72.4, M72.8-M73, M73.8-M79.9, M83-M86.2, M86.5-M86.9, M87.2-M87.9, M89.1-M89.4, M90-M99.9, N17-N17.9, N19-N19.9, N32.1-N32.2, N32.8-N33.8, N35-N35.9, N37-N37.8, N39.3-N39.8, N42-N43.4, N44.1-N44.8, N46-N48.9, N50-N53.9, N61-N64.9, N82-N82.9, N91-N91.5, N95, N95.1-N95.9, N97-N97.9, R02-R02.9, R03.1, R07.0, R08-R09, R09.3, R11-R12.0, R14-R19.6, R19.8-R23, R23.1-R30.9, R32-R50.1, R50.8-R57.9, R58.0-R72.9, R74-R78, R78.6-R94.8, R96-R99.9, U05, U07-U81, U89.9-U99, X40-X44.9, X46-X46.9, X49-X49.9, Y10-Y14.9, Y16-Y19.9, Z00-Z15.8, Z17-unsp.                                                                                                                                                                                                                           | 038-038.9, 040.0, 041.1, 076-078.2, 110-111.9, 125-125.3, 126-126.9, 127.2-127.9, 131-132.9, 133.8-134.9, 136.6, 139.1, 139.9, 247-248, 264-264.9, 274-274.9, 276.0-276.5, 276.7-276.9, 277.3, 280-281, 285-285.9, 286.6, 289.1-289.3, 293, 294-294.0, 295-302.9, 305, 305.9-307.0, 307.2-307.4, 307.6-319.9, 324-327.1, 328-329, 338-339.1, 339.3-339.8, 342-344.9, 346-346.9, 350-353.6, 354-355.9, 360-362, 362.1-376, 376.2-380.9, 384-389.9, 415-415.9, 423.0, 424, 424.4-424.5, 424.9, 427.5, 427.9-428.9, 437.3, 458-458.9, 459.0, 507-507.9, 510-510.9, 512-513.9, 518.1-518.2, 520-529.9, 536.3, 536.8-536.9, 537.7, 537.9, 564.8-564.9, 567-568.9, 570-570.9, 572-572.1, 573.1-573.3, 584-584.9, 586-587.9, 603-603.9, 605-608.1, 608.3-609, 611-612.1, 615-616.9, 619-619.9, 621-621.3, 622-622.0, 622.8-623.6, 623.8-624.5, 624.8-628.9, 629.9, 690-693.9, 695.8-706.9, 708-709.9, 712-713.8, 715-716, 716.2-721.6, 721.8-730.0, 730.2-730.3, 730.7-731.9, 733, 733.2-734.2, 737-738, 738.2-739.9, 780-782.4, 782.6-784.6, 784.9, 785.4-786, 786.6, 786.8, 787, 787.3-788, 788.3-789, 789.1-789.2, 789.5, 790-790.1, 790.4-796.1, 796.3-797.9, 798.1-799, 799.2-799.9, 999.0-999.9, E851-E855, E858, E866, E980-E982, V01-V08, V10-uns |
| Garbage Code (GBD Level 2)                                                                                                         | A14.9, A29-A30.9, A45-A45.9, A47-A48, A48.8-A49, A49.3-A49.9, A61-A62, A72-A73, A76, A97, B08-B09, B11-B14, B28-B29, B31-B32.4, B34-B34.9, B61-B62, B68-B68.9, B73-B74.2, B76-B76.9, B78-B81.8, B84, B92-B94, B94.8-B94.9, B95.6-B97.3, B97.7-B99.9, D59, D59.4, D59.8-D59.9, F17-F17.9, G44.3, G91.3, G93.0, G93.3, I10-I10.9, I15-I15.9, I27, I27.8-I27.9, I50, I50.8-I50.9, I67.4, I70-I70.1, I70.9, I74-I75.8, J81, J81.1, J90-J90.0, J94-J94.1, J94.8-J94.9, K92.0-K92.2, N70-N71.9, N73-N74.0, N74.2-N74.8, R03-R03.0, R04-R06.9, R09.0-R09.2, R09.8-R10.9, R13-R13.9, R23.0, R58, S00-T98.3, W47-W48, W63, W71-W72, W76-W76.9, W82, W95-W97, W98, X07, X55-X56, X59-X59.9, Y20-Y34.9, Y86-Y87, Y87.2, Y89, Y89.9, Y99.9                                                                                                                                                                                                                                                                                                                                                                                                                                                                                                                                                                                                                                                                                                                                                                                                                                                                                                                                                                                                                                                                                              | 000-000.9, 030-030.9, 041.2-041.9, 067-069, 078.8-078.9, 079.8-079.9, 089-089.9, 105-109.9, 119, 136.8-136.9, 139.8, 304, 304.9, 305.1, 339.2, 401-401.9, 405-405.9, 416, 416.2-416.9, 440-440.1, 440.3, 440.8-440.9, 444-445.8, 490-490.9, 494-494.9, 511-511.9, 514-514.9, 515.0-515.9, 518-518.0, 518.3-518.5, 518.8, 536.2, 578-578.9, 599.7, 613-614.9, 714.4, 716.1, 721.7, 735-736.9, 738.0-738.1, 784.7-784.8, 786.3, 787.0-787.2, 789.0, 789.3-789.4, 789.6-789.9, 796.2, 799.0-799.1, 800-999, E000-E80, E83, E839, E85, E859, E87, E877, E88, E887, E929, E983-E985, E988-E989                                                                                                                                                                                                                                                                                                                                                                                                                                                                                                                                                                                                                                                          |
| Garbage Code (GBD Level 3)                                                                                                         | A01, A31-A31.9, A42-A44.9, A49.2, A64-A64.0, A99-A99.0, B17, B17.1, B17.8-B17.9, B19-B19.0, B19.2-B19.9, B37-B46.9, B49-B49.9, B55, B55.1-B55.9, B58-B59.9, B89, B94.2, C14-C14.9, C22.9, C26-C29, C35-C36, C39-C39.9, C42, C46-C46.9, C55-C55.9, C57.9, C59, C63.9, C68, C68.9, C74-C74.9, C75.9-C80.9, C87, C97-D00.0, D01, D01.4-D02, D02.4-D02.9, D07, D07.3, D07.6-D09, D09.1, D09.7, D09.9-D10, D10.9, D13, D13.9-D14, D14.4, D17-D21.9, D28, D28.9-D29, D29.9-D30, D30.9, D36.0, D36.9-D37.0, D37.6-D38, D38.6-D39.0, D39.7, D39.9-D40, D40.9-D41, D41.9, D44, D44.9, D48, D48.7-D49.1, D49.5, D49.7-D49.9, D54, D75.9, D79-D85, D87-D88, D89.8-D99, E07.8-E08.9, E17-E19, E34.0, E34.9-E35.8, E37-E39, E47-E49., E62, E69, E87.7, E90-E998, F04-F06.1, F06.5-F07.0, F07.8-F08, F50, F50.8-F50.9, G09-G09.9, G15-G19, G21, G21.2, G21.4-G22.0, G27-G29, G33-G34, G38-G39., G42, G48-G49, G66-G69, G74-G79, G84-G88, G93.8-G94, G96-G96.9, G98-G98.9, I00.0, I03-I04, I14-I14.1, I16-I19, I29-I29.9, I44-I45.9, I49-I49.9, I51, I51.6-I59, I90-I94, I96-I96.9, I98.4-I98.8, I99-ID5.9, J02.9, J03.9, J04.3, J06, J06.9, J40-J40.9, J47-J59, J71-J79, J81.9, J83, J85.9, J87-J89, J90.9, J93.6, J97-J98.0, J98.4-J99.8, K21-K21.9, K22.7, K31.9-K34, K39, K47-K49, K53-K54, K63-K63.4, K63.8-K63.9, K69, K70.4-K70.9, K78-K79, K84, K87-K89, K92, K92.9-K93, K96-K99, L06-L07, L09, L15-L19, L31-L39, L69, L77-L79, N09, N13-N13.5, N13.7-N13.9, N24, N28.8-N28.9, N38, N39.9-N40.9, N54-N59, N66-N69, N78-N79, N84, N84.2-N86, N88-N90.9, N92-N94.9, N95.0, O08-O08.9, O17-O19, O27, O37-O39, O49-O59, O78-O79, O93-O95.9, P06, P16-P18, P30-P34.2, P40-P49, P62-P69, P73, P79, P82, P85-P89, P96.9-P99.9, Q08-Q10.3, Q19, Q29-Q29.9, Q36.0-Q36.9, Q46-Q49, Q88, Q89.9, Q94, Q99.9-R01.2, R07, R07.1-R07.9, R31-R31.9 | 002, 031-031.9, 039-039.9, 070, 070.4-070.9, 085, 085.1-085.9, 088.0-088.7, 112-118.9, 130-130.9, 136.3-136.5, 149-149.9, 155.2, 159-159.9, 165-169, 176-179.9, 183.9-184, 184.5, 184.9, 187, 187.9, 189, 189.9, 190.9, 195-199.9, 209, 209.2-209.3, 209.6-210, 211, 211.9-212, 212.9, 214-216.9, 221, 221.9-222, 222.9-223, 223.9, 229, 229.1, 229.9-230.0, 230.9-231, 231.8-231.9, 233, 233.3, 233.6, 233.9-234, 234.9-235, 235.1-235.3, 235.5, 235.9-236, 236.3, 236.6, 236.9, 237.4, 239-239.1, 239.5, 239.7-239.9, 249-249.9, 259.2, 276.6, 278, 279-279.9, 293.0-293.9, 331.3-331.4, 332.1-332.9, 347-348.9, 349.9, 357, 357.8-357.9, 399-400.0, 406-409.4, 418-419.9, 426-427, 427.4, 429, 429.2-429.9, 459.5-459.9, 464.5, 465, 465.9, 505-505.9, 519, 519.8-519.9, 530.1, 530.7-530.9, 544-549, 553.8-553.9, 559-559.0, 560.4-560.7, 561, 562.2-563, 569, 569.8-569.9, 591-591.9, 593.9, 599.9-600.9, 623.7, 624.6, 637-637.9, 639-639.9, 749.1, 759, 759.9, 779.9, 782.5, 785-785.3, 786.0-786.2, 786.4-786.5, 786.7, 786.9, 788.1-788.2, E986-E987                                                                                                                                                                                      |

| List of International Classification of Diseases (ICD) codes mapped to the Global Burden of Disease cause list for causes of death |                                                                                                                                                                                                                                                                                                                                                                                                                    |                                                                                                                                                                                                                                                                   |
|------------------------------------------------------------------------------------------------------------------------------------|--------------------------------------------------------------------------------------------------------------------------------------------------------------------------------------------------------------------------------------------------------------------------------------------------------------------------------------------------------------------------------------------------------------------|-------------------------------------------------------------------------------------------------------------------------------------------------------------------------------------------------------------------------------------------------------------------|
| Cause                                                                                                                              | ICD10                                                                                                                                                                                                                                                                                                                                                                                                              | ICD9                                                                                                                                                                                                                                                              |
| Garbage Code (GBD Level 4)                                                                                                         | B16.9, B64, B82-B82.9, B83.9, C69, C69.9, C91.1, C91.4-C91.5, C91.7-C91.9, C92.7-C92.9, C93.2, C93.5-C93.7, C93.9, E12-E14.9, G00, G00.9-G02.8, G03.9, I37.9, I42-I42.0, I42.9, I51.5, I64-I64.9, I67, I67.8-I68, I68.8-I69, I69.4-I69.9, J07-J08, J15.9, J17-J19.6, J22-J29, J64-J64.9, P23, P23.5-P23.9, P37.3-P37.4, R73-R73.9, V87-V87.1, V87.4-V88.1, V88.4-V89.9, V99-V99.0, X84-X84.9, Y09-Y09.9, Y85-Y85.9 | 070.3, 084, 084.6, 194-194.0, 194.9, 204.1, 204.5-204.9, 205.8-205.9, 206.2-206.9, 238, 244, 244.9, 250-250.9, 289.8-289.9, 307.5, 320, 320.9, 357.2, 362.0, 425, 425.4, 425.9, 429.1, 436-437, 437.9-439.6, 482.9-483, 484, 484.8-486.9, 770.0, 790.2, E808-E829 |

Figure 1A Global number of deaths associated with KP infection in 204 countries and territories

| measure | location                              | sex | age      | cause      | metric | infectious syndrome      | pathogen | year | value  | upper  | lower |
|---------|---------------------------------------|-----|----------|------------|--------|--------------------------|----------|------|--------|--------|-------|
| Deaths  | India                                 | All | All Ages | All causes | Number | All infectious syndromes | KP       | 2019 | 134418 | 185596 | 93816 |
| Deaths  | China                                 | All | All Ages | All causes | Number | All infectious syndromes | KP       | 2019 | 71785  | 110930 | 45486 |
| Deaths  | Nigeria                               | All | All Ages | All causes | Number | All infectious syndromes | KP       | 2019 | 45782  | 59000  | 34092 |
| Deaths  | Pakistan                              | All | All Ages | All causes | Number | All infectious syndromes | KP       | 2019 | 36277  | 49879  | 25336 |
| Deaths  | United States of America              | All | All Ages | All causes | Number | All infectious syndromes | KP       | 2019 | 30250  | 42871  | 20899 |
| Deaths  | Brazil                                | All | All Ages | All causes | Number | All infectious syndromes | KP       | 2019 | 25169  | 33857  | 18489 |
| Deaths  | Indonesia                             | All | All Ages | All causes | Number | All infectious syndromes | KP       | 2019 | 23793  | 33389  | 16158 |
| Deaths  | Russian Federation                    | All | All Ages | All causes | Number | All infectious syndromes | KP       | 2019 | 17292  | 25027  | 11421 |
| Deaths  | Ethiopia                              | All | All Ages | All causes | Number | All infectious syndromes | KP       | 2019 | 16224  | 21044  | 12404 |
| Deaths  | Japan                                 | All | All Ages | All causes | Number | All infectious syndromes | KP       | 2019 | 16203  | 21508  | 11939 |
| Deaths  | Bangladesh                            | All | All Ages | All causes | Number | All infectious syndromes | KP       | 2019 | 15891  | 22707  | 10892 |
| Deaths  | Democratic Republic of the Congo      | All | All Ages | All causes | Number | All infectious syndromes | KP       | 2019 | 13636  | 18036  | 10211 |
| Deaths  | Mexico                                | All | All Ages | All causes | Number | All infectious syndromes | KP       | 2019 | 12873  | 18541  | 8516  |
| Deaths  | Philippines                           | All | All Ages | All causes | Number | All infectious syndromes | KP       | 2019 | 12326  | 16585  | 9178  |
| Deaths  | United Republic of Tanzania           | All | All Ages | All causes | Number | All infectious syndromes | KP       | 2019 | 10007  | 13212  | 7540  |
| Deaths  | Germany                               | All | All Ages | All causes | Number | All infectious syndromes | KP       | 2019 | 9390   | 13194  | 6485  |
| Deaths  | Myanmar                               | All | All Ages | All causes | Number | All infectious syndromes | KP       | 2019 | 8316   | 11935  | 5704  |
| Deaths  | Egypt                                 | All | All Ages | All causes | Number | All infectious syndromes | KP       | 2019 | 8244   | 12324  | 5078  |
| Deaths  | United Kingdom                        | All | All Ages | All causes | Number | All infectious syndromes | KP       | 2019 | 7747   | 10261  | 5771  |
| Deaths  | South Africa                          | All | All Ages | All causes | Number | All infectious syndromes | KP       | 2019 | 7482   | 9732   | 5632  |
| Deaths  | Kenya                                 | All | All Ages | All causes | Number | All infectious syndromes | KP       | 2019 | 6925   | 8926   | 5352  |
| Deaths  | Afghanistan                           | All | All Ages | All causes | Number | All infectious syndromes | KP       | 2019 | 6904   | 9284   | 5018  |
| Deaths  | Mali                                  | All | All Ages | All causes | Number | All infectious syndromes | KP       | 2019 | 6800   | 9201   | 4960  |
| Deaths  | Argentina                             | All | All Ages | All causes | Number | All infectious syndromes | KP       | 2019 | 6717   | 8671   | 5159  |
| Deaths  | Burkina Faso                          | All | All Ages | All causes | Number | All infectious syndromes | KP       | 2019 | 6596   | 8732   | 4993  |
| Deaths  | Thailand                              | All | All Ages | All causes | Number | All infectious syndromes | KP       | 2019 | 6557   | 9568   | 4254  |
| Deaths  | Niger                                 | All | All Ages | All causes | Number | All infectious syndromes | KP       | 2019 | 6471   | 8563   | 4734  |
| Deaths  | Uganda                                | All | All Ages | All causes | Number | All infectious syndromes | KP       | 2019 | 6464   | 8555   | 4846  |
| Deaths  | France                                | All | All Ages | All causes | Number | All infectious syndromes | KP       | 2019 | 6366   | 8832   | 4483  |
| Deaths  | Viet Nam                              | All | All Ages | All causes | Number | All infectious syndromes | KP       | 2019 | 6290   | 9346   | 4157  |
| Deaths  | Mozambique                            | All | All Ages | All causes | Number | All infectious syndromes | KP       | 2019 | 5807   | 7594   | 4438  |
| Deaths  | Turkey                                | All | All Ages | All causes | Number | All infectious syndromes | KP       | 2019 | 5447   | 8265   | 3552  |
| Deaths  | Italy                                 | All | All Ages | All causes | Number | All infectious syndromes | KP       | 2019 | 5345   | 7741   | 3560  |
| Deaths  | Côte d'Ivoire                         | All | All Ages | All causes | Number | All infectious syndromes | KP       | 2019 | 4876   | 6439   | 3605  |
| Deaths  | Ghana                                 | All | All Ages | All causes | Number | All infectious syndromes | KP       | 2019 | 4865   | 6392   | 3651  |
| Deaths  | Ukraine                               | All | All Ages | All causes | Number | All infectious syndromes | KP       | 2019 | 4765   | 7170   | 2876  |
| Deaths  | Spain                                 | All | All Ages | All causes | Number | All infectious syndromes | KP       | 2019 | 4725   | 6429   | 3392  |
| Deaths  | Somalia                               | All | All Ages | All causes | Number | All infectious syndromes | KP       | 2019 | 4720   | 6404   | 3411  |
| Deaths  | Cameroon                              | All | All Ages | All causes | Number | All infectious syndromes | KP       | 2019 | 4655   | 6143   | 3451  |
| Deaths  | Madagascar                            | All | All Ages | All causes | Number | All infectious syndromes | KP       | 2019 | 4353   | 5658   | 3224  |
| Deaths  | Chad                                  | All | All Ages | All causes | Number | All infectious syndromes | KP       | 2019 | 4226   | 5529   | 3164  |
| Deaths  | Angola                                | All | All Ages | All causes | Number | All infectious syndromes | KP       | 2019 | 4170   | 5554   | 3030  |
| Deaths  | Nepal                                 | All | All Ages | All causes | Number | All infectious syndromes | KP       | 2019 | 3933   | 5558   | 2745  |
| Deaths  | Poland                                | All | All Ages | All causes | Number | All infectious syndromes | KP       | 2019 | 3893   | 5832   | 2518  |
| Deaths  | Sudan                                 | All | All Ages | All causes | Number | All infectious syndromes | KP       | 2019 | 3820   | 5512   | 2449  |
| Deaths  | Republic of Korea                     | All | All Ages | All causes | Number | All infectious syndromes | KP       | 2019 | 3737   | 5141   | 2660  |
| Deaths  | Colombia                              | All | All Ages | All causes | Number | All infectious syndromes | KP       | 2019 | 3475   | 5146   | 2246  |
| Deaths  | Peru                                  | All | All Ages | All causes | Number | All infectious syndromes | KP       | 2019 | 3311   | 4697   | 2274  |
| Deaths  | Yemen                                 | All | All Ages | All causes | Number | All infectious syndromes | KP       | 2019 | 3211   | 4697   | 2026  |
| Deaths  | Zimbabwe                              | All | All Ages | All causes | Number | All infectious syndromes | KP       | 2019 | 3132   | 4041   | 2421  |
| Deaths  | Malawi                                | All | All Ages | All causes | Number | All infectious syndromes | KP       | 2019 | 3069   | 3984   | 2316  |
| Deaths  | Iran (Islamic Republic of)            | All | All Ages | All causes | Number | All infectious syndromes | KP       | 2019 | 3020   | 4476   | 1992  |
| Deaths  | Morocco                               | All | All Ages | All causes | Number | All infectious syndromes | KP       | 2019 | 3020   | 4492   | 1903  |
| Deaths  | Uzbekistan                            | All | All Ages | All causes | Number | All infectious syndromes | KP       | 2019 | 2934   | 4210   | 2042  |
| Deaths  | Guinea                                | All | All Ages | All causes | Number | All infectious syndromes | KP       | 2019 | 2860   | 3817   | 2073  |
| Deaths  | Zambia                                | All | All Ages | All causes | Number | All infectious syndromes | KP       | 2019 | 2852   | 3799   | 2139  |
| Deaths  | Cambodia                              | All | All Ages | All causes | Number | All infectious syndromes | KP       | 2019 | 2816   | 3752   | 2094  |
| Deaths  | Benin                                 | All | All Ages | All causes | Number | All infectious syndromes | KP       | 2019 | 2786   | 3772   | 2000  |
| Deaths  | Romania                               | All | All Ages | All causes | Number | All infectious syndromes | KP       | 2019 | 2676   | 4031   | 1713  |
| Deaths  | Taiwan (Province of China)            | All | All Ages | All causes | Number | All infectious syndromes | KP       | 2019 | 2649   | 3760   | 1847  |
| Deaths  | Canada                                | All | All Ages | All causes | Number | All infectious syndromes | KP       | 2019 | 2623   | 3669   | 1822  |
| Deaths  | Malaysia                              | All | All Ages | All causes | Number | All infectious syndromes | KP       | 2019 | 2458   | 3363   | 1734  |
| Deaths  | Senegal                               | All | All Ages | All causes | Number | All infectious syndromes | KP       | 2019 | 2457   | 3257   | 1799  |
| Deaths  | Democratic People's Republic of Korea | All | All Ages | All causes | Number | All infectious syndromes | KP       | 2019 | 2455   | 3643   | 1577  |
| Deaths  | Algeria                               | All | All Ages | All causes | Number | All infectious syndromes | KP       | 2019 | 2449   | 3698   | 1563  |
| Deaths  | Burundi                               | All | All Ages | All causes | Number | All infectious syndromes | KP       | 2019 | 2158   | 2886   | 1543  |
| Deaths  | Guatemala                             | All | All Ages | All causes | Number | All infectious syndromes | KP       | 2019 | 2133   | 2976   | 1467  |
| Deaths  | Venezuela (Bolivarian Republic of)    | All | All Ages | All causes | Number | All infectious syndromes | KP       | 2019 | 2042   | 3108   | 1258  |
| Deaths  | Sierra Leone                          | All | All Ages | All causes | Number | All infectious syndromes | KP       | 2019 | 2013   | 2733   | 1467  |
| Deaths  | Bolivia (Plurinational State of)      | All | All Ages | All causes | Number | All infectious syndromes | KP       | 2019 | 1975   | 2690   | 1388  |
| Deaths  | Iraq                                  | All | All Ages | All causes | Number | All infectious syndromes | KP       | 2019 | 1929   | 2926   | 1203  |
| Deaths  | South Sudan                           | All | All Ages | All causes | Number | All infectious syndromes | KP       | 2019 | 1899   | 2507   | 1420  |

|        |                                  |     |          |            |        |                          |    |      |      |      |      |
|--------|----------------------------------|-----|----------|------------|--------|--------------------------|----|------|------|------|------|
| Deaths | Haiti                            | All | All Ages | All causes | Number | All infectious syndromes | KP | 2019 | 1876 | 2564 | 1331 |
| Deaths | Rwanda                           | All | All Ages | All causes | Number | All infectious syndromes | KP | 2019 | 1817 | 2412 | 1363 |
| Deaths | Ecuador                          | All | All Ages | All causes | Number | All infectious syndromes | KP | 2019 | 1731 | 2478 | 1172 |
| Deaths | Kazakhstan                       | All | All Ages | All causes | Number | All infectious syndromes | KP | 2019 | 1730 | 2555 | 1140 |
| Deaths | Netherlands                      | All | All Ages | All causes | Number | All infectious syndromes | KP | 2019 | 1698 | 2286 | 1230 |
| Deaths | Chile                            | All | All Ages | All causes | Number | All infectious syndromes | KP | 2019 | 1691 | 2307 | 1214 |
| Deaths | Central African Republic         | All | All Ages | All causes | Number | All infectious syndromes | KP | 2019 | 1566 | 2109 | 1138 |
| Deaths | Portugal                         | All | All Ages | All causes | Number | All infectious syndromes | KP | 2019 | 1529 | 2016 | 1151 |
| Deaths | Australia                        | All | All Ages | All causes | Number | All infectious syndromes | KP | 2019 | 1524 | 2147 | 1029 |
| Deaths | Papua New Guinea                 | All | All Ages | All causes | Number | All infectious syndromes | KP | 2019 | 1490 | 2056 | 1050 |
| Deaths | Saudi Arabia                     | All | All Ages | All causes | Number | All infectious syndromes | KP | 2019 | 1342 | 1999 | 889  |
| Deaths | Belgium                          | All | All Ages | All causes | Number | All infectious syndromes | KP | 2019 | 1329 | 1775 | 975  |
| Deaths | Sri Lanka                        | All | All Ages | All causes | Number | All infectious syndromes | KP | 2019 | 1241 | 1888 | 772  |
| Deaths | Togo                             | All | All Ages | All causes | Number | All infectious syndromes | KP | 2019 | 1217 | 1624 | 892  |
| Deaths | Hungary                          | All | All Ages | All causes | Number | All infectious syndromes | KP | 2019 | 1191 | 1797 | 735  |
| Deaths | Bulgaria                         | All | All Ages | All causes | Number | All infectious syndromes | KP | 2019 | 1183 | 1805 | 710  |
| Deaths | Greece                           | All | All Ages | All causes | Number | All infectious syndromes | KP | 2019 | 1183 | 1658 | 836  |
| Deaths | Eritrea                          | All | All Ages | All causes | Number | All infectious syndromes | KP | 2019 | 1170 | 1658 | 811  |
| Deaths | Dominican Republic               | All | All Ages | All causes | Number | All infectious syndromes | KP | 2019 | 1099 | 1611 | 693  |
| Deaths | Honduras                         | All | All Ages | All causes | Number | All infectious syndromes | KP | 2019 | 1093 | 1552 | 723  |
| Deaths | Serbia                           | All | All Ages | All causes | Number | All infectious syndromes | KP | 2019 | 1072 | 1629 | 652  |
| Deaths | Cuba                             | All | All Ages | All causes | Number | All infectious syndromes | KP | 2019 | 994  | 1420 | 696  |
| Deaths | Lao People's Democratic Republic | All | All Ages | All causes | Number | All infectious syndromes | KP | 2019 | 991  | 1375 | 699  |
| Deaths | Azerbaijan                       | All | All Ages | All causes | Number | All infectious syndromes | KP | 2019 | 964  | 1416 | 639  |
| Deaths | Czechia                          | All | All Ages | All causes | Number | All infectious syndromes | KP | 2019 | 897  | 1306 | 581  |
| Deaths | Syrian Arab Republic             | All | All Ages | All causes | Number | All infectious syndromes | KP | 2019 | 877  | 1312 | 565  |
| Deaths | Sweden                           | All | All Ages | All causes | Number | All infectious syndromes | KP | 2019 | 786  | 1109 | 546  |
| Deaths | Belarus                          | All | All Ages | All causes | Number | All infectious syndromes | KP | 2019 | 781  | 1239 | 475  |
| Deaths | Liberia                          | All | All Ages | All causes | Number | All infectious syndromes | KP | 2019 | 712  | 950  | 526  |
| Deaths | Congo                            | All | All Ages | All causes | Number | All infectious syndromes | KP | 2019 | 677  | 927  | 486  |
| Deaths | Tajikistan                       | All | All Ages | All causes | Number | All infectious syndromes | KP | 2019 | 669  | 947  | 466  |
| Deaths | Switzerland                      | All | All Ages | All causes | Number | All infectious syndromes | KP | 2019 | 661  | 904  | 460  |
| Deaths | Austria                          | All | All Ages | All causes | Number | All infectious syndromes | KP | 2019 | 660  | 972  | 431  |
| Deaths | El Salvador                      | All | All Ages | All causes | Number | All infectious syndromes | KP | 2019 | 657  | 959  | 420  |
| Deaths | Denmark                          | All | All Ages | All causes | Number | All infectious syndromes | KP | 2019 | 596  | 825  | 423  |
| Deaths | Israel                           | All | All Ages | All causes | Number | All infectious syndromes | KP | 2019 | 596  | 816  | 428  |
| Deaths | Paraguay                         | All | All Ages | All causes | Number | All infectious syndromes | KP | 2019 | 583  | 856  | 377  |
| Deaths | Slovakia                         | All | All Ages | All causes | Number | All infectious syndromes | KP | 2019 | 561  | 828  | 358  |
| Deaths | Lesotho                          | All | All Ages | All causes | Number | All infectious syndromes | KP | 2019 | 533  | 730  | 384  |
| Deaths | Uruguay                          | All | All Ages | All causes | Number | All infectious syndromes | KP | 2019 | 531  | 718  | 388  |
| Deaths | Georgia                          | All | All Ages | All causes | Number | All infectious syndromes | KP | 2019 | 511  | 771  | 312  |
| Deaths | Nicaragua                        | All | All Ages | All causes | Number | All infectious syndromes | KP | 2019 | 508  | 737  | 337  |
| Deaths | Mauritania                       | All | All Ages | All causes | Number | All infectious syndromes | KP | 2019 | 506  | 692  | 354  |
| Deaths | Tunisia                          | All | All Ages | All causes | Number | All infectious syndromes | KP | 2019 | 495  | 773  | 299  |
| Deaths | Republic of Moldova              | All | All Ages | All causes | Number | All infectious syndromes | KP | 2019 | 481  | 710  | 317  |
| Deaths | Turkmenistan                     | All | All Ages | All causes | Number | All infectious syndromes | KP | 2019 | 480  | 706  | 313  |
| Deaths | Kyrgyzstan                       | All | All Ages | All causes | Number | All infectious syndromes | KP | 2019 | 440  | 653  | 281  |
| Deaths | Finland                          | All | All Ages | All causes | Number | All infectious syndromes | KP | 2019 | 435  | 633  | 287  |
| Deaths | Mongolia                         | All | All Ages | All causes | Number | All infectious syndromes | KP | 2019 | 424  | 627  | 279  |
| Deaths | Puerto Rico                      | All | All Ages | All causes | Number | All infectious syndromes | KP | 2019 | 421  | 620  | 274  |
| Deaths | Norway                           | All | All Ages | All causes | Number | All infectious syndromes | KP | 2019 | 403  | 546  | 297  |
| Deaths | Croatia                          | All | All Ages | All causes | Number | All infectious syndromes | KP | 2019 | 391  | 578  | 245  |
| Deaths | Gambia                           | All | All Ages | All causes | Number | All infectious syndromes | KP | 2019 | 391  | 509  | 295  |
| Deaths | Guinea-Bissau                    | All | All Ages | All causes | Number | All infectious syndromes | KP | 2019 | 385  | 510  | 286  |
| Deaths | Libya                            | All | All Ages | All causes | Number | All infectious syndromes | KP | 2019 | 378  | 583  | 234  |
| Deaths | Armenia                          | All | All Ages | All causes | Number | All infectious syndromes | KP | 2019 | 361  | 516  | 237  |
| Deaths | Lithuania                        | All | All Ages | All causes | Number | All infectious syndromes | KP | 2019 | 357  | 538  | 227  |
| Deaths | Namibia                          | All | All Ages | All causes | Number | All infectious syndromes | KP | 2019 | 356  | 490  | 255  |
| Deaths | Costa Rica                       | All | All Ages | All causes | Number | All infectious syndromes | KP | 2019 | 354  | 525  | 224  |
| Deaths | Singapore                        | All | All Ages | All causes | Number | All infectious syndromes | KP | 2019 | 350  | 429  | 287  |
| Deaths | Botswana                         | All | All Ages | All causes | Number | All infectious syndromes | KP | 2019 | 341  | 477  | 247  |
| Deaths | Bosnia and Herzegovina           | All | All Ages | All causes | Number | All infectious syndromes | KP | 2019 | 327  | 504  | 191  |
| Deaths | Jordan                           | All | All Ages | All causes | Number | All infectious syndromes | KP | 2019 | 316  | 465  | 209  |
| Deaths | Ireland                          | All | All Ages | All causes | Number | All infectious syndromes | KP | 2019 | 315  | 430  | 226  |
| Deaths | New Zealand                      | All | All Ages | All causes | Number | All infectious syndromes | KP | 2019 | 301  | 434  | 204  |
| Deaths | Panama                           | All | All Ages | All causes | Number | All infectious syndromes | KP | 2019 | 290  | 428  | 186  |
| Deaths | Lebanon                          | All | All Ages | All causes | Number | All infectious syndromes | KP | 2019 | 285  | 428  | 186  |
| Deaths | United Arab Emirates             | All | All Ages | All causes | Number | All infectious syndromes | KP | 2019 | 284  | 460  | 168  |
| Deaths | Palestine                        | All | All Ages | All causes | Number | All infectious syndromes | KP | 2019 | 243  | 356  | 162  |
| Deaths | Latvia                           | All | All Ages | All causes | Number | All infectious syndromes | KP | 2019 | 237  | 354  | 152  |
| Deaths | Albania                          | All | All Ages | All causes | Number | All infectious syndromes | KP | 2019 | 214  | 336  | 125  |
| Deaths | Jamaica                          | All | All Ages | All causes | Number | All infectious syndromes | KP | 2019 | 213  | 316  | 134  |
| Deaths | Eswatini                         | All | All Ages | All causes | Number | All infectious syndromes | KP | 2019 | 201  | 276  | 144  |
| Deaths | Slovenia                         | All | All Ages | All causes | Number | All infectious syndromes | KP | 2019 | 197  | 303  | 125  |
| Deaths | North Macedonia                  | All | All Ages | All causes | Number | All infectious syndromes | KP | 2019 | 184  | 287  | 107  |
| Deaths | Djibouti                         | All | All Ages | All causes | Number | All infectious syndromes | KP | 2019 | 173  | 238  | 124  |

|        |                                  |     |          |            |        |                          |    |      |     |     |     |
|--------|----------------------------------|-----|----------|------------|--------|--------------------------|----|------|-----|-----|-----|
| Deaths | Gabon                            | All | All Ages | All causes | Number | All infectious syndromes | KP | 2019 | 170 | 237 | 122 |
| Deaths | Trinidad and Tobago              | All | All Ages | All causes | Number | All infectious syndromes | KP | 2019 | 163 | 248 | 99  |
| Deaths | Timor-Leste                      | All | All Ages | All causes | Number | All infectious syndromes | KP | 2019 | 136 | 184 | 98  |
| Deaths | Mauritius                        | All | All Ages | All causes | Number | All infectious syndromes | KP | 2019 | 136 | 205 | 83  |
| Deaths | Oman                             | All | All Ages | All causes | Number | All infectious syndromes | KP | 2019 | 117 | 172 | 78  |
| Deaths | Fiji                             | All | All Ages | All causes | Number | All infectious syndromes | KP | 2019 | 115 | 172 | 72  |
| Deaths | Guyana                           | All | All Ages | All causes | Number | All infectious syndromes | KP | 2019 | 112 | 164 | 72  |
| Deaths | Kuwait                           | All | All Ages | All causes | Number | All infectious syndromes | KP | 2019 | 112 | 160 | 79  |
| Deaths | Solomon Islands                  | All | All Ages | All causes | Number | All infectious syndromes | KP | 2019 | 111 | 151 | 83  |
| Deaths | Estonia                          | All | All Ages | All causes | Number | All infectious syndromes | KP | 2019 | 108 | 165 | 67  |
| Deaths | Equatorial Guinea                | All | All Ages | All causes | Number | All infectious syndromes | KP | 2019 | 100 | 144 | 67  |
| Deaths | Comoros                          | All | All Ages | All causes | Number | All infectious syndromes | KP | 2019 | 100 | 132 | 74  |
| Deaths | Cyprus                           | All | All Ages | All causes | Number | All infectious syndromes | KP | 2019 | 88  | 125 | 62  |
| Deaths | Bhutan                           | All | All Ages | All causes | Number | All infectious syndromes | KP | 2019 | 64  | 95  | 43  |
| Deaths | Suriname                         | All | All Ages | All causes | Number | All infectious syndromes | KP | 2019 | 61  | 87  | 41  |
| Deaths | Barbados                         | All | All Ages | All causes | Number | All infectious syndromes | KP | 2019 | 52  | 72  | 37  |
| Deaths | Bahrain                          | All | All Ages | All causes | Number | All infectious syndromes | KP | 2019 | 51  | 79  | 32  |
| Deaths | Montenegro                       | All | All Ages | All causes | Number | All infectious syndromes | KP | 2019 | 46  | 70  | 28  |
| Deaths | Cabo Verde                       | All | All Ages | All causes | Number | All infectious syndromes | KP | 2019 | 46  | 63  | 34  |
| Deaths | Qatar                            | All | All Ages | All causes | Number | All infectious syndromes | KP | 2019 | 43  | 69  | 25  |
| Deaths | Luxembourg                       | All | All Ages | All causes | Number | All infectious syndromes | KP | 2019 | 41  | 58  | 28  |
| Deaths | Bahamas                          | All | All Ages | All causes | Number | All infectious syndromes | KP | 2019 | 39  | 56  | 26  |
| Deaths | Malta                            | All | All Ages | All causes | Number | All infectious syndromes | KP | 2019 | 36  | 49  | 26  |
| Deaths | Vanuatu                          | All | All Ages | All causes | Number | All infectious syndromes | KP | 2019 | 31  | 45  | 21  |
| Deaths | Sao Tome and Principe            | All | All Ages | All causes | Number | All infectious syndromes | KP | 2019 | 26  | 35  | 19  |
| Deaths | Belize                           | All | All Ages | All causes | Number | All infectious syndromes | KP | 2019 | 25  | 35  | 17  |
| Deaths | Kiribati                         | All | All Ages | All causes | Number | All infectious syndromes | KP | 2019 | 20  | 29  | 14  |
| Deaths | Brunei Darussalam                | All | All Ages | All causes | Number | All infectious syndromes | KP | 2019 | 20  | 28  | 13  |
| Deaths | Iceland                          | All | All Ages | All causes | Number | All infectious syndromes | KP | 2019 | 18  | 25  | 13  |
| Deaths | Saint Lucia                      | All | All Ages | All causes | Number | All infectious syndromes | KP | 2019 | 17  | 24  | 11  |
| Deaths | Samoa                            | All | All Ages | All causes | Number | All infectious syndromes | KP | 2019 | 16  | 23  | 10  |
| Deaths | United States Virgin Islands     | All | All Ages | All causes | Number | All infectious syndromes | KP | 2019 | 16  | 23  | 11  |
| Deaths | Tonga                            | All | All Ages | All causes | Number | All infectious syndromes | KP | 2019 | 14  | 19  | 9   |
| Deaths | Maldives                         | All | All Ages | All causes | Number | All infectious syndromes | KP | 2019 | 13  | 19  | 8   |
| Deaths | Micronesia (Federated States of) | All | All Ages | All causes | Number | All infectious syndromes | KP | 2019 | 13  | 20  | 9   |
| Deaths | Saint Vincent and the Grenadines | All | All Ages | All causes | Number | All infectious syndromes | KP | 2019 | 12  | 17  | 8   |
| Deaths | Seychelles                       | All | All Ages | All causes | Number | All infectious syndromes | KP | 2019 | 12  | 16  | 9   |
| Deaths | Grenada                          | All | All Ages | All causes | Number | All infectious syndromes | KP | 2019 | 11  | 15  | 7   |
| Deaths | Guam                             | All | All Ages | All causes | Number | All infectious syndromes | KP | 2019 | 11  | 16  | 7   |
| Deaths | Dominica                         | All | All Ages | All causes | Number | All infectious syndromes | KP | 2019 | 9   | 13  | 6   |
| Deaths | Marshall Islands                 | All | All Ages | All causes | Number | All infectious syndromes | KP | 2019 | 7   | 10  | 5   |
| Deaths | Antigua and Barbuda              | All | All Ages | All causes | Number | All infectious syndromes | KP | 2019 | 7   | 10  | 5   |
| Deaths | Greenland                        | All | All Ages | All causes | Number | All infectious syndromes | KP | 2019 | 7   | 10  | 4   |
| Deaths | Andorra                          | All | All Ages | All causes | Number | All infectious syndromes | KP | 2019 | 6   | 9   | 4   |
| Deaths | Saint Kitts and Nevis            | All | All Ages | All causes | Number | All infectious syndromes | KP | 2019 | 6   | 8   | 4   |
| Deaths | American Samoa                   | All | All Ages | All causes | Number | All infectious syndromes | KP | 2019 | 5   | 7   | 3   |
| Deaths | Monaco                           | All | All Ages | All causes | Number | All infectious syndromes | KP | 2019 | 5   | 7   | 3   |
| Deaths | Bermuda                          | All | All Ages | All causes | Number | All infectious syndromes | KP | 2019 | 4   | 6   | 3   |
| Deaths | Northern Mariana Islands         | All | All Ages | All causes | Number | All infectious syndromes | KP | 2019 | 4   | 5   | 2   |
| Deaths | Palau                            | All | All Ages | All causes | Number | All infectious syndromes | KP | 2019 | 3   | 5   | 2   |
| Deaths | San Marino                       | All | All Ages | All causes | Number | All infectious syndromes | KP | 2019 | 3   | 4   | 2   |
| Deaths | Cook Islands                     | All | All Ages | All causes | Number | All infectious syndromes | KP | 2019 | 2   | 2   | 1   |
| Deaths | Nauru                            | All | All Ages | All causes | Number | All infectious syndromes | KP | 2019 | 1   | 1   | 1   |
| Deaths | Tuvalu                           | All | All Ages | All causes | Number | All infectious syndromes | KP | 2019 | 1   | 2   | 1   |
| Deaths | Niue                             | All | All Ages | All causes | Number | All infectious syndromes | KP | 2019 | 0   | 0   | 0   |
| Deaths | Tokelau                          | All | All Ages | All causes | Number | All infectious syndromes | KP | 2019 | 0   | 0   | 0   |

Figure 1B Global age-standardised mortality rates associated with *Klebsiella pneumoniae* infection in 204 countries and territories

| measure | location                         | sex | age              | cause      | metric | infectious syndrome      | pathogen | year | value<br>(per 100,000) | upper<br>(per 100,000) | lower<br>(per 100,000) |
|---------|----------------------------------|-----|------------------|------------|--------|--------------------------|----------|------|------------------------|------------------------|------------------------|
| Deaths  | Central African Republic         | All | Age-standardized | All causes | Rate   | All infectious syndromes | KP       | 2019 | 41.01                  | 55.90                  | 29.24                  |
| Deaths  | Lesotho                          | All | Age-standardized | All causes | Rate   | All infectious syndromes | KP       | 2019 | 40.09                  | 55.26                  | 28.56                  |
| Deaths  | Guinea-Bissau                    | All | Age-standardized | All causes | Rate   | All infectious syndromes | KP       | 2019 | 36.35                  | 48.22                  | 27.25                  |
| Deaths  | Eritrea                          | All | Age-standardized | All causes | Rate   | All infectious syndromes | KP       | 2019 | 35.90                  | 50.98                  | 25.35                  |
| Deaths  | Zimbabwe                         | All | Age-standardized | All causes | Rate   | All infectious syndromes | KP       | 2019 | 35.23                  | 46.03                  | 26.76                  |
| Deaths  | Burkina Faso                     | All | Age-standardized | All causes | Rate   | All infectious syndromes | KP       | 2019 | 35.04                  | 45.12                  | 26.92                  |
| Deaths  | Solomon Islands                  | All | Age-standardized | All causes | Rate   | All infectious syndromes | KP       | 2019 | 33.46                  | 45.93                  | 24.72                  |
| Deaths  | Sierra Leone                     | All | Age-standardized | All causes | Rate   | All infectious syndromes | KP       | 2019 | 32.33                  | 44.08                  | 23.67                  |
| Deaths  | Mali                             | All | Age-standardized | All causes | Rate   | All infectious syndromes | KP       | 2019 | 32.02                  | 43.60                  | 22.96                  |
| Deaths  | Afghanistan                      | All | Age-standardized | All causes | Rate   | All infectious syndromes | KP       | 2019 | 31.98                  | 44.18                  | 22.27                  |
| Deaths  | Niger                            | All | Age-standardized | All causes | Rate   | All infectious syndromes | KP       | 2019 | 31.85                  | 41.98                  | 23.63                  |
| Deaths  | Gambia                           | All | Age-standardized | All causes | Rate   | All infectious syndromes | KP       | 2019 | 31.42                  | 40.73                  | 23.77                  |
| Deaths  | Kiribati                         | All | Age-standardized | All causes | Rate   | All infectious syndromes | KP       | 2019 | 31.38                  | 45.20                  | 21.18                  |
| Deaths  | Mozambique                       | All | Age-standardized | All causes | Rate   | All infectious syndromes | KP       | 2019 | 31.08                  | 41.12                  | 23.15                  |
| Deaths  | Burundi                          | All | Age-standardized | All causes | Rate   | All infectious syndromes | KP       | 2019 | 30.87                  | 41.04                  | 22.48                  |
| Deaths  | Somalia                          | All | Age-standardized | All causes | Rate   | All infectious syndromes | KP       | 2019 | 30.83                  | 42.81                  | 21.98                  |
| Deaths  | Eswatini                         | All | Age-standardized | All causes | Rate   | All infectious syndromes | KP       | 2019 | 30.79                  | 43.09                  | 21.36                  |
| Deaths  | Benin                            | All | Age-standardized | All causes | Rate   | All infectious syndromes | KP       | 2019 | 29.40                  | 39.24                  | 21.55                  |
| Deaths  | Zambia                           | All | Age-standardized | All causes | Rate   | All infectious syndromes | KP       | 2019 | 29.29                  | 39.31                  | 21.68                  |
| Deaths  | Malawi                           | All | Age-standardized | All causes | Rate   | All infectious syndromes | KP       | 2019 | 28.84                  | 37.33                  | 21.92                  |
| Deaths  | Chad                             | All | Age-standardized | All causes | Rate   | All infectious syndromes | KP       | 2019 | 28.75                  | 37.96                  | 21.87                  |
| Deaths  | Madagascar                       | All | Age-standardized | All causes | Rate   | All infectious syndromes | KP       | 2019 | 28.63                  | 38.35                  | 20.50                  |
| Deaths  | Guinea                           | All | Age-standardized | All causes | Rate   | All infectious syndromes | KP       | 2019 | 28.30                  | 37.77                  | 20.66                  |
| Deaths  | Côte d'Ivoire                    | All | Age-standardized | All causes | Rate   | All infectious syndromes | KP       | 2019 | 28.29                  | 37.60                  | 21.23                  |
| Deaths  | Democratic Republic of the Congo | All | Age-standardized | All causes | Rate   | All infectious syndromes | KP       | 2019 | 28.16                  | 38.12                  | 20.63                  |
| Deaths  | Kenya                            | All | Age-standardized | All causes | Rate   | All infectious syndromes | KP       | 2019 | 28.04                  | 36.73                  | 21.60                  |
| Deaths  | Togo                             | All | Age-standardized | All causes | Rate   | All infectious syndromes | KP       | 2019 | 26.76                  | 35.81                  | 20.11                  |
| Deaths  | Cameroon                         | All | Age-standardized | All causes | Rate   | All infectious syndromes | KP       | 2019 | 26.68                  | 35.70                  | 19.56                  |
| Deaths  | Nigeria                          | All | Age-standardized | All causes | Rate   | All infectious syndromes | KP       | 2019 | 26.53                  | 35.25                  | 19.66                  |
| Deaths  | Ghana                            | All | Age-standardized | All causes | Rate   | All infectious syndromes | KP       | 2019 | 26.03                  | 34.21                  | 20.05                  |
| Deaths  | Liberia                          | All | Age-standardized | All causes | Rate   | All infectious syndromes | KP       | 2019 | 25.92                  | 35.05                  | 19.13                  |
| Deaths  | Cambodia                         | All | Age-standardized | All causes | Rate   | All infectious syndromes | KP       | 2019 | 25.69                  | 34.09                  | 19.18                  |
| Deaths  | Ethiopia                         | All | Age-standardized | All causes | Rate   | All infectious syndromes | KP       | 2019 | 25.64                  | 32.97                  | 19.55                  |
| Deaths  | Uganda                           | All | Age-standardized | All causes | Rate   | All infectious syndromes | KP       | 2019 | 25.64                  | 33.64                  | 19.21                  |
| Deaths  | United Republic of Tanzania      | All | Age-standardized | All causes | Rate   | All infectious syndromes | KP       | 2019 | 25.63                  | 33.82                  | 19.40                  |
| Deaths  | Rwanda                           | All | Age-standardized | All causes | Rate   | All infectious syndromes | KP       | 2019 | 25.61                  | 33.64                  | 19.31                  |
| Deaths  | Sao Tome and Principe            | All | Age-standardized | All causes | Rate   | All infectious syndromes | KP       | 2019 | 25.20                  | 33.05                  | 18.33                  |
| Deaths  | Congo                            | All | Age-standardized | All causes | Rate   | All infectious syndromes | KP       | 2019 | 25.02                  | 34.17                  | 18.11                  |
| Deaths  | Senegal                          | All | Age-standardized | All causes | Rate   | All infectious syndromes | KP       | 2019 | 24.77                  | 33.64                  | 18.19                  |
| Deaths  | Botswana                         | All | Age-standardized | All causes | Rate   | All infectious syndromes | KP       | 2019 | 24.51                  | 34.46                  | 17.69                  |
| Deaths  | South Sudan                      | All | Age-standardized | All causes | Rate   | All infectious syndromes | KP       | 2019 | 24.43                  | 32.66                  | 18.19                  |
| Deaths  | Djibouti                         | All | Age-standardized | All causes | Rate   | All infectious syndromes | KP       | 2019 | 24.18                  | 33.17                  | 17.53                  |
| Deaths  | Angola                           | All | Age-standardized | All causes | Rate   | All infectious syndromes | KP       | 2019 | 24.01                  | 32.24                  | 17.63                  |
| Deaths  | Namibia                          | All | Age-standardized | All causes | Rate   | All infectious syndromes | KP       | 2019 | 23.46                  | 32.04                  | 16.76                  |
| Deaths  | Pakistan                         | All | Age-standardized | All causes | Rate   | All infectious syndromes | KP       | 2019 | 23.36                  | 32.48                  | 15.75                  |
| Deaths  | Micronesia (Federated States of) | All | Age-standardized | All causes | Rate   | All infectious syndromes | KP       | 2019 | 23.21                  | 33.57                  | 15.51                  |
| Deaths  | Marshall Islands                 | All | Age-standardized | All causes | Rate   | All infectious syndromes | KP       | 2019 | 23.00                  | 33.88                  | 15.33                  |
| Deaths  | Bolivia (Plurinational State of) | All | Age-standardized | All causes | Rate   | All infectious syndromes | KP       | 2019 | 22.56                  | 30.51                  | 15.76                  |
| Deaths  | Haiti                            | All | Age-standardized | All causes | Rate   | All infectious syndromes | KP       | 2019 | 21.87                  | 30.87                  | 15.12                  |
| Deaths  | Lao People's Democratic Republic | All | Age-standardized | All causes | Rate   | All infectious syndromes | KP       | 2019 | 21.80                  | 30.26                  | 15.64                  |
| Deaths  | Papua New Guinea                 | All | Age-standardized | All causes | Rate   | All infectious syndromes | KP       | 2019 | 21.74                  | 30.86                  | 14.56                  |
| Deaths  | Mongolia                         | All | Age-standardized | All causes | Rate   | All infectious syndromes | KP       | 2019 | 20.38                  | 29.92                  | 13.32                  |
| Deaths  | Mauritania                       | All | Age-standardized | All causes | Rate   | All infectious syndromes | KP       | 2019 | 20.26                  | 27.54                  | 14.54                  |
| Deaths  | Guyana                           | All | Age-standardized | All causes | Rate   | All infectious syndromes | KP       | 2019 | 19.75                  | 28.44                  | 12.88                  |
| Deaths  | Myanmar                          | All | Age-standardized | All causes | Rate   | All infectious syndromes | KP       | 2019 | 19.70                  | 28.42                  | 13.49                  |
| Deaths  | Nepal                            | All | Age-standardized | All causes | Rate   | All infectious syndromes | KP       | 2019 | 19.54                  | 28.01                  | 13.51                  |
| Deaths  | Comoros                          | All | Age-standardized | All causes | Rate   | All infectious syndromes | KP       | 2019 | 19.31                  | 25.91                  | 14.36                  |
| Deaths  | Palau                            | All | Age-standardized | All causes | Rate   | All infectious syndromes | KP       | 2019 | 19.25                  | 27.22                  | 13.77                  |
| Deaths  | Guatemala                        | All | Age-standardized | All causes | Rate   | All infectious syndromes | KP       | 2019 | 18.98                  | 26.43                  | 13.29                  |
| Deaths  | Fiji                             | All | Age-standardized | All causes | Rate   | All infectious syndromes | KP       | 2019 | 18.77                  | 27.71                  | 11.91                  |
| Deaths  | Honduras                         | All | Age-standardized | All causes | Rate   | All infectious syndromes | KP       | 2019 | 18.75                  | 26.46                  | 12.43                  |
| Deaths  | Vanuatu                          | All | Age-standardized | All causes | Rate   | All infectious syndromes | KP       | 2019 | 18.16                  | 26.41                  | 11.94                  |
| Deaths  | South Africa                     | All | Age-standardized | All causes | Rate   | All infectious syndromes | KP       | 2019 | 17.76                  | 23.28                  | 13.27                  |
| Deaths  | Philippines                      | All | Age-standardized | All causes | Rate   | All infectious syndromes | KP       | 2019 | 17.02                  | 22.92                  | 12.68                  |
| Deaths  | Yemen                            | All | Age-standardized | All causes | Rate   | All infectious syndromes | KP       | 2019 | 16.93                  | 25.11                  | 10.97                  |
| Deaths  | Tonga                            | All | Age-standardized | All causes | Rate   | All infectious syndromes | KP       | 2019 | 16.75                  | 23.38                  | 11.40                  |
| Deaths  | Nauru                            | All | Age-standardized | All causes | Rate   | All infectious syndromes | KP       | 2019 | 16.72                  | 24.39                  | 11.48                  |
| Deaths  | Gabon                            | All | Age-standardized | All causes | Rate   | All infectious syndromes | KP       | 2019 | 16.45                  | 22.63                  | 11.91                  |
| Deaths  | Equatorial Guinea                | All | Age-standardized | All causes | Rate   | All infectious syndromes | KP       | 2019 | 15.73                  | 22.45                  | 10.76                  |
| Deaths  | Egypt                            | All | Age-standardized | All causes | Rate   | All infectious syndromes | KP       | 2019 | 15.64                  | 23.13                  | 9.62                   |
| Deaths  | Timor-Leste                      | All | Age-standardized | All causes | Rate   | All infectious syndromes | KP       | 2019 | 15.47                  | 21.53                  | 11.00                  |
| Deaths  | Uzbekistan                       | All | Age-standardized | All causes | Rate   | All infectious syndromes | KP       | 2019 | 15.41                  | 22.68                  | 10.25                  |
| Deaths  | Sudan                            | All | Age-standardized | All causes | Rate   | All infectious syndromes | KP       | 2019 | 14.81                  | 21.36                  | 9.51                   |
| Deaths  | Tuvalu                           | All | Age-standardized | All causes | Rate   | All infectious syndromes | KP       | 2019 | 14.14                  | 21.18                  | 9.12                   |
| Deaths  | Indonesia                        | All | Age-standardized | All causes | Rate   | All infectious syndromes | KP       | 2019 | 14.03                  | 19.63                  | 9.57                   |

|        |                                       |     |                  |            |      |                          |    |      |       |       |      |
|--------|---------------------------------------|-----|------------------|------------|------|--------------------------|----|------|-------|-------|------|
| Deaths | Azerbaijan                            | All | Age-standardized | All causes | Rate | All infectious syndromes | KP | 2019 | 13.68 | 20.10 | 9.00 |
| Deaths | Bangladesh                            | All | Age-standardized | All causes | Rate | All infectious syndromes | KP | 2019 | 13.47 | 19.44 | 9.22 |
| Deaths | Niue                                  | All | Age-standardized | All causes | Rate | All infectious syndromes | KP | 2019 | 13.43 | 19.27 | 8.93 |
| Deaths | India                                 | All | Age-standardized | All causes | Rate | All infectious syndromes | KP | 2019 | 13.17 | 18.31 | 9.15 |
| Deaths | Seychelles                            | All | Age-standardized | All causes | Rate | All infectious syndromes | KP | 2019 | 12.77 | 16.81 | 9.61 |
| Deaths | Tajikistan                            | All | Age-standardized | All causes | Rate | All infectious syndromes | KP | 2019 | 12.62 | 18.50 | 8.47 |
| Deaths | Ecuador                               | All | Age-standardized | All causes | Rate | All infectious syndromes | KP | 2019 | 12.46 | 17.87 | 8.48 |
| Deaths | Argentina                             | All | Age-standardized | All causes | Rate | All infectious syndromes | KP | 2019 | 12.44 | 16.10 | 9.54 |
| Deaths | United Arab Emirates                  | All | Age-standardized | All causes | Rate | All infectious syndromes | KP | 2019 | 12.27 | 17.50 | 8.55 |
| Deaths | Nicaragua                             | All | Age-standardized | All causes | Rate | All infectious syndromes | KP | 2019 | 12.17 | 17.75 | 8.03 |
| Deaths | Bhutan                                | All | Age-standardized | All causes | Rate | All infectious syndromes | KP | 2019 | 12.15 | 17.96 | 8.16 |
| Deaths | Dominican Republic                    | All | Age-standardized | All causes | Rate | All infectious syndromes | KP | 2019 | 11.81 | 17.38 | 7.44 |
| Deaths | Samoa                                 | All | Age-standardized | All causes | Rate | All infectious syndromes | KP | 2019 | 11.76 | 17.01 | 7.75 |
| Deaths | Turkmenistan                          | All | Age-standardized | All causes | Rate | All infectious syndromes | KP | 2019 | 11.71 | 17.59 | 7.54 |
| Deaths | Brazil                                | All | Age-standardized | All causes | Rate | All infectious syndromes | KP | 2019 | 11.65 | 15.57 | 8.62 |
| Deaths | Mexico                                | All | Age-standardized | All causes | Rate | All infectious syndromes | KP | 2019 | 11.64 | 16.73 | 7.76 |
| Deaths | Greenland                             | All | Age-standardized | All causes | Rate | All infectious syndromes | KP | 2019 | 11.63 | 16.63 | 7.56 |
| Deaths | Morocco                               | All | Age-standardized | All causes | Rate | All infectious syndromes | KP | 2019 | 11.62 | 17.11 | 7.37 |
| Deaths | Barbados                              | All | Age-standardized | All causes | Rate | All infectious syndromes | KP | 2019 | 11.43 | 15.77 | 7.96 |
| Deaths | Suriname                              | All | Age-standardized | All causes | Rate | All infectious syndromes | KP | 2019 | 11.33 | 16.00 | 7.61 |
| Deaths | Bahamas                               | All | Age-standardized | All causes | Rate | All infectious syndromes | KP | 2019 | 11.26 | 16.28 | 7.68 |
| Deaths | Dominica                              | All | Age-standardized | All causes | Rate | All infectious syndromes | KP | 2019 | 11.04 | 15.90 | 7.17 |
| Deaths | American Samoa                        | All | Age-standardized | All causes | Rate | All infectious syndromes | KP | 2019 | 11.01 | 15.84 | 7.29 |
| Deaths | Grenada                               | All | Age-standardized | All causes | Rate | All infectious syndromes | KP | 2019 | 10.96 | 15.12 | 7.74 |
| Deaths | Kazakhstan                            | All | Age-standardized | All causes | Rate | All infectious syndromes | KP | 2019 | 10.91 | 16.24 | 7.08 |
| Deaths | Palestine                             | All | Age-standardized | All causes | Rate | All infectious syndromes | KP | 2019 | 10.85 | 16.05 | 7.24 |
| Deaths | Malaysia                              | All | Age-standardized | All causes | Rate | All infectious syndromes | KP | 2019 | 10.76 | 14.54 | 7.66 |
| Deaths | Cabo Verde                            | All | Age-standardized | All causes | Rate | All infectious syndromes | KP | 2019 | 10.75 | 14.65 | 7.81 |
| Deaths | Paraguay                              | All | Age-standardized | All causes | Rate | All infectious syndromes | KP | 2019 | 10.71 | 15.64 | 6.96 |
| Deaths | El Salvador                           | All | Age-standardized | All causes | Rate | All infectious syndromes | KP | 2019 | 10.59 | 15.54 | 6.81 |
| Deaths | Peru                                  | All | Age-standardized | All causes | Rate | All infectious syndromes | KP | 2019 | 10.22 | 14.50 | 7.00 |
| Deaths | Saint Vincent and the Grenadines      | All | Age-standardized | All causes | Rate | All infectious syndromes | KP | 2019 | 10.18 | 14.47 | 6.85 |
| Deaths | Saint Kitts and Nevis                 | All | Age-standardized | All causes | Rate | All infectious syndromes | KP | 2019 | 10.00 | 13.99 | 6.95 |
| Deaths | Brunei Darussalam                     | All | Age-standardized | All causes | Rate | All infectious syndromes | KP | 2019 | 9.95  | 13.53 | 7.19 |
| Deaths | Tokelau                               | All | Age-standardized | All causes | Rate | All infectious syndromes | KP | 2019 | 9.91  | 14.61 | 6.40 |
| Deaths | Trinidad and Tobago                   | All | Age-standardized | All causes | Rate | All infectious syndromes | KP | 2019 | 9.81  | 14.96 | 5.96 |
| Deaths | Bahrain                               | All | Age-standardized | All causes | Rate | All infectious syndromes | KP | 2019 | 9.63  | 14.43 | 6.33 |
| Deaths | Qatar                                 | All | Age-standardized | All causes | Rate | All infectious syndromes | KP | 2019 | 9.61  | 14.67 | 6.13 |
| Deaths | Saudi Arabia                          | All | Age-standardized | All causes | Rate | All infectious syndromes | KP | 2019 | 9.61  | 13.79 | 6.66 |
| Deaths | Armenia                               | All | Age-standardized | All causes | Rate | All infectious syndromes | KP | 2019 | 9.57  | 13.59 | 6.37 |
| Deaths | United States Virgin Islands          | All | Age-standardized | All causes | Rate | All infectious syndromes | KP | 2019 | 9.54  | 13.69 | 6.37 |
| Deaths | Kyrgyzstan                            | All | Age-standardized | All causes | Rate | All infectious syndromes | KP | 2019 | 9.46  | 14.26 | 5.97 |
| Deaths | Belize                                | All | Age-standardized | All causes | Rate | All infectious syndromes | KP | 2019 | 9.37  | 13.05 | 6.51 |
| Deaths | Oman                                  | All | Age-standardized | All causes | Rate | All infectious syndromes | KP | 2019 | 9.25  | 13.35 | 6.47 |
| Deaths | Republic of Moldova                   | All | Age-standardized | All causes | Rate | All infectious syndromes | KP | 2019 | 9.16  | 13.35 | 6.09 |
| Deaths | Uruguay                               | All | Age-standardized | All causes | Rate | All infectious syndromes | KP | 2019 | 9.05  | 12.29 | 6.54 |
| Deaths | Northern Mariana Islands              | All | Age-standardized | All causes | Rate | All infectious syndromes | KP | 2019 | 8.98  | 12.91 | 6.05 |
| Deaths | Syrian Arab Republic                  | All | Age-standardized | All causes | Rate | All infectious syndromes | KP | 2019 | 8.95  | 13.26 | 5.78 |
| Deaths | Mauritius                             | All | Age-standardized | All causes | Rate | All infectious syndromes | KP | 2019 | 8.86  | 13.35 | 5.51 |
| Deaths | Georgia                               | All | Age-standardized | All causes | Rate | All infectious syndromes | KP | 2019 | 8.82  | 13.20 | 5.39 |
| Deaths | Algeria                               | All | Age-standardized | All causes | Rate | All infectious syndromes | KP | 2019 | 8.71  | 13.06 | 5.67 |
| Deaths | Bulgaria                              | All | Age-standardized | All causes | Rate | All infectious syndromes | KP | 2019 | 8.68  | 13.23 | 5.19 |
| Deaths | Democratic People's Republic of Korea | All | Age-standardized | All causes | Rate | All infectious syndromes | KP | 2019 | 8.67  | 12.79 | 5.64 |
| Deaths | Saint Lucia                           | All | Age-standardized | All causes | Rate | All infectious syndromes | KP | 2019 | 8.60  | 12.37 | 5.67 |
| Deaths | Iraq                                  | All | Age-standardized | All causes | Rate | All infectious syndromes | KP | 2019 | 8.34  | 12.70 | 5.14 |
| Deaths | Libya                                 | All | Age-standardized | All causes | Rate | All infectious syndromes | KP | 2019 | 8.26  | 12.56 | 5.16 |
| Deaths | Viet Nam                              | All | Age-standardized | All causes | Rate | All infectious syndromes | KP | 2019 | 7.86  | 11.55 | 5.29 |
| Deaths | Russian Federation                    | All | Age-standardized | All causes | Rate | All infectious syndromes | KP | 2019 | 7.85  | 11.38 | 5.19 |
| Deaths | Antigua and Barbuda                   | All | Age-standardized | All causes | Rate | All infectious syndromes | KP | 2019 | 7.85  | 11.03 | 5.39 |
| Deaths | Romania                               | All | Age-standardized | All causes | Rate | All infectious syndromes | KP | 2019 | 7.63  | 11.44 | 4.89 |
| Deaths | Venezuela (Bolivarian Republic of)    | All | Age-standardized | All causes | Rate | All infectious syndromes | KP | 2019 | 7.49  | 11.37 | 4.65 |
| Deaths | Chile                                 | All | Age-standardized | All causes | Rate | All infectious syndromes | KP | 2019 | 7.27  | 9.92  | 5.22 |
| Deaths | Jamaica                               | All | Age-standardized | All causes | Rate | All infectious syndromes | KP | 2019 | 7.17  | 10.67 | 4.46 |
| Deaths | Serbia                                | All | Age-standardized | All causes | Rate | All infectious syndromes | KP | 2019 | 7.15  | 10.95 | 4.31 |
| Deaths | Costa Rica                            | All | Age-standardized | All causes | Rate | All infectious syndromes | KP | 2019 | 7.01  | 10.39 | 4.42 |
| Deaths | Panama                                | All | Age-standardized | All causes | Rate | All infectious syndromes | KP | 2019 | 6.95  | 10.25 | 4.46 |
| Deaths | Ukraine                               | All | Age-standardized | All causes | Rate | All infectious syndromes | KP | 2019 | 6.94  | 10.40 | 4.20 |
| Deaths | Turkey                                | All | Age-standardized | All causes | Rate | All infectious syndromes | KP | 2019 | 6.94  | 10.46 | 4.53 |
| Deaths | Thailand                              | All | Age-standardized | All causes | Rate | All infectious syndromes | KP | 2019 | 6.87  | 9.90  | 4.50 |
| Deaths | Taiwan (Province of China)            | All | Age-standardized | All causes | Rate | All infectious syndromes | KP | 2019 | 6.76  | 9.70  | 4.69 |
| Deaths | North Macedonia                       | All | Age-standardized | All causes | Rate | All infectious syndromes | KP | 2019 | 6.73  | 10.52 | 3.92 |
| Deaths | Colombia                              | All | Age-standardized | All causes | Rate | All infectious syndromes | KP | 2019 | 6.68  | 9.85  | 4.31 |
| Deaths | Cook Islands                          | All | Age-standardized | All causes | Rate | All infectious syndromes | KP | 2019 | 6.60  | 9.36  | 4.46 |
| Deaths | Slovakia                              | All | Age-standardized | All causes | Rate | All infectious syndromes | KP | 2019 | 6.44  | 9.53  | 4.08 |
| Deaths | Lithuania                             | All | Age-standardized | All causes | Rate | All infectious syndromes | KP | 2019 | 6.35  | 9.59  | 4.03 |
| Deaths | Hungary                               | All | Age-standardized | All causes | Rate | All infectious syndromes | KP | 2019 | 6.32  | 9.57  | 3.86 |
| Deaths | Guam                                  | All | Age-standardized | All causes | Rate | All infectious syndromes | KP | 2019 | 6.10  | 8.77  | 3.97 |
| Deaths | Latvia                                | All | Age-standardized | All causes | Rate | All infectious syndromes | KP | 2019 | 6.06  | 9.10  | 3.86 |
| Deaths | Bosnia and Herzegovina                | All | Age-standardized | All causes | Rate | All infectious syndromes | KP | 2019 | 5.91  | 9.23  | 3.44 |
| Deaths | Puerto Rico                           | All | Age-standardized | All causes | Rate | All infectious syndromes | KP | 2019 | 5.88  | 8.79  | 3.75 |



|        |                            |     |                  |            |      |                          |    |      |      |      |      |
|--------|----------------------------|-----|------------------|------------|------|--------------------------|----|------|------|------|------|
| Deaths | United Kingdom             | All | Age-standardized | All causes | Rate | All infectious syndromes | KP | 2019 | 5.72 | 7.69 | 4.20 |
| Deaths | Portugal                   | All | Age-standardized | All causes | Rate | All infectious syndromes | KP | 2019 | 5.67 | 7.58 | 4.20 |
| Deaths | Poland                     | All | Age-standardized | All causes | Rate | All infectious syndromes | KP | 2019 | 5.66 | 8.56 | 3.62 |
| Deaths | Sri Lanka                  | All | Age-standardized | All causes | Rate | All infectious syndromes | KP | 2019 | 5.62 | 8.57 | 3.52 |
| Deaths | Lebanon                    | All | Age-standardized | All causes | Rate | All infectious syndromes | KP | 2019 | 5.57 | 8.42 | 3.64 |
| Deaths | Albania                    | All | Age-standardized | All causes | Rate | All infectious syndromes | KP | 2019 | 5.53 | 8.59 | 3.30 |
| Deaths | Jordan                     | All | Age-standardized | All causes | Rate | All infectious syndromes | KP | 2019 | 5.40 | 7.94 | 3.61 |
| Deaths | United States of America   | All | Age-standardized | All causes | Rate | All infectious syndromes | KP | 2019 | 5.34 | 7.61 | 3.65 |
| Deaths | Kuwait                     | All | Age-standardized | All causes | Rate | All infectious syndromes | KP | 2019 | 5.32 | 7.46 | 3.83 |
| Deaths | Cyprus                     | All | Age-standardized | All causes | Rate | All infectious syndromes | KP | 2019 | 5.24 | 7.41 | 3.70 |
| Deaths | Cuba                       | All | Age-standardized | All causes | Rate | All infectious syndromes | KP | 2019 | 5.20 | 7.43 | 3.61 |
| Deaths | Belarus                    | All | Age-standardized | All causes | Rate | All infectious syndromes | KP | 2019 | 5.12 | 8.12 | 3.12 |
| Deaths | Belgium                    | All | Age-standardized | All causes | Rate | All infectious syndromes | KP | 2019 | 5.08 | 6.91 | 3.64 |
| Deaths | Montenegro                 | All | Age-standardized | All causes | Rate | All infectious syndromes | KP | 2019 | 4.97 | 7.65 | 3.00 |
| Deaths | Denmark                    | All | Age-standardized | All causes | Rate | All infectious syndromes | KP | 2019 | 4.94 | 6.91 | 3.46 |
| Deaths | Singapore                  | All | Age-standardized | All causes | Rate | All infectious syndromes | KP | 2019 | 4.93 | 6.03 | 4.05 |
| Deaths | Israel                     | All | Age-standardized | All causes | Rate | All infectious syndromes | KP | 2019 | 4.81 | 6.62 | 3.42 |
| Deaths | Monaco                     | All | Age-standardized | All causes | Rate | All infectious syndromes | KP | 2019 | 4.74 | 6.93 | 3.13 |
| Deaths | Netherlands                | All | Age-standardized | All causes | Rate | All infectious syndromes | KP | 2019 | 4.73 | 6.44 | 3.39 |
| Deaths | Iran (Islamic Republic of) | All | Age-standardized | All causes | Rate | All infectious syndromes | KP | 2019 | 4.66 | 6.91 | 3.08 |
| Deaths | Maldives                   | All | Age-standardized | All causes | Rate | All infectious syndromes | KP | 2019 | 4.65 | 6.90 | 3.05 |
| Deaths | Germany                    | All | Age-standardized | All causes | Rate | All infectious syndromes | KP | 2019 | 4.58 | 6.54 | 3.11 |
| Deaths | Republic of Korea          | All | Age-standardized | All causes | Rate | All infectious syndromes | KP | 2019 | 4.54 | 6.26 | 3.21 |
| Deaths | Tunisia                    | All | Age-standardized | All causes | Rate | All infectious syndromes | KP | 2019 | 4.50 | 6.94 | 2.71 |
| Deaths | Croatia                    | All | Age-standardized | All causes | Rate | All infectious syndromes | KP | 2019 | 4.40 | 6.59 | 2.73 |
| Deaths | Czechia                    | All | Age-standardized | All causes | Rate | All infectious syndromes | KP | 2019 | 4.31 | 6.30 | 2.78 |
| Deaths | Slovenia                   | All | Age-standardized | All causes | Rate | All infectious syndromes | KP | 2019 | 4.30 | 6.72 | 2.70 |
| Deaths | Greece                     | All | Age-standardized | All causes | Rate | All infectious syndromes | KP | 2019 | 4.30 | 6.15 | 2.95 |
| Deaths | Spain                      | All | Age-standardized | All causes | Rate | All infectious syndromes | KP | 2019 | 4.23 | 5.83 | 3.00 |
| Deaths | China                      | All | Age-standardized | All causes | Rate | All infectious syndromes | KP | 2019 | 4.22 | 6.48 | 2.71 |
| Deaths | Andorra                    | All | Age-standardized | All causes | Rate | All infectious syndromes | KP | 2019 | 4.22 | 6.41 | 2.74 |
| Deaths | Ireland                    | All | Age-standardized | All causes | Rate | All infectious syndromes | KP | 2019 | 4.15 | 5.71 | 2.96 |
| Deaths | Estonia                    | All | Age-standardized | All causes | Rate | All infectious syndromes | KP | 2019 | 4.14 | 6.38 | 2.57 |
| Deaths | France                     | All | Age-standardized | All causes | Rate | All infectious syndromes | KP | 2019 | 4.04 | 5.70 | 2.77 |
| Deaths | Luxembourg                 | All | Age-standardized | All causes | Rate | All infectious syndromes | KP | 2019 | 3.84 | 5.48 | 2.57 |
| Deaths | San Marino                 | All | Age-standardized | All causes | Rate | All infectious syndromes | KP | 2019 | 3.79 | 6.27 | 2.09 |
| Deaths | Malta                      | All | Age-standardized | All causes | Rate | All infectious syndromes | KP | 2019 | 3.75 | 5.20 | 2.66 |
| Deaths | Norway                     | All | Age-standardized | All causes | Rate | All infectious syndromes | KP | 2019 | 3.73 | 5.15 | 2.68 |
| Deaths | New Zealand                | All | Age-standardized | All causes | Rate | All infectious syndromes | KP | 2019 | 3.70 | 5.39 | 2.48 |
| Deaths | Canada                     | All | Age-standardized | All causes | Rate | All infectious syndromes | KP | 2019 | 3.67 | 5.19 | 2.52 |
| Deaths | Japan                      | All | Age-standardized | All causes | Rate | All infectious syndromes | KP | 2019 | 3.63 | 4.90 | 2.63 |
| Deaths | Austria                    | All | Age-standardized | All causes | Rate | All infectious syndromes | KP | 2019 | 3.50 | 5.18 | 2.26 |
| Deaths | Australia                  | All | Age-standardized | All causes | Rate | All infectious syndromes | KP | 2019 | 3.44 | 4.91 | 2.31 |
| Deaths | Finland                    | All | Age-standardized | All causes | Rate | All infectious syndromes | KP | 2019 | 3.44 | 5.05 | 2.23 |
| Deaths | Sweden                     | All | Age-standardized | All causes | Rate | All infectious syndromes | KP | 2019 | 3.36 | 4.79 | 2.29 |
| Deaths | Italy                      | All | Age-standardized | All causes | Rate | All infectious syndromes | KP | 2019 | 3.35 | 4.92 | 2.20 |
| Deaths | Switzerland                | All | Age-standardized | All causes | Rate | All infectious syndromes | KP | 2019 | 3.34 | 4.65 | 2.30 |
| Deaths | Bermuda                    | All | Age-standardized | All causes | Rate | All infectious syndromes | KP | 2019 | 3.16 | 4.68 | 2.04 |
| Deaths | Iceland                    | All | Age-standardized | All causes | Rate | All infectious syndromes | KP | 2019 | 2.97 | 4.15 | 2.04 |



**Figure 2 Global and regional deaths associated with and attributable to antimicrobial resistance in *Klebsiella pneumoniae*, by infectious syndrome, 2019**

| measure | location                                         | sex  | age      | cause      | year | metric | infectious syndrome                                       | pathogen | counterfactual             | value  | upper  | lower  |
|---------|--------------------------------------------------|------|----------|------------|------|--------|-----------------------------------------------------------|----------|----------------------------|--------|--------|--------|
| Deaths  | Global                                           | Both | All Ages | All causes | 2019 | Number | Bacterial infections of the skin and subcutaneous systems | KP       | Drug-susceptible infection | 1614   | 5952   | 229    |
| Deaths  | Global                                           | Both | All Ages | All causes | 2019 | Number | Bacterial infections of the skin and subcutaneous systems | KP       | No infection               | 5343   | 19802  | 773    |
| Deaths  | Global                                           | Both | All Ages | All causes | 2019 | Number | Bloodstream infections                                    | KP       | Drug-susceptible infection | 64308  | 104487 | 36134  |
| Deaths  | Global                                           | Both | All Ages | All causes | 2019 | Number | Bloodstream infections                                    | KP       | No infection               | 214528 | 335332 | 128753 |
| Deaths  | Global                                           | Both | All Ages | All causes | 2019 | Number | Endocarditis and other cardiac infections                 | KP       | Drug-susceptible infection | 2271   | 3316   | 1525   |
| Deaths  | Global                                           | Both | All Ages | All causes | 2019 | Number | Endocarditis and other cardiac infections                 | KP       | No infection               | 7777   | 10805  | 5707   |
| Deaths  | Global                                           | Both | All Ages | All causes | 2019 | Number | Infections of bones, joints, and related organs           | KP       | Drug-susceptible infection | 349    | 861    | 93     |
| Deaths  | Global                                           | Both | All Ages | All causes | 2019 | Number | Infections of bones, joints, and related organs           | KP       | No infection               | 1121   | 2664   | 312    |
| Deaths  | Global                                           | Both | All Ages | All causes | 2019 | Number | LRIs and all related infections in the thorax             | KP       | Drug-susceptible infection | 69295  | 93725  | 50546  |
| Deaths  | Global                                           | Both | All Ages | All causes | 2019 | Number | LRIs and all related infections in the thorax             | KP       | No infection               | 231776 | 288677 | 184551 |
| Deaths  | Global                                           | Both | All Ages | All causes | 2019 | Number | Meningitis and other bacterial CNS infections             | KP       | Drug-susceptible infection | 8974   | 13636  | 5847   |
| Deaths  | Global                                           | Both | All Ages | All causes | 2019 | Number | Meningitis and other bacterial CNS infections             | KP       | No infection               | 30318  | 42755  | 21378  |
| Deaths  | Global                                           | Both | All Ages | All causes | 2019 | Number | Peritoneal and intra-abdominal infections                 | KP       | Drug-susceptible infection | 37447  | 57239  | 23574  |
| Deaths  | Global                                           | Both | All Ages | All causes | 2019 | Number | Peritoneal and intra-abdominal infections                 | KP       | No infection               | 123158 | 182226 | 80452  |
| Deaths  | Global                                           | Both | All Ages | All causes | 2019 | Number | Urinary tract infections and pyelonephritis               | KP       | Drug-susceptible infection | 8334   | 12475  | 5477   |
| Deaths  | Global                                           | Both | All Ages | All causes | 2019 | Number | Urinary tract infections and pyelonephritis               | KP       | No infection               | 27682  | 40307  | 19015  |
| Deaths  | Southeast Asia, East Asia, and Oceania           | Both | All Ages | All causes | 2019 | Number | Bacterial infections of the skin and subcutaneous systems | KP       | Drug-susceptible infection | 390    | 1380   | 53     |
| Deaths  | Southeast Asia, East Asia, and Oceania           | Both | All Ages | All causes | 2019 | Number | Bacterial infections of the skin and subcutaneous systems | KP       | No infection               | 1353   | 4801   | 184    |
| Deaths  | Southeast Asia, East Asia, and Oceania           | Both | All Ages | All causes | 2019 | Number | Bloodstream infections                                    | KP       | Drug-susceptible infection | 10968  | 18921  | 5578   |
| Deaths  | Southeast Asia, East Asia, and Oceania           | Both | All Ages | All causes | 2019 | Number | Bloodstream infections                                    | KP       | No infection               | 38012  | 62435  | 21412  |
| Deaths  | Southeast Asia, East Asia, and Oceania           | Both | All Ages | All causes | 2019 | Number | Endocarditis and other cardiac infections                 | KP       | Drug-susceptible infection | 376    | 601    | 233    |
| Deaths  | Southeast Asia, East Asia, and Oceania           | Both | All Ages | All causes | 2019 | Number | Endocarditis and other cardiac infections                 | KP       | No infection               | 1292   | 1943   | 871    |
| Deaths  | Southeast Asia, East Asia, and Oceania           | Both | All Ages | All causes | 2019 | Number | Infections of bones, joints, and related organs           | KP       | Drug-susceptible infection | 59     | 149    | 16     |
| Deaths  | Southeast Asia, East Asia, and Oceania           | Both | All Ages | All causes | 2019 | Number | Infections of bones, joints, and related organs           | KP       | No infection               | 204    | 484    | 60     |
| Deaths  | Southeast Asia, East Asia, and Oceania           | Both | All Ages | All causes | 2019 | Number | LRIs and all related infections in the thorax             | KP       | Drug-susceptible infection | 8237   | 12035  | 5386   |
| Deaths  | Southeast Asia, East Asia, and Oceania           | Both | All Ages | All causes | 2019 | Number | LRIs and all related infections in the thorax             | KP       | No infection               | 28066  | 36996  | 20873  |
| Deaths  | Southeast Asia, East Asia, and Oceania           | Both | All Ages | All causes | 2019 | Number | Meningitis and other bacterial CNS infections             | KP       | Drug-susceptible infection | 621    | 1070   | 376    |
| Deaths  | Southeast Asia, East Asia, and Oceania           | Both | All Ages | All causes | 2019 | Number | Meningitis and other bacterial CNS infections             | KP       | No infection               | 2126   | 3497   | 1411   |
| Deaths  | Southeast Asia, East Asia, and Oceania           | Both | All Ages | All causes | 2019 | Number | Peritoneal and intra-abdominal infections                 | KP       | Drug-susceptible infection | 7687   | 12676  | 4376   |
| Deaths  | Southeast Asia, East Asia, and Oceania           | Both | All Ages | All causes | 2019 | Number | Peritoneal and intra-abdominal infections                 | KP       | No infection               | 26498  | 40532  | 16635  |
| Deaths  | Southeast Asia, East Asia, and Oceania           | Both | All Ages | All causes | 2019 | Number | Urinary tract infections and pyelonephritis               | KP       | Drug-susceptible infection | 1756   | 3187   | 879    |
| Deaths  | Southeast Asia, East Asia, and Oceania           | Both | All Ages | All causes | 2019 | Number | Urinary tract infections and pyelonephritis               | KP       | No infection               | 6118   | 10565  | 3246   |
| Deaths  | Central Europe, Eastern Europe, and Central Asia | Both | All Ages | All causes | 2019 | Number | Bacterial infections of the skin and subcutaneous systems | KP       | Drug-susceptible infection | 133    | 474    | 20     |
| Deaths  | Central Europe, Eastern Europe, and Central Asia | Both | All Ages | All causes | 2019 | Number | Bacterial infections of the skin and subcutaneous systems | KP       | No infection               | 424    | 1493   | 61     |
| Deaths  | Central Europe, Eastern Europe, and Central Asia | Both | All Ages | All causes | 2019 | Number | Bloodstream infections                                    | KP       | Drug-susceptible infection | 4890   | 8473   | 2541   |
| Deaths  | Central Europe, Eastern Europe, and Central Asia | Both | All Ages | All causes | 2019 | Number | Bloodstream infections                                    | KP       | No infection               | 15789  | 26737  | 8492   |
| Deaths  | Central Europe, Eastern Europe, and Central Asia | Both | All Ages | All causes | 2019 | Number | Endocarditis and other cardiac infections                 | KP       | Drug-susceptible infection | 329    | 558    | 185    |
| Deaths  | Central Europe, Eastern Europe, and Central Asia | Both | All Ages | All causes | 2019 | Number | Endocarditis and other cardiac infections                 | KP       | No infection               | 1086   | 1795   | 627    |
| Deaths  | Central Europe, Eastern Europe, and Central Asia | Both | All Ages | All causes | 2019 | Number | Infections of bones, joints, and related organs           | KP       | Drug-susceptible infection | 18     | 44     | 5      |
| Deaths  | Central Europe, Eastern Europe, and Central Asia | Both | All Ages | All causes | 2019 | Number | Infections of bones, joints, and related organs           | KP       | No infection               | 58     | 139    | 17     |
| Deaths  | Central Europe, Eastern Europe, and Central Asia | Both | All Ages | All causes | 2019 | Number | LRIs and all related infections in the thorax             | KP       | Drug-susceptible infection | 2580   | 3643   | 1804   |
| Deaths  | Central Europe, Eastern Europe, and Central Asia | Both | All Ages | All causes | 2019 | Number | LRIs and all related infections in the thorax             | KP       | No infection               | 8403   | 11258  | 6382   |
| Deaths  | Central Europe, Eastern Europe, and Central Asia | Both | All Ages | All causes | 2019 | Number | Meningitis and other bacterial CNS infections             | KP       | Drug-susceptible infection | 134    | 239    | 82     |
| Deaths  | Central Europe, Eastern Europe, and Central Asia | Both | All Ages | All causes | 2019 | Number | Meningitis and other bacterial CNS infections             | KP       | No infection               | 436    | 774    | 279    |
| Deaths  | Central Europe, Eastern Europe, and Central Asia | Both | All Ages | All causes | 2019 | Number | Peritoneal and intra-abdominal infections                 | KP       | Drug-susceptible infection | 3534   | 5371   | 2231   |
| Deaths  | Central Europe, Eastern Europe, and Central Asia | Both | All Ages | All causes | 2019 | Number | Peritoneal and intra-abdominal infections                 | KP       | No infection               | 11457  | 16709  | 7413   |
| Deaths  | Central Europe, Eastern Europe, and Central Asia | Both | All Ages | All causes | 2019 | Number | Urinary tract infections and pyelonephritis               | KP       | Drug-susceptible infection | 1025   | 1597   | 639    |
| Deaths  | Central Europe, Eastern Europe, and Central Asia | Both | All Ages | All causes | 2019 | Number | Urinary tract infections and pyelonephritis               | KP       | No infection               | 3285   | 4988   | 2137   |
| Deaths  | High-income                                      | Both | All Ages | All causes | 2019 | Number | Bacterial infections of the skin and subcutaneous systems | KP       | Drug-susceptible infection | 154    | 508    | 24     |
| Deaths  | High-income                                      | Both | All Ages | All causes | 2019 | Number | Bacterial infections of the skin and subcutaneous systems | KP       | No infection               | 620    | 2042   | 98     |
| Deaths  | High-income                                      | Both | All Ages | All causes | 2019 | Number | Bloodstream infections                                    | KP       | Drug-susceptible infection | 3960   | 6863   | 2042   |
| Deaths  | High-income                                      | Both | All Ages | All causes | 2019 | Number | Bloodstream infections                                    | KP       | No infection               | 15879  | 26778  | 8609   |
| Deaths  | High-income                                      | Both | All Ages | All causes | 2019 | Number | Endocarditis and other cardiac infections                 | KP       | Drug-susceptible infection | 481    | 706    | 279    |
| Deaths  | High-income                                      | Both | All Ages | All causes | 2019 | Number | Endocarditis and other cardiac infections                 | KP       | No infection               | 1952   | 2644   | 1255   |
| Deaths  | High-income                                      | Both | All Ages | All causes | 2019 | Number | Infections of bones, joints, and related organs           | KP       | Drug-susceptible infection | 17     | 39     | 5      |
| Deaths  | High-income                                      | Both | All Ages | All causes | 2019 | Number | Infections of bones, joints, and related organs           | KP       | No infection               | 67     | 152    | 21     |

|        |                              |      |          |            |      |        |                                                           |    |                            |       |       |       |
|--------|------------------------------|------|----------|------------|------|--------|-----------------------------------------------------------|----|----------------------------|-------|-------|-------|
| Deaths | High-income                  | Both | All Ages | All causes | 2019 | Number | LRIs and all related infections in the thorax             | KP | Drug-susceptible infection | 3209  | 4409  | 2314  |
| Deaths | High-income                  | Both | All Ages | All causes | 2019 | Number | LRIs and all related infections in the thorax             | KP | No infection               | 12914 | 15845 | 10529 |
| Deaths | High-income                  | Both | All Ages | All causes | 2019 | Number | Meningitis and other bacterial CNS infections             | KP | Drug-susceptible infection | 76    | 136   | 46    |
| Deaths | High-income                  | Both | All Ages | All causes | 2019 | Number | Meningitis and other bacterial CNS infections             | KP | No infection               | 301   | 533   | 198   |
| Deaths | High-income                  | Both | All Ages | All causes | 2019 | Number | Peritoneal and intra-abdominal infections                 | KP | Drug-susceptible infection | 3230  | 4908  | 1933  |
| Deaths | High-income                  | Both | All Ages | All causes | 2019 | Number | Peritoneal and intra-abdominal infections                 | KP | No infection               | 13047 | 19071 | 8642  |
| Deaths | High-income                  | Both | All Ages | All causes | 2019 | Number | Urinary tract infections and pyelonephritis               | KP | Drug-susceptible infection | 1296  | 1837  | 885   |
| Deaths | High-income                  | Both | All Ages | All causes | 2019 | Number | Urinary tract infections and pyelonephritis               | KP | No infection               | 5279  | 7032  | 3993  |
| Deaths | Latin America and Caribbean  | Both | All Ages | All causes | 2019 | Number | Bacterial infections of the skin and subcutaneous systems | KP | Drug-susceptible infection | 139   | 475   | 22    |
| Deaths | Latin America and Caribbean  | Both | All Ages | All causes | 2019 | Number | Bacterial infections of the skin and subcutaneous systems | KP | No infection               | 494   | 1645  | 81    |
| Deaths | Latin America and Caribbean  | Both | All Ages | All causes | 2019 | Number | Bloodstream infections                                    | KP | Drug-susceptible infection | 4479  | 7457  | 2411  |
| Deaths | Latin America and Caribbean  | Both | All Ages | All causes | 2019 | Number | Bloodstream infections                                    | KP | No infection               | 16009 | 25541 | 9217  |
| Deaths | Latin America and Caribbean  | Both | All Ages | All causes | 2019 | Number | Endocarditis and other cardiac infections                 | KP | Drug-susceptible infection | 175   | 242   | 122   |
| Deaths | Latin America and Caribbean  | Both | All Ages | All causes | 2019 | Number | Endocarditis and other cardiac infections                 | KP | No infection               | 612   | 785   | 468   |
| Deaths | Latin America and Caribbean  | Both | All Ages | All causes | 2019 | Number | Infections of bones, joints, and related organs           | KP | Drug-susceptible infection | 20    | 49    | 5     |
| Deaths | Latin America and Caribbean  | Both | All Ages | All causes | 2019 | Number | Infections of bones, joints, and related organs           | KP | No infection               | 70    | 165   | 19    |
| Deaths | Latin America and Caribbean  | Both | All Ages | All causes | 2019 | Number | LRIs and all related infections in the thorax             | KP | Drug-susceptible infection | 4316  | 5808  | 3071  |
| Deaths | Latin America and Caribbean  | Both | All Ages | All causes | 2019 | Number | LRIs and all related infections in the thorax             | KP | No infection               | 15351 | 19522 | 11992 |
| Deaths | Latin America and Caribbean  | Both | All Ages | All causes | 2019 | Number | Meningitis and other bacterial CNS infections             | KP | Drug-susceptible infection | 186   | 298   | 116   |
| Deaths | Latin America and Caribbean  | Both | All Ages | All causes | 2019 | Number | Meningitis and other bacterial CNS infections             | KP | No infection               | 673   | 1064  | 451   |
| Deaths | Latin America and Caribbean  | Both | All Ages | All causes | 2019 | Number | Peritoneal and intra-abdominal infections                 | KP | Drug-susceptible infection | 3205  | 4828  | 2002  |
| Deaths | Latin America and Caribbean  | Both | All Ages | All causes | 2019 | Number | Peritoneal and intra-abdominal infections                 | KP | No infection               | 11477 | 16541 | 7674  |
| Deaths | Latin America and Caribbean  | Both | All Ages | All causes | 2019 | Number | Urinary tract infections and pyelonephritis               | KP | Drug-susceptible infection | 992   | 1395  | 679   |
| Deaths | Latin America and Caribbean  | Both | All Ages | All causes | 2019 | Number | Urinary tract infections and pyelonephritis               | KP | No infection               | 3481  | 4638  | 2612  |
| Deaths | North Africa and Middle East | Both | All Ages | All causes | 2019 | Number | Bacterial infections of the skin and subcutaneous systems | KP | Drug-susceptible infection | 90    | 340   | 11    |
| Deaths | North Africa and Middle East | Both | All Ages | All causes | 2019 | Number | Bacterial infections of the skin and subcutaneous systems | KP | No infection               | 295   | 1132  | 35    |
| Deaths | North Africa and Middle East | Both | All Ages | All causes | 2019 | Number | Bloodstream infections                                    | KP | Drug-susceptible infection | 4016  | 6768  | 2150  |
| Deaths | North Africa and Middle East | Both | All Ages | All causes | 2019 | Number | Bloodstream infections                                    | KP | No infection               | 13387 | 21301 | 7627  |
| Deaths | North Africa and Middle East | Both | All Ages | All causes | 2019 | Number | Endocarditis and other cardiac infections                 | KP | Drug-susceptible infection | 151   | 228   | 98    |
| Deaths | North Africa and Middle East | Both | All Ages | All causes | 2019 | Number | Endocarditis and other cardiac infections                 | KP | No infection               | 495   | 708   | 343   |
| Deaths | North Africa and Middle East | Both | All Ages | All causes | 2019 | Number | Infections of bones, joints, and related organs           | KP | Drug-susceptible infection | 30    | 76    | 7     |
| Deaths | North Africa and Middle East | Both | All Ages | All causes | 2019 | Number | Infections of bones, joints, and related organs           | KP | No infection               | 101   | 244   | 25    |
| Deaths | North Africa and Middle East | Both | All Ages | All causes | 2019 | Number | LRIs and all related infections in the thorax             | KP | Drug-susceptible infection | 3525  | 4927  | 2364  |
| Deaths | North Africa and Middle East | Both | All Ages | All causes | 2019 | Number | LRIs and all related infections in the thorax             | KP | No infection               | 11900 | 15420 | 8994  |
| Deaths | North Africa and Middle East | Both | All Ages | All causes | 2019 | Number | Meningitis and other bacterial CNS infections             | KP | Drug-susceptible infection | 361   | 675   | 194   |
| Deaths | North Africa and Middle East | Both | All Ages | All causes | 2019 | Number | Meningitis and other bacterial CNS infections             | KP | No infection               | 1228  | 2242  | 710   |
| Deaths | North Africa and Middle East | Both | All Ages | All causes | 2019 | Number | Peritoneal and intra-abdominal infections                 | KP | Drug-susceptible infection | 2765  | 4316  | 1631  |
| Deaths | North Africa and Middle East | Both | All Ages | All causes | 2019 | Number | Peritoneal and intra-abdominal infections                 | KP | No infection               | 8533  | 12979 | 5218  |
| Deaths | North Africa and Middle East | Both | All Ages | All causes | 2019 | Number | Urinary tract infections and pyelonephritis               | KP | Drug-susceptible infection | 379   | 686   | 184   |
| Deaths | North Africa and Middle East | Both | All Ages | All causes | 2019 | Number | Urinary tract infections and pyelonephritis               | KP | No infection               | 1223  | 2107  | 611   |
| Deaths | South Asia                   | Both | All Ages | All causes | 2019 | Number | Bacterial infections of the skin and subcutaneous systems | KP | Drug-susceptible infection | 506   | 2026  | 53    |
| Deaths | South Asia                   | Both | All Ages | All causes | 2019 | Number | Bacterial infections of the skin and subcutaneous systems | KP | No infection               | 1413  | 5552  | 148   |
| Deaths | South Asia                   | Both | All Ages | All causes | 2019 | Number | Bloodstream infections                                    | KP | Drug-susceptible infection | 20796 | 33393 | 11683 |
| Deaths | South Asia                   | Both | All Ages | All causes | 2019 | Number | Bloodstream infections                                    | KP | No infection               | 59573 | 95764 | 34167 |
| Deaths | South Asia                   | Both | All Ages | All causes | 2019 | Number | Endocarditis and other cardiac infections                 | KP | Drug-susceptible infection | 544   | 775   | 372   |
| Deaths | South Asia                   | Both | All Ages | All causes | 2019 | Number | Endocarditis and other cardiac infections                 | KP | No infection               | 1539  | 2164  | 1088  |
| Deaths | South Asia                   | Both | All Ages | All causes | 2019 | Number | Infections of bones, joints, and related organs           | KP | Drug-susceptible infection | 148   | 354   | 40    |
| Deaths | South Asia                   | Both | All Ages | All causes | 2019 | Number | Infections of bones, joints, and related organs           | KP | No infection               | 409   | 968   | 108   |
| Deaths | South Asia                   | Both | All Ages | All causes | 2019 | Number | LRIs and all related infections in the thorax             | KP | Drug-susceptible infection | 22914 | 30145 | 17042 |
| Deaths | South Asia                   | Both | All Ages | All causes | 2019 | Number | LRIs and all related infections in the thorax             | KP | No infection               | 64980 | 84021 | 49662 |
| Deaths | South Asia                   | Both | All Ages | All causes | 2019 | Number | Meningitis and other bacterial CNS infections             | KP | Drug-susceptible infection | 2520  | 3666  | 1746  |
| Deaths | South Asia                   | Both | All Ages | All causes | 2019 | Number | Meningitis and other bacterial CNS infections             | KP | No infection               | 7165  | 10283 | 5130  |
| Deaths | South Asia                   | Both | All Ages | All causes | 2019 | Number | Peritoneal and intra-abdominal infections                 | KP | Drug-susceptible infection | 11797 | 18456 | 7262  |
| Deaths | South Asia                   | Both | All Ages | All causes | 2019 | Number | Peritoneal and intra-abdominal infections                 | KP | No infection               | 33011 | 50014 | 20782 |
| Deaths | South Asia                   | Both | All Ages | All causes | 2019 | Number | Urinary tract infections and pyelonephritis               | KP | Drug-susceptible infection | 2568  | 3604  | 1777  |
| Deaths | South Asia                   | Both | All Ages | All causes | 2019 | Number | Urinary tract infections and pyelonephritis               | KP | No infection               | 7129  | 9867  | 5106  |
| Deaths | Sub-Saharan Africa           | Both | All Ages | All causes | 2019 | Number | Bacterial infections of the skin and subcutaneous systems | KP | Drug-susceptible infection | 202   | 835   | 19    |
| Deaths | Sub-Saharan Africa           | Both | All Ages | All causes | 2019 | Number | Bacterial infections of the skin and subcutaneous systems | KP | No infection               | 745   | 3010  | 70    |
| Deaths | Sub-Saharan Africa           | Both | All Ages | All causes | 2019 | Number | Bloodstream infections                                    | KP | Drug-susceptible infection | 15192 | 23377 | 9088  |
| Deaths | Sub-Saharan Africa           | Both | All Ages | All causes | 2019 | Number | Bloodstream infections                                    | KP | No infection               | 55863 | 80164 | 37077 |

|        |                    |      |          |            |      |        |                                                 |    |                            |       |        |       |
|--------|--------------------|------|----------|------------|------|--------|-------------------------------------------------|----|----------------------------|-------|--------|-------|
| Deaths | Sub-Saharan Africa | Both | All Ages | All causes | 2019 | Number | Endocarditis and other cardiac infections       | KP | Drug-susceptible infection | 215   | 318    | 136   |
| Deaths | Sub-Saharan Africa | Both | All Ages | All causes | 2019 | Number | Endocarditis and other cardiac infections       | KP | No infection               | 800   | 1079   | 595   |
| Deaths | Sub-Saharan Africa | Both | All Ages | All causes | 2019 | Number | Infections of bones, joints, and related organs | KP | Drug-susceptible infection | 57    | 148    | 15    |
| Deaths | Sub-Saharan Africa | Both | All Ages | All causes | 2019 | Number | Infections of bones, joints, and related organs | KP | No infection               | 211   | 488    | 57    |
| Deaths | Sub-Saharan Africa | Both | All Ages | All causes | 2019 | Number | LRIs and all related infections in the thorax   | KP | Drug-susceptible infection | 24504 | 34021  | 16556 |
| Deaths | Sub-Saharan Africa | Both | All Ages | All causes | 2019 | Number | LRIs and all related infections in the thorax   | KP | No infection               | 90135 | 112430 | 71663 |
| Deaths | Sub-Saharan Africa | Both | All Ages | All causes | 2019 | Number | Meningitis and other bacterial CNS infections   | KP | Drug-susceptible infection | 5074  | 8100   | 2991  |
| Deaths | Sub-Saharan Africa | Both | All Ages | All causes | 2019 | Number | Meningitis and other bacterial CNS infections   | KP | No infection               | 18381 | 26567  | 12533 |
| Deaths | Sub-Saharan Africa | Both | All Ages | All causes | 2019 | Number | Peritoneal and intra-abdominal infections       | KP | Drug-susceptible infection | 5227  | 8624   | 2864  |
| Deaths | Sub-Saharan Africa | Both | All Ages | All causes | 2019 | Number | Peritoneal and intra-abdominal infections       | KP | No infection               | 19135 | 29341  | 12214 |
| Deaths | Sub-Saharan Africa | Both | All Ages | All causes | 2019 | Number | Urinary tract infections and pyelonephritis     | KP | Drug-susceptible infection | 318   | 504    | 182   |
| Deaths | Sub-Saharan Africa | Both | All Ages | All causes | 2019 | Number | Urinary tract infections and pyelonephritis     | KP | No infection               | 1171  | 1687   | 703   |

**Figure 3 Global and regional mortality rates in all ages associated with and attributable to antimicrobial resistance in *Klebsiella pneumoniae*, by infectious syndrome, 2019**

| measure | location                                         | sex  | age      | cause      | year | metric | infectious syndrome                                       | pathogen | counterfactual             | value<br>(per 100,000) | upper<br>(per 100,000) | lower<br>(per 100,000) |
|---------|--------------------------------------------------|------|----------|------------|------|--------|-----------------------------------------------------------|----------|----------------------------|------------------------|------------------------|------------------------|
| Deaths  | Global                                           | Both | All Ages | All causes | 2019 | Rate   | Bacterial infections of the skin and subcutaneous systems | KP       | Drug-susceptible infection | 0.021                  | 0.077                  | 0.003                  |
| Deaths  | Global                                           | Both | All Ages | All causes | 2019 | Rate   | Bacterial infections of the skin and subcutaneous systems | KP       | No infection               | 0.069                  | 0.256                  | 0.010                  |
| Deaths  | Global                                           | Both | All Ages | All causes | 2019 | Rate   | Bloodstream infections                                    | KP       | Drug-susceptible infection | 0.831                  | 1.350                  | 0.467                  |
| Deaths  | Global                                           | Both | All Ages | All causes | 2019 | Rate   | Bloodstream infections                                    | KP       | No infection               | 2.770                  | 4.330                  | 1.660                  |
| Deaths  | Global                                           | Both | All Ages | All causes | 2019 | Rate   | Endocarditis and other cardiac infections                 | KP       | Drug-susceptible infection | 0.029                  | 0.043                  | 0.020                  |
| Deaths  | Global                                           | Both | All Ages | All causes | 2019 | Rate   | Endocarditis and other cardiac infections                 | KP       | No infection               | 0.101                  | 0.140                  | 0.074                  |
| Deaths  | Global                                           | Both | All Ages | All causes | 2019 | Rate   | Infections of bones, joints, and related organs           | KP       | Drug-susceptible infection | 0.005                  | 0.011                  | 0.001                  |
| Deaths  | Global                                           | Both | All Ages | All causes | 2019 | Rate   | Infections of bones, joints, and related organs           | KP       | No infection               | 0.015                  | 0.034                  | 0.004                  |
| Deaths  | Global                                           | Both | All Ages | All causes | 2019 | Rate   | LRIs and all related infections in the thorax             | KP       | Drug-susceptible infection | 0.896                  | 1.210                  | 0.653                  |
| Deaths  | Global                                           | Both | All Ages | All causes | 2019 | Rate   | LRIs and all related infections in the thorax             | KP       | No infection               | 3.000                  | 3.730                  | 2.390                  |
| Deaths  | Global                                           | Both | All Ages | All causes | 2019 | Rate   | Meningitis and other bacterial CNS infections             | KP       | Drug-susceptible infection | 0.116                  | 0.176                  | 0.076                  |
| Deaths  | Global                                           | Both | All Ages | All causes | 2019 | Rate   | Meningitis and other bacterial CNS infections             | KP       | No infection               | 0.392                  | 0.553                  | 0.276                  |
| Deaths  | Global                                           | Both | All Ages | All causes | 2019 | Rate   | Peritoneal and intra-abdominal infections                 | KP       | Drug-susceptible infection | 0.484                  | 0.740                  | 0.305                  |
| Deaths  | Global                                           | Both | All Ages | All causes | 2019 | Rate   | Peritoneal and intra-abdominal infections                 | KP       | No infection               | 1.590                  | 2.360                  | 1.040                  |
| Deaths  | Global                                           | Both | All Ages | All causes | 2019 | Rate   | Urinary tract infections and pyelonephritis               | KP       | Drug-susceptible infection | 0.108                  | 0.161                  | 0.071                  |
| Deaths  | Global                                           | Both | All Ages | All causes | 2019 | Rate   | Urinary tract infections and pyelonephritis               | KP       | No infection               | 0.358                  | 0.521                  | 0.246                  |
| Deaths  | Southeast Asia, East Asia, and Oceania           | Both | All Ages | All causes | 2019 | Rate   | Bacterial infections of the skin and subcutaneous systems | KP       | Drug-susceptible infection | 0.018                  | 0.064                  | 0.002                  |
| Deaths  | Southeast Asia, East Asia, and Oceania           | Both | All Ages | All causes | 2019 | Rate   | Bacterial infections of the skin and subcutaneous systems | KP       | No infection               | 0.063                  | 0.222                  | 0.009                  |
| Deaths  | Southeast Asia, East Asia, and Oceania           | Both | All Ages | All causes | 2019 | Rate   | Bloodstream infections                                    | KP       | Drug-susceptible infection | 0.508                  | 0.876                  | 0.258                  |
| Deaths  | Southeast Asia, East Asia, and Oceania           | Both | All Ages | All causes | 2019 | Rate   | Bloodstream infections                                    | KP       | No infection               | 1.760                  | 2.890                  | 0.992                  |
| Deaths  | Southeast Asia, East Asia, and Oceania           | Both | All Ages | All causes | 2019 | Rate   | Endocarditis and other cardiac infections                 | KP       | Drug-susceptible infection | 0.017                  | 0.028                  | 0.011                  |
| Deaths  | Southeast Asia, East Asia, and Oceania           | Both | All Ages | All causes | 2019 | Rate   | Endocarditis and other cardiac infections                 | KP       | No infection               | 0.060                  | 0.090                  | 0.040                  |
| Deaths  | Southeast Asia, East Asia, and Oceania           | Both | All Ages | All causes | 2019 | Rate   | Infections of bones, joints, and related organs           | KP       | Drug-susceptible infection | 0.003                  | 0.007                  | 0.001                  |
| Deaths  | Southeast Asia, East Asia, and Oceania           | Both | All Ages | All causes | 2019 | Rate   | Infections of bones, joints, and related organs           | KP       | No infection               | 0.009                  | 0.022                  | 0.003                  |
| Deaths  | Southeast Asia, East Asia, and Oceania           | Both | All Ages | All causes | 2019 | Rate   | LRIs and all related infections in the thorax             | KP       | Drug-susceptible infection | 0.381                  | 0.557                  | 0.249                  |
| Deaths  | Southeast Asia, East Asia, and Oceania           | Both | All Ages | All causes | 2019 | Rate   | LRIs and all related infections in the thorax             | KP       | No infection               | 1.300                  | 1.710                  | 0.967                  |
| Deaths  | Southeast Asia, East Asia, and Oceania           | Both | All Ages | All causes | 2019 | Rate   | Meningitis and other bacterial CNS infections             | KP       | Drug-susceptible infection | 0.029                  | 0.050                  | 0.017                  |
| Deaths  | Southeast Asia, East Asia, and Oceania           | Both | All Ages | All causes | 2019 | Rate   | Meningitis and other bacterial CNS infections             | KP       | No infection               | 0.098                  | 0.162                  | 0.065                  |
| Deaths  | Southeast Asia, East Asia, and Oceania           | Both | All Ages | All causes | 2019 | Rate   | Peritoneal and intra-abdominal infections                 | KP       | Drug-susceptible infection | 0.356                  | 0.587                  | 0.203                  |
| Deaths  | Southeast Asia, East Asia, and Oceania           | Both | All Ages | All causes | 2019 | Rate   | Peritoneal and intra-abdominal infections                 | KP       | No infection               | 1.230                  | 1.880                  | 0.770                  |
| Deaths  | Southeast Asia, East Asia, and Oceania           | Both | All Ages | All causes | 2019 | Rate   | Urinary tract infections and pyelonephritis               | KP       | Drug-susceptible infection | 0.081                  | 0.148                  | 0.041                  |
| Deaths  | Southeast Asia, East Asia, and Oceania           | Both | All Ages | All causes | 2019 | Rate   | Urinary tract infections and pyelonephritis               | KP       | No infection               | 0.283                  | 0.489                  | 0.150                  |
| Deaths  | Central Europe, Eastern Europe, and Central Asia | Both | All Ages | All causes | 2019 | Rate   | Bacterial infections of the skin and subcutaneous systems | KP       | Drug-susceptible infection | 0.032                  | 0.114                  | 0.005                  |
| Deaths  | Central Europe, Eastern Europe, and Central Asia | Both | All Ages | All causes | 2019 | Rate   | Bacterial infections of the skin and subcutaneous systems | KP       | No infection               | 0.102                  | 0.357                  | 0.015                  |
| Deaths  | Central Europe, Eastern Europe, and Central Asia | Both | All Ages | All causes | 2019 | Rate   | Bloodstream infections                                    | KP       | Drug-susceptible infection | 1.170                  | 2.030                  | 0.608                  |
| Deaths  | Central Europe, Eastern Europe, and Central Asia | Both | All Ages | All causes | 2019 | Rate   | Bloodstream infections                                    | KP       | No infection               | 3.780                  | 6.400                  | 2.030                  |
| Deaths  | Central Europe, Eastern Europe, and Central Asia | Both | All Ages | All causes | 2019 | Rate   | Endocarditis and other cardiac infections                 | KP       | Drug-susceptible infection | 0.079                  | 0.134                  | 0.044                  |
| Deaths  | Central Europe, Eastern Europe, and Central Asia | Both | All Ages | All causes | 2019 | Rate   | Endocarditis and other cardiac infections                 | KP       | No infection               | 0.260                  | 0.430                  | 0.150                  |
| Deaths  | Central Europe, Eastern Europe, and Central Asia | Both | All Ages | All causes | 2019 | Rate   | Infections of bones, joints, and related organs           | KP       | Drug-susceptible infection | 0.004                  | 0.010                  | 0.001                  |
| Deaths  | Central Europe, Eastern Europe, and Central Asia | Both | All Ages | All causes | 2019 | Rate   | Infections of bones, joints, and related organs           | KP       | No infection               | 0.014                  | 0.033                  | 0.004                  |
| Deaths  | Central Europe, Eastern Europe, and Central Asia | Both | All Ages | All causes | 2019 | Rate   | LRIs and all related infections in the thorax             | KP       | Drug-susceptible infection | 0.618                  | 0.872                  | 0.432                  |
| Deaths  | Central Europe, Eastern Europe, and Central Asia | Both | All Ages | All causes | 2019 | Rate   | LRIs and all related infections in the thorax             | KP       | No infection               | 2.010                  | 2.700                  | 1.530                  |
| Deaths  | Central Europe, Eastern Europe, and Central Asia | Both | All Ages | All causes | 2019 | Rate   | Meningitis and other bacterial CNS infections             | KP       | Drug-susceptible infection | 0.032                  | 0.057                  | 0.020                  |
| Deaths  | Central Europe, Eastern Europe, and Central Asia | Both | All Ages | All causes | 2019 | Rate   | Meningitis and other bacterial CNS infections             | KP       | No infection               | 0.104                  | 0.185                  | 0.067                  |
| Deaths  | Central Europe, Eastern Europe, and Central Asia | Both | All Ages | All causes | 2019 | Rate   | Peritoneal and intra-abdominal infections                 | KP       | Drug-susceptible infection | 0.846                  | 1.290                  | 0.534                  |
| Deaths  | Central Europe, Eastern Europe, and Central Asia | Both | All Ages | All causes | 2019 | Rate   | Peritoneal and intra-abdominal infections                 | KP       | No infection               | 2.740                  | 4.000                  | 1.770                  |
| Deaths  | Central Europe, Eastern Europe, and Central Asia | Both | All Ages | All causes | 2019 | Rate   | Urinary tract infections and pyelonephritis               | KP       | Drug-susceptible infection | 0.245                  | 0.382                  | 0.153                  |
| Deaths  | Central Europe, Eastern Europe, and Central Asia | Both | All Ages | All causes | 2019 | Rate   | Urinary tract infections and pyelonephritis               | KP       | No infection               | 0.786                  | 1.190                  | 0.512                  |
| Deaths  | High-income                                      | Both | All Ages | All causes | 2019 | Rate   | Bacterial infections of the skin and subcutaneous systems | KP       | Drug-susceptible infection | 0.014                  | 0.047                  | 0.002                  |
| Deaths  | High-income                                      | Both | All Ages | All causes | 2019 | Rate   | Bacterial infections of the skin and subcutaneous systems | KP       | No infection               | 0.057                  | 0.188                  | 0.009                  |

|        |                              |      |          |            |      |      |                                                           |    |                            |       |       |       |
|--------|------------------------------|------|----------|------------|------|------|-----------------------------------------------------------|----|----------------------------|-------|-------|-------|
| Deaths | High-income                  | Both | All Ages | All causes | 2019 | Rate | Bloodstream infections                                    | KP | Drug-susceptible infection | 0.365 | 0.633 | 0.188 |
| Deaths | High-income                  | Both | All Ages | All causes | 2019 | Rate | Bloodstream infections                                    | KP | No infection               | 1.460 | 2.470 | 0.794 |
| Deaths | High-income                  | Both | All Ages | All causes | 2019 | Rate | Endocarditis and other cardiac infections                 | KP | Drug-susceptible infection | 0.044 | 0.065 | 0.026 |
| Deaths | High-income                  | Both | All Ages | All causes | 2019 | Rate | Endocarditis and other cardiac infections                 | KP | No infection               | 0.180 | 0.244 | 0.116 |
| Deaths | High-income                  | Both | All Ages | All causes | 2019 | Rate | Infections of bones, joints, and related organs           | KP | Drug-susceptible infection | 0.002 | 0.004 | 0.000 |
| Deaths | High-income                  | Both | All Ages | All causes | 2019 | Rate | Infections of bones, joints, and related organs           | KP | No infection               | 0.006 | 0.014 | 0.002 |
| Deaths | High-income                  | Both | All Ages | All causes | 2019 | Rate | LRIs and all related infections in the thorax             | KP | Drug-susceptible infection | 0.296 | 0.407 | 0.213 |
| Deaths | High-income                  | Both | All Ages | All causes | 2019 | Rate | LRIs and all related infections in the thorax             | KP | No infection               | 1.190 | 1.460 | 0.971 |
| Deaths | High-income                  | Both | All Ages | All causes | 2019 | Rate | Meningitis and other bacterial CNS infections             | KP | Drug-susceptible infection | 0.007 | 0.013 | 0.004 |
| Deaths | High-income                  | Both | All Ages | All causes | 2019 | Rate | Meningitis and other bacterial CNS infections             | KP | No infection               | 0.028 | 0.049 | 0.018 |
| Deaths | High-income                  | Both | All Ages | All causes | 2019 | Rate | Peritoneal and intra-abdominal infections                 | KP | Drug-susceptible infection | 0.298 | 0.453 | 0.178 |
| Deaths | High-income                  | Both | All Ages | All causes | 2019 | Rate | Peritoneal and intra-abdominal infections                 | KP | No infection               | 1.200 | 1.760 | 0.797 |
| Deaths | High-income                  | Both | All Ages | All causes | 2019 | Rate | Urinary tract infections and pyelonephritis               | KP | Drug-susceptible infection | 0.120 | 0.169 | 0.082 |
| Deaths | High-income                  | Both | All Ages | All causes | 2019 | Rate | Urinary tract infections and pyelonephritis               | KP | No infection               | 0.487 | 0.649 | 0.368 |
| Deaths | Latin America and Caribbean  | Both | All Ages | All causes | 2019 | Rate | Bacterial infections of the skin and subcutaneous systems | KP | Drug-susceptible infection | 0.024 | 0.081 | 0.004 |
| Deaths | Latin America and Caribbean  | Both | All Ages | All causes | 2019 | Rate | Bacterial infections of the skin and subcutaneous systems | KP | No infection               | 0.085 | 0.281 | 0.014 |
| Deaths | Latin America and Caribbean  | Both | All Ages | All causes | 2019 | Rate | Bloodstream infections                                    | KP | Drug-susceptible infection | 0.767 | 1.280 | 0.413 |
| Deaths | Latin America and Caribbean  | Both | All Ages | All causes | 2019 | Rate | Bloodstream infections                                    | KP | No infection               | 2.740 | 4.370 | 1.580 |
| Deaths | Latin America and Caribbean  | Both | All Ages | All causes | 2019 | Rate | Endocarditis and other cardiac infections                 | KP | Drug-susceptible infection | 0.030 | 0.041 | 0.021 |
| Deaths | Latin America and Caribbean  | Both | All Ages | All causes | 2019 | Rate | Endocarditis and other cardiac infections                 | KP | No infection               | 0.105 | 0.134 | 0.080 |
| Deaths | Latin America and Caribbean  | Both | All Ages | All causes | 2019 | Rate | Infections of bones, joints, and related organs           | KP | Drug-susceptible infection | 0.003 | 0.008 | 0.001 |
| Deaths | Latin America and Caribbean  | Both | All Ages | All causes | 2019 | Rate | Infections of bones, joints, and related organs           | KP | No infection               | 0.012 | 0.028 | 0.003 |
| Deaths | Latin America and Caribbean  | Both | All Ages | All causes | 2019 | Rate | LRIs and all related infections in the thorax             | KP | Drug-susceptible infection | 0.738 | 0.994 | 0.525 |
| Deaths | Latin America and Caribbean  | Both | All Ages | All causes | 2019 | Rate | LRIs and all related infections in the thorax             | KP | No infection               | 2.630 | 3.340 | 2.050 |
| Deaths | Latin America and Caribbean  | Both | All Ages | All causes | 2019 | Rate | Meningitis and other bacterial CNS infections             | KP | Drug-susceptible infection | 0.032 | 0.051 | 0.020 |
| Deaths | Latin America and Caribbean  | Both | All Ages | All causes | 2019 | Rate | Meningitis and other bacterial CNS infections             | KP | No infection               | 0.115 | 0.182 | 0.077 |
| Deaths | Latin America and Caribbean  | Both | All Ages | All causes | 2019 | Rate | Peritoneal and intra-abdominal infections                 | KP | Drug-susceptible infection | 0.549 | 0.826 | 0.343 |
| Deaths | Latin America and Caribbean  | Both | All Ages | All causes | 2019 | Rate | Peritoneal and intra-abdominal infections                 | KP | No infection               | 1.960 | 2.830 | 1.310 |
| Deaths | Latin America and Caribbean  | Both | All Ages | All causes | 2019 | Rate | Urinary tract infections and pyelonephritis               | KP | Drug-susceptible infection | 0.170 | 0.239 | 0.116 |
| Deaths | Latin America and Caribbean  | Both | All Ages | All causes | 2019 | Rate | Urinary tract infections and pyelonephritis               | KP | No infection               | 0.596 | 0.794 | 0.447 |
| Deaths | North Africa and Middle East | Both | All Ages | All causes | 2019 | Rate | Bacterial infections of the skin and subcutaneous systems | KP | Drug-susceptible infection | 0.015 | 0.056 | 0.002 |
| Deaths | North Africa and Middle East | Both | All Ages | All causes | 2019 | Rate | Bacterial infections of the skin and subcutaneous systems | KP | No infection               | 0.048 | 0.186 | 0.006 |
| Deaths | North Africa and Middle East | Both | All Ages | All causes | 2019 | Rate | Bloodstream infections                                    | KP | Drug-susceptible infection | 0.660 | 1.110 | 0.353 |
| Deaths | North Africa and Middle East | Both | All Ages | All causes | 2019 | Rate | Bloodstream infections                                    | KP | No infection               | 2.200 | 3.500 | 1.250 |
| Deaths | North Africa and Middle East | Both | All Ages | All causes | 2019 | Rate | Endocarditis and other cardiac infections                 | KP | Drug-susceptible infection | 0.025 | 0.037 | 0.016 |
| Deaths | North Africa and Middle East | Both | All Ages | All causes | 2019 | Rate | Endocarditis and other cardiac infections                 | KP | No infection               | 0.081 | 0.116 | 0.056 |
| Deaths | North Africa and Middle East | Both | All Ages | All causes | 2019 | Rate | Infections of bones, joints, and related organs           | KP | Drug-susceptible infection | 0.005 | 0.013 | 0.001 |
| Deaths | North Africa and Middle East | Both | All Ages | All causes | 2019 | Rate | Infections of bones, joints, and related organs           | KP | No infection               | 0.017 | 0.040 | 0.004 |
| Deaths | North Africa and Middle East | Both | All Ages | All causes | 2019 | Rate | LRIs and all related infections in the thorax             | KP | Drug-susceptible infection | 0.579 | 0.809 | 0.388 |
| Deaths | North Africa and Middle East | Both | All Ages | All causes | 2019 | Rate | LRIs and all related infections in the thorax             | KP | No infection               | 1.950 | 2.530 | 1.480 |
| Deaths | North Africa and Middle East | Both | All Ages | All causes | 2019 | Rate | Meningitis and other bacterial CNS infections             | KP | Drug-susceptible infection | 0.059 | 0.111 | 0.032 |
| Deaths | North Africa and Middle East | Both | All Ages | All causes | 2019 | Rate | Meningitis and other bacterial CNS infections             | KP | No infection               | 0.202 | 0.368 | 0.117 |
| Deaths | North Africa and Middle East | Both | All Ages | All causes | 2019 | Rate | Peritoneal and intra-abdominal infections                 | KP | Drug-susceptible infection | 0.454 | 0.709 | 0.268 |
| Deaths | North Africa and Middle East | Both | All Ages | All causes | 2019 | Rate | Peritoneal and intra-abdominal infections                 | KP | No infection               | 1.400 | 2.130 | 0.857 |
| Deaths | North Africa and Middle East | Both | All Ages | All causes | 2019 | Rate | Urinary tract infections and pyelonephritis               | KP | Drug-susceptible infection | 0.062 | 0.113 | 0.030 |
| Deaths | North Africa and Middle East | Both | All Ages | All causes | 2019 | Rate | Urinary tract infections and pyelonephritis               | KP | No infection               | 0.201 | 0.346 | 0.100 |
| Deaths | South Asia                   | Both | All Ages | All causes | 2019 | Rate | Bacterial infections of the skin and subcutaneous systems | KP | Drug-susceptible infection | 0.028 | 0.112 | 0.003 |
| Deaths | South Asia                   | Both | All Ages | All causes | 2019 | Rate | Bacterial infections of the skin and subcutaneous systems | KP | No infection               | 0.078 | 0.308 | 0.008 |
| Deaths | South Asia                   | Both | All Ages | All causes | 2019 | Rate | Bloodstream infections                                    | KP | Drug-susceptible infection | 1.150 | 1.850 | 0.647 |
| Deaths | South Asia                   | Both | All Ages | All causes | 2019 | Rate | Bloodstream infections                                    | KP | No infection               | 3.300 | 5.300 | 1.890 |
| Deaths | South Asia                   | Both | All Ages | All causes | 2019 | Rate | Endocarditis and other cardiac infections                 | KP | Drug-susceptible infection | 0.030 | 0.043 | 0.021 |
| Deaths | South Asia                   | Both | All Ages | All causes | 2019 | Rate | Endocarditis and other cardiac infections                 | KP | No infection               | 0.085 | 0.120 | 0.060 |
| Deaths | South Asia                   | Both | All Ages | All causes | 2019 | Rate | Infections of bones, joints, and related organs           | KP | Drug-susceptible infection | 0.008 | 0.020 | 0.002 |
| Deaths | South Asia                   | Both | All Ages | All causes | 2019 | Rate | Infections of bones, joints, and related organs           | KP | No infection               | 0.023 | 0.054 | 0.006 |

|        |                    |      |          |            |      |      |                                                           |    |                            |       |        |       |
|--------|--------------------|------|----------|------------|------|------|-----------------------------------------------------------|----|----------------------------|-------|--------|-------|
| Deaths | South Asia         | Both | All Ages | All causes | 2019 | Rate | LRIs and all related infections in the thorax             | KP | Drug-susceptible infection | 1.270 | 1.670  | 0.944 |
| Deaths | South Asia         | Both | All Ages | All causes | 2019 | Rate | LRIs and all related infections in the thorax             | KP | No infection               | 3.600 | 4.650  | 2.750 |
| Deaths | South Asia         | Both | All Ages | All causes | 2019 | Rate | Meningitis and other bacterial CNS infections             | KP | Drug-susceptible infection | 0.140 | 0.203  | 0.097 |
| Deaths | South Asia         | Both | All Ages | All causes | 2019 | Rate | Meningitis and other bacterial CNS infections             | KP | No infection               | 0.397 | 0.570  | 0.284 |
| Deaths | South Asia         | Both | All Ages | All causes | 2019 | Rate | Peritoneal and intra-abdominal infections                 | KP | Drug-susceptible infection | 0.654 | 1.020  | 0.402 |
| Deaths | South Asia         | Both | All Ages | All causes | 2019 | Rate | Peritoneal and intra-abdominal infections                 | KP | No infection               | 1.830 | 2.770  | 1.150 |
| Deaths | South Asia         | Both | All Ages | All causes | 2019 | Rate | Urinary tract infections and pyelonephritis               | KP | Drug-susceptible infection | 0.142 | 0.200  | 0.098 |
| Deaths | South Asia         | Both | All Ages | All causes | 2019 | Rate | Urinary tract infections and pyelonephritis               | KP | No infection               | 0.395 | 0.547  | 0.283 |
| Deaths | Sub-Saharan Africa | Both | All Ages | All causes | 2019 | Rate | Bacterial infections of the skin and subcutaneous systems | KP | Drug-susceptible infection | 0.019 | 0.078  | 0.002 |
| Deaths | Sub-Saharan Africa | Both | All Ages | All causes | 2019 | Rate | Bacterial infections of the skin and subcutaneous systems | KP | No infection               | 0.069 | 0.279  | 0.006 |
| Deaths | Sub-Saharan Africa | Both | All Ages | All causes | 2019 | Rate | Bloodstream infections                                    | KP | Drug-susceptible infection | 1.410 | 2.170  | 0.843 |
| Deaths | Sub-Saharan Africa | Both | All Ages | All causes | 2019 | Rate | Bloodstream infections                                    | KP | No infection               | 5.180 | 7.430  | 3.440 |
| Deaths | Sub-Saharan Africa | Both | All Ages | All causes | 2019 | Rate | Endocarditis and other cardiac infections                 | KP | Drug-susceptible infection | 0.020 | 0.030  | 0.013 |
| Deaths | Sub-Saharan Africa | Both | All Ages | All causes | 2019 | Rate | Endocarditis and other cardiac infections                 | KP | No infection               | 0.074 | 0.100  | 0.055 |
| Deaths | Sub-Saharan Africa | Both | All Ages | All causes | 2019 | Rate | Infections of bones, joints, and related organs           | KP | Drug-susceptible infection | 0.005 | 0.014  | 0.001 |
| Deaths | Sub-Saharan Africa | Both | All Ages | All causes | 2019 | Rate | Infections of bones, joints, and related organs           | KP | No infection               | 0.020 | 0.045  | 0.005 |
| Deaths | Sub-Saharan Africa | Both | All Ages | All causes | 2019 | Rate | LRIs and all related infections in the thorax             | KP | Drug-susceptible infection | 2.270 | 3.160  | 1.540 |
| Deaths | Sub-Saharan Africa | Both | All Ages | All causes | 2019 | Rate | LRIs and all related infections in the thorax             | KP | No infection               | 8.360 | 10.427 | 6.650 |
| Deaths | Sub-Saharan Africa | Both | All Ages | All causes | 2019 | Rate | Meningitis and other bacterial CNS infections             | KP | Drug-susceptible infection | 0.471 | 0.751  | 0.277 |
| Deaths | Sub-Saharan Africa | Both | All Ages | All causes | 2019 | Rate | Meningitis and other bacterial CNS infections             | KP | No infection               | 1.700 | 2.460  | 1.160 |
| Deaths | Sub-Saharan Africa | Both | All Ages | All causes | 2019 | Rate | Peritoneal and intra-abdominal infections                 | KP | Drug-susceptible infection | 0.485 | 0.800  | 0.266 |
| Deaths | Sub-Saharan Africa | Both | All Ages | All causes | 2019 | Rate | Peritoneal and intra-abdominal infections                 | KP | No infection               | 1.770 | 2.720  | 1.130 |
| Deaths | Sub-Saharan Africa | Both | All Ages | All causes | 2019 | Rate | Urinary tract infections and pyelonephritis               | KP | Drug-susceptible infection | 0.030 | 0.047  | 0.017 |
| Deaths | Sub-Saharan Africa | Both | All Ages | All causes | 2019 | Rate | Urinary tract infections and pyelonephritis               | KP | No infection               | 0.109 | 0.156  | 0.065 |

**Figure 4A Deaths associated with and attributable to antimicrobial resistance in KP, by GBD region, 2019**

| measure | location                     | sex  | age      | cause      | year | metric | infectious syndrome      | pathogen | associated with resistance |        |        | attributable to resistance |       |       |
|---------|------------------------------|------|----------|------------|------|--------|--------------------------|----------|----------------------------|--------|--------|----------------------------|-------|-------|
|         |                              |      |          |            |      |        |                          |          | value                      | upper  | lower  | value                      | upper | lower |
| Deaths  | South Asia                   | Both | All Ages | All causes | 2019 | Number | All infectious syndromes | KP       | 175218                     | 241051 | 124250 | 61793                      | 87875 | 42813 |
| Deaths  | Western Sub-Saharan Africa   | Both | All Ages | All causes | 2019 | Number | All infectious syndromes | KP       | 93498                      | 120066 | 71731  | 25792                      | 36862 | 17289 |
| Deaths  | Eastern Sub-Saharan Africa   | Both | All Ages | All causes | 2019 | Number | All infectious syndromes | KP       | 63495                      | 81661  | 48820  | 17182                      | 24557 | 11250 |
| Deaths  | East Asia                    | Both | All Ages | All causes | 2019 | Number | All infectious syndromes | KP       | 52680                      | 81774  | 31657  | 14482                      | 25390 | 7323  |
| Deaths  | Southeast Asia               | Both | All Ages | All causes | 2019 | Number | All infectious syndromes | KP       | 49646                      | 68918  | 34664  | 15241                      | 22239 | 9814  |
| Deaths  | North Africa and Middle East | Both | All Ages | All causes | 2019 | Number | All infectious syndromes | KP       | 37162                      | 53370  | 25053  | 11317                      | 16947 | 7133  |
| Deaths  | Western Europe               | Both | All Ages | All causes | 2019 | Number | All infectious syndromes | KP       | 23899                      | 33107  | 16885  | 5917                       | 8798  | 3855  |
| Deaths  | Eastern Europe               | Both | All Ages | All causes | 2019 | Number | All infectious syndromes | KP       | 22459                      | 32449  | 14632  | 7460                       | 11076 | 4788  |
| Deaths  | Tropical Latin America       | Both | All Ages | All causes | 2019 | Number | All infectious syndromes | KP       | 19817                      | 26427  | 14541  | 5902                       | 8241  | 4110  |
| Deaths  | Central Sub-Saharan Africa   | Both | All Ages | All causes | 2019 | Number | All infectious syndromes | KP       | 18649                      | 24503  | 14121  | 4850                       | 7137  | 3029  |
| Deaths  | Central Latin America        | Both | All Ages | All causes | 2019 | Number | All infectious syndromes | KP       | 17397                      | 24593  | 11801  | 4676                       | 7181  | 2827  |
| Deaths  | High-income North America    | Both | All Ages | All causes | 2019 | Number | All infectious syndromes | KP       | 11644                      | 16558  | 8083   | 2801                       | 4332  | 1786  |
| Deaths  | Central Europe               | Both | All Ages | All causes | 2019 | Number | All infectious syndromes | KP       | 10955                      | 16441  | 7044   | 3145                       | 4895  | 1889  |
| Deaths  | Southern Sub-Saharan Africa  | Both | All Ages | All causes | 2019 | Number | All infectious syndromes | KP       | 10793                      | 13960  | 8254   | 2966                       | 4351  | 1888  |
| Deaths  | Central Asia                 | Both | All Ages | All causes | 2019 | Number | All infectious syndromes | KP       | 7525                       | 10733  | 5130   | 2039                       | 3193  | 1200  |
| Deaths  | High-income Asia Pacific     | Both | All Ages | All causes | 2019 | Number | All infectious syndromes | KP       | 7043                       | 9524   | 5182   | 1610                       | 2430  | 998   |
| Deaths  | Southern Latin America       | Both | All Ages | All causes | 2019 | Number | All infectious syndromes | KP       | 6762                       | 8897   | 5095   | 1944                       | 2800  | 1315  |
| Deaths  | Andean Latin America         | Both | All Ages | All causes | 2019 | Number | All infectious syndromes | KP       | 6479                       | 8868   | 4531   | 1758                       | 2585  | 1132  |
| Deaths  | Caribbean                    | Both | All Ages | All causes | 2019 | Number | All infectious syndromes | KP       | 4478                       | 6331   | 3092   | 1174                       | 1827  | 703   |
| Deaths  | Oceania                      | Both | All Ages | All causes | 2019 | Number | All infectious syndromes | KP       | 1425                       | 1981   | 989    | 394                        | 611   | 223   |
| Deaths  | Australasia                  | Both | All Ages | All causes | 2019 | Number | All infectious syndromes | KP       | 712                        | 1030   | 475    | 149                        | 233   | 92    |

Figure 4B All-age mortality rates associated with and attributable to antimicrobial resistance in KP, by GBD region, 2019

| measure | location                     | sex  | age      | cause      | year | metric | infectious syndrome      | pathogen | associated with resistance (per 100,000) |       |       | attributable to resistance (per 100,000) |       |       |
|---------|------------------------------|------|----------|------------|------|--------|--------------------------|----------|------------------------------------------|-------|-------|------------------------------------------|-------|-------|
|         |                              |      |          |            |      |        |                          |          | value                                    | upper | lower | value                                    | upper | lower |
| Deaths  | Western Sub-Saharan Africa   | Both | All Ages | All causes | 2019 | Rate   | All infectious syndromes | KP       | 20.49                                    | 26.31 | 15.72 | 5.65                                     | 8.08  | 3.79  |
| Deaths  | Eastern Sub-Saharan Africa   | Both | All Ages | All causes | 2019 | Rate   | All infectious syndromes | KP       | 15.42                                    | 19.83 | 11.86 | 4.17                                     | 5.96  | 2.73  |
| Deaths  | Central Sub-Saharan Africa   | Both | All Ages | All causes | 2019 | Rate   | All infectious syndromes | KP       | 14.18                                    | 18.63 | 10.73 | 3.69                                     | 5.43  | 2.30  |
| Deaths  | Southern Sub-Saharan Africa  | Both | All Ages | All causes | 2019 | Rate   | All infectious syndromes | KP       | 13.74                                    | 17.77 | 10.50 | 3.77                                     | 5.54  | 2.40  |
| Deaths  | Oceania                      | Both | All Ages | All causes | 2019 | Rate   | All infectious syndromes | KP       | 10.74                                    | 14.92 | 7.45  | 2.97                                     | 4.60  | 1.68  |
| Deaths  | Eastern Europe               | Both | All Ages | All causes | 2019 | Rate   | All infectious syndromes | KP       | 10.70                                    | 15.45 | 6.97  | 3.55                                     | 5.27  | 2.28  |
| Deaths  | Andean Latin America         | Both | All Ages | All causes | 2019 | Rate   | All infectious syndromes | KP       | 10.19                                    | 13.95 | 7.12  | 2.76                                     | 4.07  | 1.78  |
| Deaths  | Southern Latin America       | Both | All Ages | All causes | 2019 | Rate   | All infectious syndromes | KP       | 10.13                                    | 13.33 | 7.63  | 2.91                                     | 4.19  | 1.97  |
| Deaths  | South Asia                   | Both | All Ages | All causes | 2019 | Rate   | All infectious syndromes | KP       | 9.71                                     | 13.35 | 6.88  | 3.42                                     | 4.87  | 2.37  |
| Deaths  | Central Europe               | Both | All Ages | All causes | 2019 | Rate   | All infectious syndromes | KP       | 9.59                                     | 14.39 | 6.17  | 2.75                                     | 4.29  | 1.65  |
| Deaths  | Caribbean                    | Both | All Ages | All causes | 2019 | Rate   | All infectious syndromes | KP       | 9.49                                     | 13.42 | 6.56  | 2.49                                     | 3.87  | 1.49  |
| Deaths  | Tropical Latin America       | Both | All Ages | All causes | 2019 | Rate   | All infectious syndromes | KP       | 8.86                                     | 11.82 | 6.50  | 2.64                                     | 3.69  | 1.84  |
| Deaths  | Central Asia                 | Both | All Ages | All causes | 2019 | Rate   | All infectious syndromes | KP       | 8.04                                     | 11.48 | 5.48  | 2.18                                     | 3.41  | 1.28  |
| Deaths  | Southeast Asia               | Both | All Ages | All causes | 2019 | Rate   | All infectious syndromes | KP       | 7.37                                     | 10.23 | 5.14  | 2.26                                     | 3.30  | 1.46  |
| Deaths  | Central Latin America        | Both | All Ages | All causes | 2019 | Rate   | All infectious syndromes | KP       | 6.96                                     | 9.84  | 4.72  | 1.87                                     | 2.87  | 1.13  |
| Deaths  | North Africa and Middle East | Both | All Ages | All causes | 2019 | Rate   | All infectious syndromes | KP       | 6.10                                     | 8.77  | 4.12  | 1.86                                     | 2.78  | 1.17  |
| Deaths  | Western Europe               | Both | All Ages | All causes | 2019 | Rate   | All infectious syndromes | KP       | 5.48                                     | 7.59  | 3.87  | 1.36                                     | 2.02  | 0.88  |
| Deaths  | High-income Asia Pacific     | Both | All Ages | All causes | 2019 | Rate   | All infectious syndromes | KP       | 3.76                                     | 5.08  | 2.77  | 0.86                                     | 1.30  | 0.53  |
| Deaths  | East Asia                    | Both | All Ages | All causes | 2019 | Rate   | All infectious syndromes | KP       | 3.58                                     | 5.55  | 2.15  | 0.98                                     | 1.72  | 0.50  |
| Deaths  | High-income North America    | Both | All Ages | All causes | 2019 | Rate   | All infectious syndromes | KP       | 3.19                                     | 4.54  | 2.22  | 0.77                                     | 1.19  | 0.49  |
| Deaths  | Australasia                  | Both | All Ages | All causes | 2019 | Rate   | All infectious syndromes | KP       | 2.45                                     | 3.54  | 1.63  | 0.51                                     | 0.80  | 0.32  |



**S.Figure 1 Regional deaths associated with and attributable to KP antimicrobial resistance by infectious syndrome, 2019**

| measure | location                     | sex  | age      | cause      | year | metric | infectious syndrome      | pathogen | counterfactual             | value  | upper  | lower  |
|---------|------------------------------|------|----------|------------|------|--------|--------------------------|----------|----------------------------|--------|--------|--------|
| Deaths  | Global                       | Both | All Ages | All causes | 2019 | Number | All infectious syndromes | KP       | Drug-susceptible infection | 192591 | 272017 | 130181 |
| Deaths  | Global                       | Both | All Ages | All causes | 2019 | Number | All infectious syndromes | KP       | No infection               | 641703 | 863302 | 465322 |
| Deaths  | East Asia                    | Both | All Ages | All causes | 2019 | Number | All infectious syndromes | KP       | Drug-susceptible infection | 14482  | 25390  | 7323   |
| Deaths  | East Asia                    | Both | All Ages | All causes | 2019 | Number | All infectious syndromes | KP       | No infection               | 52680  | 81774  | 31657  |
| Deaths  | Southeast Asia               | Both | All Ages | All causes | 2019 | Number | All infectious syndromes | KP       | Drug-susceptible infection | 15241  | 22239  | 9814   |
| Deaths  | Southeast Asia               | Both | All Ages | All causes | 2019 | Number | All infectious syndromes | KP       | No infection               | 49646  | 68918  | 34664  |
| Deaths  | Oceania                      | Both | All Ages | All causes | 2019 | Number | All infectious syndromes | KP       | Drug-susceptible infection | 394    | 611    | 223    |
| Deaths  | Oceania                      | Both | All Ages | All causes | 2019 | Number | All infectious syndromes | KP       | No infection               | 1425   | 1981   | 989    |
| Deaths  | Central Asia                 | Both | All Ages | All causes | 2019 | Number | All infectious syndromes | KP       | Drug-susceptible infection | 2039   | 3193   | 1200   |
| Deaths  | Central Asia                 | Both | All Ages | All causes | 2019 | Number | All infectious syndromes | KP       | No infection               | 7525   | 10733  | 5130   |
| Deaths  | Central Europe               | Both | All Ages | All causes | 2019 | Number | All infectious syndromes | KP       | Drug-susceptible infection | 3145   | 4895   | 1889   |
| Deaths  | Central Europe               | Both | All Ages | All causes | 2019 | Number | All infectious syndromes | KP       | No infection               | 10955  | 16441  | 7044   |
| Deaths  | Eastern Europe               | Both | All Ages | All causes | 2019 | Number | All infectious syndromes | KP       | Drug-susceptible infection | 7460   | 11076  | 4788   |
| Deaths  | Eastern Europe               | Both | All Ages | All causes | 2019 | Number | All infectious syndromes | KP       | No infection               | 22459  | 32449  | 14632  |
| Deaths  | High-income Asia Pacific     | Both | All Ages | All causes | 2019 | Number | All infectious syndromes | KP       | Drug-susceptible infection | 1610   | 2430   | 998    |
| Deaths  | High-income Asia Pacific     | Both | All Ages | All causes | 2019 | Number | All infectious syndromes | KP       | No infection               | 7043   | 9524   | 5182   |
| Deaths  | Australasia                  | Both | All Ages | All causes | 2019 | Number | All infectious syndromes | KP       | Drug-susceptible infection | 149    | 233    | 92     |
| Deaths  | Australasia                  | Both | All Ages | All causes | 2019 | Number | All infectious syndromes | KP       | No infection               | 712    | 1030   | 475    |
| Deaths  | Western Europe               | Both | All Ages | All causes | 2019 | Number | All infectious syndromes | KP       | Drug-susceptible infection | 5917   | 8798   | 3855   |
| Deaths  | Western Europe               | Both | All Ages | All causes | 2019 | Number | All infectious syndromes | KP       | No infection               | 23899  | 33107  | 16885  |
| Deaths  | Southern Latin America       | Both | All Ages | All causes | 2019 | Number | All infectious syndromes | KP       | Drug-susceptible infection | 1944   | 2800   | 1315   |
| Deaths  | Southern Latin America       | Both | All Ages | All causes | 2019 | Number | All infectious syndromes | KP       | No infection               | 6762   | 8897   | 5095   |
| Deaths  | High-income North America    | Both | All Ages | All causes | 2019 | Number | All infectious syndromes | KP       | Drug-susceptible infection | 2801   | 4332   | 1786   |
| Deaths  | High-income North America    | Both | All Ages | All causes | 2019 | Number | All infectious syndromes | KP       | No infection               | 11644  | 16558  | 8083   |
| Deaths  | Caribbean                    | Both | All Ages | All causes | 2019 | Number | All infectious syndromes | KP       | Drug-susceptible infection | 1174   | 1827   | 703    |
| Deaths  | Caribbean                    | Both | All Ages | All causes | 2019 | Number | All infectious syndromes | KP       | No infection               | 4478   | 6331   | 3092   |
| Deaths  | Andean Latin America         | Both | All Ages | All causes | 2019 | Number | All infectious syndromes | KP       | Drug-susceptible infection | 1758   | 2585   | 1132   |
| Deaths  | Andean Latin America         | Both | All Ages | All causes | 2019 | Number | All infectious syndromes | KP       | No infection               | 6479   | 8868   | 4531   |
| Deaths  | Central Latin America        | Both | All Ages | All causes | 2019 | Number | All infectious syndromes | KP       | Drug-susceptible infection | 4676   | 7181   | 2827   |
| Deaths  | Central Latin America        | Both | All Ages | All causes | 2019 | Number | All infectious syndromes | KP       | No infection               | 17397  | 24593  | 11801  |
| Deaths  | Tropical Latin America       | Both | All Ages | All causes | 2019 | Number | All infectious syndromes | KP       | Drug-susceptible infection | 5902   | 8241   | 4110   |
| Deaths  | Tropical Latin America       | Both | All Ages | All causes | 2019 | Number | All infectious syndromes | KP       | No infection               | 19817  | 26427  | 14541  |
| Deaths  | North Africa and Middle East | Both | All Ages | All causes | 2019 | Number | All infectious syndromes | KP       | Drug-susceptible infection | 11317  | 16947  | 7133   |
| Deaths  | North Africa and Middle East | Both | All Ages | All causes | 2019 | Number | All infectious syndromes | KP       | No infection               | 37162  | 53370  | 25053  |
| Deaths  | South Asia                   | Both | All Ages | All causes | 2019 | Number | All infectious syndromes | KP       | Drug-susceptible infection | 61793  | 87875  | 42813  |
| Deaths  | South Asia                   | Both | All Ages | All causes | 2019 | Number | All infectious syndromes | KP       | No infection               | 175218 | 241051 | 124250 |
| Deaths  | Central Sub-Saharan Africa   | Both | All Ages | All causes | 2019 | Number | All infectious syndromes | KP       | Drug-susceptible infection | 4850   | 7137   | 3029   |
| Deaths  | Central Sub-Saharan Africa   | Both | All Ages | All causes | 2019 | Number | All infectious syndromes | KP       | No infection               | 18649  | 24503  | 14121  |
| Deaths  | Eastern Sub-Saharan Africa   | Both | All Ages | All causes | 2019 | Number | All infectious syndromes | KP       | Drug-susceptible infection | 17182  | 24557  | 11250  |
| Deaths  | Eastern Sub-Saharan Africa   | Both | All Ages | All causes | 2019 | Number | All infectious syndromes | KP       | No infection               | 63495  | 81661  | 48820  |
| Deaths  | Southern Sub-Saharan Africa  | Both | All Ages | All causes | 2019 | Number | All infectious syndromes | KP       | Drug-susceptible infection | 2966   | 4351   | 1888   |
| Deaths  | Southern Sub-Saharan Africa  | Both | All Ages | All causes | 2019 | Number | All infectious syndromes | KP       | No infection               | 10793  | 13960  | 8254   |
| Deaths  | Western Sub-Saharan Africa   | Both | All Ages | All causes | 2019 | Number | All infectious syndromes | KP       | Drug-susceptible infection | 25792  | 36862  | 17289  |
| Deaths  | Western Sub-Saharan Africa   | Both | All Ages | All causes | 2019 | Number | All infectious syndromes | KP       | No infection               | 93498  | 120066 | 71731  |

|        |                              |      |          |            |      |        |                                                           |    |                            |        |        |        |
|--------|------------------------------|------|----------|------------|------|--------|-----------------------------------------------------------|----|----------------------------|--------|--------|--------|
| Deaths | Global                       | Both | All Ages | All causes | 2019 | Number | Bacterial infections of the skin and subcutaneous systems | KP | Drug-susceptible infection | 1614   | 5952   | 229    |
| Deaths | Global                       | Both | All Ages | All causes | 2019 | Number | Bacterial infections of the skin and subcutaneous systems | KP | No infection               | 5343   | 19802  | 773    |
| Deaths | East Asia                    | Both | All Ages | All causes | 2019 | Number | Bacterial infections of the skin and subcutaneous systems | KP | Drug-susceptible infection | 218    | 812    | 25     |
| Deaths | East Asia                    | Both | All Ages | All causes | 2019 | Number | Bacterial infections of the skin and subcutaneous systems | KP | No infection               | 793    | 2925   | 98     |
| Deaths | Southeast Asia               | Both | All Ages | All causes | 2019 | Number | Bacterial infections of the skin and subcutaneous systems | KP | Drug-susceptible infection | 170    | 610    | 25     |
| Deaths | Southeast Asia               | Both | All Ages | All causes | 2019 | Number | Bacterial infections of the skin and subcutaneous systems | KP | No infection               | 551    | 2033   | 80     |
| Deaths | Oceania                      | Both | All Ages | All causes | 2019 | Number | Bacterial infections of the skin and subcutaneous systems | KP | Drug-susceptible infection | 2      | 9      | 0      |
| Deaths | Oceania                      | Both | All Ages | All causes | 2019 | Number | Bacterial infections of the skin and subcutaneous systems | KP | No infection               | 9      | 36     | 1      |
| Deaths | Central Asia                 | Both | All Ages | All causes | 2019 | Number | Bacterial infections of the skin and subcutaneous systems | KP | Drug-susceptible infection | 13     | 48     | 1      |
| Deaths | Central Asia                 | Both | All Ages | All causes | 2019 | Number | Bacterial infections of the skin and subcutaneous systems | KP | No infection               | 47     | 182    | 5      |
| Deaths | Central Europe               | Both | All Ages | All causes | 2019 | Number | Bacterial infections of the skin and subcutaneous systems | KP | Drug-susceptible infection | 31     | 118    | 4      |
| Deaths | Central Europe               | Both | All Ages | All causes | 2019 | Number | Bacterial infections of the skin and subcutaneous systems | KP | No infection               | 108    | 398    | 14     |
| Deaths | Eastern Europe               | Both | All Ages | All causes | 2019 | Number | Bacterial infections of the skin and subcutaneous systems | KP | Drug-susceptible infection | 90     | 317    | 14     |
| Deaths | Eastern Europe               | Both | All Ages | All causes | 2019 | Number | Bacterial infections of the skin and subcutaneous systems | KP | No infection               | 269    | 938    | 41     |
| Deaths | High-income Asia Pacific     | Both | All Ages | All causes | 2019 | Number | Bacterial infections of the skin and subcutaneous systems | KP | Drug-susceptible infection | 15     | 52     | 2      |
| Deaths | High-income Asia Pacific     | Both | All Ages | All causes | 2019 | Number | Bacterial infections of the skin and subcutaneous systems | KP | No infection               | 65     | 232    | 9      |
| Deaths | Australasia                  | Both | All Ages | All causes | 2019 | Number | Bacterial infections of the skin and subcutaneous systems | KP | Drug-susceptible infection | 3      | 9      | 0      |
| Deaths | Australasia                  | Both | All Ages | All causes | 2019 | Number | Bacterial infections of the skin and subcutaneous systems | KP | No infection               | 13     | 42     | 2      |
| Deaths | Western Europe               | Both | All Ages | All causes | 2019 | Number | Bacterial infections of the skin and subcutaneous systems | KP | Drug-susceptible infection | 80     | 270    | 12     |
| Deaths | Western Europe               | Both | All Ages | All causes | 2019 | Number | Bacterial infections of the skin and subcutaneous systems | KP | No infection               | 324    | 1106   | 48     |
| Deaths | Southern Latin America       | Both | All Ages | All causes | 2019 | Number | Bacterial infections of the skin and subcutaneous systems | KP | Drug-susceptible infection | 22     | 73     | 4      |
| Deaths | Southern Latin America       | Both | All Ages | All causes | 2019 | Number | Bacterial infections of the skin and subcutaneous systems | KP | No infection               | 75     | 244    | 13     |
| Deaths | High-income North America    | Both | All Ages | All causes | 2019 | Number | Bacterial infections of the skin and subcutaneous systems | KP | Drug-susceptible infection | 35     | 114    | 5      |
| Deaths | High-income North America    | Both | All Ages | All causes | 2019 | Number | Bacterial infections of the skin and subcutaneous systems | KP | No infection               | 144    | 468    | 24     |
| Deaths | Caribbean                    | Both | All Ages | All causes | 2019 | Number | Bacterial infections of the skin and subcutaneous systems | KP | Drug-susceptible infection | 17     | 59     | 3      |
| Deaths | Caribbean                    | Both | All Ages | All causes | 2019 | Number | Bacterial infections of the skin and subcutaneous systems | KP | No infection               | 63     | 207    | 10     |
| Deaths | Andean Latin America         | Both | All Ages | All causes | 2019 | Number | Bacterial infections of the skin and subcutaneous systems | KP | Drug-susceptible infection | 9      | 33     | 1      |
| Deaths | Andean Latin America         | Both | All Ages | All causes | 2019 | Number | Bacterial infections of the skin and subcutaneous systems | KP | No infection               | 33     | 122    | 4      |
| Deaths | Central Latin America        | Both | All Ages | All causes | 2019 | Number | Bacterial infections of the skin and subcutaneous systems | KP | Drug-susceptible infection | 50     | 173    | 8      |
| Deaths | Central Latin America        | Both | All Ages | All causes | 2019 | Number | Bacterial infections of the skin and subcutaneous systems | KP | No infection               | 184    | 657    | 30     |
| Deaths | Tropical Latin America       | Both | All Ages | All causes | 2019 | Number | Bacterial infections of the skin and subcutaneous systems | KP | Drug-susceptible infection | 64     | 221    | 10     |
| Deaths | Tropical Latin America       | Both | All Ages | All causes | 2019 | Number | Bacterial infections of the skin and subcutaneous systems | KP | No infection               | 215    | 724    | 38     |
| Deaths | North Africa and Middle East | Both | All Ages | All causes | 2019 | Number | Bacterial infections of the skin and subcutaneous systems | KP | Drug-susceptible infection | 90     | 340    | 11     |
| Deaths | North Africa and Middle East | Both | All Ages | All causes | 2019 | Number | Bacterial infections of the skin and subcutaneous systems | KP | No infection               | 295    | 1132   | 35     |
| Deaths | South Asia                   | Both | All Ages | All causes | 2019 | Number | Bacterial infections of the skin and subcutaneous systems | KP | Drug-susceptible infection | 506    | 2026   | 53     |
| Deaths | South Asia                   | Both | All Ages | All causes | 2019 | Number | Bacterial infections of the skin and subcutaneous systems | KP | No infection               | 1413   | 5552   | 148    |
| Deaths | Central Sub-Saharan Africa   | Both | All Ages | All causes | 2019 | Number | Bacterial infections of the skin and subcutaneous systems | KP | Drug-susceptible infection | 22     | 92     | 2      |
| Deaths | Central Sub-Saharan Africa   | Both | All Ages | All causes | 2019 | Number | Bacterial infections of the skin and subcutaneous systems | KP | No infection               | 83     | 350    | 7      |
| Deaths | Eastern Sub-Saharan Africa   | Both | All Ages | All causes | 2019 | Number | Bacterial infections of the skin and subcutaneous systems | KP | Drug-susceptible infection | 72     | 299    | 7      |
| Deaths | Eastern Sub-Saharan Africa   | Both | All Ages | All causes | 2019 | Number | Bacterial infections of the skin and subcutaneous systems | KP | No infection               | 266    | 1081   | 24     |
| Deaths | Southern Sub-Saharan Africa  | Both | All Ages | All causes | 2019 | Number | Bacterial infections of the skin and subcutaneous systems | KP | Drug-susceptible infection | 23     | 89     | 3      |
| Deaths | Southern Sub-Saharan Africa  | Both | All Ages | All causes | 2019 | Number | Bacterial infections of the skin and subcutaneous systems | KP | No infection               | 83     | 319    | 10     |
| Deaths | Western Sub-Saharan Africa   | Both | All Ages | All causes | 2019 | Number | Bacterial infections of the skin and subcutaneous systems | KP | Drug-susceptible infection | 86     | 348    | 8      |
| Deaths | Western Sub-Saharan Africa   | Both | All Ages | All causes | 2019 | Number | Bacterial infections of the skin and subcutaneous systems | KP | No infection               | 313    | 1244   | 29     |
| Deaths | Global                       | Both | All Ages | All causes | 2019 | Number | Bloodstream infections                                    | KP | Drug-susceptible infection | 64308  | 104487 | 36134  |
| Deaths | Global                       | Both | All Ages | All causes | 2019 | Number | Bloodstream infections                                    | KP | No infection               | 214528 | 335332 | 128753 |
| Deaths | East Asia                    | Both | All Ages | All causes | 2019 | Number | Bloodstream infections                                    | KP | Drug-susceptible infection | 6104   | 11728  | 2763   |
| Deaths | East Asia                    | Both | All Ages | All causes | 2019 | Number | Bloodstream infections                                    | KP | No infection               | 22229  | 37953  | 11979  |

|        |                              |      |          |            |      |        |                                           |    |                            |       |       |       |
|--------|------------------------------|------|----------|------------|------|--------|-------------------------------------------|----|----------------------------|-------|-------|-------|
| Deaths | Southeast Asia               | Both | All Ages | All causes | 2019 | Number | Bloodstream infections                    | KP | Drug-susceptible infection | 4754  | 8021  | 2562  |
| Deaths | Southeast Asia               | Both | All Ages | All causes | 2019 | Number | Bloodstream infections                    | KP | No infection               | 15385 | 24924 | 8868  |
| Deaths | Oceania                      | Both | All Ages | All causes | 2019 | Number | Bloodstream infections                    | KP | Drug-susceptible infection | 116   | 204   | 58    |
| Deaths | Oceania                      | Both | All Ages | All causes | 2019 | Number | Bloodstream infections                    | KP | No infection               | 420   | 659   | 243   |
| Deaths | Central Asia                 | Both | All Ages | All causes | 2019 | Number | Bloodstream infections                    | KP | Drug-susceptible infection | 735   | 1316  | 374   |
| Deaths | Central Asia                 | Both | All Ages | All causes | 2019 | Number | Bloodstream infections                    | KP | No infection               | 2712  | 4548  | 1516  |
| Deaths | Central Europe               | Both | All Ages | All causes | 2019 | Number | Bloodstream infections                    | KP | Drug-susceptible infection | 1245  | 2216  | 600   |
| Deaths | Central Europe               | Both | All Ages | All causes | 2019 | Number | Bloodstream infections                    | KP | No infection               | 4319  | 7453  | 2288  |
| Deaths | Eastern Europe               | Both | All Ages | All causes | 2019 | Number | Bloodstream infections                    | KP | Drug-susceptible infection | 2910  | 5084  | 1527  |
| Deaths | Eastern Europe               | Both | All Ages | All causes | 2019 | Number | Bloodstream infections                    | KP | No infection               | 8758  | 14765 | 4640  |
| Deaths | High-income Asia Pacific     | Both | All Ages | All causes | 2019 | Number | Bloodstream infections                    | KP | Drug-susceptible infection | 476   | 826   | 246   |
| Deaths | High-income Asia Pacific     | Both | All Ages | All causes | 2019 | Number | Bloodstream infections                    | KP | No infection               | 2046  | 3357  | 1135  |
| Deaths | Australasia                  | Both | All Ages | All causes | 2019 | Number | Bloodstream infections                    | KP | Drug-susceptible infection | 55    | 99    | 28    |
| Deaths | Australasia                  | Both | All Ages | All causes | 2019 | Number | Bloodstream infections                    | KP | No infection               | 260   | 447   | 138   |
| Deaths | Western Europe               | Both | All Ages | All causes | 2019 | Number | Bloodstream infections                    | KP | Drug-susceptible infection | 1953  | 3394  | 994   |
| Deaths | Western Europe               | Both | All Ages | All causes | 2019 | Number | Bloodstream infections                    | KP | No infection               | 7795  | 13165 | 4154  |
| Deaths | Southern Latin America       | Both | All Ages | All causes | 2019 | Number | Bloodstream infections                    | KP | Drug-susceptible infection | 523   | 927   | 265   |
| Deaths | Southern Latin America       | Both | All Ages | All causes | 2019 | Number | Bloodstream infections                    | KP | No infection               | 1822  | 3079  | 991   |
| Deaths | High-income North America    | Both | All Ages | All causes | 2019 | Number | Bloodstream infections                    | KP | Drug-susceptible infection | 953   | 1681  | 485   |
| Deaths | High-income North America    | Both | All Ages | All causes | 2019 | Number | Bloodstream infections                    | KP | No infection               | 3956  | 6702  | 2140  |
| Deaths | Caribbean                    | Both | All Ages | All causes | 2019 | Number | Bloodstream infections                    | KP | Drug-susceptible infection | 395   | 679   | 206   |
| Deaths | Caribbean                    | Both | All Ages | All causes | 2019 | Number | Bloodstream infections                    | KP | No infection               | 1519  | 2379  | 876   |
| Deaths | Andean Latin America         | Both | All Ages | All causes | 2019 | Number | Bloodstream infections                    | KP | Drug-susceptible infection | 556   | 923   | 306   |
| Deaths | Andean Latin America         | Both | All Ages | All causes | 2019 | Number | Bloodstream infections                    | KP | No infection               | 2041  | 3186  | 1180  |
| Deaths | Central Latin America        | Both | All Ages | All causes | 2019 | Number | Bloodstream infections                    | KP | Drug-susceptible infection | 1678  | 2882  | 871   |
| Deaths | Central Latin America        | Both | All Ages | All causes | 2019 | Number | Bloodstream infections                    | KP | No infection               | 6239  | 10049 | 3449  |
| Deaths | Tropical Latin America       | Both | All Ages | All causes | 2019 | Number | Bloodstream infections                    | KP | Drug-susceptible infection | 1849  | 3047  | 1004  |
| Deaths | Tropical Latin America       | Both | All Ages | All causes | 2019 | Number | Bloodstream infections                    | KP | No infection               | 6213  | 10157 | 3580  |
| Deaths | North Africa and Middle East | Both | All Ages | All causes | 2019 | Number | Bloodstream infections                    | KP | Drug-susceptible infection | 4016  | 6768  | 2150  |
| Deaths | North Africa and Middle East | Both | All Ages | All causes | 2019 | Number | Bloodstream infections                    | KP | No infection               | 13387 | 21301 | 7627  |
| Deaths | South Asia                   | Both | All Ages | All causes | 2019 | Number | Bloodstream infections                    | KP | Drug-susceptible infection | 20796 | 33393 | 11683 |
| Deaths | South Asia                   | Both | All Ages | All causes | 2019 | Number | Bloodstream infections                    | KP | No infection               | 59573 | 95764 | 34167 |
| Deaths | Central Sub-Saharan Africa   | Both | All Ages | All causes | 2019 | Number | Bloodstream infections                    | KP | Drug-susceptible infection | 1359  | 2224  | 756   |
| Deaths | Central Sub-Saharan Africa   | Both | All Ages | All causes | 2019 | Number | Bloodstream infections                    | KP | No infection               | 5223  | 7641  | 3444  |
| Deaths | Eastern Sub-Saharan Africa   | Both | All Ages | All causes | 2019 | Number | Bloodstream infections                    | KP | Drug-susceptible infection | 5653  | 8800  | 3418  |
| Deaths | Eastern Sub-Saharan Africa   | Both | All Ages | All causes | 2019 | Number | Bloodstream infections                    | KP | No infection               | 20877 | 30247 | 13824 |
| Deaths | Southern Sub-Saharan Africa  | Both | All Ages | All causes | 2019 | Number | Bloodstream infections                    | KP | Drug-susceptible infection | 1036  | 1658  | 599   |
| Deaths | Southern Sub-Saharan Africa  | Both | All Ages | All causes | 2019 | Number | Bloodstream infections                    | KP | No infection               | 3750  | 5524  | 2440  |
| Deaths | Western Sub-Saharan Africa   | Both | All Ages | All causes | 2019 | Number | Bloodstream infections                    | KP | Drug-susceptible infection | 7144  | 11004 | 4263  |
| Deaths | Western Sub-Saharan Africa   | Both | All Ages | All causes | 2019 | Number | Bloodstream infections                    | KP | No infection               | 26013 | 37682 | 17165 |
| Deaths | Global                       | Both | All Ages | All causes | 2019 | Number | Endocarditis and other cardiac infections | KP | Drug-susceptible infection | 2271  | 3316  | 1525  |
| Deaths | Global                       | Both | All Ages | All causes | 2019 | Number | Endocarditis and other cardiac infections | KP | No infection               | 7777  | 10805 | 5707  |
| Deaths | East Asia                    | Both | All Ages | All causes | 2019 | Number | Endocarditis and other cardiac infections | KP | Drug-susceptible infection | 182   | 339   | 89    |
| Deaths | East Asia                    | Both | All Ages | All causes | 2019 | Number | Endocarditis and other cardiac infections | KP | No infection               | 657   | 1102  | 368   |
| Deaths | Southeast Asia               | Both | All Ages | All causes | 2019 | Number | Endocarditis and other cardiac infections | KP | Drug-susceptible infection | 191   | 276   | 134   |
| Deaths | Southeast Asia               | Both | All Ages | All causes | 2019 | Number | Endocarditis and other cardiac infections | KP | No infection               | 624   | 837   | 471   |
| Deaths | Oceania                      | Both | All Ages | All causes | 2019 | Number | Endocarditis and other cardiac infections | KP | Drug-susceptible infection | 3     | 5     | 2     |
| Deaths | Oceania                      | Both | All Ages | All causes | 2019 | Number | Endocarditis and other cardiac infections | KP | No infection               | 13    | 18    | 9     |

|        |                              |      |          |            |      |        |                                                 |    |                            |      |      |      |
|--------|------------------------------|------|----------|------------|------|--------|-------------------------------------------------|----|----------------------------|------|------|------|
| Deaths | Central Asia                 | Both | All Ages | All causes | 2019 | Number | Endocarditis and other cardiac infections       | KP | Drug-susceptible infection | 21   | 36   | 11   |
| Deaths | Central Asia                 | Both | All Ages | All causes | 2019 | Number | Endocarditis and other cardiac infections       | KP | No infection               | 76   | 123  | 45   |
| Deaths | Central Europe               | Both | All Ages | All causes | 2019 | Number | Endocarditis and other cardiac infections       | KP | Drug-susceptible infection | 127  | 229  | 65   |
| Deaths | Central Europe               | Both | All Ages | All causes | 2019 | Number | Endocarditis and other cardiac infections       | KP | No infection               | 447  | 740  | 245  |
| Deaths | Eastern Europe               | Both | All Ages | All causes | 2019 | Number | Endocarditis and other cardiac infections       | KP | Drug-susceptible infection | 181  | 298  | 106  |
| Deaths | Eastern Europe               | Both | All Ages | All causes | 2019 | Number | Endocarditis and other cardiac infections       | KP | No infection               | 564  | 930  | 335  |
| Deaths | High-income Asia Pacific     | Both | All Ages | All causes | 2019 | Number | Endocarditis and other cardiac infections       | KP | Drug-susceptible infection | 44   | 68   | 24   |
| Deaths | High-income Asia Pacific     | Both | All Ages | All causes | 2019 | Number | Endocarditis and other cardiac infections       | KP | No infection               | 196  | 273  | 114  |
| Deaths | Australasia                  | Both | All Ages | All causes | 2019 | Number | Endocarditis and other cardiac infections       | KP | Drug-susceptible infection | 5    | 8    | 3    |
| Deaths | Australasia                  | Both | All Ages | All causes | 2019 | Number | Endocarditis and other cardiac infections       | KP | No infection               | 25   | 36   | 16   |
| Deaths | Western Europe               | Both | All Ages | All causes | 2019 | Number | Endocarditis and other cardiac infections       | KP | Drug-susceptible infection | 273  | 407  | 151  |
| Deaths | Western Europe               | Both | All Ages | All causes | 2019 | Number | Endocarditis and other cardiac infections       | KP | No infection               | 1109 | 1533 | 694  |
| Deaths | Southern Latin America       | Both | All Ages | All causes | 2019 | Number | Endocarditis and other cardiac infections       | KP | Drug-susceptible infection | 55   | 76   | 38   |
| Deaths | Southern Latin America       | Both | All Ages | All causes | 2019 | Number | Endocarditis and other cardiac infections       | KP | No infection               | 190  | 238  | 149  |
| Deaths | High-income North America    | Both | All Ages | All causes | 2019 | Number | Endocarditis and other cardiac infections       | KP | Drug-susceptible infection | 104  | 153  | 58   |
| Deaths | High-income North America    | Both | All Ages | All causes | 2019 | Number | Endocarditis and other cardiac infections       | KP | No infection               | 433  | 574  | 265  |
| Deaths | Caribbean                    | Both | All Ages | All causes | 2019 | Number | Endocarditis and other cardiac infections       | KP | Drug-susceptible infection | 13   | 19   | 8    |
| Deaths | Caribbean                    | Both | All Ages | All causes | 2019 | Number | Endocarditis and other cardiac infections       | KP | No infection               | 48   | 63   | 36   |
| Deaths | Andean Latin America         | Both | All Ages | All causes | 2019 | Number | Endocarditis and other cardiac infections       | KP | Drug-susceptible infection | 13   | 19   | 9    |
| Deaths | Andean Latin America         | Both | All Ages | All causes | 2019 | Number | Endocarditis and other cardiac infections       | KP | No infection               | 48   | 64   | 35   |
| Deaths | Central Latin America        | Both | All Ages | All causes | 2019 | Number | Endocarditis and other cardiac infections       | KP | Drug-susceptible infection | 46   | 70   | 30   |
| Deaths | Central Latin America        | Both | All Ages | All causes | 2019 | Number | Endocarditis and other cardiac infections       | KP | No infection               | 170  | 235  | 123  |
| Deaths | Tropical Latin America       | Both | All Ages | All causes | 2019 | Number | Endocarditis and other cardiac infections       | KP | Drug-susceptible infection | 103  | 139  | 72   |
| Deaths | Tropical Latin America       | Both | All Ages | All causes | 2019 | Number | Endocarditis and other cardiac infections       | KP | No infection               | 345  | 436  | 258  |
| Deaths | North Africa and Middle East | Both | All Ages | All causes | 2019 | Number | Endocarditis and other cardiac infections       | KP | Drug-susceptible infection | 151  | 228  | 98   |
| Deaths | North Africa and Middle East | Both | All Ages | All causes | 2019 | Number | Endocarditis and other cardiac infections       | KP | No infection               | 495  | 708  | 343  |
| Deaths | South Asia                   | Both | All Ages | All causes | 2019 | Number | Endocarditis and other cardiac infections       | KP | Drug-susceptible infection | 544  | 775  | 372  |
| Deaths | South Asia                   | Both | All Ages | All causes | 2019 | Number | Endocarditis and other cardiac infections       | KP | No infection               | 1539 | 2164 | 1088 |
| Deaths | Central Sub-Saharan Africa   | Both | All Ages | All causes | 2019 | Number | Endocarditis and other cardiac infections       | KP | Drug-susceptible infection | 24   | 40   | 13   |
| Deaths | Central Sub-Saharan Africa   | Both | All Ages | All causes | 2019 | Number | Endocarditis and other cardiac infections       | KP | No infection               | 93   | 141  | 60   |
| Deaths | Eastern Sub-Saharan Africa   | Both | All Ages | All causes | 2019 | Number | Endocarditis and other cardiac infections       | KP | Drug-susceptible infection | 78   | 130  | 46   |
| Deaths | Eastern Sub-Saharan Africa   | Both | All Ages | All causes | 2019 | Number | Endocarditis and other cardiac infections       | KP | No infection               | 292  | 434  | 196  |
| Deaths | Southern Sub-Saharan Africa  | Both | All Ages | All causes | 2019 | Number | Endocarditis and other cardiac infections       | KP | Drug-susceptible infection | 25   | 38   | 16   |
| Deaths | Southern Sub-Saharan Africa  | Both | All Ages | All causes | 2019 | Number | Endocarditis and other cardiac infections       | KP | No infection               | 90   | 125  | 66   |
| Deaths | Western Sub-Saharan Africa   | Both | All Ages | All causes | 2019 | Number | Endocarditis and other cardiac infections       | KP | Drug-susceptible infection | 88   | 130  | 58   |
| Deaths | Western Sub-Saharan Africa   | Both | All Ages | All causes | 2019 | Number | Endocarditis and other cardiac infections       | KP | No infection               | 325  | 439  | 246  |
| Deaths | Global                       | Both | All Ages | All causes | 2019 | Number | Infections of bones, joints, and related organs | KP | Drug-susceptible infection | 349  | 861  | 93   |
| Deaths | Global                       | Both | All Ages | All causes | 2019 | Number | Infections of bones, joints, and related organs | KP | No infection               | 1121 | 2664 | 312  |
| Deaths | East Asia                    | Both | All Ages | All causes | 2019 | Number | Infections of bones, joints, and related organs | KP | Drug-susceptible infection | 34   | 83   | 9    |
| Deaths | East Asia                    | Both | All Ages | All causes | 2019 | Number | Infections of bones, joints, and related organs | KP | No infection               | 123  | 289  | 37   |
| Deaths | Southeast Asia               | Both | All Ages | All causes | 2019 | Number | Infections of bones, joints, and related organs | KP | Drug-susceptible infection | 25   | 65   | 6    |
| Deaths | Southeast Asia               | Both | All Ages | All causes | 2019 | Number | Infections of bones, joints, and related organs | KP | No infection               | 80   | 195  | 22   |
| Deaths | Oceania                      | Both | All Ages | All causes | 2019 | Number | Infections of bones, joints, and related organs | KP | Drug-susceptible infection | 0    | 1    | 0    |
| Deaths | Oceania                      | Both | All Ages | All causes | 2019 | Number | Infections of bones, joints, and related organs | KP | No infection               | 2    | 5    | 0    |
| Deaths | Central Asia                 | Both | All Ages | All causes | 2019 | Number | Infections of bones, joints, and related organs | KP | Drug-susceptible infection | 2    | 6    | 1    |
| Deaths | Central Asia                 | Both | All Ages | All causes | 2019 | Number | Infections of bones, joints, and related organs | KP | No infection               | 8    | 20   | 2    |
| Deaths | Central Europe               | Both | All Ages | All causes | 2019 | Number | Infections of bones, joints, and related organs | KP | Drug-susceptible infection | 4    | 10   | 1    |
| Deaths | Central Europe               | Both | All Ages | All causes | 2019 | Number | Infections of bones, joints, and related organs | KP | No infection               | 14   | 34   | 4    |

|        |                              |      |          |            |      |        |                                                 |    |                            |        |        |        |
|--------|------------------------------|------|----------|------------|------|--------|-------------------------------------------------|----|----------------------------|--------|--------|--------|
| Deaths | Eastern Europe               | Both | All Ages | All causes | 2019 | Number | Infections of bones, joints, and related organs | KP | Drug-susceptible infection | 12     | 28     | 3      |
| Deaths | Eastern Europe               | Both | All Ages | All causes | 2019 | Number | Infections of bones, joints, and related organs | KP | No infection               | 36     | 85     | 10     |
| Deaths | High-income Asia Pacific     | Both | All Ages | All causes | 2019 | Number | Infections of bones, joints, and related organs | KP | Drug-susceptible infection | 2      | 4      | 1      |
| Deaths | High-income Asia Pacific     | Both | All Ages | All causes | 2019 | Number | Infections of bones, joints, and related organs | KP | No infection               | 8      | 19     | 3      |
| Deaths | Australasia                  | Both | All Ages | All causes | 2019 | Number | Infections of bones, joints, and related organs | KP | Drug-susceptible infection | 0      | 1      | 0      |
| Deaths | Australasia                  | Both | All Ages | All causes | 2019 | Number | Infections of bones, joints, and related organs | KP | No infection               | 1      | 3      | 0      |
| Deaths | Western Europe               | Both | All Ages | All causes | 2019 | Number | Infections of bones, joints, and related organs | KP | Drug-susceptible infection | 8      | 18     | 2      |
| Deaths | Western Europe               | Both | All Ages | All causes | 2019 | Number | Infections of bones, joints, and related organs | KP | No infection               | 32     | 71     | 10     |
| Deaths | Southern Latin America       | Both | All Ages | All causes | 2019 | Number | Infections of bones, joints, and related organs | KP | Drug-susceptible infection | 2      | 5      | 1      |
| Deaths | Southern Latin America       | Both | All Ages | All causes | 2019 | Number | Infections of bones, joints, and related organs | KP | No infection               | 7      | 16     | 2      |
| Deaths | High-income North America    | Both | All Ages | All causes | 2019 | Number | Infections of bones, joints, and related organs | KP | Drug-susceptible infection | 5      | 11     | 1      |
| Deaths | High-income North America    | Both | All Ages | All causes | 2019 | Number | Infections of bones, joints, and related organs | KP | No infection               | 19     | 43     | 6      |
| Deaths | Caribbean                    | Both | All Ages | All causes | 2019 | Number | Infections of bones, joints, and related organs | KP | Drug-susceptible infection | 2      | 6      | 1      |
| Deaths | Caribbean                    | Both | All Ages | All causes | 2019 | Number | Infections of bones, joints, and related organs | KP | No infection               | 8      | 20     | 2      |
| Deaths | Andean Latin America         | Both | All Ages | All causes | 2019 | Number | Infections of bones, joints, and related organs | KP | Drug-susceptible infection | 2      | 5      | 1      |
| Deaths | Andean Latin America         | Both | All Ages | All causes | 2019 | Number | Infections of bones, joints, and related organs | KP | No infection               | 7      | 17     | 2      |
| Deaths | Central Latin America        | Both | All Ages | All causes | 2019 | Number | Infections of bones, joints, and related organs | KP | Drug-susceptible infection | 7      | 19     | 2      |
| Deaths | Central Latin America        | Both | All Ages | All causes | 2019 | Number | Infections of bones, joints, and related organs | KP | No infection               | 27     | 65     | 8      |
| Deaths | Tropical Latin America       | Both | All Ages | All causes | 2019 | Number | Infections of bones, joints, and related organs | KP | Drug-susceptible infection | 8      | 20     | 2      |
| Deaths | Tropical Latin America       | Both | All Ages | All causes | 2019 | Number | Infections of bones, joints, and related organs | KP | No infection               | 27     | 65     | 7      |
| Deaths | North Africa and Middle East | Both | All Ages | All causes | 2019 | Number | Infections of bones, joints, and related organs | KP | Drug-susceptible infection | 30     | 76     | 7      |
| Deaths | North Africa and Middle East | Both | All Ages | All causes | 2019 | Number | Infections of bones, joints, and related organs | KP | No infection               | 101    | 244    | 25     |
| Deaths | South Asia                   | Both | All Ages | All causes | 2019 | Number | Infections of bones, joints, and related organs | KP | Drug-susceptible infection | 148    | 354    | 40     |
| Deaths | South Asia                   | Both | All Ages | All causes | 2019 | Number | Infections of bones, joints, and related organs | KP | No infection               | 409    | 968    | 108    |
| Deaths | Central Sub-Saharan Africa   | Both | All Ages | All causes | 2019 | Number | Infections of bones, joints, and related organs | KP | Drug-susceptible infection | 7      | 18     | 2      |
| Deaths | Central Sub-Saharan Africa   | Both | All Ages | All causes | 2019 | Number | Infections of bones, joints, and related organs | KP | No infection               | 26     | 65     | 7      |
| Deaths | Eastern Sub-Saharan Africa   | Both | All Ages | All causes | 2019 | Number | Infections of bones, joints, and related organs | KP | Drug-susceptible infection | 23     | 59     | 7      |
| Deaths | Eastern Sub-Saharan Africa   | Both | All Ages | All causes | 2019 | Number | Infections of bones, joints, and related organs | KP | No infection               | 83     | 191    | 23     |
| Deaths | Southern Sub-Saharan Africa  | Both | All Ages | All causes | 2019 | Number | Infections of bones, joints, and related organs | KP | Drug-susceptible infection | 5      | 13     | 1      |
| Deaths | Southern Sub-Saharan Africa  | Both | All Ages | All causes | 2019 | Number | Infections of bones, joints, and related organs | KP | No infection               | 17     | 40     | 5      |
| Deaths | Western Sub-Saharan Africa   | Both | All Ages | All causes | 2019 | Number | Infections of bones, joints, and related organs | KP | Drug-susceptible infection | 23     | 61     | 6      |
| Deaths | Western Sub-Saharan Africa   | Both | All Ages | All causes | 2019 | Number | Infections of bones, joints, and related organs | KP | No infection               | 84     | 199    | 22     |
| Deaths | Global                       | Both | All Ages | All causes | 2019 | Number | LRIs and all related infections in the thorax   | KP | Drug-susceptible infection | 69295  | 93725  | 50546  |
| Deaths | Global                       | Both | All Ages | All causes | 2019 | Number | LRIs and all related infections in the thorax   | KP | No infection               | 231776 | 288677 | 184551 |
| Deaths | East Asia                    | Both | All Ages | All causes | 2019 | Number | LRIs and all related infections in the thorax   | KP | Drug-susceptible infection | 3136   | 5373   | 1686   |
| Deaths | East Asia                    | Both | All Ages | All causes | 2019 | Number | LRIs and all related infections in the thorax   | KP | No infection               | 11392  | 16946  | 7485   |
| Deaths | Southeast Asia               | Both | All Ages | All causes | 2019 | Number | LRIs and all related infections in the thorax   | KP | Drug-susceptible infection | 4894   | 6764   | 3442   |
| Deaths | Southeast Asia               | Both | All Ages | All causes | 2019 | Number | LRIs and all related infections in the thorax   | KP | No infection               | 15923  | 20652  | 12363  |
| Deaths | Oceania                      | Both | All Ages | All causes | 2019 | Number | LRIs and all related infections in the thorax   | KP | Drug-susceptible infection | 219    | 341    | 126    |
| Deaths | Oceania                      | Both | All Ages | All causes | 2019 | Number | LRIs and all related infections in the thorax   | KP | No infection               | 793    | 1097   | 567    |
| Deaths | Central Asia                 | Both | All Ages | All causes | 2019 | Number | LRIs and all related infections in the thorax   | KP | Drug-susceptible infection | 602    | 862    | 394    |
| Deaths | Central Asia                 | Both | All Ages | All causes | 2019 | Number | LRIs and all related infections in the thorax   | KP | No infection               | 2218   | 2842   | 1738   |
| Deaths | Central Europe               | Both | All Ages | All causes | 2019 | Number | LRIs and all related infections in the thorax   | KP | Drug-susceptible infection | 603    | 855    | 416    |
| Deaths | Central Europe               | Both | All Ages | All causes | 2019 | Number | LRIs and all related infections in the thorax   | KP | No infection               | 2105   | 2825   | 1584   |
| Deaths | Eastern Europe               | Both | All Ages | All causes | 2019 | Number | LRIs and all related infections in the thorax   | KP | Drug-susceptible infection | 1375   | 1961   | 954    |
| Deaths | Eastern Europe               | Both | All Ages | All causes | 2019 | Number | LRIs and all related infections in the thorax   | KP | No infection               | 4080   | 5654   | 2966   |
| Deaths | High-income Asia Pacific     | Both | All Ages | All causes | 2019 | Number | LRIs and all related infections in the thorax   | KP | Drug-susceptible infection | 538    | 747    | 373    |
| Deaths | High-income Asia Pacific     | Both | All Ages | All causes | 2019 | Number | LRIs and all related infections in the thorax   | KP | No infection               | 2399   | 2843   | 1958   |

|        |                              |      |          |            |      |        |                                               |    |                            |       |       |       |
|--------|------------------------------|------|----------|------------|------|--------|-----------------------------------------------|----|----------------------------|-------|-------|-------|
| Deaths | Australasia                  | Both | All Ages | All causes | 2019 | Number | LRIs and all related infections in the thorax | KP | Drug-susceptible infection | 30    | 45    | 20    |
| Deaths | Australasia                  | Both | All Ages | All causes | 2019 | Number | LRIs and all related infections in the thorax | KP | No infection               | 143   | 195   | 105   |
| Deaths | Western Europe               | Both | All Ages | All causes | 2019 | Number | LRIs and all related infections in the thorax | KP | Drug-susceptible infection | 1278  | 1735  | 916   |
| Deaths | Western Europe               | Both | All Ages | All causes | 2019 | Number | LRIs and all related infections in the thorax | KP | No infection               | 5210  | 6445  | 4218  |
| Deaths | Southern Latin America       | Both | All Ages | All causes | 2019 | Number | LRIs and all related infections in the thorax | KP | Drug-susceptible infection | 725   | 959   | 532   |
| Deaths | Southern Latin America       | Both | All Ages | All causes | 2019 | Number | LRIs and all related infections in the thorax | KP | No infection               | 2512  | 2953  | 2130  |
| Deaths | High-income North America    | Both | All Ages | All causes | 2019 | Number | LRIs and all related infections in the thorax | KP | Drug-susceptible infection | 637   | 911   | 431   |
| Deaths | High-income North America    | Both | All Ages | All causes | 2019 | Number | LRIs and all related infections in the thorax | KP | No infection               | 2648  | 3559  | 1983  |
| Deaths | Caribbean                    | Both | All Ages | All causes | 2019 | Number | LRIs and all related infections in the thorax | KP | Drug-susceptible infection | 396   | 585   | 253   |
| Deaths | Caribbean                    | Both | All Ages | All causes | 2019 | Number | LRIs and all related infections in the thorax | KP | No infection               | 1508  | 1977  | 1125  |
| Deaths | Andean Latin America         | Both | All Ages | All causes | 2019 | Number | LRIs and all related infections in the thorax | KP | Drug-susceptible infection | 697   | 998   | 463   |
| Deaths | Andean Latin America         | Both | All Ages | All causes | 2019 | Number | LRIs and all related infections in the thorax | KP | No infection               | 2582  | 3306  | 2005  |
| Deaths | Central Latin America        | Both | All Ages | All causes | 2019 | Number | LRIs and all related infections in the thorax | KP | Drug-susceptible infection | 1178  | 1748  | 770   |
| Deaths | Central Latin America        | Both | All Ages | All causes | 2019 | Number | LRIs and all related infections in the thorax | KP | No infection               | 4401  | 5968  | 3215  |
| Deaths | Tropical Latin America       | Both | All Ages | All causes | 2019 | Number | LRIs and all related infections in the thorax | KP | Drug-susceptible infection | 2045  | 2690  | 1510  |
| Deaths | Tropical Latin America       | Both | All Ages | All causes | 2019 | Number | LRIs and all related infections in the thorax | KP | No infection               | 6864  | 8531  | 5565  |
| Deaths | North Africa and Middle East | Both | All Ages | All causes | 2019 | Number | LRIs and all related infections in the thorax | KP | Drug-susceptible infection | 3525  | 4927  | 2364  |
| Deaths | North Africa and Middle East | Both | All Ages | All causes | 2019 | Number | LRIs and all related infections in the thorax | KP | No infection               | 11900 | 15420 | 8994  |
| Deaths | South Asia                   | Both | All Ages | All causes | 2019 | Number | LRIs and all related infections in the thorax | KP | Drug-susceptible infection | 22914 | 30145 | 17042 |
| Deaths | South Asia                   | Both | All Ages | All causes | 2019 | Number | LRIs and all related infections in the thorax | KP | No infection               | 64980 | 84021 | 49662 |
| Deaths | Central Sub-Saharan Africa   | Both | All Ages | All causes | 2019 | Number | LRIs and all related infections in the thorax | KP | Drug-susceptible infection | 2558  | 3735  | 1613  |
| Deaths | Central Sub-Saharan Africa   | Both | All Ages | All causes | 2019 | Number | LRIs and all related infections in the thorax | KP | No infection               | 9840  | 12674 | 7550  |
| Deaths | Eastern Sub-Saharan Africa   | Both | All Ages | All causes | 2019 | Number | LRIs and all related infections in the thorax | KP | Drug-susceptible infection | 7759  | 10953 | 5228  |
| Deaths | Eastern Sub-Saharan Africa   | Both | All Ages | All causes | 2019 | Number | LRIs and all related infections in the thorax | KP | No infection               | 28847 | 36203 | 22932 |
| Deaths | Southern Sub-Saharan Africa  | Both | All Ages | All causes | 2019 | Number | LRIs and all related infections in the thorax | KP | Drug-susceptible infection | 1377  | 1956  | 923   |
| Deaths | Southern Sub-Saharan Africa  | Both | All Ages | All causes | 2019 | Number | LRIs and all related infections in the thorax | KP | No infection               | 5035  | 6167  | 4137  |
| Deaths | Western Sub-Saharan Africa   | Both | All Ages | All causes | 2019 | Number | LRIs and all related infections in the thorax | KP | Drug-susceptible infection | 12808 | 17752 | 8663  |
| Deaths | Western Sub-Saharan Africa   | Both | All Ages | All causes | 2019 | Number | LRIs and all related infections in the thorax | KP | No infection               | 46409 | 58151 | 36643 |
| Deaths | Global                       | Both | All Ages | All causes | 2019 | Number | Meningitis and other bacterial CNS infections | KP | Drug-susceptible infection | 8974  | 13636 | 5847  |
| Deaths | Global                       | Both | All Ages | All causes | 2019 | Number | Meningitis and other bacterial CNS infections | KP | No infection               | 30318 | 42755 | 21378 |
| Deaths | East Asia                    | Both | All Ages | All causes | 2019 | Number | Meningitis and other bacterial CNS infections | KP | Drug-susceptible infection | 235   | 482   | 114   |
| Deaths | East Asia                    | Both | All Ages | All causes | 2019 | Number | Meningitis and other bacterial CNS infections | KP | No infection               | 857   | 1669  | 484   |
| Deaths | Southeast Asia               | Both | All Ages | All causes | 2019 | Number | Meningitis and other bacterial CNS infections | KP | Drug-susceptible infection | 370   | 586   | 238   |
| Deaths | Southeast Asia               | Both | All Ages | All causes | 2019 | Number | Meningitis and other bacterial CNS infections | KP | No infection               | 1209  | 1829  | 832   |
| Deaths | Oceania                      | Both | All Ages | All causes | 2019 | Number | Meningitis and other bacterial CNS infections | KP | Drug-susceptible infection | 17    | 30    | 9     |
| Deaths | Oceania                      | Both | All Ages | All causes | 2019 | Number | Meningitis and other bacterial CNS infections | KP | No infection               | 62    | 98    | 38    |
| Deaths | Central Asia                 | Both | All Ages | All causes | 2019 | Number | Meningitis and other bacterial CNS infections | KP | Drug-susceptible infection | 26    | 49    | 15    |
| Deaths | Central Asia                 | Both | All Ages | All causes | 2019 | Number | Meningitis and other bacterial CNS infections | KP | No infection               | 98    | 171   | 62    |
| Deaths | Central Europe               | Both | All Ages | All causes | 2019 | Number | Meningitis and other bacterial CNS infections | KP | Drug-susceptible infection | 25    | 50    | 13    |
| Deaths | Central Europe               | Both | All Ages | All causes | 2019 | Number | Meningitis and other bacterial CNS infections | KP | No infection               | 86    | 172   | 47    |
| Deaths | Eastern Europe               | Both | All Ages | All causes | 2019 | Number | Meningitis and other bacterial CNS infections | KP | Drug-susceptible infection | 83    | 145   | 52    |
| Deaths | Eastern Europe               | Both | All Ages | All causes | 2019 | Number | Meningitis and other bacterial CNS infections | KP | No infection               | 253   | 438   | 165   |
| Deaths | High-income Asia Pacific     | Both | All Ages | All causes | 2019 | Number | Meningitis and other bacterial CNS infections | KP | Drug-susceptible infection | 7     | 14    | 4     |
| Deaths | High-income Asia Pacific     | Both | All Ages | All causes | 2019 | Number | Meningitis and other bacterial CNS infections | KP | No infection               | 30    | 59    | 18    |
| Deaths | Australasia                  | Both | All Ages | All causes | 2019 | Number | Meningitis and other bacterial CNS infections | KP | Drug-susceptible infection | 1     | 2     | 1     |
| Deaths | Australasia                  | Both | All Ages | All causes | 2019 | Number | Meningitis and other bacterial CNS infections | KP | No infection               | 5     | 10    | 3     |
| Deaths | Western Europe               | Both | All Ages | All causes | 2019 | Number | Meningitis and other bacterial CNS infections | KP | Drug-susceptible infection | 32    | 60    | 19    |
| Deaths | Western Europe               | Both | All Ages | All causes | 2019 | Number | Meningitis and other bacterial CNS infections | KP | No infection               | 130   | 236   | 84    |

|        |                              |      |          |            |      |        |                                               |    |                            |        |        |       |
|--------|------------------------------|------|----------|------------|------|--------|-----------------------------------------------|----|----------------------------|--------|--------|-------|
| Deaths | Southern Latin America       | Both | All Ages | All causes | 2019 | Number | Meningitis and other bacterial CNS infections | KP | Drug-susceptible infection | 17     | 27     | 11    |
| Deaths | Southern Latin America       | Both | All Ages | All causes | 2019 | Number | Meningitis and other bacterial CNS infections | KP | No infection               | 59     | 89     | 43    |
| Deaths | High-income North America    | Both | All Ages | All causes | 2019 | Number | Meningitis and other bacterial CNS infections | KP | Drug-susceptible infection | 18     | 34     | 11    |
| Deaths | High-income North America    | Both | All Ages | All causes | 2019 | Number | Meningitis and other bacterial CNS infections | KP | No infection               | 76     | 140    | 48    |
| Deaths | Caribbean                    | Both | All Ages | All causes | 2019 | Number | Meningitis and other bacterial CNS infections | KP | Drug-susceptible infection | 61     | 105    | 32    |
| Deaths | Caribbean                    | Both | All Ages | All causes | 2019 | Number | Meningitis and other bacterial CNS infections | KP | No infection               | 230    | 374    | 140   |
| Deaths | Andean Latin America         | Both | All Ages | All causes | 2019 | Number | Meningitis and other bacterial CNS infections | KP | Drug-susceptible infection | 16     | 28     | 9     |
| Deaths | Andean Latin America         | Both | All Ages | All causes | 2019 | Number | Meningitis and other bacterial CNS infections | KP | No infection               | 57     | 97     | 36    |
| Deaths | Central Latin America        | Both | All Ages | All causes | 2019 | Number | Meningitis and other bacterial CNS infections | KP | Drug-susceptible infection | 49     | 85     | 29    |
| Deaths | Central Latin America        | Both | All Ages | All causes | 2019 | Number | Meningitis and other bacterial CNS infections | KP | No infection               | 183    | 303    | 122   |
| Deaths | Tropical Latin America       | Both | All Ages | All causes | 2019 | Number | Meningitis and other bacterial CNS infections | KP | Drug-susceptible infection | 62     | 96     | 42    |
| Deaths | Tropical Latin America       | Both | All Ages | All causes | 2019 | Number | Meningitis and other bacterial CNS infections | KP | No infection               | 209    | 315    | 147   |
| Deaths | North Africa and Middle East | Both | All Ages | All causes | 2019 | Number | Meningitis and other bacterial CNS infections | KP | Drug-susceptible infection | 361    | 675    | 194   |
| Deaths | North Africa and Middle East | Both | All Ages | All causes | 2019 | Number | Meningitis and other bacterial CNS infections | KP | No infection               | 1228   | 2242   | 710   |
| Deaths | South Asia                   | Both | All Ages | All causes | 2019 | Number | Meningitis and other bacterial CNS infections | KP | Drug-susceptible infection | 2520   | 3666   | 1746  |
| Deaths | South Asia                   | Both | All Ages | All causes | 2019 | Number | Meningitis and other bacterial CNS infections | KP | No infection               | 7165   | 10283  | 5130  |
| Deaths | Central Sub-Saharan Africa   | Both | All Ages | All causes | 2019 | Number | Meningitis and other bacterial CNS infections | KP | Drug-susceptible infection | 287    | 461    | 165   |
| Deaths | Central Sub-Saharan Africa   | Both | All Ages | All causes | 2019 | Number | Meningitis and other bacterial CNS infections | KP | No infection               | 1107   | 1636   | 742   |
| Deaths | Eastern Sub-Saharan Africa   | Both | All Ages | All causes | 2019 | Number | Meningitis and other bacterial CNS infections | KP | Drug-susceptible infection | 1385   | 2112   | 846   |
| Deaths | Eastern Sub-Saharan Africa   | Both | All Ages | All causes | 2019 | Number | Meningitis and other bacterial CNS infections | KP | No infection               | 5039   | 6979   | 3593  |
| Deaths | Southern Sub-Saharan Africa  | Both | All Ages | All causes | 2019 | Number | Meningitis and other bacterial CNS infections | KP | Drug-susceptible infection | 116    | 170    | 72    |
| Deaths | Southern Sub-Saharan Africa  | Both | All Ages | All causes | 2019 | Number | Meningitis and other bacterial CNS infections | KP | No infection               | 424    | 568    | 314   |
| Deaths | Western Sub-Saharan Africa   | Both | All Ages | All causes | 2019 | Number | Meningitis and other bacterial CNS infections | KP | Drug-susceptible infection | 3286   | 5470   | 1846  |
| Deaths | Western Sub-Saharan Africa   | Both | All Ages | All causes | 2019 | Number | Meningitis and other bacterial CNS infections | KP | No infection               | 11809  | 17805  | 7646  |
| Deaths | Global                       | Both | All Ages | All causes | 2019 | Number | Peritoneal and intra-abdominal infections     | KP | Drug-susceptible infection | 37447  | 57239  | 23574 |
| Deaths | Global                       | Both | All Ages | All causes | 2019 | Number | Peritoneal and intra-abdominal infections     | KP | No infection               | 123158 | 182226 | 80452 |
| Deaths | East Asia                    | Both | All Ages | All causes | 2019 | Number | Peritoneal and intra-abdominal infections     | KP | Drug-susceptible infection | 3563   | 6605   | 1738  |
| Deaths | East Asia                    | Both | All Ages | All causes | 2019 | Number | Peritoneal and intra-abdominal infections     | KP | No infection               | 12969  | 21620  | 7371  |
| Deaths | Southeast Asia               | Both | All Ages | All causes | 2019 | Number | Peritoneal and intra-abdominal infections     | KP | Drug-susceptible infection | 4099   | 6271   | 2479  |
| Deaths | Southeast Asia               | Both | All Ages | All causes | 2019 | Number | Peritoneal and intra-abdominal infections     | KP | No infection               | 13441  | 19359  | 8799  |
| Deaths | Oceania                      | Both | All Ages | All causes | 2019 | Number | Peritoneal and intra-abdominal infections     | KP | Drug-susceptible infection | 28     | 51     | 13    |
| Deaths | Oceania                      | Both | All Ages | All causes | 2019 | Number | Peritoneal and intra-abdominal infections     | KP | No infection               | 100    | 176    | 55    |
| Deaths | Central Asia                 | Both | All Ages | All causes | 2019 | Number | Peritoneal and intra-abdominal infections     | KP | Drug-susceptible infection | 514    | 846    | 285   |
| Deaths | Central Asia                 | Both | All Ages | All causes | 2019 | Number | Peritoneal and intra-abdominal infections     | KP | No infection               | 1900   | 2857   | 1193  |
| Deaths | Central Europe               | Both | All Ages | All causes | 2019 | Number | Peritoneal and intra-abdominal infections     | KP | Drug-susceptible infection | 868    | 1339   | 519   |
| Deaths | Central Europe               | Both | All Ages | All causes | 2019 | Number | Peritoneal and intra-abdominal infections     | KP | No infection               | 3025   | 4496   | 1933  |
| Deaths | Eastern Europe               | Both | All Ages | All causes | 2019 | Number | Peritoneal and intra-abdominal infections     | KP | Drug-susceptible infection | 2153   | 3189   | 1374  |
| Deaths | Eastern Europe               | Both | All Ages | All causes | 2019 | Number | Peritoneal and intra-abdominal infections     | KP | No infection               | 6532   | 9470   | 4227  |
| Deaths | High-income Asia Pacific     | Both | All Ages | All causes | 2019 | Number | Peritoneal and intra-abdominal infections     | KP | Drug-susceptible infection | 399    | 652    | 219   |
| Deaths | High-income Asia Pacific     | Both | All Ages | All causes | 2019 | Number | Peritoneal and intra-abdominal infections     | KP | No infection               | 1725   | 2610   | 1068  |
| Deaths | Australasia                  | Both | All Ages | All causes | 2019 | Number | Peritoneal and intra-abdominal infections     | KP | Drug-susceptible infection | 39     | 62     | 22    |
| Deaths | Australasia                  | Both | All Ages | All causes | 2019 | Number | Peritoneal and intra-abdominal infections     | KP | No infection               | 185    | 285    | 116   |
| Deaths | Western Europe               | Both | All Ages | All causes | 2019 | Number | Peritoneal and intra-abdominal infections     | KP | Drug-susceptible infection | 1640   | 2480   | 987   |
| Deaths | Western Europe               | Both | All Ages | All causes | 2019 | Number | Peritoneal and intra-abdominal infections     | KP | No infection               | 6618   | 9614   | 4408  |
| Deaths | Southern Latin America       | Both | All Ages | All causes | 2019 | Number | Peritoneal and intra-abdominal infections     | KP | Drug-susceptible infection | 416    | 627    | 257   |
| Deaths | Southern Latin America       | Both | All Ages | All causes | 2019 | Number | Peritoneal and intra-abdominal infections     | KP | No infection               | 1451   | 2094   | 986   |
| Deaths | High-income North America    | Both | All Ages | All causes | 2019 | Number | Peritoneal and intra-abdominal infections     | KP | Drug-susceptible infection | 737    | 1126   | 440   |
| Deaths | High-income North America    | Both | All Ages | All causes | 2019 | Number | Peritoneal and intra-abdominal infections     | KP | No infection               | 3069   | 4486   | 2035  |

|        |                              |      |          |            |      |        |                                             |    |                            |       |       |       |
|--------|------------------------------|------|----------|------------|------|--------|---------------------------------------------|----|----------------------------|-------|-------|-------|
| Deaths | Caribbean                    | Both | All Ages | All causes | 2019 | Number | Peritoneal and intra-abdominal infections   | KP | Drug-susceptible infection | 242   | 402   | 134   |
| Deaths | Caribbean                    | Both | All Ages | All causes | 2019 | Number | Peritoneal and intra-abdominal infections   | KP | No infection               | 919   | 1406  | 578   |
| Deaths | Andean Latin America         | Both | All Ages | All causes | 2019 | Number | Peritoneal and intra-abdominal infections   | KP | Drug-susceptible infection | 389   | 607   | 231   |
| Deaths | Andean Latin America         | Both | All Ages | All causes | 2019 | Number | Peritoneal and intra-abdominal infections   | KP | No infection               | 1427  | 2121  | 918   |
| Deaths | Central Latin America        | Both | All Ages | All causes | 2019 | Number | Peritoneal and intra-abdominal infections   | KP | Drug-susceptible infection | 1358  | 2131  | 813   |
| Deaths | Central Latin America        | Both | All Ages | All causes | 2019 | Number | Peritoneal and intra-abdominal infections   | KP | No infection               | 5048  | 7291  | 3339  |
| Deaths | Tropical Latin America       | Both | All Ages | All causes | 2019 | Number | Peritoneal and intra-abdominal infections   | KP | Drug-susceptible infection | 1215  | 1794  | 785   |
| Deaths | Tropical Latin America       | Both | All Ages | All causes | 2019 | Number | Peritoneal and intra-abdominal infections   | KP | No infection               | 4080  | 5831  | 2805  |
| Deaths | North Africa and Middle East | Both | All Ages | All causes | 2019 | Number | Peritoneal and intra-abdominal infections   | KP | Drug-susceptible infection | 2765  | 4316  | 1631  |
| Deaths | North Africa and Middle East | Both | All Ages | All causes | 2019 | Number | Peritoneal and intra-abdominal infections   | KP | No infection               | 8533  | 12979 | 5218  |
| Deaths | South Asia                   | Both | All Ages | All causes | 2019 | Number | Peritoneal and intra-abdominal infections   | KP | Drug-susceptible infection | 11797 | 18456 | 7262  |
| Deaths | South Asia                   | Both | All Ages | All causes | 2019 | Number | Peritoneal and intra-abdominal infections   | KP | No infection               | 33011 | 50014 | 20782 |
| Deaths | Central Sub-Saharan Africa   | Both | All Ages | All causes | 2019 | Number | Peritoneal and intra-abdominal infections   | KP | Drug-susceptible infection | 559   | 956   | 292   |
| Deaths | Central Sub-Saharan Africa   | Both | All Ages | All causes | 2019 | Number | Peritoneal and intra-abdominal infections   | KP | No infection               | 2150  | 3464  | 1285  |
| Deaths | Eastern Sub-Saharan Africa   | Both | All Ages | All causes | 2019 | Number | Peritoneal and intra-abdominal infections   | KP | Drug-susceptible infection | 2094  | 3387  | 1181  |
| Deaths | Eastern Sub-Saharan Africa   | Both | All Ages | All causes | 2019 | Number | Peritoneal and intra-abdominal infections   | KP | No infection               | 7658  | 11404 | 4920  |
| Deaths | Southern Sub-Saharan Africa  | Both | All Ages | All causes | 2019 | Number | Peritoneal and intra-abdominal infections   | KP | Drug-susceptible infection | 347   | 568   | 194   |
| Deaths | Southern Sub-Saharan Africa  | Both | All Ages | All causes | 2019 | Number | Peritoneal and intra-abdominal infections   | KP | No infection               | 1259  | 1901  | 819   |
| Deaths | Western Sub-Saharan Africa   | Both | All Ages | All causes | 2019 | Number | Peritoneal and intra-abdominal infections   | KP | Drug-susceptible infection | 2227  | 3685  | 1173  |
| Deaths | Western Sub-Saharan Africa   | Both | All Ages | All causes | 2019 | Number | Peritoneal and intra-abdominal infections   | KP | No infection               | 8068  | 12542 | 4845  |
| Deaths | Global                       | Both | All Ages | All causes | 2019 | Number | Urinary tract infections and pyelonephritis | KP | Drug-susceptible infection | 8334  | 12475 | 5477  |
| Deaths | Global                       | Both | All Ages | All causes | 2019 | Number | Urinary tract infections and pyelonephritis | KP | No infection               | 27682 | 40307 | 19015 |
| Deaths | East Asia                    | Both | All Ages | All causes | 2019 | Number | Urinary tract infections and pyelonephritis | KP | Drug-susceptible infection | 1011  | 2099  | 408   |
| Deaths | East Asia                    | Both | All Ages | All causes | 2019 | Number | Urinary tract infections and pyelonephritis | KP | No infection               | 3659  | 6958  | 1681  |
| Deaths | Southeast Asia               | Both | All Ages | All causes | 2019 | Number | Urinary tract infections and pyelonephritis | KP | Drug-susceptible infection | 739   | 1184  | 428   |
| Deaths | Southeast Asia               | Both | All Ages | All causes | 2019 | Number | Urinary tract infections and pyelonephritis | KP | No infection               | 2433  | 3691  | 1517  |
| Deaths | Oceania                      | Both | All Ages | All causes | 2019 | Number | Urinary tract infections and pyelonephritis | KP | Drug-susceptible infection | 8     | 14    | 4     |
| Deaths | Oceania                      | Both | All Ages | All causes | 2019 | Number | Urinary tract infections and pyelonephritis | KP | No infection               | 28    | 45    | 15    |
| Deaths | Central Asia                 | Both | All Ages | All causes | 2019 | Number | Urinary tract infections and pyelonephritis | KP | Drug-susceptible infection | 127   | 201   | 75    |
| Deaths | Central Asia                 | Both | All Ages | All causes | 2019 | Number | Urinary tract infections and pyelonephritis | KP | No infection               | 467   | 687   | 319   |
| Deaths | Central Europe               | Both | All Ages | All causes | 2019 | Number | Urinary tract infections and pyelonephritis | KP | Drug-susceptible infection | 242   | 408   | 131   |
| Deaths | Central Europe               | Both | All Ages | All causes | 2019 | Number | Urinary tract infections and pyelonephritis | KP | No infection               | 851   | 1386  | 501   |
| Deaths | Eastern Europe               | Both | All Ages | All causes | 2019 | Number | Urinary tract infections and pyelonephritis | KP | Drug-susceptible infection | 656   | 1005  | 418   |
| Deaths | Eastern Europe               | Both | All Ages | All causes | 2019 | Number | Urinary tract infections and pyelonephritis | KP | No infection               | 1967  | 2942  | 1298  |
| Deaths | High-income Asia Pacific     | Both | All Ages | All causes | 2019 | Number | Urinary tract infections and pyelonephritis | KP | Drug-susceptible infection | 130   | 200   | 80    |
| Deaths | High-income Asia Pacific     | Both | All Ages | All causes | 2019 | Number | Urinary tract infections and pyelonephritis | KP | No infection               | 573   | 815   | 406   |
| Deaths | Australasia                  | Both | All Ages | All causes | 2019 | Number | Urinary tract infections and pyelonephritis | KP | Drug-susceptible infection | 17    | 26    | 11    |
| Deaths | Australasia                  | Both | All Ages | All causes | 2019 | Number | Urinary tract infections and pyelonephritis | KP | No infection               | 81    | 112   | 58    |
| Deaths | Western Europe               | Both | All Ages | All causes | 2019 | Number | Urinary tract infections and pyelonephritis | KP | Drug-susceptible infection | 652   | 923   | 440   |
| Deaths | Western Europe               | Both | All Ages | All causes | 2019 | Number | Urinary tract infections and pyelonephritis | KP | No infection               | 2681  | 3589  | 2001  |
| Deaths | Southern Latin America       | Both | All Ages | All causes | 2019 | Number | Urinary tract infections and pyelonephritis | KP | Drug-susceptible infection | 185   | 261   | 122   |
| Deaths | Southern Latin America       | Both | All Ages | All causes | 2019 | Number | Urinary tract infections and pyelonephritis | KP | No infection               | 645   | 832   | 473   |
| Deaths | High-income North America    | Both | All Ages | All causes | 2019 | Number | Urinary tract infections and pyelonephritis | KP | Drug-susceptible infection | 312   | 448   | 213   |
| Deaths | High-income North America    | Both | All Ages | All causes | 2019 | Number | Urinary tract infections and pyelonephritis | KP | No infection               | 1299  | 1741  | 997   |
| Deaths | Caribbean                    | Both | All Ages | All causes | 2019 | Number | Urinary tract infections and pyelonephritis | KP | Drug-susceptible infection | 49    | 79    | 29    |
| Deaths | Caribbean                    | Both | All Ages | All causes | 2019 | Number | Urinary tract infections and pyelonephritis | KP | No infection               | 183   | 259   | 127   |
| Deaths | Andean Latin America         | Both | All Ages | All causes | 2019 | Number | Urinary tract infections and pyelonephritis | KP | Drug-susceptible infection | 77    | 121   | 46    |
| Deaths | Andean Latin America         | Both | All Ages | All causes | 2019 | Number | Urinary tract infections and pyelonephritis | KP | No infection               | 285   | 408   | 189   |



|        |                              |      |          |            |      |        |                                             |    |                            |      |      |      |
|--------|------------------------------|------|----------|------------|------|--------|---------------------------------------------|----|----------------------------|------|------|------|
| Deaths | Central Latin America        | Both | All Ages | All causes | 2019 | Number | Urinary tract infections and pyelonephritis | KP | Drug-susceptible infection | 309  | 492  | 191  |
| Deaths | Central Latin America        | Both | All Ages | All causes | 2019 | Number | Urinary tract infections and pyelonephritis | KP | No infection               | 1144 | 1650 | 784  |
| Deaths | Tropical Latin America       | Both | All Ages | All causes | 2019 | Number | Urinary tract infections and pyelonephritis | KP | Drug-susceptible infection | 556  | 734  | 381  |
| Deaths | Tropical Latin America       | Both | All Ages | All causes | 2019 | Number | Urinary tract infections and pyelonephritis | KP | No infection               | 1864 | 2347 | 1365 |
| Deaths | North Africa and Middle East | Both | All Ages | All causes | 2019 | Number | Urinary tract infections and pyelonephritis | KP | Drug-susceptible infection | 379  | 686  | 184  |
| Deaths | North Africa and Middle East | Both | All Ages | All causes | 2019 | Number | Urinary tract infections and pyelonephritis | KP | No infection               | 1223 | 2107 | 611  |
| Deaths | South Asia                   | Both | All Ages | All causes | 2019 | Number | Urinary tract infections and pyelonephritis | KP | Drug-susceptible infection | 2568 | 3604 | 1777 |
| Deaths | South Asia                   | Both | All Ages | All causes | 2019 | Number | Urinary tract infections and pyelonephritis | KP | No infection               | 7129 | 9867 | 5106 |
| Deaths | Central Sub-Saharan Africa   | Both | All Ages | All causes | 2019 | Number | Urinary tract infections and pyelonephritis | KP | Drug-susceptible infection | 33   | 55   | 17   |
| Deaths | Central Sub-Saharan Africa   | Both | All Ages | All causes | 2019 | Number | Urinary tract infections and pyelonephritis | KP | No infection               | 127  | 195  | 73   |
| Deaths | Eastern Sub-Saharan Africa   | Both | All Ages | All causes | 2019 | Number | Urinary tract infections and pyelonephritis | KP | Drug-susceptible infection | 118  | 187  | 64   |
| Deaths | Eastern Sub-Saharan Africa   | Both | All Ages | All causes | 2019 | Number | Urinary tract infections and pyelonephritis | KP | No infection               | 433  | 642  | 233  |
| Deaths | Southern Sub-Saharan Africa  | Both | All Ages | All causes | 2019 | Number | Urinary tract infections and pyelonephritis | KP | Drug-susceptible infection | 37   | 63   | 19   |
| Deaths | Southern Sub-Saharan Africa  | Both | All Ages | All causes | 2019 | Number | Urinary tract infections and pyelonephritis | KP | No infection               | 134  | 213  | 75   |
| Deaths | Western Sub-Saharan Africa   | Both | All Ages | All causes | 2019 | Number | Urinary tract infections and pyelonephritis | KP | Drug-susceptible infection | 130  | 204  | 76   |
| Deaths | Western Sub-Saharan Africa   | Both | All Ages | All causes | 2019 | Number | Urinary tract infections and pyelonephritis | KP | No infection               | 477  | 687  | 302  |

**S.Figure 2 Regional mortality rates in all ages associated with and attributable to *Klebsiella pneumoniae* antimicrobial resistance by infectious syndrome, 2019**

| measure | location       | sex  | age      | cause      | year | metric | infectious syndrome                                       | pathogen | counterfactual             | value<br>(per 100,000) | upper<br>(per 100,000) | lower<br>(per 100,000) |
|---------|----------------|------|----------|------------|------|--------|-----------------------------------------------------------|----------|----------------------------|------------------------|------------------------|------------------------|
| Deaths  | Global         | Both | All Ages | All causes | 2019 | Rate   | All infectious syndromes                                  | KP       | Drug-susceptible infection | 2.490                  | 3.520                  | 1.680                  |
| Deaths  | Global         | Both | All Ages | All causes | 2019 | Rate   | All infectious syndromes                                  | KP       | No infection               | 8.290                  | 11.157                 | 6.010                  |
| Deaths  | Global         | Both | All Ages | All causes | 2019 | Rate   | Bacterial infections of the skin and subcutaneous systems | KP       | Drug-susceptible infection | 0.021                  | 0.077                  | 0.003                  |
| Deaths  | Global         | Both | All Ages | All causes | 2019 | Rate   | Bacterial infections of the skin and subcutaneous systems | KP       | No infection               | 0.069                  | 0.256                  | 0.010                  |
| Deaths  | Global         | Both | All Ages | All causes | 2019 | Rate   | Bloodstream infections                                    | KP       | Drug-susceptible infection | 0.831                  | 1.350                  | 0.467                  |
| Deaths  | Global         | Both | All Ages | All causes | 2019 | Rate   | Bloodstream infections                                    | KP       | No infection               | 2.770                  | 4.330                  | 1.660                  |
| Deaths  | Global         | Both | All Ages | All causes | 2019 | Rate   | Endocarditis and other cardiac infections                 | KP       | Drug-susceptible infection | 0.029                  | 0.043                  | 0.020                  |
| Deaths  | Global         | Both | All Ages | All causes | 2019 | Rate   | Endocarditis and other cardiac infections                 | KP       | No infection               | 0.101                  | 0.140                  | 0.074                  |
| Deaths  | Global         | Both | All Ages | All causes | 2019 | Rate   | Infections of bones, joints, and related organs           | KP       | Drug-susceptible infection | 0.005                  | 0.011                  | 0.001                  |
| Deaths  | Global         | Both | All Ages | All causes | 2019 | Rate   | Infections of bones, joints, and related organs           | KP       | No infection               | 0.015                  | 0.034                  | 0.004                  |
| Deaths  | Global         | Both | All Ages | All causes | 2019 | Rate   | LRIs and all related infections in the thorax             | KP       | Drug-susceptible infection | 0.896                  | 1.210                  | 0.653                  |
| Deaths  | Global         | Both | All Ages | All causes | 2019 | Rate   | LRIs and all related infections in the thorax             | KP       | No infection               | 3.000                  | 3.730                  | 2.390                  |
| Deaths  | Global         | Both | All Ages | All causes | 2019 | Rate   | Meningitis and other bacterial CNS infections             | KP       | Drug-susceptible infection | 0.116                  | 0.176                  | 0.076                  |
| Deaths  | Global         | Both | All Ages | All causes | 2019 | Rate   | Meningitis and other bacterial CNS infections             | KP       | No infection               | 0.392                  | 0.553                  | 0.276                  |
| Deaths  | Global         | Both | All Ages | All causes | 2019 | Rate   | Peritoneal and intra-abdominal infections                 | KP       | Drug-susceptible infection | 0.484                  | 0.740                  | 0.305                  |
| Deaths  | Global         | Both | All Ages | All causes | 2019 | Rate   | Peritoneal and intra-abdominal infections                 | KP       | No infection               | 1.590                  | 2.360                  | 1.040                  |
| Deaths  | Global         | Both | All Ages | All causes | 2019 | Rate   | Urinary tract infections and pyelonephritis               | KP       | Drug-susceptible infection | 0.108                  | 0.161                  | 0.071                  |
| Deaths  | Global         | Both | All Ages | All causes | 2019 | Rate   | Urinary tract infections and pyelonephritis               | KP       | No infection               | 0.358                  | 0.521                  | 0.246                  |
| Deaths  | East Asia      | Both | All Ages | All causes | 2019 | Rate   | All infectious syndromes                                  | KP       | Drug-susceptible infection | 0.984                  | 1.720                  | 0.497                  |
| Deaths  | East Asia      | Both | All Ages | All causes | 2019 | Rate   | All infectious syndromes                                  | KP       | No infection               | 3.580                  | 5.550                  | 2.150                  |
| Deaths  | East Asia      | Both | All Ages | All causes | 2019 | Rate   | Bacterial infections of the skin and subcutaneous systems | KP       | Drug-susceptible infection | 0.015                  | 0.055                  | 0.002                  |
| Deaths  | East Asia      | Both | All Ages | All causes | 2019 | Rate   | Bacterial infections of the skin and subcutaneous systems | KP       | No infection               | 0.054                  | 0.199                  | 0.007                  |
| Deaths  | East Asia      | Both | All Ages | All causes | 2019 | Rate   | Bloodstream infections                                    | KP       | Drug-susceptible infection | 0.415                  | 0.797                  | 0.188                  |
| Deaths  | East Asia      | Both | All Ages | All causes | 2019 | Rate   | Bloodstream infections                                    | KP       | No infection               | 1.510                  | 2.580                  | 0.814                  |
| Deaths  | East Asia      | Both | All Ages | All causes | 2019 | Rate   | Endocarditis and other cardiac infections                 | KP       | Drug-susceptible infection | 0.012                  | 0.023                  | 0.006                  |
| Deaths  | East Asia      | Both | All Ages | All causes | 2019 | Rate   | Endocarditis and other cardiac infections                 | KP       | No infection               | 0.045                  | 0.075                  | 0.025                  |
| Deaths  | East Asia      | Both | All Ages | All causes | 2019 | Rate   | Infections of bones, joints, and related organs           | KP       | Drug-susceptible infection | 0.002                  | 0.006                  | 0.001                  |
| Deaths  | East Asia      | Both | All Ages | All causes | 2019 | Rate   | Infections of bones, joints, and related organs           | KP       | No infection               | 0.008                  | 0.020                  | 0.002                  |
| Deaths  | East Asia      | Both | All Ages | All causes | 2019 | Rate   | LRIs and all related infections in the thorax             | KP       | Drug-susceptible infection | 0.213                  | 0.365                  | 0.115                  |
| Deaths  | East Asia      | Both | All Ages | All causes | 2019 | Rate   | LRIs and all related infections in the thorax             | KP       | No infection               | 0.774                  | 1.150                  | 0.508                  |
| Deaths  | East Asia      | Both | All Ages | All causes | 2019 | Rate   | Meningitis and other bacterial CNS infections             | KP       | Drug-susceptible infection | 0.016                  | 0.033                  | 0.008                  |
| Deaths  | East Asia      | Both | All Ages | All causes | 2019 | Rate   | Meningitis and other bacterial CNS infections             | KP       | No infection               | 0.058                  | 0.113                  | 0.033                  |
| Deaths  | East Asia      | Both | All Ages | All causes | 2019 | Rate   | Peritoneal and intra-abdominal infections                 | KP       | Drug-susceptible infection | 0.242                  | 0.449                  | 0.118                  |
| Deaths  | East Asia      | Both | All Ages | All causes | 2019 | Rate   | Peritoneal and intra-abdominal infections                 | KP       | No infection               | 0.881                  | 1.470                  | 0.501                  |
| Deaths  | East Asia      | Both | All Ages | All causes | 2019 | Rate   | Urinary tract infections and pyelonephritis               | KP       | Drug-susceptible infection | 0.069                  | 0.143                  | 0.028                  |
| Deaths  | East Asia      | Both | All Ages | All causes | 2019 | Rate   | Urinary tract infections and pyelonephritis               | KP       | No infection               | 0.249                  | 0.473                  | 0.114                  |
| Deaths  | Southeast Asia | Both | All Ages | All causes | 2019 | Rate   | All infectious syndromes                                  | KP       | Drug-susceptible infection | 2.260                  | 3.300                  | 1.460                  |
| Deaths  | Southeast Asia | Both | All Ages | All causes | 2019 | Rate   | All infectious syndromes                                  | KP       | No infection               | 7.370                  | 10.229                 | 5.140                  |
| Deaths  | Southeast Asia | Both | All Ages | All causes | 2019 | Rate   | Bacterial infections of the skin and subcutaneous systems | KP       | Drug-susceptible infection | 0.025                  | 0.091                  | 0.004                  |
| Deaths  | Southeast Asia | Both | All Ages | All causes | 2019 | Rate   | Bacterial infections of the skin and subcutaneous systems | KP       | No infection               | 0.082                  | 0.302                  | 0.012                  |
| Deaths  | Southeast Asia | Both | All Ages | All causes | 2019 | Rate   | Bloodstream infections                                    | KP       | Drug-susceptible infection | 0.706                  | 1.190                  | 0.380                  |
| Deaths  | Southeast Asia | Both | All Ages | All causes | 2019 | Rate   | Bloodstream infections                                    | KP       | No infection               | 2.280                  | 3.700                  | 1.320                  |
| Deaths  | Southeast Asia | Both | All Ages | All causes | 2019 | Rate   | Endocarditis and other cardiac infections                 | KP       | Drug-susceptible infection | 0.028                  | 0.041                  | 0.020                  |

|        |                |      |          |            |      |      |                                                           |    |                            |        |        |       |
|--------|----------------|------|----------|------------|------|------|-----------------------------------------------------------|----|----------------------------|--------|--------|-------|
| Deaths | Southeast Asia | Both | All Ages | All causes | 2019 | Rate | Endocarditis and other cardiac infections                 | KP | No infection               | 0.093  | 0.124  | 0.070 |
| Deaths | Southeast Asia | Both | All Ages | All causes | 2019 | Rate | Infections of bones, joints, and related organs           | KP | Drug-susceptible infection | 0.004  | 0.010  | 0.001 |
| Deaths | Southeast Asia | Both | All Ages | All causes | 2019 | Rate | Infections of bones, joints, and related organs           | KP | No infection               | 0.012  | 0.029  | 0.003 |
| Deaths | Southeast Asia | Both | All Ages | All causes | 2019 | Rate | LRIs and all related infections in the thorax             | KP | Drug-susceptible infection | 0.726  | 1.000  | 0.511 |
| Deaths | Southeast Asia | Both | All Ages | All causes | 2019 | Rate | LRIs and all related infections in the thorax             | KP | No infection               | 2.360  | 3.070  | 1.830 |
| Deaths | Southeast Asia | Both | All Ages | All causes | 2019 | Rate | Meningitis and other bacterial CNS infections             | KP | Drug-susceptible infection | 0.055  | 0.087  | 0.035 |
| Deaths | Southeast Asia | Both | All Ages | All causes | 2019 | Rate | Meningitis and other bacterial CNS infections             | KP | No infection               | 0.179  | 0.271  | 0.123 |
| Deaths | Southeast Asia | Both | All Ages | All causes | 2019 | Rate | Peritoneal and intra-abdominal infections                 | KP | Drug-susceptible infection | 0.608  | 0.931  | 0.368 |
| Deaths | Southeast Asia | Both | All Ages | All causes | 2019 | Rate | Peritoneal and intra-abdominal infections                 | KP | No infection               | 1.990  | 2.870  | 1.310 |
| Deaths | Southeast Asia | Both | All Ages | All causes | 2019 | Rate | Urinary tract infections and pyelonephritis               | KP | Drug-susceptible infection | 0.110  | 0.176  | 0.064 |
| Deaths | Southeast Asia | Both | All Ages | All causes | 2019 | Rate | Urinary tract infections and pyelonephritis               | KP | No infection               | 0.361  | 0.548  | 0.225 |
| Deaths | Oceania        | Both | All Ages | All causes | 2019 | Rate | All infectious syndromes                                  | KP | Drug-susceptible infection | 2.970  | 4.600  | 1.680 |
| Deaths | Oceania        | Both | All Ages | All causes | 2019 | Rate | All infectious syndromes                                  | KP | No infection               | 10.736 | 14.919 | 7.450 |
| Deaths | Oceania        | Both | All Ages | All causes | 2019 | Rate | Bacterial infections of the skin and subcutaneous systems | KP | Drug-susceptible infection | 0.018  | 0.069  | 0.002 |
| Deaths | Oceania        | Both | All Ages | All causes | 2019 | Rate | Bacterial infections of the skin and subcutaneous systems | KP | No infection               | 0.065  | 0.270  | 0.007 |
| Deaths | Oceania        | Both | All Ages | All causes | 2019 | Rate | Bloodstream infections                                    | KP | Drug-susceptible infection | 0.874  | 1.540  | 0.439 |
| Deaths | Oceania        | Both | All Ages | All causes | 2019 | Rate | Bloodstream infections                                    | KP | No infection               | 3.160  | 4.970  | 1.830 |
| Deaths | Oceania        | Both | All Ages | All causes | 2019 | Rate | Endocarditis and other cardiac infections                 | KP | Drug-susceptible infection | 0.026  | 0.041  | 0.016 |
| Deaths | Oceania        | Both | All Ages | All causes | 2019 | Rate | Endocarditis and other cardiac infections                 | KP | No infection               | 0.095  | 0.134  | 0.067 |
| Deaths | Oceania        | Both | All Ages | All causes | 2019 | Rate | Infections of bones, joints, and related organs           | KP | Drug-susceptible infection | 0.004  | 0.010  | 0.001 |
| Deaths | Oceania        | Both | All Ages | All causes | 2019 | Rate | Infections of bones, joints, and related organs           | KP | No infection               | 0.013  | 0.035  | 0.003 |
| Deaths | Oceania        | Both | All Ages | All causes | 2019 | Rate | LRIs and all related infections in the thorax             | KP | Drug-susceptible infection | 1.650  | 2.570  | 0.949 |
| Deaths | Oceania        | Both | All Ages | All causes | 2019 | Rate | LRIs and all related infections in the thorax             | KP | No infection               | 5.970  | 8.260  | 4.270 |
| Deaths | Oceania        | Both | All Ages | All causes | 2019 | Rate | Meningitis and other bacterial CNS infections             | KP | Drug-susceptible infection | 0.130  | 0.227  | 0.068 |
| Deaths | Oceania        | Both | All Ages | All causes | 2019 | Rate | Meningitis and other bacterial CNS infections             | KP | No infection               | 0.470  | 0.738  | 0.285 |
| Deaths | Oceania        | Both | All Ages | All causes | 2019 | Rate | Peritoneal and intra-abdominal infections                 | KP | Drug-susceptible infection | 0.208  | 0.386  | 0.102 |
| Deaths | Oceania        | Both | All Ages | All causes | 2019 | Rate | Peritoneal and intra-abdominal infections                 | KP | No infection               | 0.750  | 1.320  | 0.415 |
| Deaths | Oceania        | Both | All Ages | All causes | 2019 | Rate | Urinary tract infections and pyelonephritis               | KP | Drug-susceptible infection | 0.057  | 0.102  | 0.028 |
| Deaths | Oceania        | Both | All Ages | All causes | 2019 | Rate | Urinary tract infections and pyelonephritis               | KP | No infection               | 0.207  | 0.337  | 0.112 |
| Deaths | Central Asia   | Both | All Ages | All causes | 2019 | Rate | All infectious syndromes                                  | KP | Drug-susceptible infection | 2.180  | 3.410  | 1.280 |
| Deaths | Central Asia   | Both | All Ages | All causes | 2019 | Rate | All infectious syndromes                                  | KP | No infection               | 8.040  | 11.476 | 5.480 |
| Deaths | Central Asia   | Both | All Ages | All causes | 2019 | Rate | Bacterial infections of the skin and subcutaneous systems | KP | Drug-susceptible infection | 0.014  | 0.052  | 0.001 |
| Deaths | Central Asia   | Both | All Ages | All causes | 2019 | Rate | Bacterial infections of the skin and subcutaneous systems | KP | No infection               | 0.050  | 0.195  | 0.005 |
| Deaths | Central Asia   | Both | All Ages | All causes | 2019 | Rate | Bloodstream infections                                    | KP | Drug-susceptible infection | 0.785  | 1.410  | 0.399 |
| Deaths | Central Asia   | Both | All Ages | All causes | 2019 | Rate | Bloodstream infections                                    | KP | No infection               | 2.900  | 4.860  | 1.620 |
| Deaths | Central Asia   | Both | All Ages | All causes | 2019 | Rate | Endocarditis and other cardiac infections                 | KP | Drug-susceptible infection | 0.022  | 0.038  | 0.012 |
| Deaths | Central Asia   | Both | All Ages | All causes | 2019 | Rate | Endocarditis and other cardiac infections                 | KP | No infection               | 0.081  | 0.131  | 0.048 |
| Deaths | Central Asia   | Both | All Ages | All causes | 2019 | Rate | Infections of bones, joints, and related organs           | KP | Drug-susceptible infection | 0.002  | 0.006  | 0.001 |
| Deaths | Central Asia   | Both | All Ages | All causes | 2019 | Rate | Infections of bones, joints, and related organs           | KP | No infection               | 0.008  | 0.021  | 0.002 |
| Deaths | Central Asia   | Both | All Ages | All causes | 2019 | Rate | LRIs and all related infections in the thorax             | KP | Drug-susceptible infection | 0.644  | 0.922  | 0.421 |
| Deaths | Central Asia   | Both | All Ages | All causes | 2019 | Rate | LRIs and all related infections in the thorax             | KP | No infection               | 2.370  | 3.040  | 1.860 |
| Deaths | Central Asia   | Both | All Ages | All causes | 2019 | Rate | Meningitis and other bacterial CNS infections             | KP | Drug-susceptible infection | 0.028  | 0.052  | 0.016 |
| Deaths | Central Asia   | Both | All Ages | All causes | 2019 | Rate | Meningitis and other bacterial CNS infections             | KP | No infection               | 0.104  | 0.183  | 0.066 |
| Deaths | Central Asia   | Both | All Ages | All causes | 2019 | Rate | Peritoneal and intra-abdominal infections                 | KP | Drug-susceptible infection | 0.549  | 0.905  | 0.304 |
| Deaths | Central Asia   | Both | All Ages | All causes | 2019 | Rate | Peritoneal and intra-abdominal infections                 | KP | No infection               | 2.030  | 3.050  | 1.280 |
| Deaths | Central Asia   | Both | All Ages | All causes | 2019 | Rate | Urinary tract infections and pyelonephritis               | KP | Drug-susceptible infection | 0.136  | 0.215  | 0.081 |
| Deaths | Central Asia   | Both | All Ages | All causes | 2019 | Rate | Urinary tract infections and pyelonephritis               | KP | No infection               | 0.499  | 0.735  | 0.341 |

|        |                          |      |          |            |      |      |                                                           |    |                            |        |        |       |
|--------|--------------------------|------|----------|------------|------|------|-----------------------------------------------------------|----|----------------------------|--------|--------|-------|
| Deaths | Central Europe           | Both | All Ages | All causes | 2019 | Rate | All infectious syndromes                                  | KP | Drug-susceptible infection | 2.750  | 4.290  | 1.650 |
| Deaths | Central Europe           | Both | All Ages | All causes | 2019 | Rate | All infectious syndromes                                  | KP | No infection               | 9.590  | 14.394 | 6.170 |
| Deaths | Central Europe           | Both | All Ages | All causes | 2019 | Rate | Bacterial infections of the skin and subcutaneous systems | KP | Drug-susceptible infection | 0.027  | 0.103  | 0.003 |
| Deaths | Central Europe           | Both | All Ages | All causes | 2019 | Rate | Bacterial infections of the skin and subcutaneous systems | KP | No infection               | 0.094  | 0.349  | 0.012 |
| Deaths | Central Europe           | Both | All Ages | All causes | 2019 | Rate | Bloodstream infections                                    | KP | Drug-susceptible infection | 1.090  | 1.940  | 0.525 |
| Deaths | Central Europe           | Both | All Ages | All causes | 2019 | Rate | Bloodstream infections                                    | KP | No infection               | 3.780  | 6.520  | 2.000 |
| Deaths | Central Europe           | Both | All Ages | All causes | 2019 | Rate | Endocarditis and other cardiac infections                 | KP | Drug-susceptible infection | 0.111  | 0.200  | 0.057 |
| Deaths | Central Europe           | Both | All Ages | All causes | 2019 | Rate | Endocarditis and other cardiac infections                 | KP | No infection               | 0.391  | 0.648  | 0.214 |
| Deaths | Central Europe           | Both | All Ages | All causes | 2019 | Rate | Infections of bones, joints, and related organs           | KP | Drug-susceptible infection | 0.004  | 0.009  | 0.001 |
| Deaths | Central Europe           | Both | All Ages | All causes | 2019 | Rate | Infections of bones, joints, and related organs           | KP | No infection               | 0.013  | 0.029  | 0.004 |
| Deaths | Central Europe           | Both | All Ages | All causes | 2019 | Rate | LRIs and all related infections in the thorax             | KP | Drug-susceptible infection | 0.528  | 0.748  | 0.364 |
| Deaths | Central Europe           | Both | All Ages | All causes | 2019 | Rate | LRIs and all related infections in the thorax             | KP | No infection               | 1.840  | 2.470  | 1.390 |
| Deaths | Central Europe           | Both | All Ages | All causes | 2019 | Rate | Meningitis and other bacterial CNS infections             | KP | Drug-susceptible infection | 0.022  | 0.044  | 0.011 |
| Deaths | Central Europe           | Both | All Ages | All causes | 2019 | Rate | Meningitis and other bacterial CNS infections             | KP | No infection               | 0.075  | 0.150  | 0.041 |
| Deaths | Central Europe           | Both | All Ages | All causes | 2019 | Rate | Peritoneal and intra-abdominal infections                 | KP | Drug-susceptible infection | 0.760  | 1.170  | 0.455 |
| Deaths | Central Europe           | Both | All Ages | All causes | 2019 | Rate | Peritoneal and intra-abdominal infections                 | KP | No infection               | 2.650  | 3.940  | 1.690 |
| Deaths | Central Europe           | Both | All Ages | All causes | 2019 | Rate | Urinary tract infections and pyelonephritis               | KP | Drug-susceptible infection | 0.212  | 0.357  | 0.115 |
| Deaths | Central Europe           | Both | All Ages | All causes | 2019 | Rate | Urinary tract infections and pyelonephritis               | KP | No infection               | 0.745  | 1.210  | 0.438 |
| Deaths | Eastern Europe           | Both | All Ages | All causes | 2019 | Rate | All infectious syndromes                                  | KP | Drug-susceptible infection | 3.550  | 5.270  | 2.280 |
| Deaths | Eastern Europe           | Both | All Ages | All causes | 2019 | Rate | All infectious syndromes                                  | KP | No infection               | 10.696 | 15.454 | 6.970 |
| Deaths | Eastern Europe           | Both | All Ages | All causes | 2019 | Rate | Bacterial infections of the skin and subcutaneous systems | KP | Drug-susceptible infection | 0.043  | 0.151  | 0.007 |
| Deaths | Eastern Europe           | Both | All Ages | All causes | 2019 | Rate | Bacterial infections of the skin and subcutaneous systems | KP | No infection               | 0.128  | 0.447  | 0.020 |
| Deaths | Eastern Europe           | Both | All Ages | All causes | 2019 | Rate | Bloodstream infections                                    | KP | Drug-susceptible infection | 1.390  | 2.420  | 0.727 |
| Deaths | Eastern Europe           | Both | All Ages | All causes | 2019 | Rate | Bloodstream infections                                    | KP | No infection               | 4.170  | 7.030  | 2.210 |
| Deaths | Eastern Europe           | Both | All Ages | All causes | 2019 | Rate | Endocarditis and other cardiac infections                 | KP | Drug-susceptible infection | 0.086  | 0.142  | 0.051 |
| Deaths | Eastern Europe           | Both | All Ages | All causes | 2019 | Rate | Endocarditis and other cardiac infections                 | KP | No infection               | 0.268  | 0.443  | 0.160 |
| Deaths | Eastern Europe           | Both | All Ages | All causes | 2019 | Rate | Infections of bones, joints, and related organs           | KP | Drug-susceptible infection | 0.006  | 0.013  | 0.002 |
| Deaths | Eastern Europe           | Both | All Ages | All causes | 2019 | Rate | Infections of bones, joints, and related organs           | KP | No infection               | 0.017  | 0.041  | 0.005 |
| Deaths | Eastern Europe           | Both | All Ages | All causes | 2019 | Rate | LRIs and all related infections in the thorax             | KP | Drug-susceptible infection | 0.655  | 0.934  | 0.454 |
| Deaths | Eastern Europe           | Both | All Ages | All causes | 2019 | Rate | LRIs and all related infections in the thorax             | KP | No infection               | 1.940  | 2.690  | 1.410 |
| Deaths | Eastern Europe           | Both | All Ages | All causes | 2019 | Rate | Meningitis and other bacterial CNS infections             | KP | Drug-susceptible infection | 0.040  | 0.069  | 0.025 |
| Deaths | Eastern Europe           | Both | All Ages | All causes | 2019 | Rate | Meningitis and other bacterial CNS infections             | KP | No infection               | 0.120  | 0.208  | 0.079 |
| Deaths | Eastern Europe           | Both | All Ages | All causes | 2019 | Rate | Peritoneal and intra-abdominal infections                 | KP | Drug-susceptible infection | 1.030  | 1.520  | 0.654 |
| Deaths | Eastern Europe           | Both | All Ages | All causes | 2019 | Rate | Peritoneal and intra-abdominal infections                 | KP | No infection               | 3.110  | 4.510  | 2.010 |
| Deaths | Eastern Europe           | Both | All Ages | All causes | 2019 | Rate | Urinary tract infections and pyelonephritis               | KP | Drug-susceptible infection | 0.312  | 0.479  | 0.199 |
| Deaths | Eastern Europe           | Both | All Ages | All causes | 2019 | Rate | Urinary tract infections and pyelonephritis               | KP | No infection               | 0.937  | 1.400  | 0.618 |
| Deaths | High-income Asia Pacific | Both | All Ages | All causes | 2019 | Rate | All infectious syndromes                                  | KP | Drug-susceptible infection | 0.860  | 1.300  | 0.533 |
| Deaths | High-income Asia Pacific | Both | All Ages | All causes | 2019 | Rate | All infectious syndromes                                  | KP | No infection               | 3.760  | 5.080  | 2.770 |
| Deaths | High-income Asia Pacific | Both | All Ages | All causes | 2019 | Rate | Bacterial infections of the skin and subcutaneous systems | KP | Drug-susceptible infection | 0.008  | 0.028  | 0.001 |
| Deaths | High-income Asia Pacific | Both | All Ages | All causes | 2019 | Rate | Bacterial infections of the skin and subcutaneous systems | KP | No infection               | 0.034  | 0.124  | 0.005 |
| Deaths | High-income Asia Pacific | Both | All Ages | All causes | 2019 | Rate | Bloodstream infections                                    | KP | Drug-susceptible infection | 0.254  | 0.441  | 0.131 |
| Deaths | High-income Asia Pacific | Both | All Ages | All causes | 2019 | Rate | Bloodstream infections                                    | KP | No infection               | 1.090  | 1.790  | 0.606 |
| Deaths | High-income Asia Pacific | Both | All Ages | All causes | 2019 | Rate | Endocarditis and other cardiac infections                 | KP | Drug-susceptible infection | 0.023  | 0.037  | 0.013 |
| Deaths | High-income Asia Pacific | Both | All Ages | All causes | 2019 | Rate | Endocarditis and other cardiac infections                 | KP | No infection               | 0.105  | 0.146  | 0.061 |
| Deaths | High-income Asia Pacific | Both | All Ages | All causes | 2019 | Rate | Infections of bones, joints, and related organs           | KP | Drug-susceptible infection | 0.001  | 0.002  | 0.000 |
| Deaths | High-income Asia Pacific | Both | All Ages | All causes | 2019 | Rate | Infections of bones, joints, and related organs           | KP | No infection               | 0.004  | 0.010  | 0.001 |
| Deaths | High-income Asia Pacific | Both | All Ages | All causes | 2019 | Rate | LRIs and all related infections in the thorax             | KP | Drug-susceptible infection | 0.287  | 0.399  | 0.199 |

|        |                          |      |          |            |      |      |                                                           |    |                            |        |        |       |
|--------|--------------------------|------|----------|------------|------|------|-----------------------------------------------------------|----|----------------------------|--------|--------|-------|
| Deaths | High-income Asia Pacific | Both | All Ages | All causes | 2019 | Rate | LRIs and all related infections in the thorax             | KP | No infection               | 1.280  | 1.520  | 1.050 |
| Deaths | High-income Asia Pacific | Both | All Ages | All causes | 2019 | Rate | Meningitis and other bacterial CNS infections             | KP | Drug-susceptible infection | 0.004  | 0.008  | 0.002 |
| Deaths | High-income Asia Pacific | Both | All Ages | All causes | 2019 | Rate | Meningitis and other bacterial CNS infections             | KP | No infection               | 0.016  | 0.032  | 0.010 |
| Deaths | High-income Asia Pacific | Both | All Ages | All causes | 2019 | Rate | Peritoneal and intra-abdominal infections                 | KP | Drug-susceptible infection | 0.213  | 0.348  | 0.117 |
| Deaths | High-income Asia Pacific | Both | All Ages | All causes | 2019 | Rate | Peritoneal and intra-abdominal infections                 | KP | No infection               | 0.921  | 1.390  | 0.570 |
| Deaths | High-income Asia Pacific | Both | All Ages | All causes | 2019 | Rate | Urinary tract infections and pyelonephritis               | KP | Drug-susceptible infection | 0.069  | 0.107  | 0.043 |
| Deaths | High-income Asia Pacific | Both | All Ages | All causes | 2019 | Rate | Urinary tract infections and pyelonephritis               | KP | No infection               | 0.306  | 0.435  | 0.217 |
| Deaths | Australasia              | Both | All Ages | All causes | 2019 | Rate | All infectious syndromes                                  | KP | Drug-susceptible infection | 0.514  | 0.803  | 0.317 |
| Deaths | Australasia              | Both | All Ages | All causes | 2019 | Rate | All infectious syndromes                                  | KP | No infection               | 2.450  | 3.540  | 1.630 |
| Deaths | Australasia              | Both | All Ages | All causes | 2019 | Rate | Bacterial infections of the skin and subcutaneous systems | KP | Drug-susceptible infection | 0.009  | 0.033  | 0.001 |
| Deaths | Australasia              | Both | All Ages | All causes | 2019 | Rate | Bacterial infections of the skin and subcutaneous systems | KP | No infection               | 0.043  | 0.143  | 0.007 |
| Deaths | Australasia              | Both | All Ages | All causes | 2019 | Rate | Bloodstream infections                                    | KP | Drug-susceptible infection | 0.188  | 0.342  | 0.096 |
| Deaths | Australasia              | Both | All Ages | All causes | 2019 | Rate | Bloodstream infections                                    | KP | No infection               | 0.894  | 1.540  | 0.475 |
| Deaths | Australasia              | Both | All Ages | All causes | 2019 | Rate | Endocarditis and other cardiac infections                 | KP | Drug-susceptible infection | 0.018  | 0.028  | 0.010 |
| Deaths | Australasia              | Both | All Ages | All causes | 2019 | Rate | Endocarditis and other cardiac infections                 | KP | No infection               | 0.085  | 0.124  | 0.053 |
| Deaths | Australasia              | Both | All Ages | All causes | 2019 | Rate | Infections of bones, joints, and related organs           | KP | Drug-susceptible infection | 0.001  | 0.002  | 0.000 |
| Deaths | Australasia              | Both | All Ages | All causes | 2019 | Rate | Infections of bones, joints, and related organs           | KP | No infection               | 0.004  | 0.010  | 0.001 |
| Deaths | Australasia              | Both | All Ages | All causes | 2019 | Rate | LRIs and all related infections in the thorax             | KP | Drug-susceptible infection | 0.104  | 0.154  | 0.069 |
| Deaths | Australasia              | Both | All Ages | All causes | 2019 | Rate | LRIs and all related infections in the thorax             | KP | No infection               | 0.494  | 0.670  | 0.362 |
| Deaths | Australasia              | Both | All Ages | All causes | 2019 | Rate | Meningitis and other bacterial CNS infections             | KP | Drug-susceptible infection | 0.004  | 0.007  | 0.002 |
| Deaths | Australasia              | Both | All Ages | All causes | 2019 | Rate | Meningitis and other bacterial CNS infections             | KP | No infection               | 0.017  | 0.033  | 0.009 |
| Deaths | Australasia              | Both | All Ages | All causes | 2019 | Rate | Peritoneal and intra-abdominal infections                 | KP | Drug-susceptible infection | 0.133  | 0.214  | 0.077 |
| Deaths | Australasia              | Both | All Ages | All causes | 2019 | Rate | Peritoneal and intra-abdominal infections                 | KP | No infection               | 0.636  | 0.981  | 0.399 |
| Deaths | Australasia              | Both | All Ages | All causes | 2019 | Rate | Urinary tract infections and pyelonephritis               | KP | Drug-susceptible infection | 0.058  | 0.090  | 0.038 |
| Deaths | Australasia              | Both | All Ages | All causes | 2019 | Rate | Urinary tract infections and pyelonephritis               | KP | No infection               | 0.277  | 0.386  | 0.201 |
| Deaths | Western Europe           | Both | All Ages | All causes | 2019 | Rate | All infectious syndromes                                  | KP | Drug-susceptible infection | 1.360  | 2.020  | 0.884 |
| Deaths | Western Europe           | Both | All Ages | All causes | 2019 | Rate | All infectious syndromes                                  | KP | No infection               | 5.480  | 7.590  | 3.870 |
| Deaths | Western Europe           | Both | All Ages | All causes | 2019 | Rate | Bacterial infections of the skin and subcutaneous systems | KP | Drug-susceptible infection | 0.018  | 0.062  | 0.003 |
| Deaths | Western Europe           | Both | All Ages | All causes | 2019 | Rate | Bacterial infections of the skin and subcutaneous systems | KP | No infection               | 0.074  | 0.253  | 0.011 |
| Deaths | Western Europe           | Both | All Ages | All causes | 2019 | Rate | Bloodstream infections                                    | KP | Drug-susceptible infection | 0.448  | 0.778  | 0.228 |
| Deaths | Western Europe           | Both | All Ages | All causes | 2019 | Rate | Bloodstream infections                                    | KP | No infection               | 1.790  | 3.020  | 0.952 |
| Deaths | Western Europe           | Both | All Ages | All causes | 2019 | Rate | Endocarditis and other cardiac infections                 | KP | Drug-susceptible infection | 0.063  | 0.093  | 0.035 |
| Deaths | Western Europe           | Both | All Ages | All causes | 2019 | Rate | Endocarditis and other cardiac infections                 | KP | No infection               | 0.254  | 0.351  | 0.159 |
| Deaths | Western Europe           | Both | All Ages | All causes | 2019 | Rate | Infections of bones, joints, and related organs           | KP | Drug-susceptible infection | 0.002  | 0.004  | 0.001 |
| Deaths | Western Europe           | Both | All Ages | All causes | 2019 | Rate | Infections of bones, joints, and related organs           | KP | No infection               | 0.007  | 0.016  | 0.002 |
| Deaths | Western Europe           | Both | All Ages | All causes | 2019 | Rate | LRIs and all related infections in the thorax             | KP | Drug-susceptible infection | 0.293  | 0.398  | 0.210 |
| Deaths | Western Europe           | Both | All Ages | All causes | 2019 | Rate | LRIs and all related infections in the thorax             | KP | No infection               | 1.190  | 1.480  | 0.967 |
| Deaths | Western Europe           | Both | All Ages | All causes | 2019 | Rate | Meningitis and other bacterial CNS infections             | KP | Drug-susceptible infection | 0.007  | 0.014  | 0.004 |
| Deaths | Western Europe           | Both | All Ages | All causes | 2019 | Rate | Meningitis and other bacterial CNS infections             | KP | No infection               | 0.030  | 0.054  | 0.019 |
| Deaths | Western Europe           | Both | All Ages | All causes | 2019 | Rate | Peritoneal and intra-abdominal infections                 | KP | Drug-susceptible infection | 0.376  | 0.568  | 0.226 |
| Deaths | Western Europe           | Both | All Ages | All causes | 2019 | Rate | Peritoneal and intra-abdominal infections                 | KP | No infection               | 1.520  | 2.200  | 1.010 |
| Deaths | Western Europe           | Both | All Ages | All causes | 2019 | Rate | Urinary tract infections and pyelonephritis               | KP | Drug-susceptible infection | 0.149  | 0.212  | 0.101 |
| Deaths | Western Europe           | Both | All Ages | All causes | 2019 | Rate | Urinary tract infections and pyelonephritis               | KP | No infection               | 0.615  | 0.822  | 0.459 |
| Deaths | Southern Latin America   | Both | All Ages | All causes | 2019 | Rate | All infectious syndromes                                  | KP | Drug-susceptible infection | 2.910  | 4.190  | 1.970 |
| Deaths | Southern Latin America   | Both | All Ages | All causes | 2019 | Rate | All infectious syndromes                                  | KP | No infection               | 10.130 | 13.329 | 7.630 |
| Deaths | Southern Latin America   | Both | All Ages | All causes | 2019 | Rate | Bacterial infections of the skin and subcutaneous systems | KP | Drug-susceptible infection | 0.032  | 0.110  | 0.005 |
| Deaths | Southern Latin America   | Both | All Ages | All causes | 2019 | Rate | Bacterial infections of the skin and subcutaneous systems | KP | No infection               | 0.113  | 0.366  | 0.019 |

|        |                           |      |          |            |      |      |                                                           |    |                            |       |        |       |
|--------|---------------------------|------|----------|------------|------|------|-----------------------------------------------------------|----|----------------------------|-------|--------|-------|
| Deaths | Southern Latin America    | Both | All Ages | All causes | 2019 | Rate | Bloodstream infections                                    | KP | Drug-susceptible infection | 0.784 | 1.390  | 0.397 |
| Deaths | Southern Latin America    | Both | All Ages | All causes | 2019 | Rate | Bloodstream infections                                    | KP | No infection               | 2.730 | 4.610  | 1.480 |
| Deaths | Southern Latin America    | Both | All Ages | All causes | 2019 | Rate | Endocarditis and other cardiac infections                 | KP | Drug-susceptible infection | 0.082 | 0.114  | 0.056 |
| Deaths | Southern Latin America    | Both | All Ages | All causes | 2019 | Rate | Endocarditis and other cardiac infections                 | KP | No infection               | 0.285 | 0.356  | 0.224 |
| Deaths | Southern Latin America    | Both | All Ages | All causes | 2019 | Rate | Infections of bones, joints, and related organs           | KP | Drug-susceptible infection | 0.003 | 0.007  | 0.001 |
| Deaths | Southern Latin America    | Both | All Ages | All causes | 2019 | Rate | Infections of bones, joints, and related organs           | KP | No infection               | 0.010 | 0.024  | 0.003 |
| Deaths | Southern Latin America    | Both | All Ages | All causes | 2019 | Rate | LRIs and all related infections in the thorax             | KP | Drug-susceptible infection | 1.090 | 1.440  | 0.798 |
| Deaths | Southern Latin America    | Both | All Ages | All causes | 2019 | Rate | LRIs and all related infections in the thorax             | KP | No infection               | 3.760 | 4.420  | 3.190 |
| Deaths | Southern Latin America    | Both | All Ages | All causes | 2019 | Rate | Meningitis and other bacterial CNS infections             | KP | Drug-susceptible infection | 0.025 | 0.040  | 0.017 |
| Deaths | Southern Latin America    | Both | All Ages | All causes | 2019 | Rate | Meningitis and other bacterial CNS infections             | KP | No infection               | 0.088 | 0.133  | 0.065 |
| Deaths | Southern Latin America    | Both | All Ages | All causes | 2019 | Rate | Peritoneal and intra-abdominal infections                 | KP | Drug-susceptible infection | 0.622 | 0.939  | 0.386 |
| Deaths | Southern Latin America    | Both | All Ages | All causes | 2019 | Rate | Peritoneal and intra-abdominal infections                 | KP | No infection               | 2.170 | 3.140  | 1.480 |
| Deaths | Southern Latin America    | Both | All Ages | All causes | 2019 | Rate | Urinary tract infections and pyelonephritis               | KP | Drug-susceptible infection | 0.277 | 0.391  | 0.182 |
| Deaths | Southern Latin America    | Both | All Ages | All causes | 2019 | Rate | Urinary tract infections and pyelonephritis               | KP | No infection               | 0.966 | 1.250  | 0.708 |
| Deaths | High-income North America | Both | All Ages | All causes | 2019 | Rate | All infectious syndromes                                  | KP | Drug-susceptible infection | 0.768 | 1.190  | 0.490 |
| Deaths | High-income North America | Both | All Ages | All causes | 2019 | Rate | All infectious syndromes                                  | KP | No infection               | 3.190 | 4.540  | 2.220 |
| Deaths | High-income North America | Both | All Ages | All causes | 2019 | Rate | Bacterial infections of the skin and subcutaneous systems | KP | Drug-susceptible infection | 0.009 | 0.031  | 0.002 |
| Deaths | High-income North America | Both | All Ages | All causes | 2019 | Rate | Bacterial infections of the skin and subcutaneous systems | KP | No infection               | 0.040 | 0.128  | 0.007 |
| Deaths | High-income North America | Both | All Ages | All causes | 2019 | Rate | Bloodstream infections                                    | KP | Drug-susceptible infection | 0.261 | 0.461  | 0.133 |
| Deaths | High-income North America | Both | All Ages | All causes | 2019 | Rate | Bloodstream infections                                    | KP | No infection               | 1.090 | 1.840  | 0.587 |
| Deaths | High-income North America | Both | All Ages | All causes | 2019 | Rate | Endocarditis and other cardiac infections                 | KP | Drug-susceptible infection | 0.029 | 0.042  | 0.016 |
| Deaths | High-income North America | Both | All Ages | All causes | 2019 | Rate | Endocarditis and other cardiac infections                 | KP | No infection               | 0.119 | 0.157  | 0.073 |
| Deaths | High-income North America | Both | All Ages | All causes | 2019 | Rate | Infections of bones, joints, and related organs           | KP | Drug-susceptible infection | 0.001 | 0.003  | 0.000 |
| Deaths | High-income North America | Both | All Ages | All causes | 2019 | Rate | Infections of bones, joints, and related organs           | KP | No infection               | 0.005 | 0.012  | 0.002 |
| Deaths | High-income North America | Both | All Ages | All causes | 2019 | Rate | LRIs and all related infections in the thorax             | KP | Drug-susceptible infection | 0.175 | 0.250  | 0.118 |
| Deaths | High-income North America | Both | All Ages | All causes | 2019 | Rate | LRIs and all related infections in the thorax             | KP | No infection               | 0.726 | 0.976  | 0.544 |
| Deaths | High-income North America | Both | All Ages | All causes | 2019 | Rate | Meningitis and other bacterial CNS infections             | KP | Drug-susceptible infection | 0.005 | 0.009  | 0.003 |
| Deaths | High-income North America | Both | All Ages | All causes | 2019 | Rate | Meningitis and other bacterial CNS infections             | KP | No infection               | 0.021 | 0.038  | 0.013 |
| Deaths | High-income North America | Both | All Ages | All causes | 2019 | Rate | Peritoneal and intra-abdominal infections                 | KP | Drug-susceptible infection | 0.202 | 0.309  | 0.121 |
| Deaths | High-income North America | Both | All Ages | All causes | 2019 | Rate | Peritoneal and intra-abdominal infections                 | KP | No infection               | 0.842 | 1.230  | 0.558 |
| Deaths | High-income North America | Both | All Ages | All causes | 2019 | Rate | Urinary tract infections and pyelonephritis               | KP | Drug-susceptible infection | 0.086 | 0.123  | 0.059 |
| Deaths | High-income North America | Both | All Ages | All causes | 2019 | Rate | Urinary tract infections and pyelonephritis               | KP | No infection               | 0.356 | 0.478  | 0.273 |
| Deaths | Caribbean                 | Both | All Ages | All causes | 2019 | Rate | All infectious syndromes                                  | KP | Drug-susceptible infection | 2.490 | 3.870  | 1.490 |
| Deaths | Caribbean                 | Both | All Ages | All causes | 2019 | Rate | All infectious syndromes                                  | KP | No infection               | 9.490 | 13.423 | 6.560 |
| Deaths | Caribbean                 | Both | All Ages | All causes | 2019 | Rate | Bacterial infections of the skin and subcutaneous systems | KP | Drug-susceptible infection | 0.035 | 0.125  | 0.006 |
| Deaths | Caribbean                 | Both | All Ages | All causes | 2019 | Rate | Bacterial infections of the skin and subcutaneous systems | KP | No infection               | 0.133 | 0.439  | 0.021 |
| Deaths | Caribbean                 | Both | All Ages | All causes | 2019 | Rate | Bloodstream infections                                    | KP | Drug-susceptible infection | 0.838 | 1.440  | 0.438 |
| Deaths | Caribbean                 | Both | All Ages | All causes | 2019 | Rate | Bloodstream infections                                    | KP | No infection               | 3.220 | 5.040  | 1.860 |
| Deaths | Caribbean                 | Both | All Ages | All causes | 2019 | Rate | Endocarditis and other cardiac infections                 | KP | Drug-susceptible infection | 0.027 | 0.039  | 0.017 |
| Deaths | Caribbean                 | Both | All Ages | All causes | 2019 | Rate | Endocarditis and other cardiac infections                 | KP | No infection               | 0.102 | 0.133  | 0.077 |
| Deaths | Caribbean                 | Both | All Ages | All causes | 2019 | Rate | Infections of bones, joints, and related organs           | KP | Drug-susceptible infection | 0.005 | 0.012  | 0.001 |
| Deaths | Caribbean                 | Both | All Ages | All causes | 2019 | Rate | Infections of bones, joints, and related organs           | KP | No infection               | 0.017 | 0.042  | 0.005 |
| Deaths | Caribbean                 | Both | All Ages | All causes | 2019 | Rate | LRIs and all related infections in the thorax             | KP | Drug-susceptible infection | 0.839 | 1.240  | 0.537 |
| Deaths | Caribbean                 | Both | All Ages | All causes | 2019 | Rate | LRIs and all related infections in the thorax             | KP | No infection               | 3.200 | 4.190  | 2.390 |
| Deaths | Caribbean                 | Both | All Ages | All causes | 2019 | Rate | Meningitis and other bacterial CNS infections             | KP | Drug-susceptible infection | 0.128 | 0.223  | 0.068 |
| Deaths | Caribbean                 | Both | All Ages | All causes | 2019 | Rate | Meningitis and other bacterial CNS infections             | KP | No infection               | 0.488 | 0.792  | 0.298 |
| Deaths | Caribbean                 | Both | All Ages | All causes | 2019 | Rate | Peritoneal and intra-abdominal infections                 | KP | Drug-susceptible infection | 0.512 | 0.852  | 0.285 |

|        |                        |      |          |            |      |      |                                                           |    |                            |        |        |       |
|--------|------------------------|------|----------|------------|------|------|-----------------------------------------------------------|----|----------------------------|--------|--------|-------|
| Deaths | Caribbean              | Both | All Ages | All causes | 2019 | Rate | Peritoneal and intra-abdominal infections                 | KP | No infection               | 1.950  | 2.980  | 1.230 |
| Deaths | Caribbean              | Both | All Ages | All causes | 2019 | Rate | Urinary tract infections and pyelonephritis               | KP | Drug-susceptible infection | 0.104  | 0.168  | 0.062 |
| Deaths | Caribbean              | Both | All Ages | All causes | 2019 | Rate | Urinary tract infections and pyelonephritis               | KP | No infection               | 0.388  | 0.550  | 0.269 |
| Deaths | Andean Latin America   | Both | All Ages | All causes | 2019 | Rate | All infectious syndromes                                  | KP | Drug-susceptible infection | 2.760  | 4.070  | 1.780 |
| Deaths | Andean Latin America   | Both | All Ages | All causes | 2019 | Rate | All infectious syndromes                                  | KP | No infection               | 10.188 | 13.945 | 7.120 |
| Deaths | Andean Latin America   | Both | All Ages | All causes | 2019 | Rate | Bacterial infections of the skin and subcutaneous systems | KP | Drug-susceptible infection | 0.014  | 0.052  | 0.002 |
| Deaths | Andean Latin America   | Both | All Ages | All causes | 2019 | Rate | Bacterial infections of the skin and subcutaneous systems | KP | No infection               | 0.051  | 0.192  | 0.006 |
| Deaths | Andean Latin America   | Both | All Ages | All causes | 2019 | Rate | Bloodstream infections                                    | KP | Drug-susceptible infection | 0.875  | 1.450  | 0.481 |
| Deaths | Andean Latin America   | Both | All Ages | All causes | 2019 | Rate | Bloodstream infections                                    | KP | No infection               | 3.210  | 5.010  | 1.860 |
| Deaths | Andean Latin America   | Both | All Ages | All causes | 2019 | Rate | Endocarditis and other cardiac infections                 | KP | Drug-susceptible infection | 0.020  | 0.030  | 0.013 |
| Deaths | Andean Latin America   | Both | All Ages | All causes | 2019 | Rate | Endocarditis and other cardiac infections                 | KP | No infection               | 0.075  | 0.100  | 0.056 |
| Deaths | Andean Latin America   | Both | All Ages | All causes | 2019 | Rate | Infections of bones, joints, and related organs           | KP | Drug-susceptible infection | 0.003  | 0.008  | 0.001 |
| Deaths | Andean Latin America   | Both | All Ages | All causes | 2019 | Rate | Infections of bones, joints, and related organs           | KP | No infection               | 0.011  | 0.027  | 0.003 |
| Deaths | Andean Latin America   | Both | All Ages | All causes | 2019 | Rate | LRIs and all related infections in the thorax             | KP | Drug-susceptible infection | 1.100  | 1.570  | 0.729 |
| Deaths | Andean Latin America   | Both | All Ages | All causes | 2019 | Rate | LRIs and all related infections in the thorax             | KP | No infection               | 4.060  | 5.200  | 3.150 |
| Deaths | Andean Latin America   | Both | All Ages | All causes | 2019 | Rate | Meningitis and other bacterial CNS infections             | KP | Drug-susceptible infection | 0.024  | 0.045  | 0.014 |
| Deaths | Andean Latin America   | Both | All Ages | All causes | 2019 | Rate | Meningitis and other bacterial CNS infections             | KP | No infection               | 0.089  | 0.153  | 0.056 |
| Deaths | Andean Latin America   | Both | All Ages | All causes | 2019 | Rate | Peritoneal and intra-abdominal infections                 | KP | Drug-susceptible infection | 0.612  | 0.954  | 0.363 |
| Deaths | Andean Latin America   | Both | All Ages | All causes | 2019 | Rate | Peritoneal and intra-abdominal infections                 | KP | No infection               | 2.240  | 3.330  | 1.440 |
| Deaths | Andean Latin America   | Both | All Ages | All causes | 2019 | Rate | Urinary tract infections and pyelonephritis               | KP | Drug-susceptible infection | 0.121  | 0.190  | 0.073 |
| Deaths | Andean Latin America   | Both | All Ages | All causes | 2019 | Rate | Urinary tract infections and pyelonephritis               | KP | No infection               | 0.448  | 0.642  | 0.298 |
| Deaths | Central Latin America  | Both | All Ages | All causes | 2019 | Rate | All infectious syndromes                                  | KP | Drug-susceptible infection | 1.870  | 2.870  | 1.130 |
| Deaths | Central Latin America  | Both | All Ages | All causes | 2019 | Rate | All infectious syndromes                                  | KP | No infection               | 6.960  | 9.840  | 4.720 |
| Deaths | Central Latin America  | Both | All Ages | All causes | 2019 | Rate | Bacterial infections of the skin and subcutaneous systems | KP | Drug-susceptible infection | 0.020  | 0.069  | 0.003 |
| Deaths | Central Latin America  | Both | All Ages | All causes | 2019 | Rate | Bacterial infections of the skin and subcutaneous systems | KP | No infection               | 0.074  | 0.263  | 0.012 |
| Deaths | Central Latin America  | Both | All Ages | All causes | 2019 | Rate | Bloodstream infections                                    | KP | Drug-susceptible infection | 0.671  | 1.150  | 0.348 |
| Deaths | Central Latin America  | Both | All Ages | All causes | 2019 | Rate | Bloodstream infections                                    | KP | No infection               | 2.500  | 4.020  | 1.380 |
| Deaths | Central Latin America  | Both | All Ages | All causes | 2019 | Rate | Endocarditis and other cardiac infections                 | KP | Drug-susceptible infection | 0.019  | 0.028  | 0.012 |
| Deaths | Central Latin America  | Both | All Ages | All causes | 2019 | Rate | Endocarditis and other cardiac infections                 | KP | No infection               | 0.068  | 0.094  | 0.049 |
| Deaths | Central Latin America  | Both | All Ages | All causes | 2019 | Rate | Infections of bones, joints, and related organs           | KP | Drug-susceptible infection | 0.003  | 0.007  | 0.001 |
| Deaths | Central Latin America  | Both | All Ages | All causes | 2019 | Rate | Infections of bones, joints, and related organs           | KP | No infection               | 0.011  | 0.026  | 0.003 |
| Deaths | Central Latin America  | Both | All Ages | All causes | 2019 | Rate | LRIs and all related infections in the thorax             | KP | Drug-susceptible infection | 0.471  | 0.699  | 0.308 |
| Deaths | Central Latin America  | Both | All Ages | All causes | 2019 | Rate | LRIs and all related infections in the thorax             | KP | No infection               | 1.760  | 2.390  | 1.290 |
| Deaths | Central Latin America  | Both | All Ages | All causes | 2019 | Rate | Meningitis and other bacterial CNS infections             | KP | Drug-susceptible infection | 0.020  | 0.034  | 0.012 |
| Deaths | Central Latin America  | Both | All Ages | All causes | 2019 | Rate | Meningitis and other bacterial CNS infections             | KP | No infection               | 0.073  | 0.121  | 0.049 |
| Deaths | Central Latin America  | Both | All Ages | All causes | 2019 | Rate | Peritoneal and intra-abdominal infections                 | KP | Drug-susceptible infection | 0.543  | 0.852  | 0.325 |
| Deaths | Central Latin America  | Both | All Ages | All causes | 2019 | Rate | Peritoneal and intra-abdominal infections                 | KP | No infection               | 2.020  | 2.920  | 1.340 |
| Deaths | Central Latin America  | Both | All Ages | All causes | 2019 | Rate | Urinary tract infections and pyelonephritis               | KP | Drug-susceptible infection | 0.124  | 0.197  | 0.076 |
| Deaths | Central Latin America  | Both | All Ages | All causes | 2019 | Rate | Urinary tract infections and pyelonephritis               | KP | No infection               | 0.458  | 0.660  | 0.313 |
| Deaths | Tropical Latin America | Both | All Ages | All causes | 2019 | Rate | All infectious syndromes                                  | KP | Drug-susceptible infection | 2.640  | 3.690  | 1.840 |
| Deaths | Tropical Latin America | Both | All Ages | All causes | 2019 | Rate | All infectious syndromes                                  | KP | No infection               | 8.860  | 11.819 | 6.500 |
| Deaths | Tropical Latin America | Both | All Ages | All causes | 2019 | Rate | Bacterial infections of the skin and subcutaneous systems | KP | Drug-susceptible infection | 0.029  | 0.099  | 0.005 |
| Deaths | Tropical Latin America | Both | All Ages | All causes | 2019 | Rate | Bacterial infections of the skin and subcutaneous systems | KP | No infection               | 0.096  | 0.324  | 0.017 |
| Deaths | Tropical Latin America | Both | All Ages | All causes | 2019 | Rate | Bloodstream infections                                    | KP | Drug-susceptible infection | 0.827  | 1.360  | 0.449 |
| Deaths | Tropical Latin America | Both | All Ages | All causes | 2019 | Rate | Bloodstream infections                                    | KP | No infection               | 2.780  | 4.540  | 1.600 |
| Deaths | Tropical Latin America | Both | All Ages | All causes | 2019 | Rate | Endocarditis and other cardiac infections                 | KP | Drug-susceptible infection | 0.046  | 0.062  | 0.032 |
| Deaths | Tropical Latin America | Both | All Ages | All causes | 2019 | Rate | Endocarditis and other cardiac infections                 | KP | No infection               | 0.155  | 0.195  | 0.116 |

|        |                              |      |          |            |      |      |                                                           |    |                            |       |        |       |
|--------|------------------------------|------|----------|------------|------|------|-----------------------------------------------------------|----|----------------------------|-------|--------|-------|
| Deaths | Tropical Latin America       | Both | All Ages | All causes | 2019 | Rate | Infections of bones, joints, and related organs           | KP | Drug-susceptible infection | 0.004 | 0.009  | 0.001 |
| Deaths | Tropical Latin America       | Both | All Ages | All causes | 2019 | Rate | Infections of bones, joints, and related organs           | KP | No infection               | 0.012 | 0.029  | 0.003 |
| Deaths | Tropical Latin America       | Both | All Ages | All causes | 2019 | Rate | LRIs and all related infections in the thorax             | KP | Drug-susceptible infection | 0.914 | 1.200  | 0.676 |
| Deaths | Tropical Latin America       | Both | All Ages | All causes | 2019 | Rate | LRIs and all related infections in the thorax             | KP | No infection               | 3.070 | 3.820  | 2.490 |
| Deaths | Tropical Latin America       | Both | All Ages | All causes | 2019 | Rate | Meningitis and other bacterial CNS infections             | KP | Drug-susceptible infection | 0.028 | 0.043  | 0.019 |
| Deaths | Tropical Latin America       | Both | All Ages | All causes | 2019 | Rate | Meningitis and other bacterial CNS infections             | KP | No infection               | 0.094 | 0.141  | 0.066 |
| Deaths | Tropical Latin America       | Both | All Ages | All causes | 2019 | Rate | Peritoneal and intra-abdominal infections                 | KP | Drug-susceptible infection | 0.543 | 0.802  | 0.351 |
| Deaths | Tropical Latin America       | Both | All Ages | All causes | 2019 | Rate | Peritoneal and intra-abdominal infections                 | KP | No infection               | 1.820 | 2.610  | 1.250 |
| Deaths | Tropical Latin America       | Both | All Ages | All causes | 2019 | Rate | Urinary tract infections and pyelonephritis               | KP | Drug-susceptible infection | 0.248 | 0.328  | 0.171 |
| Deaths | Tropical Latin America       | Both | All Ages | All causes | 2019 | Rate | Urinary tract infections and pyelonephritis               | KP | No infection               | 0.834 | 1.050  | 0.610 |
| Deaths | North Africa and Middle East | Both | All Ages | All causes | 2019 | Rate | All infectious syndromes                                  | KP | Drug-susceptible infection | 1.860 | 2.780  | 1.170 |
| Deaths | North Africa and Middle East | Both | All Ages | All causes | 2019 | Rate | All infectious syndromes                                  | KP | No infection               | 6.100 | 8.770  | 4.120 |
| Deaths | North Africa and Middle East | Both | All Ages | All causes | 2019 | Rate | Bacterial infections of the skin and subcutaneous systems | KP | Drug-susceptible infection | 0.015 | 0.056  | 0.002 |
| Deaths | North Africa and Middle East | Both | All Ages | All causes | 2019 | Rate | Bacterial infections of the skin and subcutaneous systems | KP | No infection               | 0.048 | 0.186  | 0.006 |
| Deaths | North Africa and Middle East | Both | All Ages | All causes | 2019 | Rate | Bloodstream infections                                    | KP | Drug-susceptible infection | 0.660 | 1.110  | 0.353 |
| Deaths | North Africa and Middle East | Both | All Ages | All causes | 2019 | Rate | Bloodstream infections                                    | KP | No infection               | 2.200 | 3.500  | 1.250 |
| Deaths | North Africa and Middle East | Both | All Ages | All causes | 2019 | Rate | Endocarditis and other cardiac infections                 | KP | Drug-susceptible infection | 0.025 | 0.037  | 0.016 |
| Deaths | North Africa and Middle East | Both | All Ages | All causes | 2019 | Rate | Endocarditis and other cardiac infections                 | KP | No infection               | 0.081 | 0.116  | 0.056 |
| Deaths | North Africa and Middle East | Both | All Ages | All causes | 2019 | Rate | Infections of bones, joints, and related organs           | KP | Drug-susceptible infection | 0.005 | 0.013  | 0.001 |
| Deaths | North Africa and Middle East | Both | All Ages | All causes | 2019 | Rate | Infections of bones, joints, and related organs           | KP | No infection               | 0.017 | 0.040  | 0.004 |
| Deaths | North Africa and Middle East | Both | All Ages | All causes | 2019 | Rate | LRIs and all related infections in the thorax             | KP | Drug-susceptible infection | 0.579 | 0.809  | 0.388 |
| Deaths | North Africa and Middle East | Both | All Ages | All causes | 2019 | Rate | LRIs and all related infections in the thorax             | KP | No infection               | 1.950 | 2.530  | 1.480 |
| Deaths | North Africa and Middle East | Both | All Ages | All causes | 2019 | Rate | Meningitis and other bacterial CNS infections             | KP | Drug-susceptible infection | 0.059 | 0.111  | 0.032 |
| Deaths | North Africa and Middle East | Both | All Ages | All causes | 2019 | Rate | Meningitis and other bacterial CNS infections             | KP | No infection               | 0.202 | 0.368  | 0.117 |
| Deaths | North Africa and Middle East | Both | All Ages | All causes | 2019 | Rate | Peritoneal and intra-abdominal infections                 | KP | Drug-susceptible infection | 0.454 | 0.709  | 0.268 |
| Deaths | North Africa and Middle East | Both | All Ages | All causes | 2019 | Rate | Peritoneal and intra-abdominal infections                 | KP | No infection               | 1.400 | 2.130  | 0.857 |
| Deaths | North Africa and Middle East | Both | All Ages | All causes | 2019 | Rate | Urinary tract infections and pyelonephritis               | KP | Drug-susceptible infection | 0.062 | 0.113  | 0.030 |
| Deaths | North Africa and Middle East | Both | All Ages | All causes | 2019 | Rate | Urinary tract infections and pyelonephritis               | KP | No infection               | 0.201 | 0.346  | 0.100 |
| Deaths | South Asia                   | Both | All Ages | All causes | 2019 | Rate | All infectious syndromes                                  | KP | Drug-susceptible infection | 3.420 | 4.870  | 2.370 |
| Deaths | South Asia                   | Both | All Ages | All causes | 2019 | Rate | All infectious syndromes                                  | KP | No infection               | 9.710 | 13.353 | 6.880 |
| Deaths | South Asia                   | Both | All Ages | All causes | 2019 | Rate | Bacterial infections of the skin and subcutaneous systems | KP | Drug-susceptible infection | 0.028 | 0.112  | 0.003 |
| Deaths | South Asia                   | Both | All Ages | All causes | 2019 | Rate | Bacterial infections of the skin and subcutaneous systems | KP | No infection               | 0.078 | 0.308  | 0.008 |
| Deaths | South Asia                   | Both | All Ages | All causes | 2019 | Rate | Bloodstream infections                                    | KP | Drug-susceptible infection | 1.150 | 1.850  | 0.647 |
| Deaths | South Asia                   | Both | All Ages | All causes | 2019 | Rate | Bloodstream infections                                    | KP | No infection               | 3.300 | 5.300  | 1.890 |
| Deaths | South Asia                   | Both | All Ages | All causes | 2019 | Rate | Endocarditis and other cardiac infections                 | KP | Drug-susceptible infection | 0.030 | 0.043  | 0.021 |
| Deaths | South Asia                   | Both | All Ages | All causes | 2019 | Rate | Endocarditis and other cardiac infections                 | KP | No infection               | 0.085 | 0.120  | 0.060 |
| Deaths | South Asia                   | Both | All Ages | All causes | 2019 | Rate | Infections of bones, joints, and related organs           | KP | Drug-susceptible infection | 0.008 | 0.020  | 0.002 |
| Deaths | South Asia                   | Both | All Ages | All causes | 2019 | Rate | Infections of bones, joints, and related organs           | KP | No infection               | 0.023 | 0.054  | 0.006 |
| Deaths | South Asia                   | Both | All Ages | All causes | 2019 | Rate | LRIs and all related infections in the thorax             | KP | Drug-susceptible infection | 1.270 | 1.670  | 0.944 |
| Deaths | South Asia                   | Both | All Ages | All causes | 2019 | Rate | LRIs and all related infections in the thorax             | KP | No infection               | 3.600 | 4.650  | 2.750 |
| Deaths | South Asia                   | Both | All Ages | All causes | 2019 | Rate | Meningitis and other bacterial CNS infections             | KP | Drug-susceptible infection | 0.140 | 0.203  | 0.097 |
| Deaths | South Asia                   | Both | All Ages | All causes | 2019 | Rate | Meningitis and other bacterial CNS infections             | KP | No infection               | 0.397 | 0.570  | 0.284 |
| Deaths | South Asia                   | Both | All Ages | All causes | 2019 | Rate | Peritoneal and intra-abdominal infections                 | KP | Drug-susceptible infection | 0.654 | 1.020  | 0.402 |
| Deaths | South Asia                   | Both | All Ages | All causes | 2019 | Rate | Peritoneal and intra-abdominal infections                 | KP | No infection               | 1.830 | 2.770  | 1.150 |
| Deaths | South Asia                   | Both | All Ages | All causes | 2019 | Rate | Urinary tract infections and pyelonephritis               | KP | Drug-susceptible infection | 0.142 | 0.200  | 0.098 |
| Deaths | South Asia                   | Both | All Ages | All causes | 2019 | Rate | Urinary tract infections and pyelonephritis               | KP | No infection               | 0.395 | 0.547  | 0.283 |
| Deaths | Central Sub-Saharan Africa   | Both | All Ages | All causes | 2019 | Rate | All infectious syndromes                                  | KP | Drug-susceptible infection | 3.690 | 5.430  | 2.300 |



|        |                             |      |          |            |      |      |                                                           |    |                            |        |        |        |
|--------|-----------------------------|------|----------|------------|------|------|-----------------------------------------------------------|----|----------------------------|--------|--------|--------|
| Deaths | Central Sub-Saharan Africa  | Both | All Ages | All causes | 2019 | Rate | All infectious syndromes                                  | KP | No infection               | 14.177 | 18.627 | 10.735 |
| Deaths | Central Sub-Saharan Africa  | Both | All Ages | All causes | 2019 | Rate | Bacterial infections of the skin and subcutaneous systems | KP | Drug-susceptible infection | 0.016  | 0.070  | 0.001  |
| Deaths | Central Sub-Saharan Africa  | Both | All Ages | All causes | 2019 | Rate | Bacterial infections of the skin and subcutaneous systems | KP | No infection               | 0.063  | 0.266  | 0.005  |
| Deaths | Central Sub-Saharan Africa  | Both | All Ages | All causes | 2019 | Rate | Bloodstream infections                                    | KP | Drug-susceptible infection | 1.030  | 1.690  | 0.575  |
| Deaths | Central Sub-Saharan Africa  | Both | All Ages | All causes | 2019 | Rate | Bloodstream infections                                    | KP | No infection               | 3.970  | 5.810  | 2.620  |
| Deaths | Central Sub-Saharan Africa  | Both | All Ages | All causes | 2019 | Rate | Endocarditis and other cardiac infections                 | KP | Drug-susceptible infection | 0.018  | 0.031  | 0.010  |
| Deaths | Central Sub-Saharan Africa  | Both | All Ages | All causes | 2019 | Rate | Endocarditis and other cardiac infections                 | KP | No infection               | 0.071  | 0.107  | 0.046  |
| Deaths | Central Sub-Saharan Africa  | Both | All Ages | All causes | 2019 | Rate | Infections of bones, joints, and related organs           | KP | Drug-susceptible infection | 0.005  | 0.014  | 0.001  |
| Deaths | Central Sub-Saharan Africa  | Both | All Ages | All causes | 2019 | Rate | Infections of bones, joints, and related organs           | KP | No infection               | 0.020  | 0.050  | 0.005  |
| Deaths | Central Sub-Saharan Africa  | Both | All Ages | All causes | 2019 | Rate | LRIs and all related infections in the thorax             | KP | Drug-susceptible infection | 1.940  | 2.840  | 1.230  |
| Deaths | Central Sub-Saharan Africa  | Both | All Ages | All causes | 2019 | Rate | LRIs and all related infections in the thorax             | KP | No infection               | 7.480  | 9.630  | 5.740  |
| Deaths | Central Sub-Saharan Africa  | Both | All Ages | All causes | 2019 | Rate | Meningitis and other bacterial CNS infections             | KP | Drug-susceptible infection | 0.218  | 0.351  | 0.125  |
| Deaths | Central Sub-Saharan Africa  | Both | All Ages | All causes | 2019 | Rate | Meningitis and other bacterial CNS infections             | KP | No infection               | 0.841  | 1.240  | 0.564  |
| Deaths | Central Sub-Saharan Africa  | Both | All Ages | All causes | 2019 | Rate | Peritoneal and intra-abdominal infections                 | KP | Drug-susceptible infection | 0.425  | 0.727  | 0.222  |
| Deaths | Central Sub-Saharan Africa  | Both | All Ages | All causes | 2019 | Rate | Peritoneal and intra-abdominal infections                 | KP | No infection               | 1.630  | 2.630  | 0.977  |
| Deaths | Central Sub-Saharan Africa  | Both | All Ages | All causes | 2019 | Rate | Urinary tract infections and pyelonephritis               | KP | Drug-susceptible infection | 0.025  | 0.042  | 0.013  |
| Deaths | Central Sub-Saharan Africa  | Both | All Ages | All causes | 2019 | Rate | Urinary tract infections and pyelonephritis               | KP | No infection               | 0.097  | 0.148  | 0.056  |
| Deaths | Eastern Sub-Saharan Africa  | Both | All Ages | All causes | 2019 | Rate | All infectious syndromes                                  | KP | Drug-susceptible infection | 4.170  | 5.960  | 2.730  |
| Deaths | Eastern Sub-Saharan Africa  | Both | All Ages | All causes | 2019 | Rate | All infectious syndromes                                  | KP | No infection               | 15.420 | 19.831 | 11.856 |
| Deaths | Eastern Sub-Saharan Africa  | Both | All Ages | All causes | 2019 | Rate | Bacterial infections of the skin and subcutaneous systems | KP | Drug-susceptible infection | 0.018  | 0.073  | 0.002  |
| Deaths | Eastern Sub-Saharan Africa  | Both | All Ages | All causes | 2019 | Rate | Bacterial infections of the skin and subcutaneous systems | KP | No infection               | 0.065  | 0.263  | 0.006  |
| Deaths | Eastern Sub-Saharan Africa  | Both | All Ages | All causes | 2019 | Rate | Bloodstream infections                                    | KP | Drug-susceptible infection | 1.370  | 2.140  | 0.830  |
| Deaths | Eastern Sub-Saharan Africa  | Both | All Ages | All causes | 2019 | Rate | Bloodstream infections                                    | KP | No infection               | 5.070  | 7.350  | 3.360  |
| Deaths | Eastern Sub-Saharan Africa  | Both | All Ages | All causes | 2019 | Rate | Endocarditis and other cardiac infections                 | KP | Drug-susceptible infection | 0.019  | 0.032  | 0.011  |
| Deaths | Eastern Sub-Saharan Africa  | Both | All Ages | All causes | 2019 | Rate | Endocarditis and other cardiac infections                 | KP | No infection               | 0.071  | 0.106  | 0.048  |
| Deaths | Eastern Sub-Saharan Africa  | Both | All Ages | All causes | 2019 | Rate | Infections of bones, joints, and related organs           | KP | Drug-susceptible infection | 0.006  | 0.014  | 0.002  |
| Deaths | Eastern Sub-Saharan Africa  | Both | All Ages | All causes | 2019 | Rate | Infections of bones, joints, and related organs           | KP | No infection               | 0.020  | 0.046  | 0.006  |
| Deaths | Eastern Sub-Saharan Africa  | Both | All Ages | All causes | 2019 | Rate | LRIs and all related infections in the thorax             | KP | Drug-susceptible infection | 1.880  | 2.660  | 1.270  |
| Deaths | Eastern Sub-Saharan Africa  | Both | All Ages | All causes | 2019 | Rate | LRIs and all related infections in the thorax             | KP | No infection               | 7.010  | 8.790  | 5.570  |
| Deaths | Eastern Sub-Saharan Africa  | Both | All Ages | All causes | 2019 | Rate | Meningitis and other bacterial CNS infections             | KP | Drug-susceptible infection | 0.336  | 0.513  | 0.206  |
| Deaths | Eastern Sub-Saharan Africa  | Both | All Ages | All causes | 2019 | Rate | Meningitis and other bacterial CNS infections             | KP | No infection               | 1.220  | 1.690  | 0.873  |
| Deaths | Eastern Sub-Saharan Africa  | Both | All Ages | All causes | 2019 | Rate | Peritoneal and intra-abdominal infections                 | KP | Drug-susceptible infection | 0.509  | 0.823  | 0.287  |
| Deaths | Eastern Sub-Saharan Africa  | Both | All Ages | All causes | 2019 | Rate | Peritoneal and intra-abdominal infections                 | KP | No infection               | 1.860  | 2.770  | 1.190  |
| Deaths | Eastern Sub-Saharan Africa  | Both | All Ages | All causes | 2019 | Rate | Urinary tract infections and pyelonephritis               | KP | Drug-susceptible infection | 0.029  | 0.046  | 0.016  |
| Deaths | Eastern Sub-Saharan Africa  | Both | All Ages | All causes | 2019 | Rate | Urinary tract infections and pyelonephritis               | KP | No infection               | 0.105  | 0.156  | 0.057  |
| Deaths | Southern Sub-Saharan Africa | Both | All Ages | All causes | 2019 | Rate | All infectious syndromes                                  | KP | Drug-susceptible infection | 3.770  | 5.540  | 2.400  |
| Deaths | Southern Sub-Saharan Africa | Both | All Ages | All causes | 2019 | Rate | All infectious syndromes                                  | KP | No infection               | 13.736 | 17.766 | 10.505 |
| Deaths | Southern Sub-Saharan Africa | Both | All Ages | All causes | 2019 | Rate | Bacterial infections of the skin and subcutaneous systems | KP | Drug-susceptible infection | 0.029  | 0.113  | 0.004  |
| Deaths | Southern Sub-Saharan Africa | Both | All Ages | All causes | 2019 | Rate | Bacterial infections of the skin and subcutaneous systems | KP | No infection               | 0.106  | 0.407  | 0.012  |
| Deaths | Southern Sub-Saharan Africa | Both | All Ages | All causes | 2019 | Rate | Bloodstream infections                                    | KP | Drug-susceptible infection | 1.320  | 2.110  | 0.762  |
| Deaths | Southern Sub-Saharan Africa | Both | All Ages | All causes | 2019 | Rate | Bloodstream infections                                    | KP | No infection               | 4.770  | 7.030  | 3.110  |
| Deaths | Southern Sub-Saharan Africa | Both | All Ages | All causes | 2019 | Rate | Endocarditis and other cardiac infections                 | KP | Drug-susceptible infection | 0.032  | 0.048  | 0.020  |
| Deaths | Southern Sub-Saharan Africa | Both | All Ages | All causes | 2019 | Rate | Endocarditis and other cardiac infections                 | KP | No infection               | 0.115  | 0.160  | 0.084  |
| Deaths | Southern Sub-Saharan Africa | Both | All Ages | All causes | 2019 | Rate | Infections of bones, joints, and related organs           | KP | Drug-susceptible infection | 0.006  | 0.016  | 0.002  |
| Deaths | Southern Sub-Saharan Africa | Both | All Ages | All causes | 2019 | Rate | Infections of bones, joints, and related organs           | KP | No infection               | 0.022  | 0.051  | 0.006  |
| Deaths | Southern Sub-Saharan Africa | Both | All Ages | All causes | 2019 | Rate | LRIs and all related infections in the thorax             | KP | Drug-susceptible infection | 1.750  | 2.490  | 1.170  |
| Deaths | Southern Sub-Saharan Africa | Both | All Ages | All causes | 2019 | Rate | LRIs and all related infections in the thorax             | KP | No infection               | 6.410  | 7.850  | 5.260  |

|        |                             |      |          |            |      |      |                                                           |    |                            |        |        |        |
|--------|-----------------------------|------|----------|------------|------|------|-----------------------------------------------------------|----|----------------------------|--------|--------|--------|
| Deaths | Southern Sub-Saharan Africa | Both | All Ages | All causes | 2019 | Rate | Meningitis and other bacterial CNS infections             | KP | Drug-susceptible infection | 0.147  | 0.216  | 0.091  |
| Deaths | Southern Sub-Saharan Africa | Both | All Ages | All causes | 2019 | Rate | Meningitis and other bacterial CNS infections             | KP | No infection               | 0.540  | 0.723  | 0.399  |
| Deaths | Southern Sub-Saharan Africa | Both | All Ages | All causes | 2019 | Rate | Peritoneal and intra-abdominal infections                 | KP | Drug-susceptible infection | 0.442  | 0.723  | 0.247  |
| Deaths | Southern Sub-Saharan Africa | Both | All Ages | All causes | 2019 | Rate | Peritoneal and intra-abdominal infections                 | KP | No infection               | 1.600  | 2.420  | 1.040  |
| Deaths | Southern Sub-Saharan Africa | Both | All Ages | All causes | 2019 | Rate | Urinary tract infections and pyelonephritis               | KP | Drug-susceptible infection | 0.047  | 0.080  | 0.024  |
| Deaths | Southern Sub-Saharan Africa | Both | All Ages | All causes | 2019 | Rate | Urinary tract infections and pyelonephritis               | KP | No infection               | 0.170  | 0.271  | 0.095  |
| Deaths | Western Sub-Saharan Africa  | Both | All Ages | All causes | 2019 | Rate | All infectious syndromes                                  | KP | Drug-susceptible infection | 5.650  | 8.080  | 3.790  |
| Deaths | Western Sub-Saharan Africa  | Both | All Ages | All causes | 2019 | Rate | All infectious syndromes                                  | KP | No infection               | 20.490 | 26.312 | 15.720 |
| Deaths | Western Sub-Saharan Africa  | Both | All Ages | All causes | 2019 | Rate | Bacterial infections of the skin and subcutaneous systems | KP | Drug-susceptible infection | 0.019  | 0.076  | 0.002  |
| Deaths | Western Sub-Saharan Africa  | Both | All Ages | All causes | 2019 | Rate | Bacterial infections of the skin and subcutaneous systems | KP | No infection               | 0.069  | 0.273  | 0.006  |
| Deaths | Western Sub-Saharan Africa  | Both | All Ages | All causes | 2019 | Rate | Bloodstream infections                                    | KP | Drug-susceptible infection | 1.570  | 2.410  | 0.934  |
| Deaths | Western Sub-Saharan Africa  | Both | All Ages | All causes | 2019 | Rate | Bloodstream infections                                    | KP | No infection               | 5.700  | 8.260  | 3.760  |
| Deaths | Western Sub-Saharan Africa  | Both | All Ages | All causes | 2019 | Rate | Endocarditis and other cardiac infections                 | KP | Drug-susceptible infection | 0.019  | 0.029  | 0.013  |
| Deaths | Western Sub-Saharan Africa  | Both | All Ages | All causes | 2019 | Rate | Endocarditis and other cardiac infections                 | KP | No infection               | 0.071  | 0.096  | 0.054  |
| Deaths | Western Sub-Saharan Africa  | Both | All Ages | All causes | 2019 | Rate | Infections of bones, joints, and related organs           | KP | Drug-susceptible infection | 0.005  | 0.013  | 0.001  |
| Deaths | Western Sub-Saharan Africa  | Both | All Ages | All causes | 2019 | Rate | Infections of bones, joints, and related organs           | KP | No infection               | 0.019  | 0.044  | 0.005  |
| Deaths | Western Sub-Saharan Africa  | Both | All Ages | All causes | 2019 | Rate | LRIs and all related infections in the thorax             | KP | Drug-susceptible infection | 2.810  | 3.890  | 1.900  |
| Deaths | Western Sub-Saharan Africa  | Both | All Ages | All causes | 2019 | Rate | LRIs and all related infections in the thorax             | KP | No infection               | 10.170 | 12.744 | 8.030  |
| Deaths | Western Sub-Saharan Africa  | Both | All Ages | All causes | 2019 | Rate | Meningitis and other bacterial CNS infections             | KP | Drug-susceptible infection | 0.720  | 1.200  | 0.404  |
| Deaths | Western Sub-Saharan Africa  | Both | All Ages | All causes | 2019 | Rate | Meningitis and other bacterial CNS infections             | KP | No infection               | 2.590  | 3.900  | 1.680  |
| Deaths | Western Sub-Saharan Africa  | Both | All Ages | All causes | 2019 | Rate | Peritoneal and intra-abdominal infections                 | KP | Drug-susceptible infection | 0.488  | 0.808  | 0.257  |
| Deaths | Western Sub-Saharan Africa  | Both | All Ages | All causes | 2019 | Rate | Peritoneal and intra-abdominal infections                 | KP | No infection               | 1.770  | 2.750  | 1.060  |
| Deaths | Western Sub-Saharan Africa  | Both | All Ages | All causes | 2019 | Rate | Urinary tract infections and pyelonephritis               | KP | Drug-susceptible infection | 0.029  | 0.045  | 0.017  |
| Deaths | Western Sub-Saharan Africa  | Both | All Ages | All causes | 2019 | Rate | Urinary tract infections and pyelonephritis               | KP | No infection               | 0.104  | 0.151  | 0.066  |
