# Supplementary material for: Global burden of Klebsiella pneumoniae infections and antimicrobial resistance in 2019
Source: Research Square preprint supplement (doi:10.21203/rs.3.rs-4057357/v1), 2024-03-21
Supplement: Supplementary file 2 [file de3e1ef98cdaf3b6aa045318.pdf]

Figure S1 Deaths associated with and attributable to KP-AMR in 21 GBD regions, by infectious syndrome, 2019

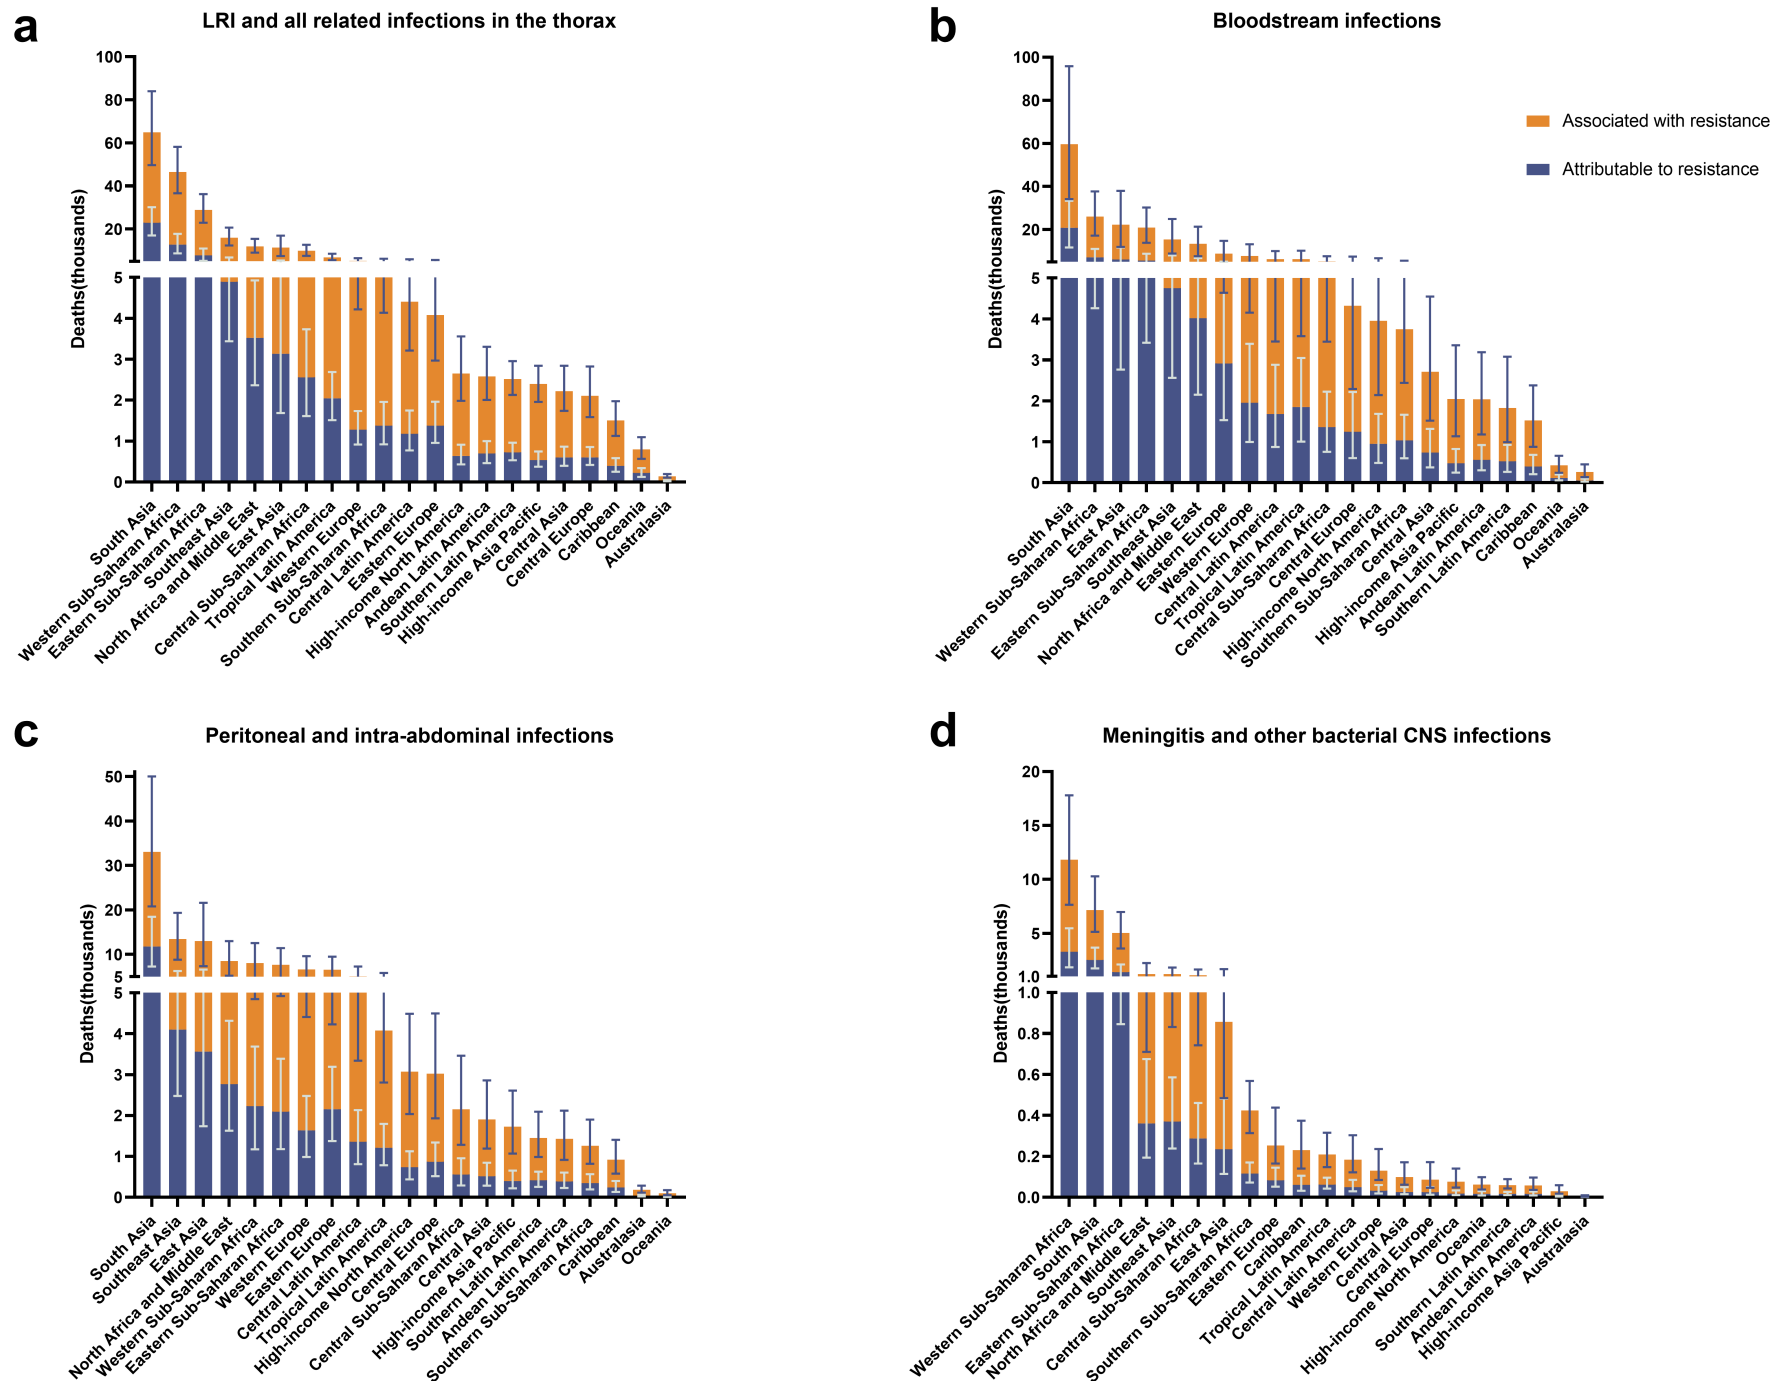

**e**

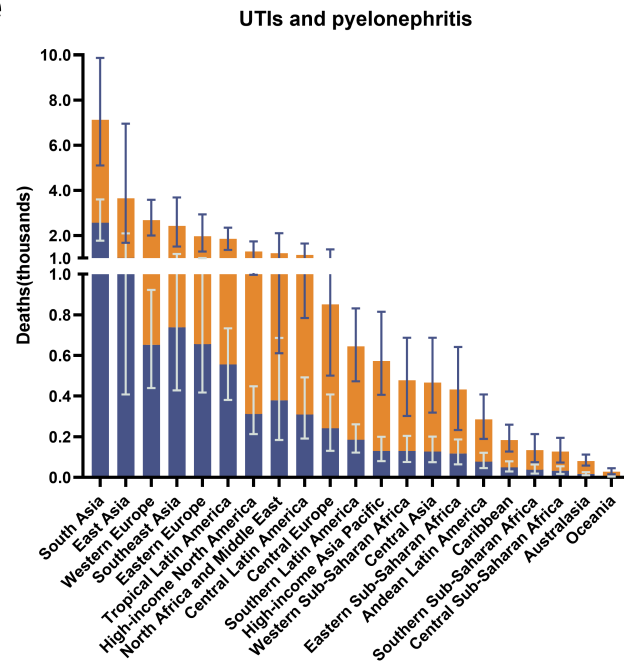

**f**

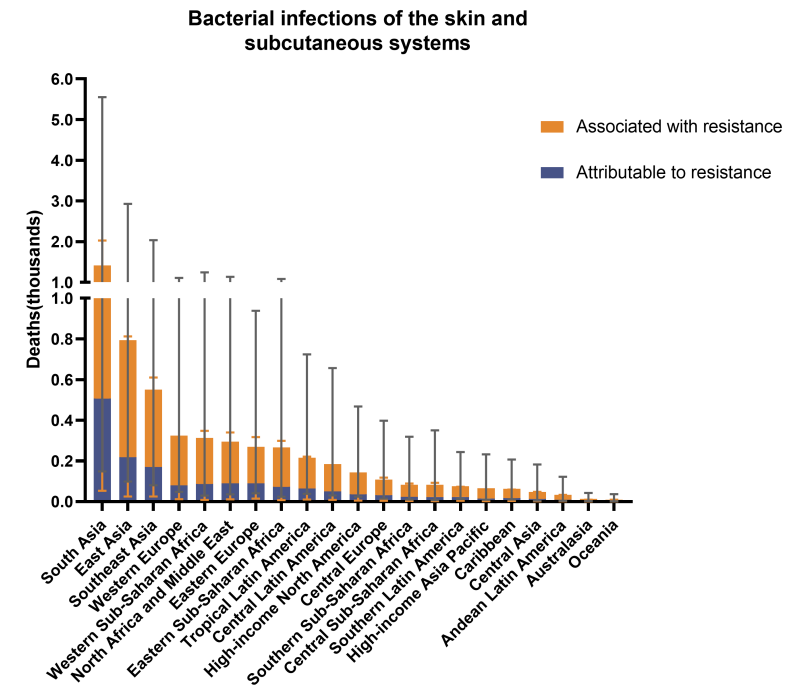

**g**

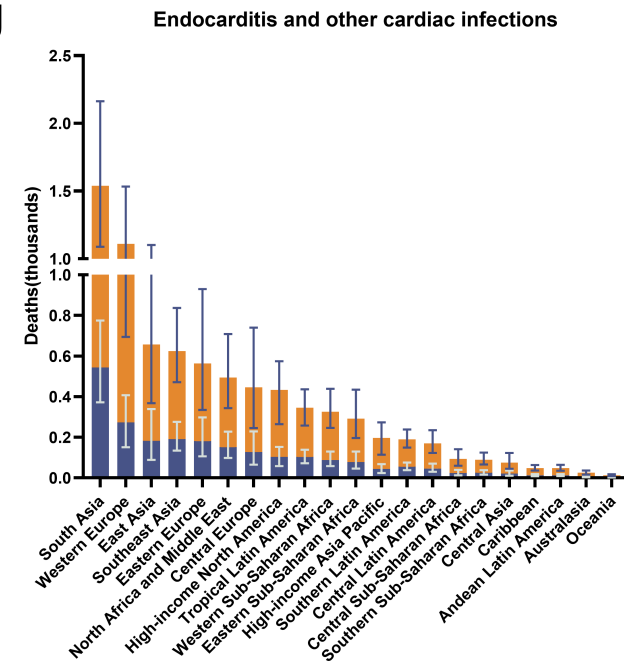

**h**

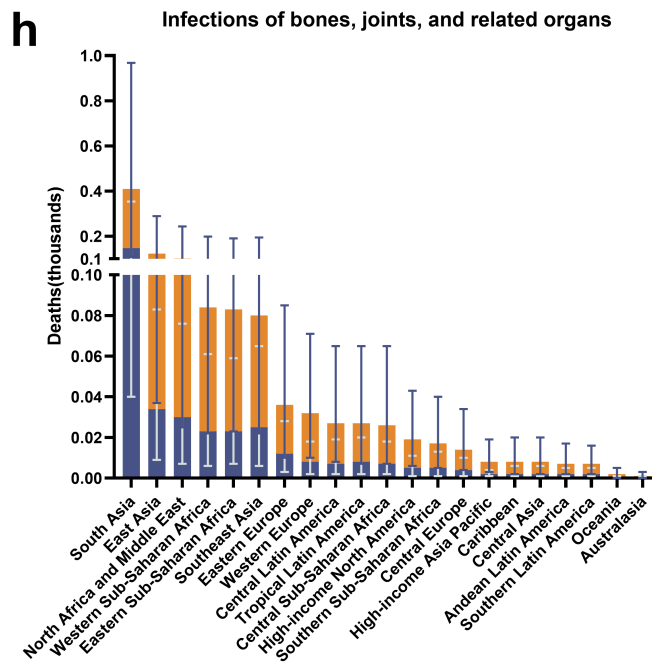

Figure S2 Mortality rates at all ages linked to KP-AMR in 21 GBD regions stratified by infectious syndrome in 2019

**a**

**LRI and all related infections in the thorax**

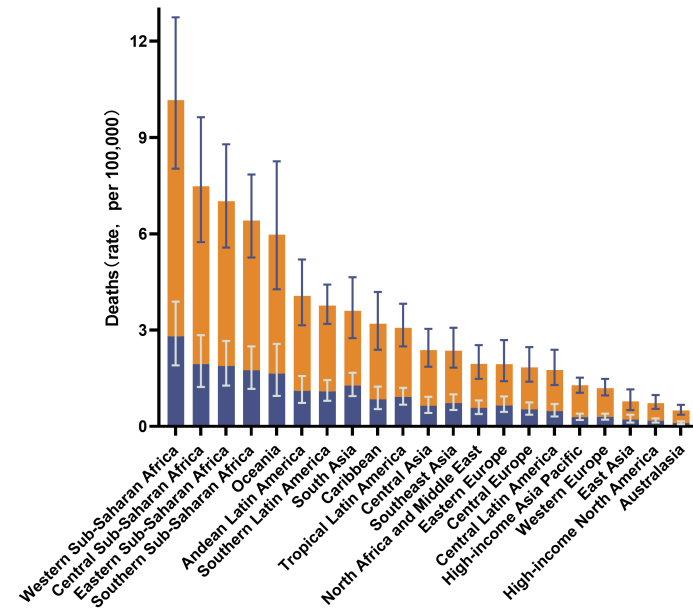

**b**

**Bloodstream infections**

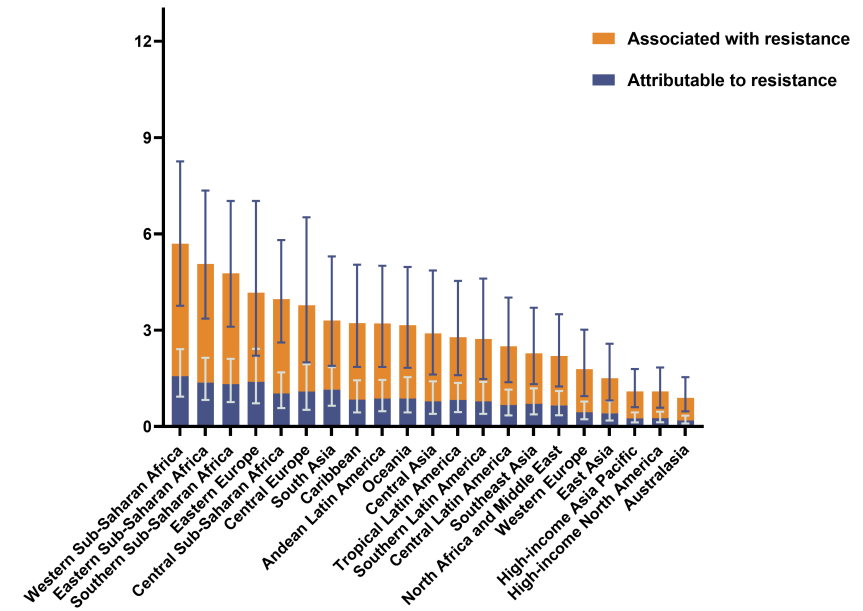

**c**

**Peritoneal and intra-abdominal infections**

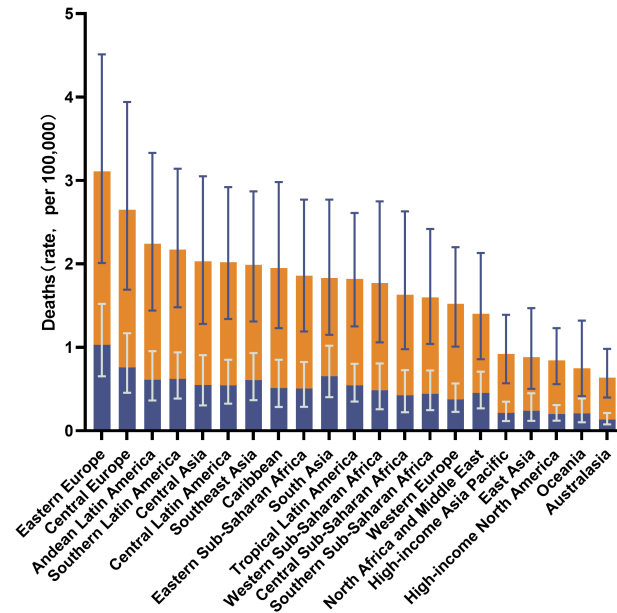

**d**

**Meningitis and other bacterial CNS infections**

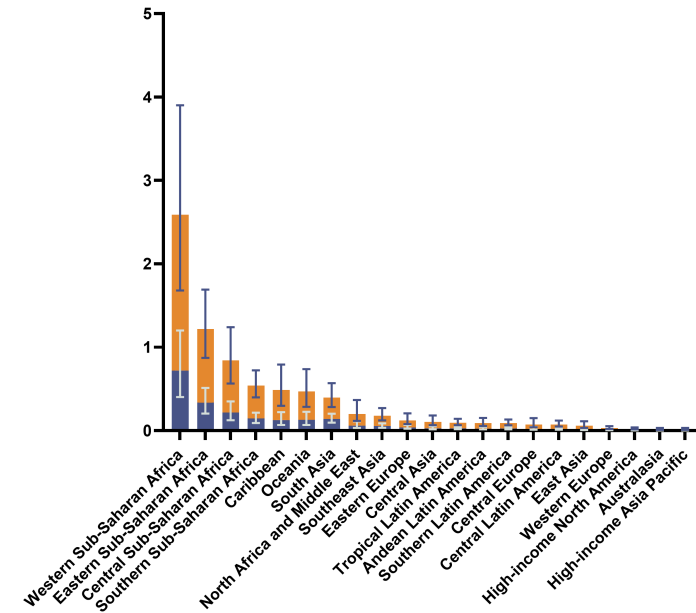

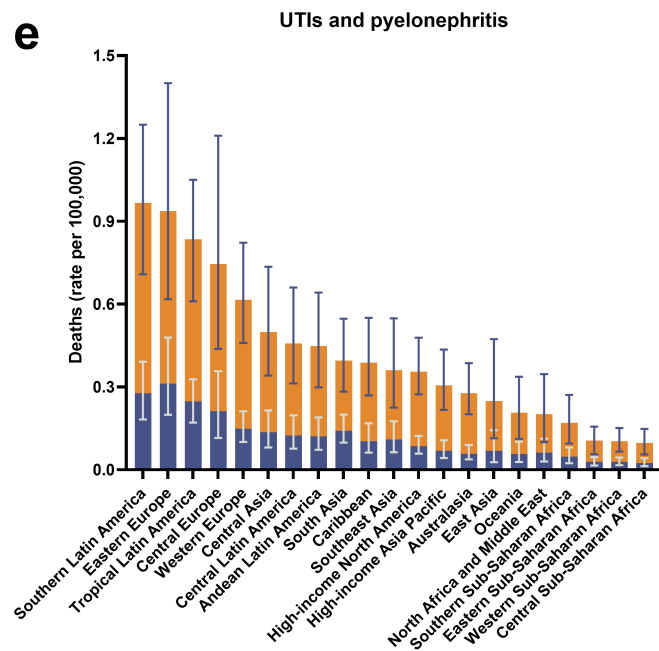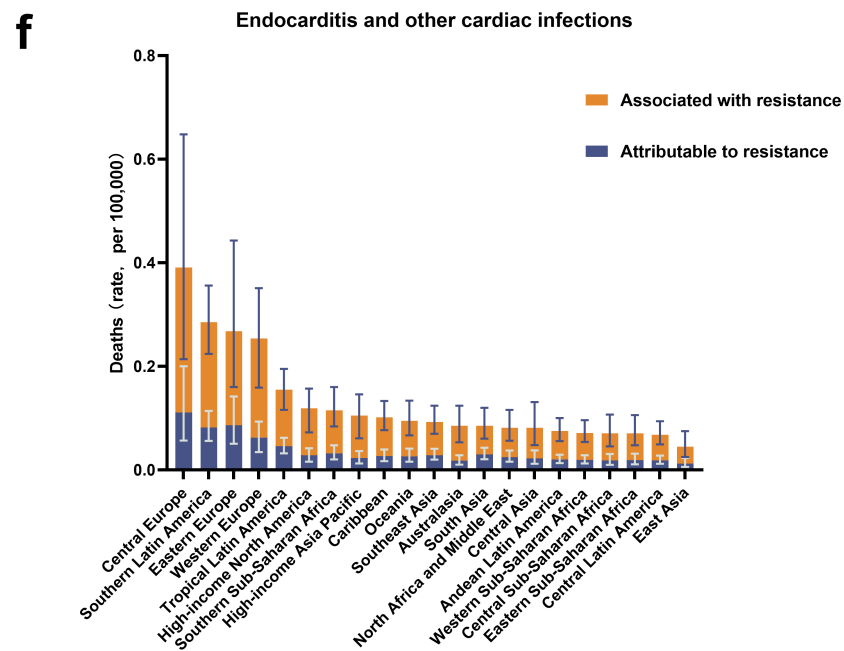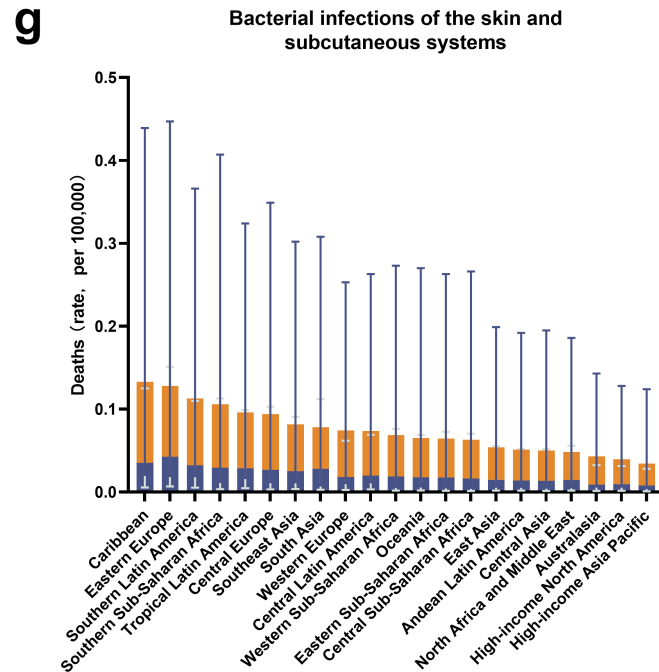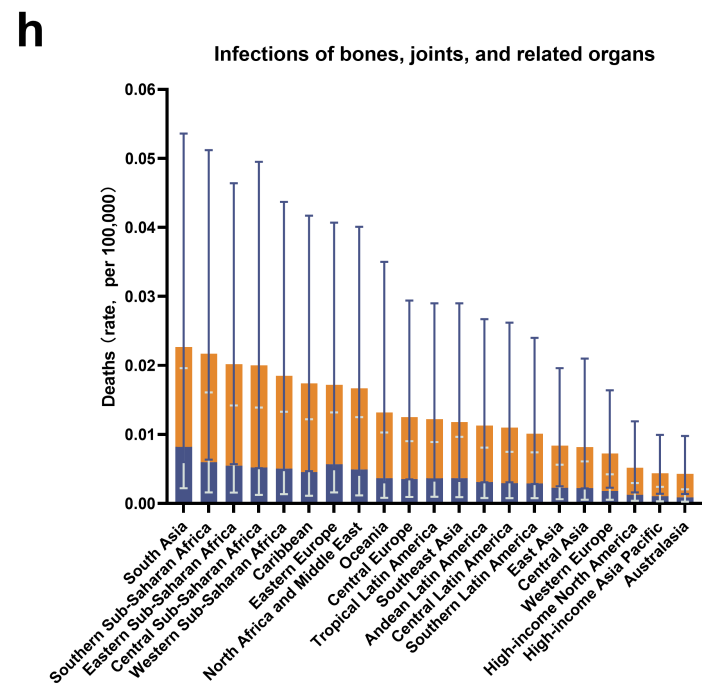

Table S1 Age-standardised mortality rates associated with KP infection in GBD regions, by infectious syndrome, 2019

|                              | All 8 infectious syndromes | LRIs and all related infections in the thorax | Bloodstream infections | Peritoneal and intra-abdominal infections | UTIs and pyelonephritis | Meningitis and other bacterial CNS infections | Endocarditis and other cardiac infections | Bacterial infections of the skin and subcutaneous systems | Infections of bones, joints, and related organs |
|------------------------------|----------------------------|-----------------------------------------------|------------------------|-------------------------------------------|-------------------------|-----------------------------------------------|-------------------------------------------|-----------------------------------------------------------|-------------------------------------------------|
| Global                       | 10.60<br>(7.69-14.20)      | 3.85<br>(3.07-4.77)                           | 3.54<br>(2.12-5.53)    | 1.99<br>(1.30-2.94)                       | 0.51<br>(0.36-0.73)     | 0.46<br>(0.33-0.65)                           | 0.15<br>(0.11-0.20)                       | 0.09<br>(0.01-0.33)                                       | 0.02<br>(0.01-0.04)                             |
| East Asia                    | 4.37<br>(2.82-6.63)        | 1.08<br>(0.77-1.50)                           | 1.78<br>(0.98-2.99)    | 1.00<br>(0.59-1.63)                       | 0.30<br>(0.15-0.55)     | 0.08<br>(0.05-0.14)                           | 0.05<br>(0.03-0.09)                       | 0.06<br>(0.01-0.23)                                       | 0.01<br>(0.00-0.02)                             |
| Southeast Asia               | 12.44<br>(8.82-17.06)      | 4.22<br>(3.28-5.43)                           | 3.80<br>(2.17-6.17)    | 3.20<br>(2.10-4.61)                       | 0.63<br>(0.39-0.96)     | 0.26<br>(0.18-0.39)                           | 0.15<br>(0.12-0.21)                       | 0.14<br>(0.02-0.53)                                       | 0.02<br>(0.01-0.05)                             |
| Oceania                      | 21.16<br>(14.54-29.62)     | 10.46<br>(7.36-14.32)                         | 6.88<br>(3.68-11.42)   | 2.08<br>(1.19-3.46)                       | 0.69<br>(0.38-1.12)     | 0.56<br>(0.36-0.85)                           | 0.26<br>(0.18-0.35)                       | 0.20<br>(0.02-0.85)                                       | 0.04<br>(0.01-0.10)                             |
| Central Asia                 | 12.30<br>(8.29-17.66)      | 3.43<br>(2.64-4.51)                           | 4.66<br>(2.50-7.93)    | 3.02<br>(1.90-4.53)                       | 0.83<br>(0.54-1.25)     | 0.12<br>(0.08-0.22)                           | 0.13<br>(0.08-0.22)                       | 0.09<br>(0.01-0.34)                                       | 0.01<br>(0.00-0.03)                             |
| Central Europe               | 6.19<br>(3.95-9.25)        | 1.21<br>(0.91-1.62)                           | 2.43<br>(1.27-4.18)    | 1.71<br>(1.09-2.56)                       | 0.45<br>(0.27-0.74)     | 0.07<br>(0.04-0.13)                           | 0.25<br>(0.14-0.42)                       | 0.06<br>(0.01-0.21)                                       | 0.01<br>(0.00-0.02)                             |
| Eastern Europe               | 7.47<br>(4.84-10.80)       | 1.40<br>(1.04-1.90)                           | 2.92<br>(1.58-4.90)    | 2.14<br>(1.36-3.13)                       | 0.61<br>(0.41-0.92)     | 0.11<br>(0.07-0.19)                           | 0.19<br>(0.12-0.31)                       | 0.09<br>(0.01-0.29)                                       | 0.01<br>(0.00-0.03)                             |
| High-income Asia Pacific     | 3.84<br>(2.78-5.22)        | 1.20<br>(1.00-1.39)                           | 1.23<br>(0.70-1.96)    | 0.96<br>(0.60-1.46)                       | 0.28<br>(0.20-0.40)     | 0.02<br>(0.01-0.04)                           | 0.11<br>(0.06-0.15)                       | 0.03<br>(0.01-0.12)                                       | 0.00<br>(0.00-0.01)                             |
| Australasia                  | 3.48<br>(2.34-4.99)        | 0.65<br>(0.49-0.88)                           | 1.32<br>(0.71-2.18)    | 0.92<br>(0.58-1.38)                       | 0.37<br>(0.28-0.51)     | 0.04<br>(0.02-0.07)                           | 0.12<br>(0.08-0.17)                       | 0.06<br>(0.01-0.19)                                       | 0.01<br>(0.00-0.01)                             |
| Western Europe               | 4.36<br>(3.04-6.13)        | 0.87<br>(0.70-1.09)                           | 1.52<br>(0.81-2.54)    | 1.22<br>(0.81-1.77)                       | 0.44<br>(0.33-0.60)     | 0.04<br>(0.02-0.07)                           | 0.20<br>(0.13-0.27)                       | 0.06<br>(0.01-0.19)                                       | 0.01<br>(0.00-0.01)                             |
| Southern Latin America       | 10.78<br>(8.13-14.11)      | 4.00<br>(3.39-4.72)                           | 2.99<br>(1.65-4.99)    | 2.27<br>(1.52-3.27)                       | 0.99<br>(0.73-1.27)     | 0.11<br>(0.08-0.16)                           | 0.30<br>(0.24-0.37)                       | 0.12<br>(0.02-0.37)                                       | 0.01<br>(0.00-0.03)                             |
| High-income North America    | 5.16<br>(3.53-7.35)        | 1.13<br>(0.84-1.52)                           | 1.82<br>(0.99-3.03)    | 1.38<br>(0.90-2.01)                       | 0.53<br>(0.41-0.71)     | 0.05<br>(0.03-0.08)                           | 0.19<br>(0.12-0.25)                       | 0.06<br>(0.01-0.20)                                       | 0.01<br>(0.00-0.02)                             |
| Caribbean                    | 11.10<br>(7.71-15.55)      | 3.84<br>(2.86-4.96)                           | 3.77<br>(2.24-5.86)    | 2.16<br>(1.37-3.28)                       | 0.44<br>(0.30-0.63)     | 0.62<br>(0.38-1.00)                           | 0.11<br>(0.09-0.15)                       | 0.15<br>(0.02-0.50)                                       | 0.02<br>(0.01-0.05)                             |
| Andean Latin America         | 12.67<br>(8.93-17.40)      | 5.09<br>(3.98-6.52)                           | 3.92<br>(2.25-6.21)    | 2.82<br>(1.81-4.20)                       | 0.58<br>(0.38-0.82)     | 0.10<br>(0.06-0.18)                           | 0.09<br>(0.07-0.12)                       | 0.07<br>(0.01-0.24)                                       | 0.01<br>(0.00-0.03)                             |
| Central Latin America        | 10.30<br>(6.97-14.47)      | 2.60<br>(1.89-3.47)                           | 3.72<br>(2.07-5.98)    | 2.96<br>(1.94-4.25)                       | 0.69<br>(0.48-0.99)     | 0.10<br>(0.07-0.17)                           | 0.10<br>(0.07-0.14)                       | 0.11<br>(0.02-0.38)                                       | 0.02<br>(0.00-0.04)                             |
| Tropical Latin America       | 11.62<br>(8.58-15.55)      | 4.06<br>(3.29-5.06)                           | 3.76<br>(2.19-6.09)    | 2.26<br>(1.55-3.22)                       | 1.08<br>(0.79-1.34)     | 0.13<br>(0.09-0.19)                           | 0.19<br>(0.14-0.24)                       | 0.12<br>(0.02-0.40)                                       | 0.02<br>(0.00-0.04)                             |
| North Africa and Middle East | 10.34<br>(7.02-14.93)      | 3.14<br>(2.38-4.10)                           | 3.73<br>(2.09-6.04)    | 2.54<br>(1.60-3.85)                       | 0.40<br>(0.21-0.68)     | 0.26<br>(0.15-0.48)                           | 0.14<br>(0.10-0.21)                       | 0.09<br>(0.01-0.36)                                       | 0.03<br>(0.01-0.07)                             |
| South Asia                   | 14.50<br>(10.17-20.04)     | 5.27<br>(3.97-6.88)                           | 5.00<br>(2.81-8.20)    | 2.78<br>(1.77-4.21)                       | 0.65<br>(0.46-0.91)     | 0.49<br>(0.35-0.72)                           | 0.14<br>(0.10-0.19)                       | 0.13<br>(0.01-0.54)                                       | 0.04<br>(0.01-0.09)                             |
| Central Sub-Saharan Africa   | 27.40<br>(20.22-36.7)      | 13.67<br>(10.34-17.61)                        | 7.03<br>(4.05-11.38)   | 4.83<br>(2.98-7.45)                       | 0.32<br>(0.19-0.49)     | 1.06<br>(0.72-1.53)                           | 0.20<br>(0.13-0.31)                       | 0.22<br>(0.02-1.00)                                       | 0.05<br>(0.01-0.13)                             |
| Eastern Sub-Saharan Africa   | 27.40<br>(21.07-34.97)     | 11.82<br>(9.63-14.37)                         | 7.60<br>(4.61-11.91)   | 5.56<br>(3.65-8.05)                       | 0.34<br>(0.18-0.49)     | 1.63<br>(1.17-2.19)                           | 0.19<br>(0.12-0.29)                       | 0.21<br>(0.02-0.97)                                       | 0.06<br>(0.02-0.13)                             |
| Southern Sub-Saharan Africa  | 21.18<br>(16.21-27.38)     | 9.75<br>(7.98-11.86)                          | 7.24<br>(4.55-10.93)   | 2.74<br>(1.81-4.05)                       | 0.32<br>(0.18-0.51)     | 0.69<br>(0.52-0.92)                           | 0.20<br>(0.14-0.29)                       | 0.20<br>(0.02-0.78)                                       | 0.04<br>(0.01-0.08)                             |
| Western Sub-Saharan Africa   | 27.95<br>(21.37-36.43)     | 12.33<br>(10.04-15.08)                        | 7.71<br>(4.70-11.99)   | 4.72<br>(2.93-7.11)                       | 0.31<br>(0.19-0.45)     | 2.50<br>(1.67-3.70)                           | 0.14<br>(0.10-0.18)                       | 0.21<br>(0.02-0.92)                                       | 0.05<br>(0.01-0.11)                             |

KP=Klebsiella pneumoniae. LRIs=Lower respiratory infections. UTIs=Urinary tract infections. CNS=central nervous system. GBD=Global Burden of Diseases, Injuries, and Risk Factors Study.

| Table S2 Deaths for infectious syndromes associated with and attributable to KP-AMR, by pathogen-drug combination, 2019 |                           |                        |                                       |                      |                           |                        |                           |                        |                                 |                        |                               |                        |
|-------------------------------------------------------------------------------------------------------------------------|---------------------------|------------------------|---------------------------------------|----------------------|---------------------------|------------------------|---------------------------|------------------------|---------------------------------|------------------------|-------------------------------|------------------------|
|                                                                                                                         | Aminoglycosides           |                        | Beta Lactam/Beta-lactamase inhibitors |                      | Carbapenems               |                        | Fluoroquinolones          |                        | Third-generation cephalosporins |                        | Trimethoprim-Sulfamethoxazole |                        |
|                                                                                                                         | AWR                       | ATR                    | AWR                                   | ATR                  | AWR                       | ATR                    | AWR                       | ATR                    | AWR                             | ATR                    | AWR                           | ATR                    |
| Global                                                                                                                  | 345457<br>(253863-463161) | 26343<br>(16213-38879) | 544713<br>(396427-724808)             | 7933<br>(4586-12068) | 234168<br>(164262-331603) | 55666<br>(36284-81337) | 425750<br>(311649-575889) | 29023<br>(17450-44078) | 526235<br>(383648-716646)       | 50141<br>(18971-94411) | 487640<br>(356201-653339)     | 23485<br>(11522-39671) |
| East Asia                                                                                                               | 5362<br>(3091-8845)       | 594<br>(316-1021)      | 27209<br>(17008-42625)                | 291<br>(15-1088)     | 12425<br>(1901-37159)     | 3322<br>(660-10434)    | 25052<br>(15808-38881)    | 2000<br>(1113-3286)    | 40102<br>(16142-76536)          | 5639<br>(917-14554)    | 41344<br>(25596-63495)        | 2635<br>(1167-4925)    |
| Southeast Asia                                                                                                          | 9764<br>(6542-14231)      | 908<br>(543-1392)      | 37355<br>(26079-51843)                | 320<br>(151-563)     | 18238<br>(12571-26187)    | 4679<br>(3052-7043)    | 31439<br>(22207-44413)    | 2463<br>(1465-3779)    | 44118<br>(30964-60645)          | 5173<br>(2017-9539)    | 31989<br>(22319-44585)        | 1698<br>(808-2886)     |
| Oceania                                                                                                                 | 596<br>(367-904)          | 47<br>(26-74)          | 1015<br>(710-1415)                    | 14<br>(2-43)         | 150<br>(37-485)           | 39<br>(13-110)         | 932<br>(638-1304)         | 68<br>(39-108)         | 1233<br>(642-1881)              | 185<br>(49-374)        | 861<br>(588-1238)             | 42<br>(19-75)          |
| Central Asia                                                                                                            | 2891<br>(1934-4313)       | 221<br>(130-351)       | 6220<br>(4256-8818)                   | 87<br>(26-186)       | 943<br>(415-1904)         | 231<br>(108-453)       | 4227<br>(2896-6039)       | 289<br>(169-459)       | 6229<br>(4029-9275)             | 885<br>(312-1696)      | 6231<br>(4248-8948)           | 328<br>(156-572)       |
| Central Europe                                                                                                          | 6215<br>(4052-9402)       | 470<br>(271-764)       | 9847<br>(6390-14679)                  | 168<br>(88-275)      | 2846<br>(1750-4396)       | 624<br>(353-1033)      | 8125<br>(5264-11996)      | 552<br>(313-891)       | 962<br>(5786-13599)             | 962<br>(347-1884)      | 8036<br>(5169-12000)          | 368<br>(172-674)       |
| Eastern Europe                                                                                                          | 14822<br>(9517-22439)     | 1107<br>(622-1796)     | 21323<br>(13889-30695)                | 196<br>(79-389)      | 13378<br>(8522-19782)     | 2946<br>(1732-4587)    | 18297<br>(11952-26536)    | 1222<br>(695-1930)     | 19921<br>(12972-28766)          | 1142<br>(355-2449)     | 19139<br>(12473-27993)        | 848<br>(389-1531)      |
| High-income Asia Pacific                                                                                                | 1292<br>(909-1794)        | 129<br>(76-199)        | 5507<br>(3977-7535)                   | 313<br>(185-487)     | 245<br>(109-499)          | 113<br>(53-200)        | 2025<br>(1461-2812)       | 173<br>(103-266)       | 3848<br>(2716-5425)             | 649<br>(265-1215)      | 3411<br>(2497-4539)           | 233<br>(114-390)       |
| Australasia                                                                                                             | 124<br>(77-188)           | 13<br>(7-21)           | 434<br>(290-636)                      | 26<br>(11-45)        | 78<br>(15-254)            | 25<br>(8-79)           | 145<br>(91-217)           | 13<br>(7-21)           | 227<br>(85-447)                 | 33<br>(8-85)           | 514<br>(339-774)              | 40<br>(18-74)          |
| Western Europe                                                                                                          | 8642<br>(5981-12111)      | 705<br>(424-1113)      | 19190<br>(13439-26570)                | 850<br>(484-1320)    | 3559<br>(2107-5744)       | 907<br>(498-1530)      | 13247<br>(9318-18330)     | 981<br>(576-1534)      | 13907<br>(9810-19650)           | 1660<br>(615-3297)     | 14407<br>(10261-20143)        | 814<br>(399-1411)      |
| Southern Latin America                                                                                                  | 2839<br>(2061-3975)       | 225<br>(137-338)       | 5542<br>(4162-7318)                   | 102<br>(56-164)      | 1779<br>(1146-2651)       | 392<br>(241-606)       | 4611<br>(3463-6227)       | 337<br>(206-498)       | 5635<br>(4207-7468)             | 665<br>(255-1250)      | 4475<br>(3369-5930)           | 223<br>(111-374)       |
| High-income North America                                                                                               | 3756<br>(2580-5407)       | 324<br>(193-520)       | 8611<br>(5933-12111)                  | 447<br>(253-699)     | 1565<br>(722-2757)        | 434<br>(216-741)       | 4973<br>(3457-7116)       | 391<br>(229-626)       | 6261<br>(4143-9180)             | 795<br>(278-1615)      | 6354<br>(4347-9006)           | 410<br>(197-721)       |
| Caribbean                                                                                                               | 1953<br>(1335-2767)       | 145<br>(85-226)        | 3809<br>(2612-5396)                   | 84<br>(34-167)       | 348<br>(122-874)          | 92<br>(39-205)         | 2664<br>(1823-3741)       | 179<br>(102-282)       | 3450<br>(2235-5100)             | 503<br>(192-968)       | 3471<br>(2386-4857)           | 171<br>(83-296)        |
| Andean Latin America                                                                                                    | 4492<br>(3125-6237)       | 332<br>(198-503)       | 5968<br>(4169-8252)                   | 111<br>(37-223)      | 980<br>(355-1951)         | 231<br>(86-474)        | 4090<br>(2810-5643)       | 253<br>(145-393)       | 4975<br>(3227-7220)             | 570<br>(186-1162)      | 5756<br>(4039-7908)           | 262<br>(128-442)       |
| Central Latin America                                                                                                   | 5194<br>(3324-7641)       | 443<br>(258-708)       | 14375<br>(9697-20165)                 | 394<br>(146-783)     | 2829<br>(1475-5043)       | 722<br>(361-1328)      | 7541<br>(5004-10689)      | 567<br>(324-892)       | 13185<br>(7907-19998)           | 1914<br>(655-3793)     | 11561<br>(7859-16469)         | 635<br>(308-1114)      |
| Tropical Latin America                                                                                                  | 10159<br>(7161-14428)     | 793<br>(467-1240)      | 17268<br>(12566-23115)                | 458<br>(213-807)     | 9074<br>(6020-12850)      | 2010<br>(1210-2997)    | 13920<br>(10220-19003)    | 1019<br>(619-1547)     | 13553<br>(7877-20182)           | 1011<br>(267-2310)     | 12663<br>(9268-17207)         | 611<br>(299-1029)      |
| North Africa and Middle East                                                                                            | 14816<br>(9902-21407)     | 1172<br>(698-1839)     | 32447<br>(21742-46484)                | 383<br>(174-738)     | 13257<br>(8231-19611)     | 3131<br>(1802-4870)    | 22212<br>(14580-31943)    | 1588<br>(920-2539)     | 32728<br>(21692-47324)          | 3680<br>(1385-6964)    | 27309<br>(18418-39132)        | 1362<br>(640-2389)     |
| South Asia                                                                                                              | 123193<br>(86253-171695)  | 9481<br>(5740-14162)   | 156409<br>(110444-215304)             | 1472<br>(778-2359)   | 131869<br>(91777-186662)  | 31195<br>(20203-47306) | 133907<br>(94073-186081)  | 9047<br>(5344-13929)   | 151832<br>(106293-212519)       | 5582<br>(1896-11434)   | 117779<br>(83320-163419)      | 5016<br>(2354-8698)    |
| Central Sub-Saharan Africa                                                                                              | 13308<br>(9725-17631)     | 946<br>(577-1419)      | 16803<br>(12699-22009)                | 270<br>(51-654)      | 490<br>(96-1675)          | 164<br>(59-403)        | 12731<br>(9548-16680)     | 772<br>(459-1186)      | 14973<br>(9179-21256)           | 1948<br>(677-3738)     | 16664<br>(12509-21764)        | 750<br>(363-1233)      |
| Eastern Sub-Saharan Africa                                                                                              | 46428<br>(35559-60302)    | 3361<br>(2133-4983)    | 58897<br>(45162-75681)                | 843<br>(427-1388)    | 6470<br>(4370-9280)       | 1411<br>(867-2141)     | 40382<br>(30785-52322)    | 2454<br>(1489-3689)    | 52482<br>(39872-68983)          | 6559<br>(2565-12110)   | 57109<br>(43926-73595)        | 2554<br>(1259-4147)    |
| Southern Sub-Saharan Africa                                                                                             | 1980<br>(1393-2760)       | 165<br>(99-245)        | 9026<br>(6874-11800)                  | 89<br>(19-199)       | 1308<br>(973-1793)        | 353<br>(235-507)       | 4315<br>(3239-5710)       | 320<br>(198-478)       | 9444<br>(7066-12500)            | 1485<br>(595-2655)     | 9595<br>(7331-12380)          | 554<br>(281-899)       |
| Western Sub-Saharan Africa                                                                                              | 67603<br>(51099-87913)    | 4761<br>(2993-6931)    | 87475<br>(66654-112165)               | 1016<br>(532-1680)   | 12271<br>(3920-27160)     | 2631<br>(989-5789)     | 70921<br>(54060-91434)    | 4336<br>(2611-6604)    | 79184<br>(60561-103223)         | 9115<br>(3340-16778)   | 88982<br>(68183-114129)       | 3932<br>(1896-6399)    |

95% uncertainty intervals are shown in parentheses. AWR=Associated with resistance; ATR=Attributable to resistance; AMR: antimicrobial resistance; KP=Klebsiella pnemonniae.



Table S3 All-age mortality rates for infectious syndromes linked to KP-AMR, by pathogen-drug combination, 2019

|                              | Aminoglycosides       |                     | Beta Lactam/Beta-lactamase inhibitors |                     | Carbapenems          |                     | Fluoroquinolones       |                     | Third-generation cephalosporins |                     | Trimethoprim-Sulfamethoxazole |                     |
|------------------------------|-----------------------|---------------------|---------------------------------------|---------------------|----------------------|---------------------|------------------------|---------------------|---------------------------------|---------------------|-------------------------------|---------------------|
|                              | AWR                   | ATR                 | AWR                                   | ATR                 | AWR                  | ATR                 | AWR                    | ATR                 | AWR                             | ATR                 | AWR                           | ATR                 |
| Global                       | 4.46<br>(3.28-5.99)   | 0.34<br>(0.21-0.50) | 7.04<br>(5.12-9.37)                   | 0.10<br>(0.06-0.16) | 3.03<br>(2.12-4.29)  | 0.72<br>(0.47-1.05) | 5.50<br>(4.03-7.44)    | 0.38<br>(0.23-0.57) | 6.80<br>(4.96-9.26)             | 0.65<br>(0.25-1.22) | 6.30<br>(4.60-8.44)           | 0.30<br>(0.15-0.51) |
| East Asia                    | 0.36<br>(0.21-0.60)   | 0.04<br>(0.02-0.07) | 1.85<br>(1.16-2.90)                   | 0.02<br>(0.00-0.07) | 0.84<br>(0.13-2.52)  | 0.23<br>(0.04-0.71) | 1.70<br>(1.07-2.64)    | 0.14<br>(0.08-0.22) | 2.72<br>(1.10-5.20)             | 0.38<br>(0.06-0.99) | 2.81<br>(1.74-4.31)           | 0.18<br>(0.08-0.34) |
| Southeast Asia               | 1.45<br>(0.97-2.11)   | 0.14<br>(0.08-0.21) | 5.54<br>(3.87-7.69)                   | 0.05<br>(0.02-0.08) | 2.71<br>(1.87-3.89)  | 0.69<br>(0.45-1.05) | 4.67<br>(3.30-6.59)    | 0.37<br>(0.22-0.56) | 6.55<br>(4.60-9.00)             | 0.77<br>(0.30-1.42) | 4.75<br>(3.31-6.62)           | 0.25<br>(0.12-0.43) |
| Oceania                      | 4.49<br>(2.76-6.81)   | 0.35<br>(0.20-0.56) | 7.65<br>(5.35-10.66)                  | 0.10<br>(0.01-0.32) | 1.13<br>(0.28-3.65)  | 0.29<br>(0.10-0.83) | 7.02<br>(4.81-9.82)    | 0.51<br>(0.30-0.81) | 9.29<br>(4.84-14.16)            | 1.39<br>(0.37-2.82) | 6.48<br>(4.43-9.32)           | 0.32<br>(0.15-0.57) |
| Central Asia                 | 3.09<br>(2.07-4.61)   | 0.24<br>(0.14-0.38) | 6.65<br>(4.55-9.43)                   | 0.09<br>(0.03-0.20) | 1.01<br>(0.44-2.04)  | 0.25<br>(0.12-0.48) | 4.52<br>(3.10-6.46)    | 0.31<br>(0.18-0.49) | 6.66<br>(4.31-9.92)             | 0.95<br>(0.33-1.81) | 6.66<br>(4.54-9.57)           | 0.35<br>(0.17-0.61) |
| Central Europe               | 5.44<br>(3.55-8.23)   | 0.41<br>(0.24-0.67) | 8.62<br>(5.59-12.85)                  | 0.15<br>(0.08-0.24) | 2.49<br>(1.53-3.85)  | 0.55<br>(0.31-0.90) | 7.11<br>(4.61-10.50)   | 0.48<br>(0.27-0.78) | 7.86<br>(5.07-11.91)            | 0.84<br>(0.30-1.65) | 7.04<br>(4.53-10.51)          | 0.32<br>(0.15-0.59) |
| Eastern Europe               | 7.06<br>(4.53-10.69)  | 0.53<br>(0.30-0.86) | 10.16<br>(6.61-14.62)                 | 0.09<br>(0.04-0.19) | 6.37<br>(4.06-9.42)  | 1.40<br>(0.83-2.18) | 8.71<br>(5.69-12.64)   | 0.58<br>(0.33-0.92) | 9.49<br>(6.18-13.70)            | 0.54<br>(0.17-1.17) | 9.12<br>(5.94-13.33)          | 0.40<br>(0.19-0.73) |
| High-income Asia Pacific     | 0.69<br>(0.49-0.96)   | 0.07<br>(0.04-0.11) | 2.94<br>(2.12-4.02)                   | 0.17<br>(0.10-0.26) | 0.13<br>(0.06-0.27)  | 0.06<br>(0.03-0.11) | 1.08<br>(0.78-1.50)    | 0.09<br>(0.05-0.14) | 2.05<br>(1.45-2.90)             | 0.35<br>(0.14-0.65) | 1.82<br>(1.33-2.42)           | 0.12<br>(0.06-0.21) |
| Australasia                  | 0.43<br>(0.26-0.65)   | 0.04<br>(0.02-0.07) | 1.49<br>(1.00-2.19)                   | 0.09<br>(0.04-0.15) | 0.27<br>(0.05-0.87)  | 0.09<br>(0.03-0.27) | 0.50<br>(0.31-0.75)    | 0.04<br>(0.02-0.07) | 0.78<br>(0.29-1.54)             | 0.12<br>(0.03-0.29) | 1.77<br>(1.16-2.66)           | 0.14<br>(0.06-0.25) |
| Western Europe               | 1.98<br>(1.37-2.78)   | 0.16<br>(0.10-0.26) | 4.40<br>(3.08-6.09)                   | 0.20<br>(0.11-0.30) | 0.82<br>(0.48-1.32)  | 0.21<br>(0.11-0.35) | 3.04<br>(2.14-4.20)    | 0.23<br>(0.13-0.35) | 3.19<br>(2.25-4.50)             | 0.38<br>(0.14-0.76) | 3.30<br>(2.35-4.62)           | 0.19<br>(0.09-0.32) |
| Southern Latin America       | 4.25<br>(3.09-5.95)   | 0.34<br>(0.21-0.51) | 8.30<br>(6.24-10.96)                  | 0.15<br>(0.08-0.25) | 2.66<br>(1.72-3.97)  | 0.59<br>(0.36-0.91) | 6.91<br>(5.19-9.33)    | 0.51<br>(0.31-0.75) | 8.44<br>(6.30-11.19)            | 1.00<br>(0.38-1.87) | 6.70<br>(5.05-8.88)           | 0.33<br>(0.17-0.56) |
| High-income North America    | 1.03<br>(0.71-1.48)   | 0.09<br>(0.05-0.14) | 2.36<br>(1.63-3.32)                   | 0.12<br>(0.07-0.19) | 0.43<br>(0.20-0.76)  | 0.12<br>(0.06-0.20) | 1.36<br>(0.95-1.95)    | 0.11<br>(0.06-0.17) | 1.72<br>(1.14-2.52)             | 0.22<br>(0.08-0.44) | 1.74<br>(1.19-2.47)           | 0.11<br>(0.05-0.20) |
| Caribbean                    | 4.14<br>(2.83-5.87)   | 0.31<br>(0.18-0.48) | 8.08<br>(5.54-11.44)                  | 0.18<br>(0.07-0.35) | 0.74<br>(0.26-1.85)  | 0.20<br>(0.08-0.43) | 5.65<br>(3.87-7.93)    | 0.38<br>(0.22-0.60) | 7.31<br>(4.74-10.81)            | 1.07<br>(0.41-2.05) | 7.36<br>(5.06-10.30)          | 0.36<br>(0.18-0.63) |
| Andean Latin America         | 7.06<br>(4.91-9.81)   | 0.52<br>(0.31-0.79) | 9.38<br>(6.56-12.98)                  | 0.17<br>(0.06-0.35) | 1.54<br>(0.56-3.07)  | 0.36<br>(0.14-0.75) | 6.43<br>(4.42-8.87)    | 0.40<br>(0.23-0.62) | 7.82<br>(5.07-11.35)            | 0.90<br>(0.29-1.83) | 9.05<br>(6.35-12.44)          | 0.41<br>(0.20-0.69) |
| Central Latin America        | 2.08<br>(1.33-3.06)   | 0.18<br>(0.10-0.28) | 5.75<br>(3.88-8.07)                   | 0.16<br>(0.06-0.31) | 1.13<br>(0.59-2.02)  | 0.29<br>(0.15-0.53) | 3.02<br>(2.00-4.28)    | 0.23<br>(0.13-0.36) | 5.27<br>(3.16-8.00)             | 0.77<br>(0.26-1.52) | 4.62<br>(3.14-6.59)           | 0.25<br>(0.12-0.45) |
| Tropical Latin America       | 4.54<br>(3.20-6.45)   | 0.36<br>(0.21-0.55) | 7.72<br>(5.62-10.34)                  | 0.21<br>(0.10-0.36) | 4.06<br>(2.69-5.75)  | 0.90<br>(0.54-1.34) | 6.23<br>(4.57-8.50)    | 0.46<br>(0.28-0.69) | 6.06<br>(3.52-9.03)             | 0.45<br>(0.12-1.03) | 5.66<br>(4.15-7.70)           | 0.27<br>(0.13-0.46) |
| North Africa and Middle East | 2.43<br>(1.63-3.52)   | 0.19<br>(0.12-0.30) | 5.33<br>(3.57-7.64)                   | 0.06<br>(0.03-0.12) | 2.18<br>(1.35-3.22)  | 0.51<br>(0.30-0.80) | 3.65<br>(2.40-5.25)    | 0.26<br>(0.15-0.42) | 5.38<br>(3.56-7.77)             | 0.61<br>(0.23-1.14) | 4.49<br>(3.03-6.43)           | 0.22<br>(0.11-0.39) |
| South Asia                   | 6.82<br>(4.78-9.51)   | 0.53<br>(0.32-0.78) | 8.66<br>(6.12-11.93)                  | 0.08<br>(0.04-0.13) | 7.30<br>(5.08-10.34) | 1.73<br>(1.12-2.62) | 7.42<br>(5.21-10.31)   | 0.50<br>(0.30-0.77) | 8.41<br>(5.89-11.77)            | 0.41<br>(0.11-0.63) | 6.52<br>(4.62-9.05)           | 0.28<br>(0.13-0.48) |
| Central Sub-Saharan Africa   | 10.12<br>(7.39-13.40) | 0.72<br>(0.44-1.08) | 12.77<br>(9.65-16.73)                 | 0.21<br>(0.04-0.50) | 0.37<br>(0.07-1.27)  | 0.12<br>(0.04-0.31) | 9.68<br>(7.26-12.68)   | 0.59<br>(0.35-0.90) | 11.38<br>(6.98-16.16)           | 1.48<br>(0.51-2.84) | 12.67<br>(9.51-16.55)         | 0.57<br>(0.28-0.94) |
| Eastern Sub-Saharan Africa   | 11.28<br>(8.64-14.64) | 0.82<br>(0.52-1.21) | 14.30<br>(10.97-18.38)                | 0.21<br>(0.10-0.34) | 1.57<br>(1.06-2.25)  | 0.34<br>(0.21-0.52) | 9.81<br>(7.48-12.71)   | 0.60<br>(0.36-0.90) | 12.75<br>(9.68-16.75)           | 1.59<br>(0.62-2.94) | 13.87<br>(10.67-17.87)        | 0.62<br>(0.31-1.01) |
| Southern Sub-Saharan Africa  | 2.52<br>(1.77-3.51)   | 0.21<br>(0.13-0.31) | 11.49<br>(8.75-15.02)                 | 0.11<br>(0.02-0.25) | 1.66<br>(1.24-2.28)  | 0.45<br>(0.30-0.65) | 5.49<br>(4.12-7.27)    | 0.41<br>(0.25-0.61) | 12.02<br>(8.99-15.91)           | 1.89<br>(0.76-3.38) | 12.21<br>(9.33-15.76)         | 0.70<br>(0.36-1.14) |
| Western Sub-Saharan Africa   | 14.82<br>(11.2-19.27) | 1.04<br>(0.66-1.52) | 19.17<br>(14.61-24.58)                | 0.22<br>(0.12-0.37) | 2.69<br>(0.86-5.95)  | 0.58<br>(0.22-1.27) | 15.54<br>(11.85-20.04) | 0.95<br>(0.57-1.45) | 17.35<br>(13.27-22.62)          | 2.00<br>(0.73-3.68) | 19.50<br>(14.94-25.01)        | 0.86<br>(0.42-1.40) |

95% uncertainty intervals are shown in parentheses. AWR=Associated with resistance; ATR=Attributable to resistance; AMR: antimicrobial resistance; KP=Klebsiella pneumoniae.
